# Supplementary material for: DNA Methylation-Based Deconvolution Study of Glioblastoma Heterogeneity and Cell Types Associated with Patient Survival
Source: Research Square preprint supplement (doi:10.21203/rs.3.rs-6743395/v1), 2025-06-09
Supplement: Supplementary file 1 [file 29754282f6b99773dd6b3d0a.xlsx]

## Sheet: Descriptions
Sheet	Description
16CT_Ref_Atlas_FigS4	The methylation atlas used to deconvolve glial tumor samples from Heidelberg set. It includes 16 cell types (columns) and 4,712 CpG sites (rows), as detailed and illustrated in Figure S3 of the original article.
14CT_Ref_Atlas_Fig2	The methylation atlas used to deconvolve glioblastoma samples from Heidelberg set and TCGA. It includes 14 cell types (columns) and 4,111 CpG sites (rows), as detailed and illustrated in Figure 2 of the original article.
25CT_Ref_Atlas_FigS1	The methylation atlas used to deconvolve non-glial tumor samples from TCGA shown in Figure S1 in the original article. It includes 25 cell types (columns) and 7,390 CpG sites (rows) as described in Moss et al.
n199_Surv_clinical_data	Clinical data for the 199 glioblastoma, IDH-wildtype samples included in the survival analysis. These samples were treated according to the Stupp protocol, which consists of radiation therapy (RT) with concurrent and adjuvant temozolomide (TMZ). The 'Age' column contains patient age in years. The 'MethClass' column indicates the methylation-based classification assigned by the DKFZ classifier. Th…

## Sheet: 16CT_Ref_Atlas_FigS4
CpG	Monocytes EPIC	B-cells EPIC	CD4T-cells EPIC	NK-cells EPIC	CD8T-cells EPIC	Neutrophils EPIC	Vascular endothelial cells	Mesenchymal SC	Cortical neurons NRN2	ASC2 Astrocytes	Oligodendrocytes	Microglia	NSC	OLIG2	Oligodendrocyte progenitor cells	Pre-Oligodendrocytes
cg08169020	0.887	0.262	0.015	0.078	0.016	0.868	0.032	0.086	0.021	0.032	0.009	0.442	0.183	0.007	0.003	0.01
cg13522882	0.856	0.629	0.235	0.716	0.335	0.866	0.146	0.08	0.066	0.079	0.039	0.682	0.073	0.058	0.041	0.034
cg19163395	0.883	0.857	0.129	0.868	0.174	0.924	0.323	0.171	0.016	0.044	0.025	0.634	0.03	0.069	0	0.025
cg14789659	0.819	0.683	0.217	0.62	0.525	0.854	0.17	0.102	0.051	0.097	0.047	0.409	0.088	0.062	0.053	0.055
cg00928816	0.796	0.682	0.327	0.644	0.553	0.854	0.223	0.143	0.111	0.073	0.059	0.52	0.078	0.1	0.059	0.058
cg20746552	0.697	0.643	0.321	0.563	0.544	0.759	0.23	0.158	0.106	0.106	0.076	0.436	0.077	0.092	0.064	0.069
cg16389209	0.749	0.6	0.288	0.602	0.496	0.804	0.203	0.126	0.095	0.073	0.06	0.406	0.127	0.145	0.074	0.082
cg25170017	0.886	0.512	0.102	0.436	0.087	0.704	0.097	0.142	0.445	0.041	0.079	0.581	0.494	0.385	0.177	0.161
cg11975790	0.725	0.248	0.158	0.64	0.189	0.756	0.442	0.195	0.042	0.167	0.046	0.579	0.085	0.056	0.059	0.045
cg25607383	0.786	0.516	0.444	0.689	0.467	0.779	0.472	0.335	0.125	0.327	0.133	0.638	0.355	0.258	0.122	0.106
cg01424562	0.849	0.559	0.107	0.41	0.132	0.837	0.181	0.132	0.107	0.127	0.062	0.636	0.5	0.273	0.217	0.091
cg27377289	0.895	0.041	0.111	0.734	0.168	0.901	0.617	0.154	0.119	0.196	0.084	0.701	0.609	0.107	0.045	0.04
cg00458932	0.811	0.581	0.407	0.683	0.436	0.784	0.178	0.02	0.219	0.062	0.206	0.378	0.055	0.088	0.038	0.073
cg02962602	0.557	0.481	0.327	0.281	0.231	0.494	0.181	0.082	0.037	0.066	0.05	0.308	0.208	0.054	0.053	0.055
cg05052463	0.855	0.155	0.478	0.579	0.443	0.846	0.294	0.1	0.04	0.239	0.117	0.732	0.346	0.041	0.044	0.041
cg00936790	0.8	0.578	0.132	0.535	0.286	0.79	0.168	0.099	0.467	0.093	0.059	0.462	0.436	0.105	0.033	0.022
cg07218880	0.741	0.38	0.155	0.085	0.177	0.805	0.319	0.142	0.058	0.122	0.125	0.591	0.429	0.313	0.149	0.124
cg02737268	0.913	0.098	0.141	0.358	0.135	0.899	0.407	0.724	0.073	0.927	0.426	0.453	0.102	0.051	0.064	0.082
cg18198306	0.38	0.305	0.1	0.293	0.124	0.274	0.137	0.22	0.053	0.15	0.068	0.226	0.037	0.007	0.05	0.039
cg12827637	0.521	0.361	0.023	0.212	0.022	0.537	0.08	0.109	0.011	0.059	0.058	0.508	0.379	0.376	0.112	0.056
cg07520810	0.549	0.551	0.255	0.527	0.471	0.637	0.131	0.087	0.067	0.052	0.041	0.356	0.063	0.044	0.036	0.04
cg14789659	0.819	0.683	0.217	0.62	0.525	0.854	0.17	0.102	0.051	0.097	0.047	0.409	0.088	0.062	0.053	0.055
cg00928816	0.796	0.682	0.327	0.644	0.553	0.854	0.223	0.143	0.111	0.073	0.059	0.52	0.078	0.1	0.059	0.058
cg20746552	0.697	0.643	0.321	0.563	0.544	0.759	0.23	0.158	0.106	0.106	0.076	0.436	0.077	0.092	0.064	0.069
cg16401465	0.76	0.66	0.333	0.698	0.576	0.815	0.183	0.108	0.126	0.11	0.085	0.457	0.242	0.162	0.098	0.087
cg16389209	0.749	0.6	0.288	0.602	0.496	0.804	0.203	0.126	0.095	0.073	0.06	0.406	0.127	0.145	0.074	0.082
cg27037013	0.722	0.618	0.186	0.18	0.155	0.708	0.589	0.422	0.081	0.159	0.144	0.54	0.057	0.061	0.048	0.082
cg14789659	0.819	0.683	0.217	0.62	0.525	0.854	0.17	0.102	0.051	0.097	0.047	0.409	0.088	0.062	0.053	0.055
cg00928816	0.796	0.682	0.327	0.644	0.553	0.854	0.223	0.143	0.111	0.073	0.059	0.52	0.078	0.1	0.059	0.058
cg20746552	0.697	0.643	0.321	0.563	0.544	0.759	0.23	0.158	0.106	0.106	0.076	0.436	0.077	0.092	0.064	0.069
cg16389209	0.749	0.6	0.288	0.602	0.496	0.804	0.203	0.126	0.095	0.073	0.06	0.406	0.127	0.145	0.074	0.082
cg12474798	0.52	0.42	0.29	0.498	0.347	0.532	0.13	0.158	0.015	0.04	0.02	0.412	0.026	0.03	0.025	0.028
cg20684110	0.536	0.392	0.34	0.515	0.405	0.54	0.161	0.262	0.035	0.111	0.078	0.385	0.084	0.115	0.109	0.108
cg01005506	0.327	0.335	0.235	0.315	0.257	0.329	0.134	0.082	0.045	0.087	0.067	0.325	0.06	0.056	0.065	0.067
cg08832851	0.392	0.038	0.036	0.05	0.036	0.43	0.166	0.115	0.214	0.183	0.465	0.312	0.019	0.069	0.051	0.063
cg11006453	0.885	0.633	0.226	0.525	0.192	0.887	0.22	0.2	0.017	0.054	0.815	0.372	0.562	0.207	0.056	0.143
cg23731089	0.926	0.75	0.329	0.806	0.319	0.927	0.337	0.33	0.068	0.117	0.557	0.695	0.575	0.234	0.05	0.11
cg13157980	0.371	0.492	0.075	0.261	0.074	0.487	0.12	0.074	0.037	0.074	0.151	0.231	0.374	0.11	0.065	0.079
cg22109530	0.663	0.528	0.408	0.595	0.392	0.671	0.074	0.147	0.216	0.182	0.101	0.486	0.011	0.012	0.009	0.018
cg14515791	0.875	0.792	0.718	0.837	0.703	0.872	0.216	0.197	0.291	0.21	0.138	0.772	0.132	0.134	0.134	0.138
cg04858631	0.659	0.148	0.079	0.052	0.161	0.644	0.219	0.137	0.231	0.718	0.1	0.499	0.432	0.212	0.129	0.082
cg19692929	0.437	0.309	0.049	0.192	0.075	0.463	0.2	0.194	0.1	0.257	0.098	0.363	0.086	0.07	0.056	0.04
cg25526001	0.74	0.244	0.261	0.348	0.377	0.738	0.392	0.277	0.068	0.09	0.091	0.579	0.473	0.231	0.114	0.065
cg16829306	0.375	0.298	0.113	0.208	0.067	0.365	0.11	0.121	0.075	0.1	0.091	0.333	0.078	0.096	0.07	0.083
cg08309687	0.548	0.586	0.085	0.08	0.077	0.593	0.395	0.452	0.047	0.093	0.158	0.42	0.086	0.055	0.062	0.049
cg25979108	0.21	0.159	0.095	0.12	0.092	0.138	0.06	0.095	0.035	0.098	0.039	0.109	0.042	0.053	0.058	0.049
cg06578276	0.637	0.529	0.338	0.531	0.309	0.624	0.375	0.11	0.072	0.073	0.121	0.394	0.096	0.079	0.077	0.079
cg05906166	0.382	0.19	0.047	0.049	0.043	0.438	0.155	0.119	0.173	0.145	0.302	0.343	0.037	0.071	0.077	0.099
cg25499543	0.849	0.801	0.566	0.736	0.612	0.834	0.227	0.154	0.119	0.106	0.121	0.713	0.432	0.33	0.079	0.108
cg25503381	0.769	0.659	0.429	0.619	0.467	0.769	0.179	0.152	0.116	0.128	0.088	0.62	0.164	0.083	0.073	0.074
cg17150898	0.858	0.549	0.175	0.842	0.296	0.852	0.338	0.398	0.016	0.578	0.187	0.577	0.03	0.109	0.123	0.093
cg16215084	0.829	0.823	0.362	0.82	0.472	0.797	0.338	0.192	0.072	0.08	0.111	0.726	0.063	0.057	0.054	0.057
cg25251478	0.845	0.834	0.447	0.835	0.533	0.827	0.437	0.274	0.105	0.106	0.128	0.733	0.12	0.121	0.108	0.106
cg03626672	0.717	0.559	0.678	0.519	0.353	0.713	0.222	0.158	0.199	0.132	0.18	0.542	0.017	0.01	0.041	0.028
cg06025456	0.87	0.555	0.916	0.588	0.919	0.901	0.089	0.13	0.037	0.361	0.049	0.67	0.014	0.038	0.018	0.012
cg23359665	0.89	0.589	0.922	0.595	0.932	0.898	0.145	0.142	0.021	0.425	0.051	0.683	0.006	0.042	0.011	0.026
cg13934406	0.85	0.554	0.872	0.551	0.895	0.859	0.104	0.137	0.023	0.432	0.059	0.758	0.008	0.042	0.023	0.018
cg25426302	0.865	0.69	0.858	0.725	0.884	0.86	0.259	0.195	0.038	0.545	0.169	0.719	0.067	0.178	0.1	0.104
cg06108383	0.88	0.689	0.892	0.645	0.909	0.883	0.317	0.216	0.056	0.503	0.178	0.72	0.13	0.331	0.155	0.209
cg17113856	0.758	0.594	0.823	0.594	0.838	0.75	0.308	0.212	0.071	0.486	0.159	0.607	0.081	0.202	0.115	0.137
cg07520810	0.549	0.551	0.255	0.527	0.471	0.637	0.131	0.087	0.067	0.052	0.041	0.356	0.063	0.044	0.036	0.04
cg14789659	0.819	0.683	0.217	0.62	0.525	0.854	0.17	0.102	0.051	0.097	0.047	0.409	0.088	0.062	0.053	0.055
cg00928816	0.796	0.682	0.327	0.644	0.553	0.854	0.223	0.143	0.111	0.073	0.059	0.52	0.078	0.1	0.059	0.058
cg20746552	0.697	0.643	0.321	0.563	0.544	0.759	0.23	0.158	0.106	0.106	0.076	0.436	0.077	0.092	0.064	0.069
cg16389209	0.749	0.6	0.288	0.602	0.496	0.804	0.203	0.126	0.095	0.073	0.06	0.406	0.127	0.145	0.074	0.082
cg05056497	0.728	0.596	0.225	0.185	0.376	0.454	0.123	0.102	0.372	0.089	0.258	0.437	0.673	0.399	0.065	0.088
cg07520810	0.549	0.551	0.255	0.527	0.471	0.637	0.131	0.087	0.067	0.052	0.041	0.356	0.063	0.044	0.036	0.04
cg20746552	0.697	0.643	0.321	0.563	0.544	0.759	0.23	0.158	0.106	0.106	0.076	0.436	0.077	0.092	0.064	0.069
cg16401465	0.76	0.66	0.333	0.698	0.576	0.815	0.183	0.108	0.126	0.11	0.085	0.457	0.242	0.162	0.098	0.087
cg16389209	0.749	0.6	0.288	0.602	0.496	0.804	0.203	0.126	0.095	0.073	0.06	0.406	0.127	0.145	0.074	0.082
cg03974193	0.781	0.723	0.282	0.832	0.368	0.821	0.194	0.252	0.105	0.195	0.053	0.724	0.087	0.066	0.047	0.056
cg06025456	0.87	0.555	0.916	0.588	0.919	0.901	0.089	0.13	0.037	0.361	0.049	0.67	0.014	0.038	0.018	0.012
cg23359665	0.89	0.589	0.922	0.595	0.932	0.898	0.145	0.142	0.021	0.425	0.051	0.683	0.006	0.042	0.011	0.026
cg13934406	0.85	0.554	0.872	0.551	0.895	0.859	0.104	0.137	0.023	0.432	0.059	0.758	0.008	0.042	0.023	0.018
cg10551329	0.785	0.555	0.843	0.55	0.879	0.785	0.148	0.295	0.029	0.517	0.155	0.632	0.047	0.123	0.085	0.103
cg06108383	0.88	0.689	0.892	0.645	0.909	0.883	0.317	0.216	0.056	0.503	0.178	0.72	0.13	0.331	0.155	0.209
cg16481280	0.899	0.743	0.893	0.767	0.92	0.901	0.254	0.16	0.026	0.556	0.397	0.78	0.055	0.297	0.171	0.222
cg17113856	0.758	0.594	0.823	0.594	0.838	0.75	0.308	0.212	0.071	0.486	0.159	0.607	0.081	0.202	0.115	0.137
cg14611816	0.536	0.449	0.329	0.468	0.281	0.52	0.303	0.099	0.052	0.076	0.089	0.352	0.097	0.068	0.068	0.06
cg07520810	0.549	0.551	0.255	0.527	0.471	0.637	0.131	0.087	0.067	0.052	0.041	0.356	0.063	0.044	0.036	0.04
cg16401465	0.76	0.66	0.333	0.698	0.576	0.815	0.183	0.108	0.126	0.11	0.085	0.457	0.242	0.162	0.098	0.087
cg16389209	0.749	0.6	0.288	0.602	0.496	0.804	0.203	0.126	0.095	0.073	0.06	0.406	0.127	0.145	0.074	0.082
cg20968678	0.759	0.555	0.229	0.56	0.277	0.739	0.556	0.37	0.132	0.187	0.118	0.586	0.171	0.103	0.075	0.088
cg06025456	0.87	0.555	0.916	0.588	0.919	0.901	0.089	0.13	0.037	0.361	0.049	0.67	0.014	0.038	0.018	0.012
cg23359665	0.89	0.589	0.922	0.595	0.932	0.898	0.145	0.142	0.021	0.425	0.051	0.683	0.006	0.042	0.011	0.026
cg13934406	0.85	0.554	0.872	0.551	0.895	0.859	0.104	0.137	0.023	0.432	0.059	0.758	0.008	0.042	0.023	0.018
cg06108383	0.88	0.689	0.892	0.645	0.909	0.883	0.317	0.216	0.056	0.503	0.178	0.72	0.13	0.331	0.155	0.209
cg17113856	0.758	0.594	0.823	0.594	0.838	0.75	0.308	0.212	0.071	0.486	0.159	0.607	0.081	0.202	0.115	0.137
cg20897136	0.326	0.264	0.102	0.111	0.088	0.32	0.176	0.119	0.114	0.244	0.096	0.322	0.12	0.139	0.188	0.16
cg01839993	0.438	0.221	0.078	0.096	0.104	0.405	0.245	0.113	0.117	0.494	0.102	0.386	0.247	0.263	0.305	0.234
cg10592592	0.34	0.186	0.063	0.068	0.057	0.318	0.152	0.086	0.066	0.212	0.083	0.317	0.135	0.108	0.194	0.109
cg20749792	0.869	0.877	0.137	0.594	0.284	0.85	0.166	0.091	0.405	0.765	0.091	0.703	0.342	0.125	0.05	0.06
cg26757820	0.591	0.179	0.089	0.425	0.287	0.548	0.173	0.12	0.057	0.759	0.091	0.463	0.397	0.068	0.06	0.059
cg05258935	0.951	0.956	0.952	0.95	0.96	0.936	0.166	0.025	0.007	0.171	0.007	0.953	0.008	0.008	0.009	0.009
cg11316887	0.825	0.151	0.267	0.085	0.187	0.876	0.347	0.135	0.778	0.293	0.331	0.644	0.409	0.47	0.151	0.191
cg06346307	0.731	0.479	0.332	0.675	0.377	0.671	0.249	0.259	0.295	0.32	0.115	0.558	0.068	0.123	0.104	0.086
cg12897164	0.634	0.06	0.437	0.098	0.341	0.823	0.198	0.076	0.293	0.081	0.084	0.521	0.503	0.318	0.091	0.167
cg17970299	0.879	0.889	0.856	0.826	0.867	0.869	0.288	0.064	0.047	0.067	0.117	0.681	0.033	0.041	0.015	0.02
cg12947138	0.781	0.636	0.573	0.737	0.558	0.751	0.336	0.117	0.13	0.084	0.083	0.686	0.088	0.139	0.065	0.07
cg06382930	0.457	0.416	0.066	0.37	0.098	0.443	0.243	0.153	0.121	0.342	0.121	0.412	0.067	0.039	0.031	0.043
cg20038070	0.767	0.695	0.478	0.575	0.549	0.75	0.316	0.119	0.039	0.562	0.081	0.639	0.065	0.034	0.04	0.042
cg10509607	0.706	0.673	0.063	0.644	0.11	0.633	0.115	0.119	0.118	0.132	0.063	0.613	0.833	0.369	0.057	0.048
cg08433504	0.844	0.821	0.838	0.756	0.769	0.846	0.223	0.193	0.099	0.052	0.034	0.746	0.034	0.028	0.038	0.022
cg10078511	0.697	0.652	0.605	0.609	0.585	0.692	0.203	0.123	0.099	0.073	0.102	0.608	0.081	0.061	0.045	0.063
cg26047334	0.725	0.456	0.323	0.529	0.325	0.644	0.125	0.218	0.754	0.088	0.09	0.563	0.22	0.224	0.094	0.086
cg06401414	0.889	0.532	0.426	0.764	0.488	0.888	0.398	0.544	0.061	0.049	0.089	0.642	0.659	0.219	0.021	0.041
cg08659179	0.725	0.566	0.518	0.537	0.508	0.712	0.165	0.116	0.045	0.63	0.069	0.658	0.038	0.097	0.044	0.053
cg05204104	0.555	0.596	0.054	0.063	0.053	0.524	0.37	0.13	0.053	0.674	0.304	0.564	0.052	0.041	0.112	0.06
cg19645639	0.726	0.537	0.375	0.739	0.458	0.791	0.189	0.052	0.051	0.057	0.049	0.616	0.064	0.325	0.247	0.234
cg20805133	0.929	0.371	0.028	0.41	0.028	0.917	0.102	0.217	0.095	0.868	0.058	0.625	0.784	0.746	0.476	0.408
cg07438103	0.586	0.488	0.143	0.427	0.094	0.575	0.161	0.144	0.139	0.143	0.098	0.518	0.267	0.231	0.241	0.196
cg15815318	0.79	0.635	0.524	0.695	0.522	0.792	0.714	0.286	0.212	0.415	0.446	0.651	0.179	0.079	0.024	0.066
cg09850101	0.842	0.632	0.55	0.714	0.527	0.853	0.524	0.2	0.106	0.293	0.154	0.676	0.221	0.041	0.028	0.035
cg20741105	0.813	0.1	0.593	0.549	0.412	0.846	0.222	0.33	0.245	0.217	0.519	0.726	0.435	0.046	0.068	0.054
cg08433504	0.844	0.821	0.838	0.756	0.769	0.846	0.223	0.193	0.099	0.052	0.034	0.746	0.034	0.028	0.038	0.022
cg10078511	0.697	0.652	0.605	0.609	0.585	0.692	0.203	0.123	0.099	0.073	0.102	0.608	0.081	0.061	0.045	0.063
cg24082121	0.582	0.552	0.244	0.31	0.325	0.556	0.124	0.11	0.204	0.213	0.044	0.404	0.62	0.119	0.023	0.011
cg24503369	0.856	0.718	0.537	0.73	0.575	0.852	0.243	0.128	0.185	0.163	0.398	0.71	0.125	0.11	0.083	0.128
cg26637901	0.123	0.136	0.116	0.13	0.109	0.128	0.16	0.216	0.249	0.266	0.235	0.12	0.181	0.289	0.221	0.205
cg19789919	0.308	0.246	0.159	0.17	0.075	0.24	0.069	0.253	0.176	0.213	0.094	0.075	0.028	0.084	0.105	0.065
cg18486815	0.878	0.865	0.857	0.859	0.883	0.848	0.268	0.297	0.051	0.154	0.21	0.908	0.127	0.118	0.115	0.097
cg12655375	0.802	0.782	0.771	0.779	0.78	0.753	0.17	0.204	0.046	0.083	0.09	0.761	0.03	0.039	0.022	0.027
cg09862193	0.866	0.814	0.758	0.847	0.762	0.851	0.179	0.123	0.225	0.124	0.094	0.781	0.053	0.056	0.045	0.051
cg19222784	0.783	0.182	0.537	0.679	0.513	0.799	0.341	0.259	0.508	0.091	0.367	0.631	0.032	0.089	0.078	0.107
cg20949700	0.883	0.813	0.866	0.861	0.852	0.886	0.535	0.449	0.854	0.213	0.464	0.842	0.042	0.108	0.095	0.13
cg03419014	0.836	0.829	0.738	0.741	0.801	0.836	0.372	0.418	0.162	0.248	0.087	0.746	0.035	0.302	0.118	0.187
cg14785464	0.406	0.405	0.285	0.298	0.374	0.394	0.09	0.173	0.038	0.134	0.008	0.412	0.054	0.066	0.052	0.062
cg06167719	0.469	0.481	0.356	0.375	0.46	0.456	0.102	0.167	0.046	0.091	0.017	0.453	0.029	0.06	0	0.032
cg09037712	0.712	0.75	0.686	0.667	0.736	0.701	0.439	0.297	0.19	0.425	0.137	0.648	0.103	0.256	0.14	0.207
cg10983484	0.755	0.051	0.489	0.776	0.617	0.742	0.201	0.087	0.442	0.069	0.52	0.604	0.081	0.173	0.067	0.119
cg14845962	0.916	0.91	0.939	0.91	0.947	0.897	0.139	0.175	0.095	0.057	0.12	0.694	0.006	0.106	0.046	0.084
cg10513118	0.844	0.782	0.69	0.781	0.712	0.828	0.269	0.178	0.056	0.125	0.127	0.712	0.074	0.115	0.095	0.102
cg11006453	0.885	0.633	0.226	0.525	0.192	0.887	0.22	0.2	0.017	0.054	0.815	0.372	0.562	0.207	0.056	0.143
cg23731089	0.926	0.75	0.329	0.806	0.319	0.927	0.337	0.33	0.068	0.117	0.557	0.695	0.575	0.234	0.05	0.11
cg08884752	0.716	0.829	0.123	0.849	0.418	0.761	0.162	0.147	0.047	0.085	0.254	0.49	0.258	0.207	0.091	0.077
cg07976603	0.32	0.291	0.085	0.309	0.085	0.312	0.11	0.108	0.081	0.1	0.037	0.262	0.089	0.094	0.097	0.089
cg19628600	0.789	0.72	0.525	0.711	0.625	0.785	0.105	0.104	0.388	0.096	0.073	0.595	0.108	0.246	0.078	0.152
cg15052447	0.742	0.712	0.533	0.64	0.494	0.599	0.108	0.159	0.106	0.399	0.24	0.689	0.163	0.077	0.025	0.057
cg04667114	0.818	0.805	0.155	0.542	0.282	0.79	0.188	0.124	0.409	0.601	0.101	0.677	0.471	0.212	0.07	0.089
cg16988611	0.713	0.559	0.188	0.532	0.222	0.635	0.253	0.253	0.092	0.858	0.169	0.638	0.1	0.097	0.108	0.102
cg11895835	0.877	0.262	0.263	0.588	0.317	0.845	0.227	0.14	0.233	0.151	0.575	0.669	0.694	0.254	0.425	0.272
cg01558645	0.857	0.852	0.294	0.729	0.366	0.831	0.427	0.323	0.042	0.142	0.106	0.721	0.586	0.195	0.098	0.073
cg16215084	0.829	0.823	0.362	0.82	0.472	0.797	0.338	0.192	0.072	0.08	0.111	0.726	0.063	0.057	0.054	0.057
cg25251478	0.845	0.834	0.447	0.835	0.533	0.827	0.437	0.274	0.105	0.106	0.128	0.733	0.12	0.121	0.108	0.106
cg04206284	0.466	0.114	0.195	0.281	0.151	0.423	0.244	0.186	0.244	0.35	0.268	0.427	0.076	0.056	0.08	0.052
cg02696067	0.871	0.135	0.382	0.831	0.445	0.856	0.576	0.243	0.561	0.755	0.184	0.717	0.028	0.049	0.093	0.037
cg22125926	0.331	0.319	0.041	0.254	0.157	0.294	0.099	0.152	0.065	0.315	0.059	0.298	0.067	0.054	0.035	0.028
cg12743970	0.884	0.87	0.792	0.863	0.812	0.865	0.405	0.153	0.058	0.112	0.048	0.811	0.047	0.059	0.044	0.04
cg07942135	0.874	0.825	0.752	0.844	0.741	0.856	0.291	0.295	0.051	0.099	0.082	0.791	0.076	0.064	0.082	0.072
cg10794257	0.898	0.832	0.763	0.87	0.703	0.894	0.376	0.399	0.117	0.151	0.166	0.836	0.044	0.111	0.117	0.152
cg07917150	0.884	0.871	0.851	0.879	0.826	0.896	0.383	0.3	0.056	0.119	0.084	0.848	0.071	0.083	0.073	0.078
cg00842549	0.599	0.547	0.455	0.64	0.481	0.539	0.304	0.23	0.065	0.093	0.066	0.511	0.046	0.024	0.034	0.027
cg24767968	0.815	0.804	0.81	0.821	0.83	0.792	0.74	0.638	0.115	0.153	0.193	0.755	0.212	0.149	0.241	0.161
cg12474798	0.52	0.42	0.29	0.498	0.347	0.532	0.13	0.158	0.015	0.04	0.02	0.412	0.026	0.03	0.025	0.028
cg20684110	0.536	0.392	0.34	0.515	0.405	0.54	0.161	0.262	0.035	0.111	0.078	0.385	0.084	0.115	0.109	0.108
cg01005506	0.327	0.335	0.235	0.315	0.257	0.329	0.134	0.082	0.045	0.087	0.067	0.325	0.06	0.056	0.065	0.067
cg03466326	0.786	0.505	0.743	0.788	0.729	0.777	0.218	0.101	0.25	0.083	0.241	0.704	0.042	0.043	0.061	0.061
cg23849826	0.721	0.718	0.772	0.653	0.674	0.726	0.181	0.111	0.07	0.08	0.07	0.626	0.092	0.06	0.032	0.041
cg11688949	0.539	0.491	0.397	0.512	0.469	0.551	0.203	0.175	0.033	0.098	0.034	0.49	0.106	0.043	0.03	0.049
cg19352830	0.805	0.573	0.365	0.713	0.457	0.79	0.347	0.401	0.085	0.078	0.184	0.659	0.504	0.183	0.079	0.077
cg07684775	0.773	0.795	0.785	0.768	0.816	0.761	0.173	0.181	0.042	0.127	0.102	0.598	0.034	0.034	0.041	0.029
cg08662757	0.029	0.516	0.031	0.012	0.019	0.016	0.01	0.167	0.076	0.049	0.058	0.197	0.015	0.054	0.029	0.031
cg25753024	0.04	0.501	0.047	0.043	0.036	0.046	0.045	0.226	0.116	0.081	0.07	0.148	0.04	0.069	0.048	0.054
cg22079161	0.09	0.42	0.085	0.078	0.135	0.064	0.044	0.164	0.012	0.074	0.023	0.193	0.01	0.034	0.033	0.022
cg14317609	0.029	0.846	0.059	0.043	0.116	0.031	0.024	0.511	0.048	0.78	0.01	0.205	0.02	0.234	0.087	0.052
cg06671450	0.13	0.382	0.158	0.124	0.175	0.119	0.091	0.253	0.181	0.379	0.146	0.241	0.131	0.254	0.194	0.148
cg11199770	0.009	0.146	0.009	0.008	0.006	0.007	0.002	0.096	0.002	0.047	0	0.158	0.011	0.012	0.007	0.015
cg13650938	0.023	0.408	0.166	0.117	0.195	0.019	0.028	0.101	0.167	0.028	0.038	0.134	0.021	0.06	0.023	0.018
cg10165847	0.012	0.152	0.02	0.014	0.04	0.008	0.023	0.01	0.004	0.042	0.005	0.247	0.007	0.002	0	0.009
cg21918126	0.011	0.151	0.039	0.017	0.109	0.009	0.006	0.08	0.008	0.047	0.007	0.095	0.005	0.008	0	0.007
cg05289892	0.078	0.566	0.081	0.071	0.062	0.062	0.1	0.234	0.042	0.117	0.057	0.321	0.094	0.109	0.131	0.123
cg24634420	0.011	0.156	0.019	0.015	0.061	0.004	0.008	0.065	0.007	0.034	0.003	0.216	0.009	0.004	0.006	0.005
cg20937139	0.051	0.179	0.075	0.054	0.125	0.044	0.051	0.105	0.046	0.067	0.068	0.255	0.066	0.05	0.048	0.065
cg12585966	0.007	0.305	0.17	0.083	0.214	0.012	0.034	0.081	0.009	0.138	0.014	0.123	0.006	0.021	0.008	0.009
cg20536983	0.059	0.26	0.063	0.065	0.106	0.066	0.068	0.158	0.039	0.069	0.05	0.317	0.064	0.057	0.046	0.045
cg03304380	0.025	0.2	0.016	0.017	0.043	0.007	0.028	0.062	0.013	0.038	0.011	0.327	0.004	0.02	0	0.01
cg13920435	0.036	0.272	0.036	0.032	0.025	0.026	0.06	0.126	0.009	0.042	0.031	0.28	0.036	0.02	0.04	0.04
cg01956420	0.022	0.19	0.026	0.011	0.075	0.004	0.009	0.069	0.004	0.042	0.005	0.281	0.013	0.011	0.014	0.004
cg20327444	0.015	0.077	0.021	0.025	0.033	0.007	0.008	0.111	0.008	0.041	0.008	0.077	0.005	0.017	0.001	0.008
cg17541528	0.011	0.118	0.025	0.015	0.041	0.007	0.015	0.03	0.014	0.042	0.003	0.154	0.012	0.001	0.015	0.005
cg10964367	0.018	0.178	0.03	0.021	0.094	0.009	0.016	0.093	0.028	0.044	0.014	0.131	0.022	0.005	0.019	0.012
cg23001131	0.008	0.095	0.011	0.005	0.016	0.003	0.01	0.054	0.008	0.034	0.002	0.132	0.003	0.009	0	0.001
cg19867649	0.013	0.148	0.013	0.014	0.016	0.008	0.018	0.058	0.008	0.049	0.007	0.199	0.017	0.01	0.017	0.016
cg01552272	0.067	0.3	0.189	0.106	0.314	0.04	0.041	0.019	0.006	0.091	0.009	0.234	0.018	0.019	0.015	0.012
cg04624110	0.103	0.36	0.276	0.124	0.369	0.052	0.06	0.039	0.007	0.12	0.008	0.276	0.025	0.023	0.009	0.015
cg23169957	0.074	0.316	0.204	0.108	0.326	0.049	0.055	0.2	0.038	0.132	0.032	0.266	0.03	0.023	0.02	0.028
cg25557432	0.031	0.226	0.093	0.042	0.201	0.016	0.019	0.094	0.004	0.048	0.004	0.219	0	0.007	0.011	0.016
cg04716990	0.022	0.202	0.063	0.028	0.162	0.011	0.013	0.123	0.004	0.048	0.004	0.174	0.013	0.006	0.009	0.009
cg26059153	0.015	0.155	0.059	0.017	0.115	0.008	0.018	0.08	0.002	0.041	0.001	0.127	0.005	0.007	0.005	0.004
cg06571075	0.016	0.162	0.031	0.021	0.116	0.007	0.012	0.058	0.02	0.044	0.006	0.177	0.004	0.005	0	0.006
cg18932726	0.021	0.217	0.029	0.037	0.16	0.007	0.019	0.177	0.004	0.049	0	0.166	0.012	0	0.003	0.015
cg05608777	0.015	0.146	0.023	0.025	0.087	0.009	0.013	0.145	0.01	0.042	0	0.123	0.009	0.006	0	0.011
cg26059153	0.015	0.155	0.059	0.017	0.115	0.008	0.018	0.08	0.002	0.041	0.001	0.127	0.005	0.007	0.005	0.004
cg06571075	0.016	0.162	0.031	0.021	0.116	0.007	0.012	0.058	0.02	0.044	0.006	0.177	0.004	0.005	0	0.006
cg15070718	0.014	0.113	0.045	0.023	0.086	0.011	0.016	0.067	0.005	0.04	0.006	0.029	0	0.009	0.013	0.01
cg01956420	0.022	0.19	0.026	0.011	0.075	0.004	0.009	0.069	0.004	0.042	0.005	0.281	0.013	0.011	0.014	0.004
cg20327444	0.015	0.077	0.021	0.025	0.033	0.007	0.008	0.111	0.008	0.041	0.008	0.077	0.005	0.017	0.001	0.008
cg17541528	0.011	0.118	0.025	0.015	0.041	0.007	0.015	0.03	0.014	0.042	0.003	0.154	0.012	0.001	0.015	0.005
cg07779120	0.012	0.144	0.021	0.008	0.02	0.011	0.012	0.083	0.005	0.035	0.015	0.226	0.005	0.003	0.015	0.014
cg23919479	0.014	0.178	0.052	0.022	0.151	0.013	0.017	0.079	0.005	0.032	0.004	0.161	0.025	0.011	0.008	0.008
cg01552272	0.067	0.3	0.189	0.106	0.314	0.04	0.041	0.019	0.006	0.091	0.009	0.234	0.018	0.019	0.015	0.012
cg04624110	0.103	0.36	0.276	0.124	0.369	0.052	0.06	0.039	0.007	0.12	0.008	0.276	0.025	0.023	0.009	0.015
cg23169957	0.074	0.316	0.204	0.108	0.326	0.049	0.055	0.2	0.038	0.132	0.032	0.266	0.03	0.023	0.02	0.028
cg25557432	0.031	0.226	0.093	0.042	0.201	0.016	0.019	0.094	0.004	0.048	0.004	0.219	0	0.007	0.011	0.016
cg04716990	0.022	0.202	0.063	0.028	0.162	0.011	0.013	0.123	0.004	0.048	0.004	0.174	0.013	0.006	0.009	0.009
cg06571075	0.016	0.162	0.031	0.021	0.116	0.007	0.012	0.058	0.02	0.044	0.006	0.177	0.004	0.005	0	0.006
cg05803631	0.012	0.111	0.012	0.012	0.016	0.027	0.015	0.069	0.014	0.039	0.006	0.106	0.006	0.024	0.013	0.008
cg01444397	0.013	0.121	0.018	0.02	0.025	0.019	0.016	0.08	0.011	0.05	0.017	0.13	0.018	0.044	0.013	0.024
cg24822696	0.013	0.13	0.021	0.014	0.059	0.007	0.012	0.062	0.011	0.044	0.017	0.147	0.021	0.002	0.013	0.006
cg10079740	0.011	0.13	0.018	0.009	0.043	0.005	0.011	0.081	0.006	0.046	0.007	0.194	0.004	0.007	0.009	0.002
cg22950163	0.094	0.179	0.13	0.095	0.145	0.086	0.088	0.146	0.084	0.122	0.097	0.214	0.12	0.103	0.118	0.106
cg18778433	0.037	0.232	0.048	0.046	0.093	0.018	0.026	0.147	0.006	0.04	0.014	0.25	0.022	0.02	0.018	0.02
cg14416311	0.02	0.146	0.03	0.01	0.035	0.009	0.012	0.086	0.032	0.04	0.02	0.189	0.004	0.004	0.012	0.008
cg14344261	0.024	0.41	0.021	0.011	0.016	0.009	0.019	0.165	0.017	0.832	0.006	0.124	0.01	0.124	0.036	0.031
cg13910860	0.06	0.312	0.059	0.053	0.057	0.056	0.066	0.105	0.029	0.372	0.04	0.157	0.065	0.171	0.108	0.079
cg18932726	0.021	0.217	0.029	0.037	0.16	0.007	0.019	0.177	0.004	0.049	0	0.166	0.012	0	0.003	0.015
cg05608777	0.015	0.146	0.023	0.025	0.087	0.009	0.013	0.145	0.01	0.042	0	0.123	0.009	0.006	0	0.011
cg01552272	0.067	0.3	0.189	0.106	0.314	0.04	0.041	0.019	0.006	0.091	0.009	0.234	0.018	0.019	0.015	0.012
cg04624110	0.103	0.36	0.276	0.124	0.369	0.052	0.06	0.039	0.007	0.12	0.008	0.276	0.025	0.023	0.009	0.015
cg23169957	0.074	0.316	0.204	0.108	0.326	0.049	0.055	0.2	0.038	0.132	0.032	0.266	0.03	0.023	0.02	0.028
cg25557432	0.031	0.226	0.093	0.042	0.201	0.016	0.019	0.094	0.004	0.048	0.004	0.219	0	0.007	0.011	0.016
cg04716990	0.022	0.202	0.063	0.028	0.162	0.011	0.013	0.123	0.004	0.048	0.004	0.174	0.013	0.006	0.009	0.009
cg06571075	0.016	0.162	0.031	0.021	0.116	0.007	0.012	0.058	0.02	0.044	0.006	0.177	0.004	0.005	0	0.006
cg01777403	0.029	0.118	0.03	0.01	0.035	0.039	0.004	0.065	0.002	0.033	0.019	0.129	0.014	0.004	0.005	0.003
cg01686920	0.015	0.144	0.032	0.025	0.043	0.012	0.008	0.075	0.035	0.045	0.022	0.146	0.027	0.01	0.008	0.01
cg21117668	0.034	0.146	0.037	0.029	0.048	0.024	0.016	0.095	0.018	0.04	0.005	0.1	0.007	0.018	0.041	0.013
cg15617814	0.022	0.216	0.051	0.033	0.121	0.017	0.029	0.197	0.013	0.064	0.018	0.133	0.007	0.033	0.034	0.012
cg03735496	0.034	0.231	0.053	0.025	0.083	0.021	0.023	0.183	0.006	0.028	0.004	0.322	0.011	0.018	0.019	0.009
cg05673756	0.029	0.161	0.055	0.029	0.08	0.016	0.023	0.077	0.008	0.047	0.01	0.18	0.007	0.005	0.01	0.009
cg13798146	0.013	0.106	0.032	0.009	0.036	0.011	0.01	0.055	0.004	0.032	0.004	0.141	0.019	0.008	0.007	0.007
cg14781189	0.045	0.434	0.275	0.084	0.361	0.035	0.02	0.103	0.002	0.503	0	0.15	0.003	0.007	0.005	0.005
cg13632816	0.019	0.183	0.053	0.032	0.127	0.011	0.018	0.076	0.008	0.054	0.03	0.217	0.009	0.011	0.003	0.007
cg00421139	0.011	0.107	0.024	0.016	0.05	0.01	0.011	0.06	0.014	0.041	0.009	0.128	0.006	0.005	0.005	0.003
cg12894649	0.025	0.2	0.065	0.053	0.239	0.011	0.029	0.104	0.005	0.043	0.01	0.172	0.02	0.007	0.001	0.018
cg23944804	0.018	0.205	0.061	0.042	0.281	0.01	0.026	0.106	0.002	0.032	0.002	0.186	0.011	0	0.01	0.007
cg14603345	0.021	0.233	0.081	0.056	0.296	0.01	0.039	0.093	0.002	0.029	0	0.195	0.014	0.009	0.008	0.01
cg05446424	0.018	0.168	0.04	0.02	0.086	0.015	0.043	0.061	0.01	0.078	0.007	0.171	0.006	0.003	0.058	0.006
cg27100990	0.018	0.163	0.034	0.034	0.091	0.011	0.02	0.086	0.011	0.057	0.019	0.182	0.015	0.003	0.017	0.01
cg06659727	0.024	0.161	0.055	0.022	0.107	0.014	0.022	0.07	0.041	0.033	0.021	0.162	0.01	0.007	0.004	0.009
cg13974632	0.04	0.318	0.157	0.076	0.32	0.021	0.053	0.141	0.018	0.044	0.022	0.251	0.011	0.013	0.011	0.009
cg25984344	0.02	0.21	0.065	0.029	0.199	0.009	0.031	0.13	0.015	0.108	0.003	0.189	0.007	0.015	0.004	0.005
cg03070297	0.022	0.2	0.045	0.023	0.131	0.02	0.032	0.084	0.018	0.104	0.012	0.171	0.029	0.014	0.02	0.02
cg03129384	0.075	0.257	0.136	0.086	0.238	0.055	0.086	0.107	0.065	0.129	0.068	0.229	0.057	0.074	0.067	0.072
cg27593384	0.011	0.098	0.022	0.01	0.05	0.008	0.008	0.058	0.002	0.034	0	0.132	0.013	0.007	0.013	0.002
cg15698842	0.09	0.18	0.126	0.09	0.171	0.08	0.119	0.138	0.075	0.11	0.106	0.214	0.072	0.101	0.09	0.092
cg01244944	0.09	0.26	0.113	0.098	0.173	0.101	0.101	0.189	0.068	0.145	0.059	0.215	0.096	0.095	0.102	0.083
cg27475132	0.023	0.201	0.054	0.026	0.14	0.011	0.045	0.138	0.004	0.065	0.007	0.185	0.019	0.016	0.016	0.012
cg24410535	0.065	0.2	0.099	0.068	0.156	0.059	0.078	0.09	0.067	0.243	0.08	0.194	0.073	0.082	0.077	0.072
cg23344321	0.058	0.438	0.225	0.069	0.198	0.056	0.083	0.153	0.051	0.203	0.061	0.143	0.151	0.081	0.069	0.06
cg05733135	0.041	0.263	0.146	0.07	0.242	0.031	0.027	0.152	0.01	0.044	0.01	0.195	0.012	0.01	0.01	0.006
cg06906472	0.027	0.255	0.034	0.037	0.127	0.007	0.01	0.151	0.004	0.234	0.002	0.325	0	0.007	0.005	0.005
cg27600205	0.009	0.138	0.023	0.014	0.077	0.006	0.023	0.147	0.003	0.051	0	0.111	0.029	0.013	0.009	0.014
cg10524033	0.074	0.176	0.086	0.066	0.107	0.056	0.063	0.111	0.058	0.066	0.052	0.196	0.088	0.058	0.058	0.058
cg14400886	0.066	0.175	0.089	0.07	0.113	0.057	0.074	0.119	0.056	0.088	0.047	0.174	0.079	0.06	0.059	0.063
cg01408654	0.038	0.18	0.05	0.041	0.1	0.023	0.045	0.102	0.042	0.075	0.043	0.178	0.041	0.021	0.023	0.03
cg14102128	0.051	0.2	0.065	0.039	0.097	0.033	0.015	0.114	0.021	0.036	0.01	0.232	0	0.017	0.03	0.008
cg09156233	0.011	0.111	0.022	0.013	0.045	0.008	0.02	0.043	0.003	0.036	0.003	0.196	0.006	0.007	0.006	0.01
cg07910813	0.006	0.089	0.009	0.012	0.022	0.006	0.012	0.098	0.002	0.044	0.007	0.084	0.013	0.01	0.006	0.011
cg14252519	0.019	0.167	0.023	0.016	0.06	0.01	0.023	0.128	0.016	0.048	0.011	0.166	0.007	0.019	0.068	0.033
cg16248329	0.018	0.227	0.029	0.038	0.157	0.004	0.021	0.107	0.018	0.318	0	0.156	0.003	0.001	0.001	0.004
cg05491001	0.054	0.31	0.085	0.061	0.219	0.025	0.022	0.038	0.022	0.288	0.016	0.302	0.023	0.014	0.016	0.016
cg12894649	0.025	0.2	0.065	0.053	0.239	0.011	0.029	0.104	0.005	0.043	0.01	0.172	0.02	0.007	0.001	0.018
cg23944804	0.018	0.205	0.061	0.042	0.281	0.01	0.026	0.106	0.002	0.032	0.002	0.186	0.011	0	0.01	0.007
cg14603345	0.021	0.233	0.081	0.056	0.296	0.01	0.039	0.093	0.002	0.029	0	0.195	0.014	0.009	0.008	0.01
cg05602862	0.025	0.257	0.097	0.045	0.213	0.017	0.037	0.104	0.006	0.194	0.006	0.17	0.036	0.02	0.016	0.015
cg14557714	0.015	0.131	0.016	0.015	0.029	0.009	0.015	0.083	0.004	0.026	0.011	0.213	0.01	0.021	0.02	0.023
cg14051544	0.031	0.25	0.109	0.042	0.178	0.015	0.029	0.083	0.006	0.18	0.002	0.267	0.009	0.006	0.01	0.009
cg25984344	0.02	0.21	0.065	0.029	0.199	0.009	0.031	0.13	0.015	0.108	0.003	0.189	0.007	0.015	0.004	0.005
cg03070297	0.022	0.2	0.045	0.023	0.131	0.02	0.032	0.084	0.018	0.104	0.012	0.171	0.029	0.014	0.02	0.02
cg03129384	0.075	0.257	0.136	0.086	0.238	0.055	0.086	0.107	0.065	0.129	0.068	0.229	0.057	0.074	0.067	0.072
cg20478129	0.013	0.167	0.034	0.037	0.143	0.009	0.03	0.076	0.006	0.033	0.004	0.236	0.011	0.008	0.007	0.009
cg01552272	0.067	0.3	0.189	0.106	0.314	0.04	0.041	0.019	0.006	0.091	0.009	0.234	0.018	0.019	0.015	0.012
cg04624110	0.103	0.36	0.276	0.124	0.369	0.052	0.06	0.039	0.007	0.12	0.008	0.276	0.025	0.023	0.009	0.015
cg23169957	0.074	0.316	0.204	0.108	0.326	0.049	0.055	0.2	0.038	0.132	0.032	0.266	0.03	0.023	0.02	0.028
cg25557432	0.031	0.226	0.093	0.042	0.201	0.016	0.019	0.094	0.004	0.048	0.004	0.219	0	0.007	0.011	0.016
cg04716990	0.022	0.202	0.063	0.028	0.162	0.011	0.013	0.123	0.004	0.048	0.004	0.174	0.013	0.006	0.009	0.009
cg06571075	0.016	0.162	0.031	0.021	0.116	0.007	0.012	0.058	0.02	0.044	0.006	0.177	0.004	0.005	0	0.006
cg04925858	0.067	0.265	0.036	0.077	0.036	0.086	0.055	0.116	0.033	0.064	0.05	0.157	0.043	0.065	0.076	0.095
cg12894649	0.025	0.2	0.065	0.053	0.239	0.011	0.029	0.104	0.005	0.043	0.01	0.172	0.02	0.007	0.001	0.018
cg23944804	0.018	0.205	0.061	0.042	0.281	0.01	0.026	0.106	0.002	0.032	0.002	0.186	0.011	0	0.01	0.007
cg14603345	0.021	0.233	0.081	0.056	0.296	0.01	0.039	0.093	0.002	0.029	0	0.195	0.014	0.009	0.008	0.01
cg22375192	0.009	0.107	0.014	0.016	0.021	0.01	0.022	0.068	0.02	0.044	0.01	0.142	0.008	0.009	0.017	0.018
cg05403555	0.022	0.149	0.062	0.034	0.125	0.015	0.01	0.084	0.005	0.058	0.002	0.14	0.012	0.008	0.007	0.012
cg06433879	0.014	0.135	0.06	0.018	0.079	0.014	0.024	0.071	0.006	0.047	0.008	0.147	0.015	0.013	0.018	0.01
cg05374412	0.021	0.109	0.051	0.029	0.078	0.018	0.021	0.07	0.003	0.032	0.005	0.085	0.01	0.008	0.004	0.006
cg10276227	0.02	0.204	0.047	0.022	0.065	0.015	0.024	0.093	0.014	0.094	0.013	0.33	0.029	0.02	0.014	0.025
cg20710394	0.014	0.109	0.019	0.015	0.015	0.017	0.018	0.075	0.004	0.043	0.006	0.138	0.03	0.014	0.015	0.018
cg09159285	0.208	0.725	0.363	0.506	0.345	0.269	0.034	0.094	0.452	0.086	0.044	0.347	0.018	0.097	0.025	0.052
cg27539986	0.331	0.701	0.429	0.607	0.403	0.366	0.082	0.183	0.333	0.104	0.045	0.4	0.049	0.2	0.037	0.078
cg03345093	0.025	0.166	0.028	0.035	0.041	0.019	0.023	0.224	0.019	0.072	0.023	0.11	0	0.02	0.023	0.015
cg24869601	0.044	0.254	0.148	0.059	0.219	0.04	0.039	0.107	0.021	0.038	0.034	0.226	0.01	0.022	0.015	0.016
cg16418810	0.015	0.144	0.02	0.011	0.054	0.01	0.026	0.107	0.009	0.058	0.014	0.2	0.015	0.022	0.012	0.02
cg12708634	0.041	0.189	0.087	0.049	0.134	0.031	0.062	0.158	0.009	0.115	0.02	0.225	0.021	0.037	0.045	0.042
cg27549952	0.024	0.194	0.087	0.05	0.141	0.021	0.038	0.106	0.022	0.057	0.029	0.143	0.018	0.019	0.025	0.018
cg11163620	0.039	0.193	0.055	0.047	0.144	0.031	0.05	0.183	0.006	0.046	0.007	0.222	0.034	0.052	0.043	0.06
cg08712866	0.012	0.097	0.008	0.008	0.031	0.004	0.007	0.097	0.002	0.062	0.002	0.133	0.018	0.002	0.006	0.007
cg10364182	0.048	0.361	0.267	0.095	0.294	0.037	0.085	0.117	0.053	0.099	0.068	0.161	0.032	0.046	0.045	0.04
cg26821327	0.045	0.266	0.176	0.077	0.2	0.042	0.056	0.122	0.041	0.078	0.062	0.116	0.042	0.063	0.056	0.058
cg03242819	0.033	0.222	0.033	0.017	0.082	0.013	0.033	0.093	0.006	0.303	0	0.249	0.021	0.007	0.005	0.02
cg05803631	0.012	0.111	0.012	0.012	0.016	0.027	0.015	0.069	0.014	0.039	0.006	0.106	0.006	0.024	0.013	0.008
cg01444397	0.013	0.121	0.018	0.02	0.025	0.019	0.016	0.08	0.011	0.05	0.017	0.13	0.018	0.044	0.013	0.024
cg03793270	0.096	0.443	0.245	0.108	0.369	0.059	0.036	0.15	0.038	0.252	0.013	0.273	0.013	0.025	0.068	0.085
cg24333845	0.036	0.354	0.048	0.04	0.043	0.037	0.078	0.09	0.031	0.356	0.036	0.05	0.416	0.113	0.056	0.038
cg19397320	0.009	0.082	0.009	0.013	0.036	0.005	0.006	0.072	0.008	0.037	0.005	0.112	0.004	0.007	0.005	0.011
cg12685846	0.042	0.237	0.216	0.084	0.288	0.03	0.027	0.058	0.011	0.026	0.011	0.159	0.011	0.003	0.017	0.005
cg04969688	0.11	0.281	0.288	0.166	0.326	0.095	0.095	0.086	0.083	0.078	0.114	0.249	0.081	0.086	0.089	0.082
cg11929643	0.016	0.112	0.055	0.022	0.088	0.017	0.007	0.064	0.01	0.035	0.006	0.102	0.011	0.009	0.015	0.008
cg12091542	0.084	0.174	0.126	0.088	0.154	0.075	0.093	0.08	0.069	0.073	0.082	0.189	0.04	0.062	0.059	0.054
cg26982544	0.038	0.278	0.148	0.04	0.193	0.038	0.056	0.06	0.044	0.068	0.045	0.165	0.09	0.087	0.041	0.048
cg01552272	0.067	0.3	0.189	0.106	0.314	0.04	0.041	0.019	0.006	0.091	0.009	0.234	0.018	0.019	0.015	0.012
cg04624110	0.103	0.36	0.276	0.124	0.369	0.052	0.06	0.039	0.007	0.12	0.008	0.276	0.025	0.023	0.009	0.015
cg23169957	0.074	0.316	0.204	0.108	0.326	0.049	0.055	0.2	0.038	0.132	0.032	0.266	0.03	0.023	0.02	0.028
cg25557432	0.031	0.226	0.093	0.042	0.201	0.016	0.019	0.094	0.004	0.048	0.004	0.219	0	0.007	0.011	0.016
cg04716990	0.022	0.202	0.063	0.028	0.162	0.011	0.013	0.123	0.004	0.048	0.004	0.174	0.013	0.006	0.009	0.009
cg06571075	0.016	0.162	0.031	0.021	0.116	0.007	0.012	0.058	0.02	0.044	0.006	0.177	0.004	0.005	0	0.006
cg18058689	0.051	0.257	0.109	0.056	0.19	0.031	0.034	0.163	0.015	0.055	0.017	0.22	0.033	0.029	0.044	0.028
cg01100912	0.021	0.137	0.063	0.02	0.106	0.015	0.019	0.076	0.006	0.041	0	0.159	0.019	0.007	0.013	0.009
cg13393978	0.015	0.11	0.032	0.021	0.073	0.013	0.015	0.075	0.007	0.042	0	0.128	0.012	0.005	0.016	0.009
cg06809544	0.079	0.284	0.169	0.11	0.277	0.065	0.069	0.122	0.086	0.095	0.072	0.275	0.07	0.065	0.086	0.079
cg26387689	0.023	0.134	0.044	0.024	0.071	0.017	0.019	0.112	0.013	0.051	0.014	0.106	0.015	0.034	0.012	0.01
cg01787285	0.161	0.401	0.038	0.06	0.092	0.209	0.044	0.077	0.021	0.14	0.116	0.136	0.374	0.145	0.041	0.033
cg16580391	0.141	0.309	0.193	0.13	0.207	0.124	0.018	0.099	0.017	0.115	0.01	0.213	0.014	0.001	0.006	0.012
cg17564775	0.039	0.178	0.101	0.04	0.165	0.026	0.026	0.106	0.011	0.035	0.017	0.131	0.016	0.008	0.02	0.013
cg24789447	0.007	0.073	0.016	0.008	0.026	0.007	0	0.104	0.007	0.036	0	0.083	0.003	0.003	0.003	0.007
cg02983950	0.014	0.047	0.353	0.021	0.175	0.009	0.027	0.111	0.046	0.099	0.021	0.161	0.001	0.004	0	0.007
cg24531022	0.005	0.037	0.249	0.01	0.054	0.007	0.034	0.115	0.006	0.041	0.009	0.156	0.018	0.017	0.012	0.007
cg14612335	0.019	0.026	0.406	0.076	0.35	0.021	0.037	0.048	0.025	0.08	0.035	0.063	0.042	0.049	0.037	0.043
cg11006267	0.004	0.007	0.286	0.012	0.193	0.006	0.049	0.054	0.135	0.034	0.061	0.091	0.001	0.032	0.007	0.007
cg18213545	0.028	0.14	0.52	0.159	0.596	0.033	0.039	0.073	0.07	0.064	0.09	0.158	0.025	0.032	0.036	0.041
cg10831212	0.023	0.217	0.805	0.376	0.815	0.028	0.04	0.022	0.051	0.082	0.068	0.212	0	0.018	0.034	0.013
cg19210276	0.048	0.22	0.761	0.237	0.793	0.049	0.105	0.143	0.039	0.116	0.011	0.192	0.056	0.043	0.047	0.03
cg05164926	0.015	0.062	0.503	0.059	0.418	0.062	0.075	0.072	0.225	0.041	0.052	0.163	0	0.003	0.002	0.004
cg12034678	0.002	0.004	0.208	0.014	0.342	0.006	0.011	0.048	0.009	0.039	0.003	0.044	0	0	0.004	0
cg21344746	0.012	0.045	0.386	0.098	0.467	0.014	0.022	0.08	0.12	0.051	0.01	0.116	0.016	0.007	0.007	0.008
cg12446199	0.025	0.024	0.627	0.453	0.643	0.028	0.053	0.07	0.008	0.144	0.012	0.129	0.026	0.022	0.041	0.063
cg17949727	0.008	0.021	0.231	0.017	0.197	0.01	0.031	0.075	0.057	0.108	0.024	0.049	0.007	0.012	0.013	0.015
cg10784030	0.055	0.065	0.197	0.058	0.194	0.059	0.072	0.111	0.091	0.133	0.059	0.093	0.065	0.054	0.047	0.071
cg05749969	0.062	0.082	0.387	0.076	0.342	0.067	0.077	0.099	0.1	0.159	0.075	0.145	0.08	0.057	0.082	0.069
cg15473346	0.007	0.021	0.435	0.397	0.372	0.008	0.04	0.15	0.017	0.061	0.088	0.039	0.008	0.002	0.001	0.003
cg06121450	0.055	0.062	0.265	0.232	0.234	0.054	0.069	0.087	0.052	0.089	0.142	0.139	0.083	0.072	0.058	0.071
cg10831212	0.023	0.217	0.805	0.376	0.815	0.028	0.04	0.022	0.051	0.082	0.068	0.212	0	0.018	0.034	0.013
cg19210276	0.048	0.22	0.761	0.237	0.793	0.049	0.105	0.143	0.039	0.116	0.011	0.192	0.056	0.043	0.047	0.03
cg22707529	0.036	0.052	0.423	0.089	0.39	0.034	0.053	0.074	0.022	0.076	0.033	0.164	0.041	0.043	0.039	0.041
cg20865323	0.031	0.032	0.278	0.051	0.255	0.028	0.036	0.059	0.019	0.065	0.028	0.103	0.033	0.033	0.04	0.033
cg24679890	0.017	0.025	0.54	0.062	0.494	0.04	0.074	0.079	0.354	0.047	0.032	0.237	0.018	0.024	0.019	0.018
cg05388840	0.008	0.049	0.421	0.084	0.487	0.02	0.089	0.061	0.103	0.041	0.058	0.205	0.01	0.005	0.005	0.008
cg21272996	0.056	0.3	0.827	0.471	0.833	0.052	0.082	0.117	0.05	0.095	0.044	0.218	0.041	0.037	0.038	0.034
cg22707529	0.036	0.052	0.423	0.089	0.39	0.034	0.053	0.074	0.022	0.076	0.033	0.164	0.041	0.043	0.039	0.041
cg20865323	0.031	0.032	0.278	0.051	0.255	0.028	0.036	0.059	0.019	0.065	0.028	0.103	0.033	0.033	0.04	0.033
cg18213545	0.028	0.14	0.52	0.159	0.596	0.033	0.039	0.073	0.07	0.064	0.09	0.158	0.025	0.032	0.036	0.041
cg10831212	0.023	0.217	0.805	0.376	0.815	0.028	0.04	0.022	0.051	0.082	0.068	0.212	0	0.018	0.034	0.013
cg12459718	0.071	0.155	0.552	0.326	0.585	0.077	0.055	0.087	0.012	0.06	0.021	0.136	0.053	0.031	0.013	0.019
cg03835987	0.035	0.073	0.57	0.141	0.589	0.042	0.117	0.068	0.025	0.189	0.029	0.227	0.045	0.092	0.044	0.044
cg15232539	0.043	0.221	0.689	0.064	0.448	0.054	0.11	0.164	0.015	0.769	0.013	0.128	0.025	0.017	0.046	0.01
cg17983217	0.031	0.053	0.445	0.038	0.198	0.034	0.054	0.183	0.146	0.782	0.043	0.102	0.061	0.076	0.077	0.105
cg00124375	0.007	0.038	0.571	0.029	0.301	0.012	0.038	0.165	0.153	0.807	0.034	0.144	0.002	0.006	0.023	0.01
cg02501827	0.014	0.181	0.701	0.152	0.707	0.017	0.057	0.229	0.058	0.322	0.022	0.205	0.011	0.122	0.028	0.053
cg12492653	0.132	0.324	0.73	0.372	0.755	0.118	0.244	0.311	0.211	0.441	0.209	0.211	0.14	0.239	0.105	0.2
cg09878888	0.04	0.193	0.547	0.185	0.597	0.04	0.085	0.061	0.031	0.07	0.031	0.218	0.044	0.037	0.031	0.043
cg12917475	0.044	0.06	0.335	0.058	0.336	0.046	0.058	0.059	0.049	0.089	0.063	0.123	0.057	0.066	0.054	0.063
cg05877109	0.044	0.05	0.346	0.058	0.346	0.043	0.061	0.056	0.037	0.079	0.028	0.114	0.052	0.035	0.047	0.04
cg25149155	0.085	0.104	0.386	0.105	0.391	0.082	0.111	0.116	0.072	0.136	0.078	0.145	0.11	0.118	0.109	0.099
cg04542489	0.025	0.051	0.214	0.043	0.216	0.028	0.04	0.055	0.028	0.086	0.077	0.053	0.05	0.054	0.039	0.035
cg17329494	0.022	0.143	0.45	0.164	0.502	0.023	0.06	0.095	0.011	0.135	0.009	0.179	0.018	0.032	0.015	0.02
cg17679824	0.005	0.031	0.085	0.018	0.131	0.006	0.022	0.126	0.015	0.094	0.01	0.005	0.015	0.01	0.01	0.012
cg12666727	0.02	0.017	0.419	0.26	0.406	0.021	0.108	0.089	0.053	0.054	0.078	0.15	0.015	0.031	0.009	0.022
cg10640944	0.03	0.048	0.221	0.028	0.078	0.029	0.027	0.116	0.018	0.05	0.014	0.154	0.026	0.03	0.041	0.018
cg09431416	0.016	0.074	0.384	0.068	0.467	0.019	0.075	0.096	0.025	0.111	0.007	0.055	0.101	0.08	0.025	0.016
cg03717364	0.026	0.167	0.507	0.137	0.515	0.03	0.102	0.053	0.112	0.438	0.01	0.286	0.027	0.041	0.012	0.012
cg04011671	0.018	0.108	0.463	0.08	0.46	0.023	0.052	0.077	0.068	0.389	0.011	0.164	0.029	0.022	0.02	0.012
cg23600866	0.049	0.155	0.383	0.134	0.356	0.051	0.041	0.097	0.019	0.079	0.041	0.142	0.042	0.007	0.032	0.029
cg18049167	0.209	0.426	0.713	0.284	0.743	0.227	0.061	0.144	0.036	0.24	0.018	0.197	0.014	0.024	0.021	0.014
cg17329164	0.12	0.267	0.502	0.169	0.548	0.12	0.031	0.11	0.019	0.14	0.026	0.1	0.006	0.002	0.011	0.014
cg14130039	0.196	0.312	0.432	0.221	0.421	0.196	0.102	0.085	0.045	0.215	0.098	0.25	0.05	0.069	0.049	0.053
cg15846482	0.059	0.162	0.484	0.113	0.62	0.066	0.063	0.071	0.039	0.063	0.042	0.173	0.046	0.04	0.045	0.038
cg14825976	0.127	0.149	0.593	0.16	0.591	0.15	0.073	0.077	0.062	0.327	0.044	0.228	0.088	0.072	0.064	0.055
cg22454011	0.17	0.177	0.645	0.17	0.621	0.199	0.114	0.121	0.062	0.502	0.046	0.178	0.159	0.078	0.065	0.055
cg25374649	0.073	0.09	0.535	0.101	0.53	0.093	0.074	0.086	0.058	0.276	0.052	0.159	0.077	0.059	0.049	0.045
cg10409248	0.003	0.029	0.124	0.009	0.102	0.004	0.007	0.072	0.065	0.029	0.014	0.056	0.004	0.014	0.002	0.01
cg10683341	0.021	0.037	0.242	0.046	0.245	0.028	0.042	0.097	0.013	0.063	0.022	0.129	0.021	0.023	0.025	0.018
cg23651614	0.04	0.046	0.235	0.084	0.235	0.039	0.055	0.068	0.037	0.074	0.041	0.099	0.044	0.04	0.059	0.052
cg10040748	0.035	0.046	0.397	0.158	0.353	0.038	0.055	0.059	0.033	0.083	0.052	0.146	0.064	0.08	0.107	0.057
cg18609578	0.04	0.092	0.391	0.078	0.32	0.047	0.079	0.188	0.031	0.089	0.032	0.125	0.057	0.065	0.052	0.057
cg14214239	0.066	0.086	0.135	0.071	0.113	0.069	0.071	0.173	0.025	0.091	0.099	0.135	0.074	0.085	0.093	0.098
cg03997390	0.06	0.084	0.249	0.074	0.215	0.056	0.071	0.123	0.052	0.126	0.077	0.126	0.078	0.02	0.068	0.069
cg25365958	0.092	0.151	0.659	0.222	0.751	0.105	0.09	0.138	0.185	0.079	0.069	0.245	0.032	0.04	0.038	0.048
cg24542714	0.051	0.144	0.546	0.298	0.504	0.06	0.065	0.078	0.042	0.178	0.026	0.201	0.035	0.1	0.054	0.07
cg09545443	0.038	0.057	0.366	0.094	0.341	0.037	0.11	0.078	0.023	0.091	0.023	0.079	0.109	0.077	0.064	0.057
cg26196531	0.103	0.271	0.607	0.294	0.612	0.105	0.094	0.182	0.12	0.152	0.272	0.236	0.108	0.106	0.104	0.093
cg00615377	0.063	0.222	0.577	0.223	0.556	0.058	0.058	0.129	0.062	0.104	0.201	0.157	0.033	0.062	0.051	0.039
cg25840538	0.052	0.21	0.564	0.159	0.583	0.07	0.111	0.116	0.06	0.103	0.055	0.198	0.061	0.082	0.067	0.056
cg05412028	0.051	0.203	0.462	0.182	0.466	0.094	0.032	0.134	0.058	0.092	0.029	0.164	0.07	0.026	0.007	0.016
cg26685941	0.093	0.224	0.415	0.201	0.377	0.151	0.076	0.148	0.166	0.095	0.104	0.219	0.067	0.058	0.025	0.043
cg23094674	0.101	0.175	0.344	0.157	0.301	0.101	0.281	0.185	0.097	0.347	0.106	0.242	0.221	0.202	0.185	0.184
cg24864241	0.073	0.114	0.539	0.202	0.439	0.073	0.173	0.105	0.038	0.239	0.048	0.169	0.078	0.047	0.047	0.066
cg08388111	0.029	0.042	0.239	0.04	0.198	0.037	0.054	0.048	0.014	0.073	0.026	0.111	0.092	0.092	0.092	0.078
cg10423113	0.012	0.018	0.127	0.021	0.096	0.017	0.007	0.062	0.017	0.05	0.031	0.045	0.022	0.018	0.021	0.013
cg19409172	0.027	0.051	0.292	0.08	0.291	0.026	0.054	0.13	0.041	0.126	0.025	0.095	0.026	0.043	0.017	0.011
cg11911122	0.032	0.044	0.371	0.057	0.385	0.033	0.091	0.086	0.031	0.253	0.042	0.117	0.035	0.042	0.045	0.048
cg12917475	0.044	0.06	0.335	0.058	0.336	0.046	0.058	0.059	0.049	0.089	0.063	0.123	0.057	0.066	0.054	0.063
cg05877109	0.044	0.05	0.346	0.058	0.346	0.043	0.061	0.056	0.037	0.079	0.028	0.114	0.052	0.035	0.047	0.04
cg25149155	0.085	0.104	0.386	0.105	0.391	0.082	0.111	0.116	0.072	0.136	0.078	0.145	0.11	0.118	0.109	0.099
cg04542489	0.025	0.051	0.214	0.043	0.216	0.028	0.04	0.055	0.028	0.086	0.077	0.053	0.05	0.054	0.039	0.035
cg18049167	0.209	0.426	0.713	0.284	0.743	0.227	0.061	0.144	0.036	0.24	0.018	0.197	0.014	0.024	0.021	0.014
cg17329164	0.12	0.267	0.502	0.169	0.548	0.12	0.031	0.11	0.019	0.14	0.026	0.1	0.006	0.002	0.011	0.014
cg14130039	0.196	0.312	0.432	0.221	0.421	0.196	0.102	0.085	0.045	0.215	0.098	0.25	0.05	0.069	0.049	0.053
cg21161394	0.031	0.072	0.548	0.461	0.551	0.044	0.075	0.093	0.024	0.488	0.017	0.199	0.018	0.011	0.04	0.079
cg02648847	0.066	0.058	0.689	0.583	0.629	0.072	0.081	0.084	0.082	0.438	0.057	0.17	0.066	0.064	0.054	0.081
cg08944236	0.039	0.117	0.531	0.077	0.564	0.052	0.123	0.063	0.043	0.328	0.071	0.267	0.077	0.058	0.061	0.054
cg23051349	0.021	0.114	0.654	0.219	0.697	0.043	0.07	0.086	0.27	0.042	0.038	0.189	0.026	0.204	0.23	0.217
cg05795313	0.041	0.122	0.418	0.184	0.418	0.025	0.046	0.068	0.034	0.147	0.165	0.148	0.037	0.073	0.031	0.042
cg07363543	0.015	0.036	0.513	0.167	0.291	0.018	0.025	0.075	0.598	0.051	0.145	0.203	0.062	0.157	0.04	0.066
cg22580629	0.03	0.053	0.304	0.047	0.382	0.033	0.057	0.08	0.06	0.06	0.077	0.157	0.027	0.033	0.035	0.031
cg16853842	0.099	0.117	0.213	0.114	0.268	0.111	0.123	0.207	0.061	0.143	0.055	0.206	0.13	0.136	0.127	0.141
cg14825976	0.127	0.149	0.593	0.16	0.591	0.15	0.073	0.077	0.062	0.327	0.044	0.228	0.088	0.072	0.064	0.055
cg25374649	0.073	0.09	0.535	0.101	0.53	0.093	0.074	0.086	0.058	0.276	0.052	0.159	0.077	0.059	0.049	0.045
cg14001992	0.065	0.103	0.576	0.166	0.474	0.058	0.128	0.215	0.057	0.518	0.04	0.167	0.085	0.05	0.064	0.032
cg24124443	0.032	0.245	0.6	0.16	0.621	0.019	0.043	0.194	0.18	0.547	0.012	0.224	0.014	0.012	0.006	0.014
cg03156769	0.032	0.083	0.264	0.051	0.203	0.035	0.053	0.103	0.051	0.09	0.038	0.089	0.089	0.041	0.032	0.032
cg03717364	0.026	0.167	0.507	0.137	0.515	0.03	0.102	0.053	0.112	0.438	0.01	0.286	0.027	0.041	0.012	0.012
cg04011671	0.018	0.108	0.463	0.08	0.46	0.023	0.052	0.077	0.068	0.389	0.011	0.164	0.029	0.022	0.02	0.012
cg26008365	0.017	0.027	0.635	0.215	0.549	0.027	0.072	0.106	0.715	0.065	0.319	0.226	0.042	0.045	0.025	0.02
cg11836119	0.036	0.181	0.353	0.143	0.385	0.028	0.03	0.091	0.011	0.221	0.011	0.101	0.044	0.021	0.044	0.037
cg00336376	0.04	0.076	0.445	0.202	0.433	0.041	0.077	0.078	0.102	0.079	0.062	0.161	0.115	0.149	0.07	0.069
cg27093546	0.134	0.256	0.57	0.244	0.575	0.137	0.126	0.152	0.364	0.131	0.069	0.226	0.076	0.1	0.089	0.067
cg07692853	0.057	0.139	0.382	0.1	0.372	0.048	0.051	0.113	0.181	0.124	0.056	0.128	0.035	0.049	0.022	0.033
cg00357551	0.136	0.451	0.793	0.489	0.845	0.151	0.102	0.127	0.058	0.116	0.098	0.339	0.079	0.049	0.024	0.069
cg12688234	0.281	0.653	0.879	0.711	0.886	0.302	0.148	0.183	0.037	0.129	0.109	0.473	0.03	0.041	0.025	0.026
cg16504019	0.041	0.173	0.383	0.163	0.388	0.043	0.073	0.084	0.063	0.072	0.059	0.133	0.061	0.061	0.053	0.059
cg12426092	0.065	0.168	0.763	0.271	0.845	0.07	0.058	0.135	0.703	0.319	0.078	0.21	0.023	0.057	0.023	0.028
cg00168785	0.05	0.108	0.416	0.099	0.407	0.052	0.061	0.096	0.061	0.076	0.064	0.146	0.063	0.174	0.094	0.121
cg21161394	0.031	0.072	0.548	0.461	0.551	0.044	0.075	0.093	0.024	0.488	0.017	0.199	0.018	0.011	0.04	0.079
cg02648847	0.066	0.058	0.689	0.583	0.629	0.072	0.081	0.084	0.082	0.438	0.057	0.17	0.066	0.064	0.054	0.081
cg22306344	0.006	0.021	0.171	0.02	0.319	0.009	0.026	0.087	0.02	0.062	0.011	0.056	0.015	0.017	0.007	0.012
cg21072795	0.048	0.42	0.772	0.72	0.77	0.101	0.153	0.08	0.205	0.067	0.093	0.249	0.062	0.053	0.04	0.054
cg24507266	0.072	0.218	0.461	0.185	0.533	0.11	0.112	0.111	0.057	0.031	0.028	0.316	0.02	0.026	0.021	0.024
cg17949727	0.008	0.021	0.231	0.017	0.197	0.01	0.031	0.075	0.057	0.108	0.024	0.049	0.007	0.012	0.013	0.015
cg02309273	0.047	0.053	0.283	0.064	0.267	0.046	0.066	0.069	0.081	0.112	0.036	0.126	0.055	0.06	0.057	0.075
cg10784030	0.055	0.065	0.197	0.058	0.194	0.059	0.072	0.111	0.091	0.133	0.059	0.093	0.065	0.054	0.047	0.071
cg05749969	0.062	0.082	0.387	0.076	0.342	0.067	0.077	0.099	0.1	0.159	0.075	0.145	0.08	0.057	0.082	0.069
cg06092729	0.044	0.047	0.287	0.058	0.26	0.044	0.056	0.066	0.058	0.097	0.075	0.092	0.079	0.076	0.054	0.061
cg25011475	0.035	0.103	0.297	0.101	0.364	0.034	0.052	0.153	0.027	0.08	0.059	0.147	0	0.023	0.012	0.027
cg07330114	0.052	0.168	0.466	0.274	0.484	0.042	0.058	0.128	0.057	0.111	0.056	0.186	0.094	0.09	0.047	0.061
cg22240533	0.046	0.042	0.252	0.048	0.148	0.032	0.068	0.121	0.029	0.209	0.026	0.073	0.039	0.048	0.047	0.056
cg12917475	0.044	0.06	0.335	0.058	0.336	0.046	0.058	0.059	0.049	0.089	0.063	0.123	0.057	0.066	0.054	0.063
cg05877109	0.044	0.05	0.346	0.058	0.346	0.043	0.061	0.056	0.037	0.079	0.028	0.114	0.052	0.035	0.047	0.04
cg25149155	0.085	0.104	0.386	0.105	0.391	0.082	0.111	0.116	0.072	0.136	0.078	0.145	0.11	0.118	0.109	0.099
cg04542489	0.025	0.051	0.214	0.043	0.216	0.028	0.04	0.055	0.028	0.086	0.077	0.053	0.05	0.054	0.039	0.035
cg24442740	0.015	0.136	0.374	0.29	0.545	0.018	0.049	0.084	0.011	0.031	0.01	0.247	0.009	0.032	0.019	0.044
cg14101485	0.057	0.239	0.865	0.401	0.896	0.102	0.553	0.136	0.559	0.073	0.063	0.263	0.039	0.04	0.073	0.068
cg10688516	0.08	0.171	0.439	0.236	0.47	0.104	0.407	0.074	0.451	0.125	0.186	0.23	0.088	0.125	0.139	0.116
cg15999165	0.053	0.188	0.507	0.115	0.441	0.081	0.104	0.075	0.054	0.073	0.235	0.2	0.072	0.192	0.102	0.106
cg25040783	0.051	0.064	0.342	0.136	0.401	0.054	0.072	0.105	0.036	0.092	0.044	0.123	0.071	0.064	0.045	0.054
cg22948808	0.057	0.234	0.817	0.529	0.857	0.157	0.143	0.25	0.078	0.234	0.337	0.238	0.085	0.062	0.062	0.048
cg08903019	0.061	0.185	0.491	0.155	0.611	0.067	0.077	0.085	0.053	0.074	0.071	0.191	0.098	0.157	0.068	0.076
cg22018051	0.071	0.483	0.709	0.487	0.802	0.164	0.089	0.082	0.043	0.081	0.22	0.262	0.026	0.049	0.036	0.04
cg04995846	0.055	0.218	0.322	0.222	0.403	0.073	0.086	0.077	0.065	0.082	0.081	0.19	0.061	0.069	0.076	0.077
cg26719831	0.066	0.162	0.588	0.197	0.467	0.078	0.117	0.102	0.39	0.093	0.123	0.235	0.09	0.104	0.102	0.109
cg24445316	0.055	0.096	0.389	0.073	0.389	0.055	0.087	0.066	0.233	0.084	0.062	0.192	0.051	0.057	0.05	0.063
cg27557428	0.017	0.181	0.293	0.155	0.263	0.016	0.023	0.081	0.089	0.039	0.029	0.102	0.025	0.161	0.013	0.024
cg15785898	0.064	0.207	0.621	0.334	0.637	0.066	0.095	0.129	0.313	0.117	0.17	0.181	0.087	0.049	0.071	0.066
cg04406436	0.032	0.086	0.344	0.04	0.219	0.032	0.027	0.074	0.104	0.545	0.051	0.174	0.013	0.017	0.016	0.005
cg00349895	0.013	0.018	0.284	0.039	0.207	0.02	0.123	0.265	0.005	0.284	0.035	0.1	0.018	0.022	0.022	0.02
cg01022974	0.01	0.015	0.316	0.036	0.252	0.013	0.151	0.348	0.006	0.396	0.027	0.117	0.011	0.018	0.01	0.006
cg19903071	0.049	0.18	0.59	0.236	0.653	0.046	0.081	0.145	0.428	0.221	0.064	0.194	0.043	0.043	0.036	0.056
cg27653384	0.259	0.515	0.8	0.192	0.616	0.262	0.066	0.151	0.134	0.138	0.027	0.45	0.385	0.134	0.02	0.015
cg14846965	0.154	0.184	0.562	0.205	0.559	0.17	0.161	0.151	0.072	0.445	0.103	0.226	0.3	0.154	0.118	0.112
cg22454011	0.17	0.177	0.645	0.17	0.621	0.199	0.114	0.121	0.062	0.502	0.046	0.178	0.159	0.078	0.065	0.055
cg25374649	0.073	0.09	0.535	0.101	0.53	0.093	0.074	0.086	0.058	0.276	0.052	0.159	0.077	0.059	0.049	0.045
cg15056105	0.111	0.122	0.435	0.142	0.445	0.115	0.115	0.092	0.071	0.321	0.064	0.189	0.165	0.103	0.088	0.077
cg16597406	0.136	0.23	0.588	0.433	0.621	0.131	0.087	0.075	0.071	0.094	0.134	0.186	0.097	0.067	0.055	0.064
cg16015423	0.018	0.159	0.267	0.073	0.323	0.017	0.034	0.076	0.069	0.026	0.017	0.226	0.01	0.044	0.022	0.01
cg17765751	0.018	0.09	0.105	0.033	0.142	0.016	0.016	0.063	0.028	0.046	0.022	0.124	0.021	0.02	0.021	0.009
cg09942999	0.087	0.156	0.55	0.231	0.535	0.07	0.067	0.066	0.23	0.06	0.064	0.227	0.166	0.182	0.078	0.105
cg10421247	0.049	0.228	0.465	0.298	0.479	0.068	0.05	0.098	0.02	0.05	0.036	0.153	0.145	0.149	0.08	0.062
cg16208357	0.017	0.046	0.101	0.027	0.141	0.015	0.021	0.079	0.013	0.158	0.013	0.097	0.017	0.011	0.015	0.01
cg24104567	0.02	0.045	0.192	0.027	0.262	0.017	0.025	0.1	0.007	0.181	0	0.094	0.016	0.003	0.007	0.009
cg16256390	0.091	0.174	0.099	0.393	0.172	0.086	0.081	0.281	0.078	0.554	0.111	0.205	0.068	0.098	0.086	0.089
cg27043010	0.021	0.053	0.037	0.354	0.072	0.027	0.018	0.166	0.02	0.441	0.01	0.084	0.007	0.01	0.009	0.006
cg15473346	0.007	0.021	0.435	0.397	0.372	0.008	0.04	0.15	0.017	0.061	0.088	0.039	0.008	0.002	0.001	0.003
cg06121450	0.055	0.062	0.265	0.232	0.234	0.054	0.069	0.087	0.052	0.089	0.142	0.139	0.083	0.072	0.058	0.071
cg23917399	0.069	0.069	0.189	0.463	0.271	0.096	0.05	0.074	0.138	0.112	0.098	0.119	0.061	0.051	0.058	0.059
cg08635931	0.023	0.044	0.076	0.329	0.173	0.027	0.054	0.075	0.022	0.121	0.109	0.071	0.082	0.107	0.067	0.064
cg01088404	0.051	0.196	0.491	0.717	0.777	0.044	0.091	0.122	0.063	0.096	0.138	0.149	0.062	0.123	0.053	0.066
cg03989617	0.086	0.137	0.19	0.572	0.322	0.088	0.104	0.097	0.156	0.115	0.146	0.172	0.16	0.234	0.105	0.15
cg23243080	0.033	0.043	0.091	0.259	0.095	0.032	0.029	0.12	0.09	0.074	0.05	0.067	0.133	0	0.124	0.058
cg20369204	0.06	0.098	0.119	0.345	0.287	0.059	0.078	0.07	0.07	0.123	0.053	0.157	0.066	0.069	0.066	0.062
cg06688396	0.062	0.138	0.136	0.37	0.33	0.058	0.106	0.076	0.149	0.187	0.098	0.148	0.065	0.079	0.069	0.064
cg20826740	0.115	0.105	0.305	0.567	0.338	0.133	0.248	0.326	0.053	0.211	0.083	0.165	0.052	0.112	0.056	0.082
cg09592244	0.111	0.079	0.302	0.499	0.29	0.14	0.217	0.231	0.047	0.193	0.102	0.152	0.039	0.07	0.064	0.064
cg20826740	0.115	0.105	0.305	0.567	0.338	0.133	0.248	0.326	0.053	0.211	0.083	0.165	0.052	0.112	0.056	0.082
cg09592244	0.111	0.079	0.302	0.499	0.29	0.14	0.217	0.231	0.047	0.193	0.102	0.152	0.039	0.07	0.064	0.064
cg12446199	0.025	0.024	0.627	0.453	0.643	0.028	0.053	0.07	0.008	0.144	0.012	0.129	0.026	0.022	0.041	0.063
cg03743205	0.113	0.095	0.235	0.463	0.217	0.115	0.216	0.108	0.061	0.405	0.075	0.087	0.048	0.074	0.077	0.069
cg18660064	0.058	0.161	0.433	0.471	0.513	0.054	0.081	0.087	0.058	0.104	0.036	0.198	0.055	0.084	0.056	0.054
cg05406868	0.039	0.153	0.111	0.27	0.157	0.068	0.058	0.084	0.034	0.071	0.039	0.14	0.061	0.062	0.058	0.038
cg21072795	0.048	0.42	0.772	0.72	0.77	0.101	0.153	0.08	0.205	0.067	0.093	0.249	0.062	0.053	0.04	0.054
cg24011261	0.014	0.106	0.119	0.269	0.19	0.023	0.035	0.058	0.184	0.063	0.148	0.102	0.03	0.053	0.029	0.035
cg05551922	0.032	0.128	0.135	0.222	0.191	0.038	0.028	0.086	0.093	0.058	0.047	0.124	0.048	0.064	0.057	0.026
cg05055782	0.068	0.182	0.235	0.357	0.269	0.086	0.078	0.114	0.203	0.106	0.245	0.158	0.143	0.192	0.134	0.136
cg18584387	0.028	0.086	0.056	0.332	0.072	0.032	0.095	0.194	0.039	0.515	0.134	0.064	0.042	0.052	0.03	0.045
cg07066369	0.009	0.057	0.035	0.196	0.047	0.012	0.056	0.087	0.006	0.555	0.057	0.041	0.028	0.042	0.035	0.039
cg17580045	0.058	0.111	0.082	0.247	0.101	0.067	0.131	0.144	0.055	0.508	0.194	0.126	0.083	0.087	0.088	0.078
cg19323951	0.022	0.032	0.083	0.362	0.087	0.024	0.034	0.076	0.656	0.212	0.09	0.112	0.045	0.065	0.046	0.044
cg09802389	0.033	0.087	0.159	0.269	0.242	0.038	0.031	0.062	0.129	0.089	0.106	0.069	0.023	0.07	0.021	0.053
cg05783185	0.043	0.295	0.661	0.656	0.747	0.052	0.089	0.136	0.05	0.103	0.368	0.189	0.086	0.031	0.072	0.037
cg05047486	0.046	0.075	0.134	0.244	0.248	0.047	0.044	0.071	0.04	0.068	0.047	0.091	0.047	0.056	0.051	0.041
cg21161394	0.031	0.072	0.548	0.461	0.551	0.044	0.075	0.093	0.024	0.488	0.017	0.199	0.018	0.011	0.04	0.079
cg02648847	0.066	0.058	0.689	0.583	0.629	0.072	0.081	0.084	0.082	0.438	0.057	0.17	0.066	0.064	0.054	0.081
cg01447281	0.051	0.182	0.083	0.563	0.222	0.043	0.055	0.161	0.08	0.199	0.129	0.124	0.656	0.369	0.106	0.16
cg02256631	0.112	0.084	0.165	0.409	0.128	0.115	0.077	0.248	0.067	0.332	0.094	0.13	0.066	0.146	0.07	0.07
cg03434029	0.145	0.331	0.284	0.559	0.394	0.143	0.077	0.082	0.175	0.108	0.081	0.237	0.207	0.169	0.093	0.106
cg26971042	0.09	0.059	0.105	0.67	0.19	0.108	0.108	0.1	0.236	0.42	0.742	0.133	0.095	0.29	0.308	0.198
cg20369204	0.06	0.098	0.119	0.345	0.287	0.059	0.078	0.07	0.07	0.123	0.053	0.157	0.066	0.069	0.066	0.062
cg06688396	0.062	0.138	0.136	0.37	0.33	0.058	0.106	0.076	0.149	0.187	0.098	0.148	0.065	0.079	0.069	0.064
cg07687131	0.025	0.046	0.434	0.711	0.483	0.026	0.085	0.308	0.085	0.686	0.815	0.139	0.018	0.073	0.079	0.084
cg02676175	0.371	0.532	0.523	0.703	0.379	0.541	0.094	0.185	0.09	0.062	0.046	0.4	0.027	0.037	0.039	0.027
cg07392085	0.045	0.127	0.066	0.347	0.146	0.044	0.082	0.124	0.038	0.19	0.061	0.12	0.34	0.133	0.094	0.058
cg15832662	0.12	0.416	0.482	0.538	0.413	0.078	0.16	0.179	0.025	0.118	0.041	0.274	0.447	0.13	0.065	0.031
cg04111435	0.058	0.381	0.477	0.556	0.439	0.056	0.111	0.136	0.049	0.154	0.054	0.198	0.327	0.097	0.067	0.067
cg13315450	0.096	0.073	0.084	0.458	0.081	0.068	0.101	0.113	0.209	0.191	0.165	0.121	0.413	0.263	0.102	0.14
cg13357602	0.04	0.039	0.367	0.335	0.623	0.104	0.03	0.064	0.007	0.038	0.062	0.106	0.033	0.047	0.032	0.03
cg10708955	0.055	0.354	0.309	0.343	0.368	0.061	0.08	0.147	0.032	0.165	0.058	0.216	0.425	0.069	0.033	0.046
cg04658021	0.107	0.657	0.514	0.788	0.599	0.146	0.121	0.246	0.054	0.236	0.076	0.272	0.611	0.172	0.076	0.034
cg13759852	0.056	0.268	0.218	0.383	0.237	0.065	0.067	0.094	0.059	0.082	0.045	0.189	0.259	0.095	0.073	0.069
cg16277214	0.045	0.077	0.071	0.466	0.172	0.055	0.085	0.141	0.57	0.102	0.221	0.1	0.131	0.257	0.122	0.157
cg19163395	0.883	0.857	0.129	0.868	0.174	0.924	0.323	0.171	0.016	0.044	0.025	0.634	0.03	0.069	0	0.025
cg06857094	0.516	0.525	0.326	0.668	0.358	0.379	0.345	0.274	0.14	0.161	0.206	0.472	0.305	0.263	0.117	0.115
cg11073255	0.149	0.193	0.151	0.378	0.174	0.089	0.166	0.135	0.065	0.121	0.162	0.182	0.11	0.072	0.048	0.061
cg02205391	0.3	0.36	0.209	0.422	0.246	0.205	0.197	0.148	0.059	0.139	0.093	0.335	0.178	0.134	0.091	0.083
cg21161394	0.031	0.072	0.548	0.461	0.551	0.044	0.075	0.093	0.024	0.488	0.017	0.199	0.018	0.011	0.04	0.079
cg02648847	0.066	0.058	0.689	0.583	0.629	0.072	0.081	0.084	0.082	0.438	0.057	0.17	0.066	0.064	0.054	0.081
cg10708955	0.055	0.354	0.309	0.343	0.368	0.061	0.08	0.147	0.032	0.165	0.058	0.216	0.425	0.069	0.033	0.046
cg04658021	0.107	0.657	0.514	0.788	0.599	0.146	0.121	0.246	0.054	0.236	0.076	0.272	0.611	0.172	0.076	0.034
cg13759852	0.056	0.268	0.218	0.383	0.237	0.065	0.067	0.094	0.059	0.082	0.045	0.189	0.259	0.095	0.073	0.069
cg19286686	0.036	0.08	0.092	0.096	0.208	0.042	0.046	0.07	0.032	0.071	0.06	0.093	0.045	0.072	0.04	0.038
cg23967461	0.03	0.129	0.159	0.254	0.353	0.035	0.027	0.075	0.021	0.057	0.05	0.12	0.06	0.091	0.033	0.029
cg22093121	0.347	0.048	0.504	0.677	0.537	0.428	0.117	0.122	0.215	0.143	0.051	0.345	0.27	0.155	0.049	0.083
cg20078972	0.056	0.887	0.871	0.857	0.885	0.039	0.126	0.107	0.041	0.161	0.038	0.314	0.511	0.218	0.104	0.029
cg00066663	0.078	0.407	0.283	0.531	0.366	0.079	0.096	0.122	0.174	0.098	0.097	0.246	0.19	0.279	0.096	0.113
cg12871687	0.089	0.125	0.208	0.302	0.222	0.075	0.066	0.127	0.115	0.129	0.054	0.129	0.074	0.045	0.053	0.039
cg24011261	0.014	0.106	0.119	0.269	0.19	0.023	0.035	0.058	0.184	0.063	0.148	0.102	0.03	0.053	0.029	0.035
cg05551922	0.032	0.128	0.135	0.222	0.191	0.038	0.028	0.086	0.093	0.058	0.047	0.124	0.048	0.064	0.057	0.026
cg05055782	0.068	0.182	0.235	0.357	0.269	0.086	0.078	0.114	0.203	0.106	0.245	0.158	0.143	0.192	0.134	0.136
cg05389236	0.122	0.178	0.929	0.94	0.953	0.266	0.558	0.135	0.709	0.09	0.102	0.416	0.064	0.121	0.086	0.156
cg01664727	0.156	0.378	0.481	0.556	0.659	0.205	0.079	0.244	0.097	0.11	0.182	0.178	0.021	0.039	0.055	0.038
cg19092837	0.302	0.842	0.88	0.844	0.896	0.126	0.13	0.173	0.09	0.13	0.095	0.468	0.079	0.055	0.087	0.083
cg24691069	0.008	0.028	0.094	0.146	0.216	0.009	0.032	0.103	0.01	0.109	0.041	0.051	0.011	0.012	0.021	0.034
cg22501342	0.053	0.092	0.229	0.325	0.377	0.06	0.121	0.115	0.066	0.104	0.206	0.094	0.056	0.064	0.068	0.082
cg23924887	0.052	0.078	0.122	0.158	0.171	0.057	0.073	0.071	0.065	0.092	0.077	0.102	0.087	0.082	0.088	0.089
cg20744437	0.042	0.061	0.122	0.207	0.166	0.049	0.043	0.076	0.044	0.093	0.045	0.111	0.061	0.076	0.056	0.054
cg01616225	0.061	0.101	0.187	0.331	0.246	0.063	0.091	0.109	0.134	0.087	0.096	0.148	0.119	0.156	0.083	0.088
cg02012974	0.07	0.878	0.876	0.862	0.89	0.057	0.093	0.093	0.363	0.066	0.214	0.373	0.272	0.229	0.064	0.073
cg23655651	0.173	0.87	0.853	0.844	0.868	0.556	0.132	0.104	0.209	0.069	0.068	0.419	0.076	0.072	0.036	0.078
cg03173722	0.288	0.432	0.403	0.559	0.496	0.461	0.121	0.129	0.031	0.095	0.062	0.312	0.123	0.035	0.039	0.031
cg09046309	0.171	0.713	0.844	0.754	0.854	0.045	0.072	0.13	0.12	0.14	0.175	0.263	0.13	0.158	0.141	0.175
cg00901982	0.069	0.575	0.658	0.746	0.796	0.053	0.093	0.087	0.057	0.453	0.042	0.279	0.203	0.194	0.292	0.244
cg01870865	0.045	0.488	0.788	0.646	0.822	0.134	0.078	0.068	0.241	0.065	0.053	0.233	0.101	0.146	0.077	0.206
cg24691069	0.008	0.028	0.094	0.146	0.216	0.009	0.032	0.103	0.01	0.109	0.041	0.051	0.011	0.012	0.021	0.034
cg22501342	0.053	0.092	0.229	0.325	0.377	0.06	0.121	0.115	0.066	0.104	0.206	0.094	0.056	0.064	0.068	0.082
cg08884752	0.716	0.829	0.123	0.849	0.418	0.761	0.162	0.147	0.047	0.085	0.254	0.49	0.258	0.207	0.091	0.077
cg26551200	0.462	0.583	0.906	0.87	0.939	0.277	0.168	0.129	0.39	0.06	0.068	0.527	0.157	0.065	0.023	0.053
cg15832662	0.12	0.416	0.482	0.538	0.413	0.078	0.16	0.179	0.025	0.118	0.041	0.274	0.447	0.13	0.065	0.031
cg04111435	0.058	0.381	0.477	0.556	0.439	0.056	0.111	0.136	0.049	0.154	0.054	0.198	0.327	0.097	0.067	0.067
cg22249612	0.278	0.925	0.93	0.751	0.932	0.104	0.046	0.094	0.092	0.042	0.152	0.292	0.034	0.174	0.033	0.056
cg00252813	0.057	0.24	0.349	0.376	0.382	0.05	0.072	0.094	0.13	0.068	0.051	0.195	0.108	0.12	0.091	0.098
cg15350627	0.058	0.225	0.409	0.372	0.432	0.049	0.114	0.14	0.22	0.085	0.093	0.154	0.161	0.178	0.106	0.108
cg23643435	0.057	0.099	0.079	0.308	0.137	0.037	0.013	0.069	0.376	0.538	0.074	0.13	0.031	0.022	0.046	0.019
cg05604112	0.041	0.055	0.054	0.216	0.082	0.04	0.057	0.085	0.27	0.503	0.072	0.078	0.028	0.036	0.039	0.045
cg24442740	0.015	0.136	0.374	0.29	0.545	0.018	0.049	0.084	0.011	0.031	0.01	0.247	0.009	0.032	0.019	0.044
cg23664926	0.342	0.381	0.518	0.535	0.529	0.305	0.081	0.114	0.068	0.067	0.076	0.37	0.039	0.039	0.034	0.041
cg00233028	0.335	0.413	0.543	0.529	0.573	0.252	0.051	0.085	0.023	0.277	0.011	0.388	0.036	0.021	0.027	0.023
cg16779839	0.156	0.337	0.222	0.395	0.244	0.215	0.047	0.14	0.016	0.052	0.422	0.186	0.026	0.055	0.077	0.032
cg11639950	0.315	0.639	0.914	0.893	0.927	0.532	0.161	0.228	0.032	0.061	0.034	0.466	0.518	0.146	0.026	0.028
cg17187521	0.094	0.349	0.699	0.575	0.757	0.134	0.125	0.126	0.065	0.087	0.048	0.277	0.436	0.094	0.041	0.04
cg27534520	0.094	0.315	0.665	0.527	0.636	0.079	0.108	0.132	0.313	0.069	0.075	0.276	0.053	0.045	0.052	0.057
cg09469355	0.422	0.583	0.229	0.661	0.451	0.473	0.151	0.138	0.084	0.118	0.135	0.365	0.215	0.145	0.104	0.108
cg18584387	0.028	0.086	0.056	0.332	0.072	0.032	0.095	0.194	0.039	0.515	0.134	0.064	0.042	0.052	0.03	0.045
cg07066369	0.009	0.057	0.035	0.196	0.047	0.012	0.056	0.087	0.006	0.555	0.057	0.041	0.028	0.042	0.035	0.039
cg17580045	0.058	0.111	0.082	0.247	0.101	0.067	0.131	0.144	0.055	0.508	0.194	0.126	0.083	0.087	0.088	0.078
cg02105691	0.049	0.06	0.178	0.213	0.24	0.05	0.057	0.106	0.031	0.081	0.04	0.09	0.063	0.057	0.062	0.047
cg22820108	0.186	0.422	0.832	0.75	0.847	0.258	0.151	0.132	0.081	0.082	0.08	0.316	0.507	0.169	0.111	0.103
cg03974193	0.781	0.723	0.282	0.832	0.368	0.821	0.194	0.252	0.105	0.195	0.053	0.724	0.087	0.066	0.047	0.056
cg12666727	0.02	0.017	0.419	0.26	0.406	0.021	0.108	0.089	0.053	0.054	0.078	0.15	0.015	0.031	0.009	0.022
cg23903252	0.138	0.368	0.437	0.45	0.613	0.14	0.098	0.097	0.057	0.148	0.07	0.27	0.388	0.268	0.122	0.111
cg00753630	0.08	0.143	0.157	0.154	0.267	0.075	0.098	0.096	0.058	0.124	0.059	0.151	0.098	0.095	0.085	0.088
cg27527018	0.089	0.248	0.356	0.345	0.514	0.102	0.064	0.093	0.032	0.091	0.031	0.25	0.104	0.075	0.051	0.047
cg06961439	0.102	0.221	0.314	0.363	0.498	0.087	0.072	0.106	0.046	0.096	0.051	0.239	0.086	0.062	0.055	0.044
cg02160608	0.313	0.396	0.856	0.697	0.873	0.349	0.274	0.153	0.011	0.07	0.247	0.431	0.001	0.007	0.011	0.004
cg04193065	0.26	0.638	0.678	0.778	0.638	0.646	0.135	0.087	0.029	0.112	0.046	0.227	0.569	0.335	0.029	0.063
cg23664926	0.342	0.381	0.518	0.535	0.529	0.305	0.081	0.114	0.068	0.067	0.076	0.37	0.039	0.039	0.034	0.041
cg00233028	0.335	0.413	0.543	0.529	0.573	0.252	0.051	0.085	0.023	0.277	0.011	0.388	0.036	0.021	0.027	0.023
cg10469774	0.525	0.58	0.661	0.646	0.633	0.456	0.144	0.199	0.082	0.382	0.091	0.535	0.116	0.23	0.149	0.148
cg16256390	0.091	0.174	0.099	0.393	0.172	0.086	0.081	0.281	0.078	0.554	0.111	0.205	0.068	0.098	0.086	0.089
cg27043010	0.021	0.053	0.037	0.354	0.072	0.027	0.018	0.166	0.02	0.441	0.01	0.084	0.007	0.01	0.009	0.006
cg05766251	0.086	0.134	0.321	0.474	0.458	0.101	0.184	0.116	0.178	0.112	0.256	0.182	0.095	0.225	0.124	0.165
cg06636541	0.412	0.55	0.366	0.671	0.401	0.471	0.11	0.224	0.011	0.071	0.634	0.385	0.038	0.09	0.07	0.055
cg02153855	0.084	0.66	0.592	0.633	0.594	0.293	0.217	0.083	0.269	0.171	0.077	0.294	0.057	0.128	0.056	0.092
cg06381803	0.574	0.589	0.567	0.852	0.586	0.452	0.112	0.466	0.088	0.567	0.04	0.502	0.028	0.148	0.117	0.107
cg00464814	0.141	0.457	0.427	0.521	0.353	0.082	0.137	0.297	0.054	0.426	0.158	0.251	0.031	0.052	0.094	0.07
cg20518511	0.084	0.246	0.2	0.316	0.219	0.12	0.067	0.108	0.046	0.074	0.044	0.2	0.098	0.161	0.108	0.065
cg16449084	0.101	0.789	0.801	0.792	0.839	0.075	0.365	0.194	0.133	0.372	0.072	0.406	0.102	0.111	0.124	0.128
cg10923838	0.265	0.525	0.564	0.528	0.561	0.312	0.068	0.086	0.046	0.105	0.064	0.354	0.021	0.03	0.04	0.032
cg25223634	0.29	0.753	0.458	0.622	0.484	0.343	0.098	0.126	0.144	0.102	0.097	0.435	0.055	0.11	0.045	0.095
cg03780927	0.167	0.539	0.504	0.619	0.442	0.187	0.174	0.135	0.325	0.049	0.056	0.367	0.059	0.424	0.086	0.108
cg08774368	0.014	0.014	0.015	0.087	0.013	0.018	0.018	0.131	0.014	0.115	0.03	0.086	0.013	0.005	0.007	0.019
cg11639950	0.315	0.639	0.914	0.893	0.927	0.532	0.161	0.228	0.032	0.061	0.034	0.466	0.518	0.146	0.026	0.028
cg17187521	0.094	0.349	0.699	0.575	0.757	0.134	0.125	0.126	0.065	0.087	0.048	0.277	0.436	0.094	0.041	0.04
cg13100962	0.164	0.765	0.733	0.755	0.72	0.247	0.051	0.158	0.174	0.1	0.075	0.312	0.464	0.388	0.034	0.054
cg06400428	0.026	0.143	0.173	0.201	0.164	0.012	0.059	0.125	0.094	0.15	0.034	0.153	0.003	0.017	0.012	0.016
cg24503796	0.082	0.194	0.2	0.226	0.217	0.058	0.106	0.101	0.149	0.213	0.074	0.24	0.05	0.06	0.06	0.061
cg25104397	0.071	0.371	0.481	0.446	0.485	0.078	0.096	0.075	0.109	0.071	0.049	0.277	0.177	0.117	0.077	0.087
cg23247968	0.107	0.312	0.38	0.366	0.398	0.112	0.126	0.114	0.137	0.098	0.088	0.287	0.2	0.13	0.104	0.11
cg07925670	0.308	0.417	0.567	0.583	0.465	0.389	0.158	0.093	0.186	0.151	0.099	0.364	0.057	0.059	0.062	0.056
cg05948411	0.147	0.354	0.701	0.606	0.725	0.217	0.187	0.13	0.069	0.082	0.068	0.323	0.257	0.125	0.093	0.089
cg17766305	0.048	0.173	0.554	0.838	0.641	0.078	0.349	0.386	0.038	0.886	0.505	0.216	0.513	0.296	0.143	0.108
cg13522882	0.856	0.629	0.235	0.716	0.335	0.866	0.146	0.08	0.066	0.079	0.039	0.682	0.073	0.058	0.041	0.034
cg00357551	0.136	0.451	0.793	0.489	0.845	0.151	0.102	0.127	0.058	0.116	0.098	0.339	0.079	0.049	0.024	0.069
cg12688234	0.281	0.653	0.879	0.711	0.886	0.302	0.148	0.183	0.037	0.129	0.109	0.473	0.03	0.041	0.025	0.026
cg12034678	0.002	0.004	0.208	0.014	0.342	0.006	0.011	0.048	0.009	0.039	0.003	0.044	0	0	0.004	0
cg24235581	0.009	0.011	0.033	0.028	0.247	0.008	0.033	0.059	0.009	0.044	0.013	0.096	0.012	0.015	0.006	0.009
cg22306344	0.006	0.021	0.171	0.02	0.319	0.009	0.026	0.087	0.02	0.062	0.011	0.056	0.015	0.017	0.007	0.012
cg08360820	0.021	0.015	0.227	0.08	0.505	0.019	0.008	0.198	0.023	0.159	0	0.037	0.006	0	0.049	0.015
cg20300175	0.013	0.052	0.182	0.135	0.319	0.012	0.025	0.091	0.014	0.024	0.005	0.127	0.006	0.016	0.009	0.009
cg16755500	0.013	0.026	0.187	0.104	0.345	0.015	0.03	0.04	0.007	0.046	0.01	0.103	0.014	0.036	0.026	0.023
cg05041073	0.009	0.015	0.118	0.029	0.259	0.011	0.027	0.087	0.023	0.104	0.006	0.035	0.005	0.018	0.027	0.017
cg21936280	0.072	0.123	0.366	0.186	0.471	0.078	0.155	0.094	0.244	0.263	0.172	0.204	0.117	0.115	0.118	0.122
cg21344746	0.012	0.045	0.386	0.098	0.467	0.014	0.022	0.08	0.12	0.051	0.01	0.116	0.016	0.007	0.007	0.008
cg17772171	0.015	0.064	0.239	0.072	0.457	0.018	0.054	0.096	0.058	0.035	0.022	0.249	0.014	0.011	0.014	0.017
cg13357602	0.04	0.039	0.367	0.335	0.623	0.104	0.03	0.064	0.007	0.038	0.062	0.106	0.033	0.047	0.032	0.03
cg20243351	0.003	0.006	0.063	0.05	0.302	0.006	0.051	0.111	0.008	0.325	0.002	0.011	0.002	0.012	0.014	0.004
cg12537925	0.008	0.012	0.022	0.035	0.134	0.01	0.03	0.117	0.002	0.317	0.011	0.032	0.001	0.011	0.014	0.006
cg05768702	0.016	0.017	0.068	0.068	0.217	0.023	0.053	0.171	0.022	0.348	0.005	0.034	0.03	0.042	0.024	0.029
cg22620363	0.013	0.057	0.183	0.059	0.424	0.016	0.037	0.051	0.022	0.317	0.067	0.096	0	0.006	0.01	0.015
cg20300175	0.013	0.052	0.182	0.135	0.319	0.012	0.025	0.091	0.014	0.024	0.005	0.127	0.006	0.016	0.009	0.009
cg16755500	0.013	0.026	0.187	0.104	0.345	0.015	0.03	0.04	0.007	0.046	0.01	0.103	0.014	0.036	0.026	0.023
cg02971575	0.006	0.051	0.123	0.013	0.199	0.003	0.026	0.08	0.003	0.068	0.001	0.07	0.016	0.002	0.003	0
cg11411904	0.016	0.027	0.083	0.08	0.211	0.016	0.014	0.061	0.034	0.055	0.007	0.028	0.023	0.013	0.022	0.016
cg05388840	0.008	0.049	0.421	0.084	0.487	0.02	0.089	0.061	0.103	0.041	0.058	0.205	0.01	0.005	0.005	0.008
cg15846482	0.059	0.162	0.484	0.113	0.62	0.066	0.063	0.071	0.039	0.063	0.042	0.173	0.046	0.04	0.045	0.038
cg18213545	0.028	0.14	0.52	0.159	0.596	0.033	0.039	0.073	0.07	0.064	0.09	0.158	0.025	0.032	0.036	0.041
cg10831212	0.023	0.217	0.805	0.376	0.815	0.028	0.04	0.022	0.051	0.082	0.068	0.212	0	0.018	0.034	0.013
cg19210276	0.048	0.22	0.761	0.237	0.793	0.049	0.105	0.143	0.039	0.116	0.011	0.192	0.056	0.043	0.047	0.03
cg09431416	0.016	0.074	0.384	0.068	0.467	0.019	0.075	0.096	0.025	0.111	0.007	0.055	0.101	0.08	0.025	0.016
cg24442740	0.015	0.136	0.374	0.29	0.545	0.018	0.049	0.084	0.011	0.031	0.01	0.247	0.009	0.032	0.019	0.044
cg18213545	0.028	0.14	0.52	0.159	0.596	0.033	0.039	0.073	0.07	0.064	0.09	0.158	0.025	0.032	0.036	0.041
cg10831212	0.023	0.217	0.805	0.376	0.815	0.028	0.04	0.022	0.051	0.082	0.068	0.212	0	0.018	0.034	0.013
cg12894649	0.025	0.2	0.065	0.053	0.239	0.011	0.029	0.104	0.005	0.043	0.01	0.172	0.02	0.007	0.001	0.018
cg23944804	0.018	0.205	0.061	0.042	0.281	0.01	0.026	0.106	0.002	0.032	0.002	0.186	0.011	0	0.01	0.007
cg14603345	0.021	0.233	0.081	0.056	0.296	0.01	0.039	0.093	0.002	0.029	0	0.195	0.014	0.009	0.008	0.01
cg10831212	0.023	0.217	0.805	0.376	0.815	0.028	0.04	0.022	0.051	0.082	0.068	0.212	0	0.018	0.034	0.013
cg19210276	0.048	0.22	0.761	0.237	0.793	0.049	0.105	0.143	0.039	0.116	0.011	0.192	0.056	0.043	0.047	0.03
cg15050390	0.019	0.063	0.086	0.038	0.227	0.02	0.03	0.097	0.012	0.042	0	0.112	0.011	0.025	0.032	0.016
cg12446199	0.025	0.024	0.627	0.453	0.643	0.028	0.053	0.07	0.008	0.144	0.012	0.129	0.026	0.022	0.041	0.063
cg12894649	0.025	0.2	0.065	0.053	0.239	0.011	0.029	0.104	0.005	0.043	0.01	0.172	0.02	0.007	0.001	0.018
cg23944804	0.018	0.205	0.061	0.042	0.281	0.01	0.026	0.106	0.002	0.032	0.002	0.186	0.011	0	0.01	0.007
cg14603345	0.021	0.233	0.081	0.056	0.296	0.01	0.039	0.093	0.002	0.029	0	0.195	0.014	0.009	0.008	0.01
cg20645074	0.014	0.078	0.155	0.078	0.25	0.016	0.021	0.095	0.025	0.062	0.026	0.072	0.026	0.002	0.008	0.007
cg17329494	0.022	0.143	0.45	0.164	0.502	0.023	0.06	0.095	0.011	0.135	0.009	0.179	0.018	0.032	0.015	0.02
cg17679824	0.005	0.031	0.085	0.018	0.131	0.006	0.022	0.126	0.015	0.094	0.01	0.005	0.015	0.01	0.01	0.012
cg09878888	0.04	0.193	0.547	0.185	0.597	0.04	0.085	0.061	0.031	0.07	0.031	0.218	0.044	0.037	0.031	0.043
cg01943873	0.041	0.097	0.137	0.144	0.361	0.039	0.051	0.083	0.043	0.067	0.047	0.084	0.044	0.053	0.047	0.035
cg22074576	0.013	0.049	0.126	0.054	0.207	0.011	0.019	0.064	0.009	0.103	0.005	0.104	0.009	0.007	0.002	0.013
cg16208357	0.017	0.046	0.101	0.027	0.141	0.015	0.021	0.079	0.013	0.158	0.013	0.097	0.017	0.011	0.015	0.01
cg24104567	0.02	0.045	0.192	0.027	0.262	0.017	0.025	0.1	0.007	0.181	0	0.094	0.016	0.003	0.007	0.009
cg22580629	0.03	0.053	0.304	0.047	0.382	0.033	0.057	0.08	0.06	0.06	0.077	0.157	0.027	0.033	0.035	0.031
cg16853842	0.099	0.117	0.213	0.114	0.268	0.111	0.123	0.207	0.061	0.143	0.055	0.206	0.13	0.136	0.127	0.141
cg12459718	0.071	0.155	0.552	0.326	0.585	0.077	0.055	0.087	0.012	0.06	0.021	0.136	0.053	0.031	0.013	0.019
cg19078576	0.02	0.024	0.078	0.074	0.224	0.02	0.042	0.158	0.016	0.046	0.03	0.058	0.024	0.018	0.022	0.016
cg14612335	0.019	0.026	0.406	0.076	0.35	0.021	0.037	0.048	0.025	0.08	0.035	0.063	0.042	0.049	0.037	0.043
cg06923988	0.024	0.034	0.126	0.104	0.237	0.023	0.023	0.068	0.011	0.06	0.023	0.079	0.031	0.03	0.028	0.023
cg22328786	0.02	0.043	0.09	0.035	0.165	0.02	0.045	0.086	0.024	0.039	0.012	0.051	0.002	0.005	0.004	0.004
cg25365958	0.092	0.151	0.659	0.222	0.751	0.105	0.09	0.138	0.185	0.079	0.069	0.245	0.032	0.04	0.038	0.048
cg03835987	0.035	0.073	0.57	0.141	0.589	0.042	0.117	0.068	0.025	0.189	0.029	0.227	0.045	0.092	0.044	0.044
cg21272996	0.056	0.3	0.827	0.471	0.833	0.052	0.082	0.117	0.05	0.095	0.044	0.218	0.041	0.037	0.038	0.034
cg10094443	0.037	0.062	0.232	0.061	0.354	0.041	0.068	0.087	0.03	0.082	0.044	0.114	0.054	0.053	0.043	0.047
cg18049167	0.209	0.426	0.713	0.284	0.743	0.227	0.061	0.144	0.036	0.24	0.018	0.197	0.014	0.024	0.021	0.014
cg17329164	0.12	0.267	0.502	0.169	0.548	0.12	0.031	0.11	0.019	0.14	0.026	0.1	0.006	0.002	0.011	0.014
cg14130039	0.196	0.312	0.432	0.221	0.421	0.196	0.102	0.085	0.045	0.215	0.098	0.25	0.05	0.069	0.049	0.053
cg10077746	0.024	0.03	0.267	0.051	0.436	0.028	0.1	0.221	0.13	0.15	0.071	0.107	0.036	0.016	0.02	0.067
cg20293716	0.017	0.106	0.288	0.065	0.427	0.025	0.052	0.154	0.065	0.22	0.065	0.128	0.028	0.039	0.032	0.018
cg02501827	0.014	0.181	0.701	0.152	0.707	0.017	0.057	0.229	0.058	0.322	0.022	0.205	0.011	0.122	0.028	0.053
cg12492653	0.132	0.324	0.73	0.372	0.755	0.118	0.244	0.311	0.211	0.441	0.209	0.211	0.14	0.239	0.105	0.2
cg12097222	0.015	0.129	0.035	0.031	0.209	0.015	0.022	0.093	0.011	0.056	0.001	0.161	0.018	0.021	0.019	0.014
cg05368555	0.054	0.07	0.286	0.075	0.362	0.052	0.084	0.106	0.054	0.082	0.063	0.131	0.066	0.055	0.06	0.062
cg15460809	0.024	0.042	0.192	0.038	0.263	0.027	0.037	0.066	0.031	0.049	0.045	0.101	0.044	0.037	0.045	0.036
cg02758236	0.029	0.073	0.3	0.214	0.54	0.032	0.17	0.185	0.053	0.339	0.017	0.107	0.02	0.039	0.049	0.05
cg11678461	0.011	0.031	0.126	0.068	0.201	0.01	0.01	0.079	0.045	0.115	0.026	0.067	0.014	0	0.013	0.01
cg08903019	0.061	0.185	0.491	0.155	0.611	0.067	0.077	0.085	0.053	0.074	0.071	0.191	0.098	0.157	0.068	0.076
cg22707529	0.036	0.052	0.423	0.089	0.39	0.034	0.053	0.074	0.022	0.076	0.033	0.164	0.041	0.043	0.039	0.041
cg20865323	0.031	0.032	0.278	0.051	0.255	0.028	0.036	0.059	0.019	0.065	0.028	0.103	0.033	0.033	0.04	0.033
cg23398700	0.052	0.096	0.228	0.065	0.383	0.047	0.117	0.101	0.02	0.113	0.145	0.12	0.03	0.018	0.023	0.026
cg12917475	0.044	0.06	0.335	0.058	0.336	0.046	0.058	0.059	0.049	0.089	0.063	0.123	0.057	0.066	0.054	0.063
cg05877109	0.044	0.05	0.346	0.058	0.346	0.043	0.061	0.056	0.037	0.079	0.028	0.114	0.052	0.035	0.047	0.04
cg25149155	0.085	0.104	0.386	0.105	0.391	0.082	0.111	0.116	0.072	0.136	0.078	0.145	0.11	0.118	0.109	0.099
cg04542489	0.025	0.051	0.214	0.043	0.216	0.028	0.04	0.055	0.028	0.086	0.077	0.053	0.05	0.054	0.039	0.035
cg25011475	0.035	0.103	0.297	0.101	0.364	0.034	0.052	0.153	0.027	0.08	0.059	0.147	0	0.023	0.012	0.027
cg08920121	0.004	0.017	0.051	0.015	0.117	0.005	0.013	0.125	0.01	0.061	0.007	0.031	0.007	0.003	0.01	0.012
cg01088404	0.051	0.196	0.491	0.717	0.777	0.044	0.091	0.122	0.063	0.096	0.138	0.149	0.062	0.123	0.053	0.066
cg12894649	0.025	0.2	0.065	0.053	0.239	0.011	0.029	0.104	0.005	0.043	0.01	0.172	0.02	0.007	0.001	0.018
cg23944804	0.018	0.205	0.061	0.042	0.281	0.01	0.026	0.106	0.002	0.032	0.002	0.186	0.011	0	0.01	0.007
cg14603345	0.021	0.233	0.081	0.056	0.296	0.01	0.039	0.093	0.002	0.029	0	0.195	0.014	0.009	0.008	0.01
cg05164926	0.015	0.062	0.503	0.059	0.418	0.062	0.075	0.072	0.225	0.041	0.052	0.163	0	0.003	0.002	0.004
cg14570838	0.043	0.074	0.275	0.172	0.442	0.046	0.071	0.095	0.073	0.08	0.075	0.167	0.049	0.058	0.071	0.068
cg24679890	0.017	0.025	0.54	0.062	0.494	0.04	0.074	0.079	0.354	0.047	0.032	0.237	0.018	0.024	0.019	0.018
cg07060074	0.038	0.072	0.274	0.068	0.363	0.044	0.07	0.068	0.049	0.08	0.048	0.16	0.05	0.046	0.049	0.059
cg01105256	0.046	0.087	0.26	0.07	0.35	0.055	0.083	0.068	0.047	0.081	0.064	0.118	0.068	0.068	0.063	0.059
cg25554283	0.011	0.028	0.044	0.017	0.291	0.01	0.017	0.102	0.005	0.48	0.009	0.045	0.05	0.088	0.009	0.027
cg02366988	0.074	0.103	0.1	0.077	0.226	0.075	0.07	0.107	0.07	0.392	0.086	0.156	0.092	0.1	0.091	0.087
cg23039471	0.021	0.059	0.107	0.049	0.217	0.024	0.041	0.078	0.02	0.109	0.031	0.064	0.031	0.023	0.022	0.025
cg12685846	0.042	0.237	0.216	0.084	0.288	0.03	0.027	0.058	0.011	0.026	0.011	0.159	0.011	0.003	0.017	0.005
cg04969688	0.11	0.281	0.288	0.166	0.326	0.095	0.095	0.086	0.083	0.078	0.114	0.249	0.081	0.086	0.089	0.082
cg13912858	0.09	0.282	0.426	0.268	0.475	0.045	0.3	0.593	0.051	0.342	0.045	0.287	0.103	0.121	0.098	0.064
cg18974926	0.038	0.088	0.202	0.086	0.326	0.033	0.082	0.13	0.021	0.099	0.038	0.11	0.042	0.027	0.04	0.025
cg11758932	0.027	0.081	0.151	0.102	0.258	0.018	0.045	0.119	0.018	0.086	0.011	0.086	0.05	0	0.027	0.018
cg20533952	0.062	0.231	0.354	0.141	0.44	0.143	0.027	0.074	0.013	0.054	0.016	0.256	0.026	0.013	0.017	0.013
cg02519892	0.097	0.152	0.214	0.126	0.248	0.136	0.082	0.078	0.066	0.069	0.081	0.192	0.07	0.07	0.081	0.079
cg24691069	0.008	0.028	0.094	0.146	0.216	0.009	0.032	0.103	0.01	0.109	0.041	0.051	0.011	0.012	0.021	0.034
cg22501342	0.053	0.092	0.229	0.325	0.377	0.06	0.121	0.115	0.066	0.104	0.206	0.094	0.056	0.064	0.068	0.082
cg21319458	0.047	0.089	0.335	0.142	0.466	0.046	0.102	0.102	0.114	0.134	0.054	0.172	0.06	0.043	0.046	0.05
cg16015423	0.018	0.159	0.267	0.073	0.323	0.017	0.034	0.076	0.069	0.026	0.017	0.226	0.01	0.044	0.022	0.01
cg17765751	0.018	0.09	0.105	0.033	0.142	0.016	0.016	0.063	0.028	0.046	0.022	0.124	0.021	0.02	0.021	0.009
cg12666727	0.02	0.017	0.419	0.26	0.406	0.021	0.108	0.089	0.053	0.054	0.078	0.15	0.015	0.031	0.009	0.022
cg19286686	0.036	0.08	0.092	0.096	0.208	0.042	0.046	0.07	0.032	0.071	0.06	0.093	0.045	0.072	0.04	0.038
cg23967461	0.03	0.129	0.159	0.254	0.353	0.035	0.027	0.075	0.021	0.057	0.05	0.12	0.06	0.091	0.033	0.029
cg24215978	0.068	0.109	0.293	0.114	0.54	0.076	0.055	0.072	0.061	0.504	0.082	0.2	0.057	0.05	0.028	0.036
cg08545123	0.109	0.133	0.166	0.136	0.308	0.117	0.157	0.184	0.09	0.388	0.136	0.152	0.173	0.162	0.148	0.135
cg08899626	0.111	0.176	0.353	0.158	0.643	0.115	0.083	0.107	0.049	0.616	0.062	0.251	0.069	0.079	0.052	0.057
cg03717364	0.026	0.167	0.507	0.137	0.515	0.03	0.102	0.053	0.112	0.438	0.01	0.286	0.027	0.041	0.012	0.012
cg04011671	0.018	0.108	0.463	0.08	0.46	0.023	0.052	0.077	0.068	0.389	0.011	0.164	0.029	0.022	0.02	0.012
cg01919374	0.067	0.054	0.264	0.229	0.435	0.089	0.057	0.12	0.017	0.172	0.017	0.207	0.034	0.051	0.041	0.039
cg07588964	0.015	0.026	0.049	0.027	0.163	0.018	0.027	0.145	0.016	0.044	0.011	0.067	0.022	0.044	0.022	0.014
cg07333046	0.068	0.095	0.13	0.087	0.27	0.072	0.084	0.114	0.116	0.118	0.087	0.115	0.084	0.09	0.088	0.073
cg24035962	0.025	0.053	0.093	0.064	0.248	0.026	0.034	0.086	0.11	0.085	0.049	0.099	0.066	0.06	0.049	0.024
cg10683341	0.021	0.037	0.242	0.046	0.245	0.028	0.042	0.097	0.013	0.063	0.022	0.129	0.021	0.023	0.025	0.018
cg23651614	0.04	0.046	0.235	0.084	0.235	0.039	0.055	0.068	0.037	0.074	0.041	0.099	0.044	0.04	0.059	0.052
cg24507266	0.072	0.218	0.461	0.185	0.533	0.11	0.112	0.111	0.057	0.031	0.028	0.316	0.02	0.026	0.021	0.024
cg25840538	0.052	0.21	0.564	0.159	0.583	0.07	0.111	0.116	0.06	0.103	0.055	0.198	0.061	0.082	0.067	0.056
cg25040783	0.051	0.064	0.342	0.136	0.401	0.054	0.072	0.105	0.036	0.092	0.044	0.123	0.071	0.064	0.045	0.054
cg12589431	0.076	0.215	0.554	0.345	0.69	0.083	0.114	0.092	0.059	0.093	0.054	0.295	0.086	0.074	0.118	0.077
cg19769182	0.015	0.141	0.254	0.089	0.327	0.018	0.134	0.118	0.009	0.054	0.098	0.149	0.004	0.014	0.009	0.004
cg10903451	0.014	0.117	0.05	0.039	0.155	0.011	0.022	0.091	0.003	0.052	0.005	0.093	0.003	0.004	0.012	0.011
cg00490655	0.036	0.187	0.068	0.064	0.227	0.021	0.023	0.095	0.009	0.062	0.001	0.165	0.015	0.032	0.026	0.023
cg22066230	0.026	0.03	0.041	0.044	0.066	0.026	0.02	0.166	0.046	0.089	0.01	0.027	0.035	0.029	0.049	0.027
cg25618573	0.016	0.044	0.287	0.098	0.447	0.018	0.033	0.13	0.089	0.336	0.019	0.075	0.046	0.188	0.088	0.067
cg19553869	0.017	0.04	0.207	0.105	0.311	0.02	0.025	0.1	0.075	0.221	0.017	0.085	0.026	0.054	0.031	0.035
cg15201417	0.024	0.033	0.18	0.097	0.289	0.02	0.03	0.128	0.049	0.211	0.03	0.073	0.031	0.038	0.031	0.029
cg22707529	0.036	0.052	0.423	0.089	0.39	0.034	0.053	0.074	0.022	0.076	0.033	0.164	0.041	0.043	0.039	0.041
cg20865323	0.031	0.032	0.278	0.051	0.255	0.028	0.036	0.059	0.019	0.065	0.028	0.103	0.033	0.033	0.04	0.033
cg15473346	0.007	0.021	0.435	0.397	0.372	0.008	0.04	0.15	0.017	0.061	0.088	0.039	0.008	0.002	0.001	0.003
cg06121450	0.055	0.062	0.265	0.232	0.234	0.054	0.069	0.087	0.052	0.089	0.142	0.139	0.083	0.072	0.058	0.071
cg25618573	0.016	0.044	0.287	0.098	0.447	0.018	0.033	0.13	0.089	0.336	0.019	0.075	0.046	0.188	0.088	0.067
cg19553869	0.017	0.04	0.207	0.105	0.311	0.02	0.025	0.1	0.075	0.221	0.017	0.085	0.026	0.054	0.031	0.035
cg15201417	0.024	0.033	0.18	0.097	0.289	0.02	0.03	0.128	0.049	0.211	0.03	0.073	0.031	0.038	0.031	0.029
cg09983897	0.004	0.024	0.082	0.017	0.122	0.008	0.009	0.051	0.053	0.037	0.04	0.057	0.006	0.01	0.011	0.01
cg10206344	0.067	0.074	0.342	0.156	0.344	0.081	0.09	0.085	0.333	0.079	0.166	0.159	0.097	0.098	0.066	0.075
cg17949727	0.008	0.021	0.231	0.017	0.197	0.01	0.031	0.075	0.057	0.108	0.024	0.049	0.007	0.012	0.013	0.015
cg10784030	0.055	0.065	0.197	0.058	0.194	0.059	0.072	0.111	0.091	0.133	0.059	0.093	0.065	0.054	0.047	0.071
cg05749969	0.062	0.082	0.387	0.076	0.342	0.067	0.077	0.099	0.1	0.159	0.075	0.145	0.08	0.057	0.082	0.069
cg14825976	0.127	0.149	0.593	0.16	0.591	0.15	0.073	0.077	0.062	0.327	0.044	0.228	0.088	0.072	0.064	0.055
cg22454011	0.17	0.177	0.645	0.17	0.621	0.199	0.114	0.121	0.062	0.502	0.046	0.178	0.159	0.078	0.065	0.055
cg25374649	0.073	0.09	0.535	0.101	0.53	0.093	0.074	0.086	0.058	0.276	0.052	0.159	0.077	0.059	0.049	0.045
cg11911122	0.032	0.044	0.371	0.057	0.385	0.033	0.091	0.086	0.031	0.253	0.042	0.117	0.035	0.042	0.045	0.048
cg11211259	0.07	0.175	0.383	0.157	0.503	0.06	0.073	0.094	0.045	0.129	0.052	0.149	0.105	0.102	0.079	0.066
cg19156483	0.034	0.214	0.192	0.066	0.305	0.028	0.039	0.136	0.012	0.071	0.006	0.163	0.029	0.018	0.031	0.016
cg15259986	0.089	0.305	0.284	0.137	0.4	0.095	0.114	0.155	0.067	0.111	0.086	0.247	0.095	0.101	0.08	0.082
cg22522509	0.025	0.044	0.145	0.072	0.239	0.022	0.047	0.068	0.054	0.062	0.056	0.085	0.037	0.021	0.071	0.018
cg23051349	0.021	0.114	0.654	0.219	0.697	0.043	0.07	0.086	0.27	0.042	0.038	0.189	0.026	0.204	0.23	0.217
cg08944236	0.039	0.117	0.531	0.077	0.564	0.052	0.123	0.063	0.043	0.328	0.071	0.267	0.077	0.058	0.061	0.054
cg05412028	0.051	0.203	0.462	0.182	0.466	0.094	0.032	0.134	0.058	0.092	0.029	0.164	0.07	0.026	0.007	0.016
cg26685941	0.093	0.224	0.415	0.201	0.377	0.151	0.076	0.148	0.166	0.095	0.104	0.219	0.067	0.058	0.025	0.043
cg22066230	0.026	0.03	0.041	0.044	0.066	0.026	0.02	0.166	0.046	0.089	0.01	0.027	0.035	0.029	0.049	0.027
cg25618573	0.016	0.044	0.287	0.098	0.447	0.018	0.033	0.13	0.089	0.336	0.019	0.075	0.046	0.188	0.088	0.067
cg19553869	0.017	0.04	0.207	0.105	0.311	0.02	0.025	0.1	0.075	0.221	0.017	0.085	0.026	0.054	0.031	0.035
cg15201417	0.024	0.033	0.18	0.097	0.289	0.02	0.03	0.128	0.049	0.211	0.03	0.073	0.031	0.038	0.031	0.029
cg21816330	0.031	0.086	0.213	0.085	0.387	0.041	0.061	0.228	0.187	0.102	0.047	0.129	0.047	0.054	0.022	0.017
cg15245095	0.023	0.093	0.095	0.038	0.177	0.031	0.027	0.087	0.007	0.03	0.005	0.139	0.008	0.01	0.01	0.017
cg03205584	0.07	0.156	0.159	0.09	0.201	0.077	0.074	0.123	0.03	0.095	0.06	0.191	0.062	0.054	0.032	0.043
cg08169020	0.887	0.262	0.015	0.078	0.016	0.868	0.032	0.086	0.021	0.032	0.009	0.442	0.183	0.007	0.003	0.01
cg21204860	0.447	0.231	0.093	0.518	0.231	0.678	0.307	0.641	0.14	0.093	0.347	0.42	0.073	0.253	0.202	0.242
cg19654743	0.727	0.496	0.14	0.747	0.31	0.842	0.313	0.534	0.18	0.076	0.504	0.585	0.188	0.281	0.162	0.2
cg00324097	0.363	0.118	0.058	0.385	0.1	0.571	0.164	0.392	0.072	0.064	0.123	0.346	0.054	0.082	0.083	0.095
cg06513247	0.45	0.264	0.062	0.392	0.14	0.644	0.18	0.26	0.147	0.069	0.155	0.383	0.067	0.154	0.109	0.115
cg19163395	0.883	0.857	0.129	0.868	0.174	0.924	0.323	0.171	0.016	0.044	0.025	0.634	0.03	0.069	0	0.025
cg14789659	0.819	0.683	0.217	0.62	0.525	0.854	0.17	0.102	0.051	0.097	0.047	0.409	0.088	0.062	0.053	0.055
cg00928816	0.796	0.682	0.327	0.644	0.553	0.854	0.223	0.143	0.111	0.073	0.059	0.52	0.078	0.1	0.059	0.058
cg20746552	0.697	0.643	0.321	0.563	0.544	0.759	0.23	0.158	0.106	0.106	0.076	0.436	0.077	0.092	0.064	0.069
cg16389209	0.749	0.6	0.288	0.602	0.496	0.804	0.203	0.126	0.095	0.073	0.06	0.406	0.127	0.145	0.074	0.082
cg13522882	0.856	0.629	0.235	0.716	0.335	0.866	0.146	0.08	0.066	0.079	0.039	0.682	0.073	0.058	0.041	0.034
cg12897164	0.634	0.06	0.437	0.098	0.341	0.823	0.198	0.076	0.293	0.081	0.084	0.521	0.503	0.318	0.091	0.167
cg07218880	0.741	0.38	0.155	0.085	0.177	0.805	0.319	0.142	0.058	0.122	0.125	0.591	0.429	0.313	0.149	0.124
cg11975790	0.725	0.248	0.158	0.64	0.189	0.756	0.442	0.195	0.042	0.167	0.046	0.579	0.085	0.056	0.059	0.045
cg25607383	0.786	0.516	0.444	0.689	0.467	0.779	0.472	0.335	0.125	0.327	0.133	0.638	0.355	0.258	0.122	0.106
cg24733624	0.304	0.479	0.278	0.128	0.394	0.692	0.373	0.088	0.208	0.077	0.188	0.358	0.178	0.241	0.08	0.119
cg05906166	0.382	0.19	0.047	0.049	0.043	0.438	0.155	0.119	0.173	0.145	0.302	0.343	0.037	0.071	0.077	0.099
cg27377289	0.895	0.041	0.111	0.734	0.168	0.901	0.617	0.154	0.119	0.196	0.084	0.701	0.609	0.107	0.045	0.04
cg07520810	0.549	0.551	0.255	0.527	0.471	0.637	0.131	0.087	0.067	0.052	0.041	0.356	0.063	0.044	0.036	0.04
cg14789659	0.819	0.683	0.217	0.62	0.525	0.854	0.17	0.102	0.051	0.097	0.047	0.409	0.088	0.062	0.053	0.055
cg00928816	0.796	0.682	0.327	0.644	0.553	0.854	0.223	0.143	0.111	0.073	0.059	0.52	0.078	0.1	0.059	0.058
cg20746552	0.697	0.643	0.321	0.563	0.544	0.759	0.23	0.158	0.106	0.106	0.076	0.436	0.077	0.092	0.064	0.069
cg16401465	0.76	0.66	0.333	0.698	0.576	0.815	0.183	0.108	0.126	0.11	0.085	0.457	0.242	0.162	0.098	0.087
cg16389209	0.749	0.6	0.288	0.602	0.496	0.804	0.203	0.126	0.095	0.073	0.06	0.406	0.127	0.145	0.074	0.082
cg07520810	0.549	0.551	0.255	0.527	0.471	0.637	0.131	0.087	0.067	0.052	0.041	0.356	0.063	0.044	0.036	0.04
cg20746552	0.697	0.643	0.321	0.563	0.544	0.759	0.23	0.158	0.106	0.106	0.076	0.436	0.077	0.092	0.064	0.069
cg16401465	0.76	0.66	0.333	0.698	0.576	0.815	0.183	0.108	0.126	0.11	0.085	0.457	0.242	0.162	0.098	0.087
cg16389209	0.749	0.6	0.288	0.602	0.496	0.804	0.203	0.126	0.095	0.073	0.06	0.406	0.127	0.145	0.074	0.082
cg08832851	0.392	0.038	0.036	0.05	0.036	0.43	0.166	0.115	0.214	0.183	0.465	0.312	0.019	0.069	0.051	0.063
cg14789659	0.819	0.683	0.217	0.62	0.525	0.854	0.17	0.102	0.051	0.097	0.047	0.409	0.088	0.062	0.053	0.055
cg00928816	0.796	0.682	0.327	0.644	0.553	0.854	0.223	0.143	0.111	0.073	0.059	0.52	0.078	0.1	0.059	0.058
cg20746552	0.697	0.643	0.321	0.563	0.544	0.759	0.23	0.158	0.106	0.106	0.076	0.436	0.077	0.092	0.064	0.069
cg16389209	0.749	0.6	0.288	0.602	0.496	0.804	0.203	0.126	0.095	0.073	0.06	0.406	0.127	0.145	0.074	0.082
cg05098343	0.453	0.798	0.501	0.679	0.477	0.839	0.134	0.1	0.059	0.064	0.081	0.381	0.356	0.091	0.061	0.115
cg01424562	0.849	0.559	0.107	0.41	0.132	0.837	0.181	0.132	0.107	0.127	0.062	0.636	0.5	0.273	0.217	0.091
cg11006453	0.885	0.633	0.226	0.525	0.192	0.887	0.22	0.2	0.017	0.054	0.815	0.372	0.562	0.207	0.056	0.143
cg13157980	0.371	0.492	0.075	0.261	0.074	0.487	0.12	0.074	0.037	0.074	0.151	0.231	0.374	0.11	0.065	0.079
cg05052463	0.855	0.155	0.478	0.579	0.443	0.846	0.294	0.1	0.04	0.239	0.117	0.732	0.346	0.041	0.044	0.041
cg12827637	0.521	0.361	0.023	0.212	0.022	0.537	0.08	0.109	0.011	0.059	0.058	0.508	0.379	0.376	0.112	0.056
cg08309687	0.548	0.586	0.085	0.08	0.077	0.593	0.395	0.452	0.047	0.093	0.158	0.42	0.086	0.055	0.062	0.049
cg00458932	0.811	0.581	0.407	0.683	0.436	0.784	0.178	0.02	0.219	0.062	0.206	0.378	0.055	0.088	0.038	0.073
cg00936790	0.8	0.578	0.132	0.535	0.286	0.79	0.168	0.099	0.467	0.093	0.059	0.462	0.436	0.105	0.033	0.022
cg19692929	0.437	0.309	0.049	0.192	0.075	0.463	0.2	0.194	0.1	0.257	0.098	0.363	0.086	0.07	0.056	0.04
cg02737268	0.913	0.098	0.141	0.358	0.135	0.899	0.407	0.724	0.073	0.927	0.426	0.453	0.102	0.051	0.064	0.082
cg07520810	0.549	0.551	0.255	0.527	0.471	0.637	0.131	0.087	0.067	0.052	0.041	0.356	0.063	0.044	0.036	0.04
cg14789659	0.819	0.683	0.217	0.62	0.525	0.854	0.17	0.102	0.051	0.097	0.047	0.409	0.088	0.062	0.053	0.055
cg00928816	0.796	0.682	0.327	0.644	0.553	0.854	0.223	0.143	0.111	0.073	0.059	0.52	0.078	0.1	0.059	0.058
cg20746552	0.697	0.643	0.321	0.563	0.544	0.759	0.23	0.158	0.106	0.106	0.076	0.436	0.077	0.092	0.064	0.069
cg16389209	0.749	0.6	0.288	0.602	0.496	0.804	0.203	0.126	0.095	0.073	0.06	0.406	0.127	0.145	0.074	0.082
cg12474798	0.52	0.42	0.29	0.498	0.347	0.532	0.13	0.158	0.015	0.04	0.02	0.412	0.026	0.03	0.025	0.028
cg20684110	0.536	0.392	0.34	0.515	0.405	0.54	0.161	0.262	0.035	0.111	0.078	0.385	0.084	0.115	0.109	0.108
cg01005506	0.327	0.335	0.235	0.315	0.257	0.329	0.134	0.082	0.045	0.087	0.067	0.325	0.06	0.056	0.065	0.067
cg03934681	0.172	0.128	0.098	0.143	0.095	0.209	0.073	0	0.045	0.101	0.092	0.152	0.046	0.007	0.006	0.019
cg27037013	0.722	0.618	0.186	0.18	0.155	0.708	0.589	0.422	0.081	0.159	0.144	0.54	0.057	0.061	0.048	0.082
cg17084151	0.499	0.544	0.503	0.105	0.558	0.588	0.12	0.126	0.043	0.089	0.071	0.567	0.06	0.025	0.023	0.028
cg22109530	0.663	0.528	0.408	0.595	0.392	0.671	0.074	0.147	0.216	0.182	0.101	0.486	0.011	0.012	0.009	0.018
cg14515791	0.875	0.792	0.718	0.837	0.703	0.872	0.216	0.197	0.291	0.21	0.138	0.772	0.132	0.134	0.134	0.138
cg07520810	0.549	0.551	0.255	0.527	0.471	0.637	0.131	0.087	0.067	0.052	0.041	0.356	0.063	0.044	0.036	0.04
cg16401465	0.76	0.66	0.333	0.698	0.576	0.815	0.183	0.108	0.126	0.11	0.085	0.457	0.242	0.162	0.098	0.087
cg16389209	0.749	0.6	0.288	0.602	0.496	0.804	0.203	0.126	0.095	0.073	0.06	0.406	0.127	0.145	0.074	0.082
cg26141173	0.025	0.051	0.036	0.014	0.02	0.098	0.019	0.081	0.043	0.056	0.133	0.01	0.017	0.021	0.026	0.013
cg09825146	0.091	0.094	0.071	0.063	0.073	0.105	0.064	0.123	0.203	0.206	0.179	0.056	0.059	0.076	0.066	0.066
cg25375711	0.11	0.101	0.088	0.062	0.082	0.142	0.073	0.092	0.079	0.088	0.218	0.113	0.09	0.059	0.072	0.072
cg11006453	0.885	0.633	0.226	0.525	0.192	0.887	0.22	0.2	0.017	0.054	0.815	0.372	0.562	0.207	0.056	0.143
cg23731089	0.926	0.75	0.329	0.806	0.319	0.927	0.337	0.33	0.068	0.117	0.557	0.695	0.575	0.234	0.05	0.11
cg13157980	0.371	0.492	0.075	0.261	0.074	0.487	0.12	0.074	0.037	0.074	0.151	0.231	0.374	0.11	0.065	0.079
cg03974193	0.781	0.723	0.282	0.832	0.368	0.821	0.194	0.252	0.105	0.195	0.053	0.724	0.087	0.066	0.047	0.056
cg06025456	0.87	0.555	0.916	0.588	0.919	0.901	0.089	0.13	0.037	0.361	0.049	0.67	0.014	0.038	0.018	0.012
cg23359665	0.89	0.589	0.922	0.595	0.932	0.898	0.145	0.142	0.021	0.425	0.051	0.683	0.006	0.042	0.011	0.026
cg13934406	0.85	0.554	0.872	0.551	0.895	0.859	0.104	0.137	0.023	0.432	0.059	0.758	0.008	0.042	0.023	0.018
cg25426302	0.865	0.69	0.858	0.725	0.884	0.86	0.259	0.195	0.038	0.545	0.169	0.719	0.067	0.178	0.1	0.104
cg06108383	0.88	0.689	0.892	0.645	0.909	0.883	0.317	0.216	0.056	0.503	0.178	0.72	0.13	0.331	0.155	0.209
cg17113856	0.758	0.594	0.823	0.594	0.838	0.75	0.308	0.212	0.071	0.486	0.159	0.607	0.081	0.202	0.115	0.137
cg25526001	0.74	0.244	0.261	0.348	0.377	0.738	0.392	0.277	0.068	0.09	0.091	0.579	0.473	0.231	0.114	0.065
cg03024660	0.154	0.025	0.027	0.082	0.027	0.199	0.172	0.06	0.026	0.048	0.129	0.142	0.136	0.061	0.031	0.056
cg19645639	0.726	0.537	0.375	0.739	0.458	0.791	0.189	0.052	0.051	0.057	0.049	0.616	0.064	0.325	0.247	0.234
cg04858631	0.659	0.148	0.079	0.052	0.161	0.644	0.219	0.137	0.231	0.718	0.1	0.499	0.432	0.212	0.129	0.082
cg02962602	0.557	0.481	0.327	0.281	0.231	0.494	0.181	0.082	0.037	0.066	0.05	0.308	0.208	0.054	0.053	0.055
cg11316887	0.825	0.151	0.267	0.085	0.187	0.876	0.347	0.135	0.778	0.293	0.331	0.644	0.409	0.47	0.151	0.191
cg19147129	0.233	0.255	0.135	0.091	0.403	0.3	0.073	0.176	0.017	0.105	0.02	0.26	0.017	0.008	0.011	0
cg25499543	0.849	0.801	0.566	0.736	0.612	0.834	0.227	0.154	0.119	0.106	0.121	0.713	0.432	0.33	0.079	0.108
cg25503381	0.769	0.659	0.429	0.619	0.467	0.769	0.179	0.152	0.116	0.128	0.088	0.62	0.164	0.083	0.073	0.074
cg17150898	0.858	0.549	0.175	0.842	0.296	0.852	0.338	0.398	0.016	0.578	0.187	0.577	0.03	0.109	0.123	0.093
cg00957901	0.679	0.646	0.595	0.676	0.59	0.754	0.168	0.119	0.082	0.163	0.06	0.624	0.063	0.028	0.044	0.04
cg16829306	0.375	0.298	0.113	0.208	0.067	0.365	0.11	0.121	0.075	0.1	0.091	0.333	0.078	0.096	0.07	0.083
cg17230773	0.425	0.22	0.05	0.051	0.06	0.474	0.205	0.118	0.571	0.085	0.243	0.515	0.047	0.119	0.084	0.093
cg13442969	0.259	0.204	0.077	0.12	0.09	0.355	0.114	0.079	0.05	0.116	0.28	0.327	0.158	0.105	0.079	0.103
cg06025456	0.87	0.555	0.916	0.588	0.919	0.901	0.089	0.13	0.037	0.361	0.049	0.67	0.014	0.038	0.018	0.012
cg23359665	0.89	0.589	0.922	0.595	0.932	0.898	0.145	0.142	0.021	0.425	0.051	0.683	0.006	0.042	0.011	0.026
cg13934406	0.85	0.554	0.872	0.551	0.895	0.859	0.104	0.137	0.023	0.432	0.059	0.758	0.008	0.042	0.023	0.018
cg10551329	0.785	0.555	0.843	0.55	0.879	0.785	0.148	0.295	0.029	0.517	0.155	0.632	0.047	0.123	0.085	0.103
cg06108383	0.88	0.689	0.892	0.645	0.909	0.883	0.317	0.216	0.056	0.503	0.178	0.72	0.13	0.331	0.155	0.209
cg16481280	0.899	0.743	0.893	0.767	0.92	0.901	0.254	0.16	0.026	0.556	0.397	0.78	0.055	0.297	0.171	0.222
cg17113856	0.758	0.594	0.823	0.594	0.838	0.75	0.308	0.212	0.071	0.486	0.159	0.607	0.081	0.202	0.115	0.137
cg10502324	0.091	0.509	0.11	0.351	0.172	0.679	0.133	0.06	0.769	0.073	0.143	0.221	0.515	0.471	0.156	0.37
cg03626672	0.717	0.559	0.678	0.519	0.353	0.713	0.222	0.158	0.199	0.132	0.18	0.542	0.017	0.01	0.041	0.028
cg10807894	0.64	0.532	0.369	0.636	0.386	0.714	0.117	0.023	0.06	0.047	0.02	0.535	0.387	0.428	0.075	0.116
cg06578276	0.637	0.529	0.338	0.531	0.309	0.624	0.375	0.11	0.072	0.073	0.121	0.394	0.096	0.079	0.077	0.079
cg26077811	0.485	0.326	0.366	0.467	0.381	0.622	0.386	0.082	0.06	0.084	0.082	0.468	0.195	0.215	0.112	0.126
cg26401541	0.797	0.631	0.499	0.673	0.502	0.871	0.189	0.145	0.326	0.134	0.367	0.434	0.396	0.19	0.024	0.071
cg06025456	0.87	0.555	0.916	0.588	0.919	0.901	0.089	0.13	0.037	0.361	0.049	0.67	0.014	0.038	0.018	0.012
cg23359665	0.89	0.589	0.922	0.595	0.932	0.898	0.145	0.142	0.021	0.425	0.051	0.683	0.006	0.042	0.011	0.026
cg13934406	0.85	0.554	0.872	0.551	0.895	0.859	0.104	0.137	0.023	0.432	0.059	0.758	0.008	0.042	0.023	0.018
cg06108383	0.88	0.689	0.892	0.645	0.909	0.883	0.317	0.216	0.056	0.503	0.178	0.72	0.13	0.331	0.155	0.209
cg17113856	0.758	0.594	0.823	0.594	0.838	0.75	0.308	0.212	0.071	0.486	0.159	0.607	0.081	0.202	0.115	0.137
cg18842353	0.652	0.564	0.411	0.714	0.456	0.761	0.161	0.088	0.131	0.073	0.106	0.526	0.444	0.2	0.071	0.143
cg08884752	0.716	0.829	0.123	0.849	0.418	0.761	0.162	0.147	0.047	0.085	0.254	0.49	0.258	0.207	0.091	0.077
cg21204860	0.447	0.231	0.093	0.518	0.231	0.678	0.307	0.641	0.14	0.093	0.347	0.42	0.073	0.253	0.202	0.242
cg19654743	0.727	0.496	0.14	0.747	0.31	0.842	0.313	0.534	0.18	0.076	0.504	0.585	0.188	0.281	0.162	0.2
cg00324097	0.363	0.118	0.058	0.385	0.1	0.571	0.164	0.392	0.072	0.064	0.123	0.346	0.054	0.082	0.083	0.095
cg06608359	0.39	0.324	0.081	0.276	0.096	0.424	0.19	0.121	0.058	0.093	0.099	0.357	0.208	0.199	0.097	0.078
cg20741105	0.813	0.1	0.593	0.549	0.412	0.846	0.222	0.33	0.245	0.217	0.519	0.726	0.435	0.046	0.068	0.054
cg24524013	0.54	0.562	0.528	0.551	0.551	0.565	0.357	0.33	0.06	0.079	0.1	0.517	0.494	0.264	0.217	0.132
cg10517535	0.386	0.449	0.364	0.565	0.529	0.691	0.42	0.644	0.024	0.115	0.08	0.431	0.172	0.05	0.096	0.031
cg16215084	0.829	0.823	0.362	0.82	0.472	0.797	0.338	0.192	0.072	0.08	0.111	0.726	0.063	0.057	0.054	0.057
cg25251478	0.845	0.834	0.447	0.835	0.533	0.827	0.437	0.274	0.105	0.106	0.128	0.733	0.12	0.121	0.108	0.106
cg27023597	0.498	0.59	0.205	0.469	0.381	0.721	0.292	0.151	0.134	0.137	0.688	0.411	0.174	0.283	0.087	0.111
cg14611816	0.536	0.449	0.329	0.468	0.281	0.52	0.303	0.099	0.052	0.076	0.089	0.352	0.097	0.068	0.068	0.06
cg18571640	0.501	0.45	0.376	0.473	0.369	0.578	0.151	0.145	0.325	0.19	0.06	0.479	0.064	0.035	0.053	0.03
cg19856897	0.268	0.071	0.045	0.046	0.05	0.325	0.144	0.222	0.238	0.105	0.182	0.389	0.09	0.07	0.071	0.091
cg03064100	0.669	0.458	0.412	0.211	0.427	0.84	0.209	0.514	0.179	0.071	0.488	0.495	0.742	0.267	0.103	0.15
cg20968678	0.759	0.555	0.229	0.56	0.277	0.739	0.556	0.37	0.132	0.187	0.118	0.586	0.171	0.103	0.075	0.088
cg21204860	0.447	0.231	0.093	0.518	0.231	0.678	0.307	0.641	0.14	0.093	0.347	0.42	0.073	0.253	0.202	0.242
cg19654743	0.727	0.496	0.14	0.747	0.31	0.842	0.313	0.534	0.18	0.076	0.504	0.585	0.188	0.281	0.162	0.2
cg00324097	0.363	0.118	0.058	0.385	0.1	0.571	0.164	0.392	0.072	0.064	0.123	0.346	0.054	0.082	0.083	0.095
cg23565821	0.196	0.52	0.187	0.37	0.213	0.439	0.251	0.063	0.045	0.075	0.281	0.14	0.102	0.234	0.066	0.103
cg08433504	0.844	0.821	0.838	0.756	0.769	0.846	0.223	0.193	0.099	0.052	0.034	0.746	0.034	0.028	0.038	0.022
cg10078511	0.697	0.652	0.605	0.609	0.585	0.692	0.203	0.123	0.099	0.073	0.102	0.608	0.081	0.061	0.045	0.063
cg15815318	0.79	0.635	0.524	0.695	0.522	0.792	0.714	0.286	0.212	0.415	0.446	0.651	0.179	0.079	0.024	0.066
cg09850101	0.842	0.632	0.55	0.714	0.527	0.853	0.524	0.2	0.106	0.293	0.154	0.676	0.221	0.041	0.028	0.035
cg02676175	0.371	0.532	0.523	0.703	0.379	0.541	0.094	0.185	0.09	0.062	0.046	0.4	0.027	0.037	0.039	0.027
cg19222784	0.783	0.182	0.537	0.679	0.513	0.799	0.341	0.259	0.508	0.091	0.367	0.631	0.032	0.089	0.078	0.107
cg20949700	0.883	0.813	0.866	0.861	0.852	0.886	0.535	0.449	0.854	0.213	0.464	0.842	0.042	0.108	0.095	0.13
cg24834889	0.353	0.266	0.231	0.297	0.283	0.356	0.099	0.07	0.073	0.491	0.066	0.333	0.118	0.108	0.099	0.103
cg05280698	0.346	0.219	0.17	0.284	0.229	0.368	0.049	0.076	0.016	0.545	0.019	0.291	0.048	0.039	0.043	0.029
cg20749792	0.869	0.877	0.137	0.594	0.284	0.85	0.166	0.091	0.405	0.765	0.091	0.703	0.342	0.125	0.05	0.06
cg17970299	0.879	0.889	0.856	0.826	0.867	0.869	0.288	0.064	0.047	0.067	0.117	0.681	0.033	0.041	0.015	0.02
cg05258935	0.951	0.956	0.952	0.95	0.96	0.936	0.166	0.025	0.007	0.171	0.007	0.953	0.008	0.008	0.009	0.009
cg06401414	0.889	0.532	0.426	0.764	0.488	0.888	0.398	0.544	0.061	0.049	0.089	0.642	0.659	0.219	0.021	0.041
cg25170017	0.886	0.512	0.102	0.436	0.087	0.704	0.097	0.142	0.445	0.041	0.079	0.581	0.494	0.385	0.177	0.161
cg26648185	0.616	0.54	0.085	0.593	0.094	0.698	0.489	0.508	0.2	0.228	0.164	0.529	0.105	0.19	0.091	0.188
cg21935981	0.578	0.929	0.937	0.866	0.945	0.886	0.221	0.142	0.013	0.058	0.056	0.554	0.374	0.38	0.122	0.141
cg22488367	0.586	0.842	0.821	0.77	0.823	0.8	0.183	0.127	0.053	0.08	0.059	0.572	0.247	0.175	0.053	0.071
cg04223044	0.48	0.882	0.836	0.778	0.837	0.781	0.198	0.125	0.06	0.09	0.048	0.497	0.101	0.121	0.051	0.067
cg12251779	0.594	0.808	0.814	0.76	0.825	0.79	0.208	0.132	0.037	0.07	0.047	0.56	0.135	0.164	0.058	0.056
cg14032089	0.86	0.612	0.309	0.779	0.447	0.9	0.31	0.139	0.54	0.111	0.455	0.66	0.21	0.36	0.062	0.105
cg11688949	0.539	0.491	0.397	0.512	0.469	0.551	0.203	0.175	0.033	0.098	0.034	0.49	0.106	0.043	0.03	0.049
cg08433504	0.844	0.821	0.838	0.756	0.769	0.846	0.223	0.193	0.099	0.052	0.034	0.746	0.034	0.028	0.038	0.022
cg10078511	0.697	0.652	0.605	0.609	0.585	0.692	0.203	0.123	0.099	0.073	0.102	0.608	0.081	0.061	0.045	0.063
cg21935981	0.578	0.929	0.937	0.866	0.945	0.886	0.221	0.142	0.013	0.058	0.056	0.554	0.374	0.38	0.122	0.141
cg22488367	0.586	0.842	0.821	0.77	0.823	0.8	0.183	0.127	0.053	0.08	0.059	0.572	0.247	0.175	0.053	0.071
cg04223044	0.48	0.882	0.836	0.778	0.837	0.781	0.198	0.125	0.06	0.09	0.048	0.497	0.101	0.121	0.051	0.067
cg12251779	0.594	0.808	0.814	0.76	0.825	0.79	0.208	0.132	0.037	0.07	0.047	0.56	0.135	0.164	0.058	0.056
cg20038070	0.767	0.695	0.478	0.575	0.549	0.75	0.316	0.119	0.039	0.562	0.081	0.639	0.065	0.034	0.04	0.042
cg24503369	0.856	0.718	0.537	0.73	0.575	0.852	0.243	0.128	0.185	0.163	0.398	0.71	0.125	0.11	0.083	0.128
cg11006453	0.885	0.633	0.226	0.525	0.192	0.887	0.22	0.2	0.017	0.054	0.815	0.372	0.562	0.207	0.056	0.143
cg23731089	0.926	0.75	0.329	0.806	0.319	0.927	0.337	0.33	0.068	0.117	0.557	0.695	0.575	0.234	0.05	0.11
cg09757525	0.074	0.052	0.072	0.052	0.116	0.158	0.046	0.08	0.053	0.102	0.038	0.126	0.056	0.071	0.052	0.066
cg08659179	0.725	0.566	0.518	0.537	0.508	0.712	0.165	0.116	0.045	0.63	0.069	0.658	0.038	0.097	0.044	0.053
cg20805133	0.929	0.371	0.028	0.41	0.028	0.917	0.102	0.217	0.095	0.868	0.058	0.625	0.784	0.746	0.476	0.408
cg06382930	0.457	0.416	0.066	0.37	0.098	0.443	0.243	0.153	0.121	0.342	0.121	0.412	0.067	0.039	0.031	0.043
cg12474798	0.52	0.42	0.29	0.498	0.347	0.532	0.13	0.158	0.015	0.04	0.02	0.412	0.026	0.03	0.025	0.028
cg20684110	0.536	0.392	0.34	0.515	0.405	0.54	0.161	0.262	0.035	0.111	0.078	0.385	0.084	0.115	0.109	0.108
cg01005506	0.327	0.335	0.235	0.315	0.257	0.329	0.134	0.082	0.045	0.087	0.067	0.325	0.06	0.056	0.065	0.067
cg07438103	0.586	0.488	0.143	0.427	0.094	0.575	0.161	0.144	0.139	0.143	0.098	0.518	0.267	0.231	0.241	0.196
cg03962527	0.641	0.526	0.455	0.647	0.407	0.654	0.187	0.114	0.061	0.305	0.037	0.54	0.097	0.1	0.133	0.165
cg05214460	0.359	0.318	0.324	0.351	0.299	0.358	0.173	0.108	0.098	0.295	0.149	0.349	0.187	0.127	0.136	0.143
cg07165260	0.856	0.809	0.211	0.813	0.33	0.89	0.138	0.407	0.018	0.17	0.111	0.683	0.763	0.482	0.067	0.149
cg20668662	0.003	0.002	0.002	0.002	0.003	0.002	0.287	0.086	0.005	0.073	0.005	0.011	0.002	0.002	0	0.003
cg24888989	0.011	0.016	0.014	0.009	0.014	0.011	0.141	0.063	0.004	0.037	0.032	0.007	0.011	0.008	0.009	0.005
cg00702638	0.007	0.014	0.013	0.006	0.013	0.01	0.146	0.056	0.003	0.035	0.045	0.006	0.011	0.003	0.007	0.006
cg26792755	0.013	0.023	0.015	0.01	0.013	0.013	0.206	0.104	0.008	0.063	0	0.013	0.018	0.014	0.016	0.02
cg24888989	0.011	0.016	0.014	0.009	0.014	0.011	0.141	0.063	0.004	0.037	0.032	0.007	0.011	0.008	0.009	0.005
cg00702638	0.007	0.014	0.013	0.006	0.013	0.01	0.146	0.056	0.003	0.035	0.045	0.006	0.011	0.003	0.007	0.006
cg14284618	0.027	0.031	0.028	0.026	0.029	0.035	0.317	0.057	0.034	0.057	0.108	0.069	0.041	0.045	0.011	0.024
cg14377596	0.007	0.01	0.011	0.006	0.012	0.009	0.294	0.108	0.196	0.19	0.029	0.031	0.014	0.002	0.013	0.013
cg26660541	0.01	0.021	0.013	0.016	0.012	0.012	0.158	0.084	0.007	0.066	0.012	0.024	0.02	0.019	0.015	0.019
cg20160885	0.086	0.129	0.104	0.096	0.093	0.09	0.277	0.261	0.059	0.162	0.124	0.115	0.159	0.138	0.121	0.125
cg10569694	0.063	0.118	0.08	0.068	0.079	0.058	0.228	0.126	0.096	0.14	0.173	0.117	0.131	0.135	0.134	0.127
cg09934056	0.049	0.053	0.048	0.046	0.045	0.053	0.425	0.101	0.053	0.117	0.093	0.075	0.08	0.068	0.059	0.061
cg26104083	0.014	0.031	0.024	0.021	0.029	0.01	0.703	0.682	0.06	0.585	0.057	0.051	0.009	0.02	0.045	0.028
cg17697016	0.223	0.266	0.26	0.235	0.288	0.213	0.653	0.734	0.117	0.63	0.268	0.216	0.113	0.16	0.231	0.195
cg08128768	0.008	0.008	0.035	0.007	0.02	0.006	0.399	0.082	0.038	0.036	0.568	0.038	0.017	0.057	0.018	0.017
cg24794433	0.06	0.059	0.095	0.064	0.078	0.053	0.491	0.124	0.06	0.101	0.492	0.134	0.082	0.127	0.061	0.089
cg11751645	0.037	0.092	0.062	0.05	0.084	0.045	0.402	0.147	0.012	0.297	0.018	0.067	0.016	0.01	0.007	0.029
cg07816687	0.028	0.055	0.043	0.042	0.064	0.032	0.418	0.601	0.009	0.044	0.014	0.063	0.034	0.043	0.076	0.063
cg05436064	0.006	0.014	0.012	0.007	0.027	0.009	0.308	0.53	0.002	0.061	0.024	0.027	0	0.022	0.001	0.007
cg09030672	0.069	0.075	0.072	0.067	0.084	0.063	0.362	0.456	0.089	0.118	0.072	0.09	0.072	0.053	0.072	0.081
cg23156348	0.029	0.061	0.057	0.03	0.042	0.031	0.286	0.086	0.027	0.109	0.031	0.05	0.042	0.037	0.032	0.047
cg03717588	0.041	0.055	0.042	0.032	0.048	0.031	0.412	0.212	0.021	0.283	0.049	0.075	0.026	0.039	0.036	0.041
cg24458609	0.09	0.15	0.113	0.094	0.141	0.089	0.416	0.162	0.043	0.402	0.085	0.159	0.054	0.039	0.039	0.054
cg04221117	0.114	0.07	0.078	0.069	0.065	0.1	0.586	0.34	0.068	0.192	0.081	0.041	0.157	0.035	0.037	0.058
cg25252585	0.008	0.016	0.012	0.009	0.024	0.009	0.43	0.346	0.006	0.63	0.01	0.003	0.011	0.009	0.012	0.005
cg22880620	0.051	0.054	0.057	0.049	0.049	0.053	0.243	0.141	0.066	0.094	0.171	0.114	0.077	0.074	0.09	0.08
cg01626459	0.029	0.031	0.04	0.031	0.034	0.027	0.35	0.165	0.041	0.124	0.219	0.066	0.04	0.021	0.03	0.042
cg17046776	0.021	0.074	0.117	0.035	0.108	0.017	0.286	0.111	0.014	0.054	0.084	0.076	0.017	0.015	0.012	0.015
cg09248054	0.009	0.015	0.008	0.012	0.012	0.01	0.487	0.214	0.02	0.929	0.006	0.054	0.019	0	0.015	0.028
cg16318112	0.032	0.04	0.034	0.046	0.042	0.038	0.435	0.21	0.05	0.939	0.093	0.069	0.046	0.031	0.03	0.042
cg26956371	0.021	0.079	0.052	0.023	0.039	0.021	0.21	0.131	0.004	0.079	0.005	0.037	0.021	0.023	0.021	0.025
cg16630989	0.01	0.01	0.014	0.013	0.011	0.011	0.158	0.14	0.012	0.046	0.015	0.025	0.031	0.049	0.031	0.021
cg20161976	0.027	0.051	0.054	0.035	0.064	0.03	0.399	0.1	0.063	0.342	0.037	0.083	0.05	0.07	0.052	0.058
cg25940946	0.012	0.014	0.017	0.012	0.016	0.009	0.193	0.251	0.032	0.044	0.051	0.012	0.018	0.017	0.025	0.017
cg25037461	0.068	0.061	0.068	0.056	0.066	0.054	0.166	0.173	0.081	0.076	0.112	0.082	0.085	0.089	0.092	0.08
cg13496979	0.016	0.063	0.027	0.016	0.022	0.016	0.371	0.154	0.004	0.576	0.013	0.057	0.016	0.023	0.029	0.024
cg07816687	0.028	0.055	0.043	0.042	0.064	0.032	0.418	0.601	0.009	0.044	0.014	0.063	0.034	0.043	0.076	0.063
cg05436064	0.006	0.014	0.012	0.007	0.027	0.009	0.308	0.53	0.002	0.061	0.024	0.027	0	0.022	0.001	0.007
cg09030672	0.069	0.075	0.072	0.067	0.084	0.063	0.362	0.456	0.089	0.118	0.072	0.09	0.072	0.053	0.072	0.081
cg08382235	0.005	0.012	0.007	0.008	0.01	0.005	0.524	0.129	0.098	0.538	0.019	0.036	0.017	0.083	0.366	0.194
cg08455275	0.017	0.018	0.016	0.013	0.014	0.015	0.204	0.125	0.196	0.05	0.039	0.024	0.009	0.029	0.019	0.012
cg26942121	0.01	0.032	0.05	0.011	0.041	0.008	0.167	0.079	0.041	0.05	0.066	0.06	0.007	0.015	0.014	0.014
cg19827023	0.054	0.067	0.069	0.06	0.064	0.061	0.415	0.176	0.129	0.144	0.078	0.115	0.046	0.059	0.05	0.066
cg16821992	0.033	0.053	0.172	0.118	0.32	0.046	0.474	0.077	0.237	0.063	0.056	0.071	0.04	0.064	0.017	0.047
cg04814450	0.047	0.05	0.049	0.042	0.04	0.043	0.361	0.11	0.055	0.091	0.137	0.11	0.059	0.095	0.09	0.075
cg23881926	0.004	0.058	0.018	0.008	0.015	0.01	0.556	0.456	0.017	0.843	0.007	0.025	0.064	0.012	0.12	0.033
cg01602153	0.005	0.049	0.015	0.007	0.015	0.014	0.459	0.471	0.023	0.787	0.009	0.029	0.037	0.007	0.099	0.021
cg21406075	0.05	0.098	0.083	0.056	0.088	0.053	0.647	0.469	0.109	0.461	0.051	0.078	0.04	0.062	0.135	0.148
cg05091570	0.038	0.044	0.048	0.031	0.04	0.032	0.406	0.12	0.216	0.276	0.115	0.077	0.026	0.056	0.07	0.064
cg12041387	0.065	0.07	0.057	0.057	0.062	0.058	0.359	0.174	0.035	0.106	0.052	0.087	0.03	0.121	0.079	0.08
cg08835113	0.045	0.049	0.039	0.038	0.038	0.036	0.299	0.21	0.033	0.137	0.069	0.071	0.031	0.074	0.05	0.058
cg14362630	0.032	0.087	0.037	0.022	0.035	0.03	0.465	0.146	0.087	0.57	0.012	0.1	0.116	0.125	0.029	0.057
cg15460348	0.032	0.03	0.044	0.038	0.037	0.034	0.594	0.276	0.172	0.811	0.066	0.034	0.058	0.117	0.07	0.084
cg20261167	0.032	0.039	0.053	0.041	0.054	0.031	0.626	0.288	0.653	0.73	0.173	0.036	0.081	0.125	0.067	0.105
cg00532413	0.032	0.038	0.04	0.036	0.036	0.033	0.246	0.098	0.075	0.075	0.055	0.057	0.054	0.06	0.055	0.047
cg00588920	0.019	0.027	0.034	0.022	0.057	0.015	0.353	0.291	0.052	0.401	0.026	0.033	0.056	0.026	0.059	0.037
cg12041387	0.065	0.07	0.057	0.057	0.062	0.058	0.359	0.174	0.035	0.106	0.052	0.087	0.03	0.121	0.079	0.08
cg08835113	0.045	0.049	0.039	0.038	0.038	0.036	0.299	0.21	0.033	0.137	0.069	0.071	0.031	0.074	0.05	0.058
cg13974464	0.153	0.194	0.221	0.176	0.242	0.218	0.485	0.096	0.013	0.033	0.018	0.197	0.016	0.012	0.016	0.013
cg03036557	0.015	0.054	0.032	0.016	0.049	0.017	0.217	0.241	0.006	0.166	0.016	0.046	0.027	0.007	0.014	0.021
cg12678562	0.011	0.051	0.035	0.015	0.041	0.014	0.208	0.221	0.023	0.148	0.025	0.055	0.025	0.012	0.018	0.014
cg10548038	0.015	0.032	0.024	0.008	0.025	0.011	0.089	0.17	0.003	0.1	0.002	0.031	0.011	0.001	0.004	0
cg13744663	0.026	0.035	0.04	0.025	0.043	0.024	0.091	0.099	0.019	0.136	0.024	0.046	0.028	0.039	0.023	0.037
cg05472468	0.016	0.035	0.032	0.018	0.066	0.014	0.427	0.391	0.088	0.599	0.037	0.064	0.012	0.019	0.023	0.016
cg01490094	0.048	0.095	0.097	0.065	0.132	0.049	0.407	0.348	0.128	0.551	0.071	0.091	0.046	0.075	0.063	0.093
cg00740088	0.07	0.151	0.124	0.081	0.147	0.075	0.622	0.27	0.082	0.688	0.113	0.109	0.042	0.032	0.055	0.058
cg17982497	0.052	0.078	0.064	0.054	0.07	0.053	0.657	0.594	0.122	0.613	0.053	0.084	0.05	0.054	0.124	0.15
cg24311272	0.026	0.027	0.056	0.022	0.039	0.029	0.315	0.202	0.01	0.077	0.339	0.069	0.031	0.045	0.035	0.056
cg09508531	0.017	0.032	0.022	0.015	0.024	0.016	0.254	0.261	0.028	0.215	0.055	0.084	0.02	0.022	0.026	0.022
cg10480584	0.07	0.129	0.157	0.083	0.147	0.052	0.179	0.314	0.228	0.401	0.1	0.153	0.066	0.086	0.092	0.084
cg14517743	0.028	0.036	0.064	0.041	0.144	0.03	0.464	0.213	0.019	0.661	0.022	0.053	0.055	0.077	0.066	0.062
cg10171357	0.069	0.144	0.106	0.074	0.125	0.065	0.692	0.491	0.148	0.572	0.114	0.099	0.08	0.107	0.187	0.276
cg04854226	0.066	0.122	0.101	0.063	0.107	0.065	0.723	0.335	0.228	0.675	0.047	0.09	0.088	0.09	0.158	0.22
cg10606240	0.049	0.073	0.065	0.046	0.067	0.051	0.647	0.377	0.74	0.249	0.087	0.075	0.192	0.046	0.065	0.019
cg03036557	0.015	0.054	0.032	0.016	0.049	0.017	0.217	0.241	0.006	0.166	0.016	0.046	0.027	0.007	0.014	0.021
cg12678562	0.011	0.051	0.035	0.015	0.041	0.014	0.208	0.221	0.023	0.148	0.025	0.055	0.025	0.012	0.018	0.014
cg10548038	0.015	0.032	0.024	0.008	0.025	0.011	0.089	0.17	0.003	0.1	0.002	0.031	0.011	0.001	0.004	0
cg08128768	0.008	0.008	0.035	0.007	0.02	0.006	0.399	0.082	0.038	0.036	0.568	0.038	0.017	0.057	0.018	0.017
cg24794433	0.06	0.059	0.095	0.064	0.078	0.053	0.491	0.124	0.06	0.101	0.492	0.134	0.082	0.127	0.061	0.089
cg01978368	0.034	0.035	0.04	0.039	0.04	0.033	0.278	0.129	0.039	0.091	0.189	0.042	0.086	0.06	0.05	0.041
cg01411786	0.018	0.031	0.025	0.021	0.036	0.02	0.398	0.326	0.3	0.302	0.075	0.077	0.013	0.041	0.022	0.057
cg12219325	0.026	0.06	0.036	0.027	0.03	0.029	0.443	0.227	0.085	0.656	0.041	0.042	0.065	0.046	0.106	0.046
cg10589443	0.008	0.017	0.218	0.026	0.301	0.013	0.403	0.502	0.008	0.084	0.018	0.055	0.088	0.022	0.02	0.004
cg06133110	0.061	0.128	0.408	0.129	0.492	0.048	0.574	0.578	0.044	0.119	0.059	0.122	0.282	0.09	0.059	0.058
cg23881926	0.004	0.058	0.018	0.008	0.015	0.01	0.556	0.456	0.017	0.843	0.007	0.025	0.064	0.012	0.12	0.033
cg01602153	0.005	0.049	0.015	0.007	0.015	0.014	0.459	0.471	0.023	0.787	0.009	0.029	0.037	0.007	0.099	0.021
cg23414876	0.049	0.067	0.063	0.052	0.075	0.05	0.399	0.413	0.066	0.087	0.058	0.128	0.069	0.069	0.067	0.068
cg00723994	0.023	0.106	0.044	0.026	0.067	0.023	0.636	0.861	0.016	0.91	0.013	0.089	0.005	0.009	0.019	0.013
cg18569335	0.022	0.133	0.069	0.039	0.059	0.016	0.209	0.285	0.048	0.277	0.11	0.041	0.081	0.111	0.065	0.075
cg04368796	0.008	0.092	0.037	0.011	0.029	0.009	0.268	0.246	0.021	0.261	0.073	0.012	0.037	0.044	0.031	0.027
cg15673540	0.12	0.181	0.148	0.122	0.158	0.116	0.167	0.158	0.132	0.607	0.168	0.166	0.49	0.41	0.341	0.348
cg24438423	0.094	0.185	0.131	0.104	0.134	0.094	0.147	0.145	0.095	0.405	0.064	0.127	0.422	0.313	0.176	0.23
cg23986145	0.064	0.122	0.07	0.058	0.069	0.06	0.123	0.135	0.062	0.337	0.078	0.104	0.301	0.182	0.109	0.095
cg22892607	0.059	0.074	0.062	0.058	0.071	0.064	0.578	0.227	0.191	0.353	0.248	0.103	0.074	0.089	0.208	0.153
cg01697719	0.006	0.052	0.01	0.007	0.01	0.006	0.511	0.122	0.069	0.808	0.028	0.027	0.012	0.085	0.364	0.2
cg12396523	0.026	0.081	0.127	0.072	0.207	0.03	0.335	0.098	0.164	0.076	0.059	0.133	0.03	0.035	0.026	0.024
cg26708220	0.024	0.087	0.035	0.024	0.045	0.016	0.622	0.819	0.159	0.726	0.071	0.063	0.041	0.033	0.034	0.05
cg07056644	0.057	0.102	0.078	0.055	0.078	0.049	0.48	0.505	0.047	0.369	0.042	0.106	0.021	0.037	0.122	0.051
cg11586448	0.044	0.044	0.049	0.039	0.032	0.045	0.653	0.145	0.556	0.177	0.091	0.056	0.603	0.287	0.113	0.064
cg01579535	0.087	0.105	0.106	0.098	0.105	0.103	0.382	0.476	0.062	0.12	0.163	0.107	0.119	0.13	0.117	0.118
cg02264990	0.017	0.025	0.033	0.014	0.025	0.017	0.372	0.609	0.049	0.386	0.069	0.031	0.008	0.02	0.015	0.022
cg03923561	0.041	0.05	0.065	0.052	0.057	0.044	0.471	0.668	0.038	0.607	0.113	0.079	0.092	0.11	0.092	0.095
cg09720701	0.051	0.053	0.061	0.054	0.057	0.054	0.425	0.569	0.051	0.094	0.071	0.075	0.105	0.097	0.081	0.085
cg19437868	0.039	0.047	0.04	0.038	0.045	0.036	0.312	0.077	0.09	0.31	0.065	0.115	0.066	0.058	0.052	0.048
cg03615269	0.029	0.041	0.071	0.04	0.135	0.032	0.281	0.029	0.291	0.049	0.113	0.054	0.039	0.026	0.032	0.034
cg10383447	0.004	0.004	0.002	0.003	0.004	0.006	0.25	0.07	0.011	0.747	0.009	0.013	0.006	0.004	0.017	0.005
cg08101303	0.013	0.022	0.013	0.01	0.013	0.01	0.221	0.176	0.028	0.388	0.038	0.041	0.009	0.006	0.018	0.018
cg02101486	0.046	0.061	0.047	0.044	0.056	0.037	0.329	0.121	0.092	0.285	0.125	0.062	0.061	0.041	0.058	0.061
cg21800284	0.14	0.174	0.157	0.151	0.153	0.143	0.686	0.605	0.145	0.206	0.087	0.21	0.052	0.062	0.124	0.082
cg20889818	0.021	0.073	0.048	0.024	0.069	0.029	0.53	0.47	0.036	0.819	0.009	0.067	0.027	0.027	0.108	0.1
cg08101303	0.013	0.022	0.013	0.01	0.013	0.01	0.221	0.176	0.028	0.388	0.038	0.041	0.009	0.006	0.018	0.018
cg02101486	0.046	0.061	0.047	0.044	0.056	0.037	0.329	0.121	0.092	0.285	0.125	0.062	0.061	0.041	0.058	0.061
cg14204784	0.043	0.121	0.096	0.041	0.108	0.05	0.599	0.861	0.04	0.605	0.055	0.119	0.021	0.006	0.005	0.013
cg15299510	0.056	0.051	0.062	0.045	0.071	0.061	0.38	0.074	0.073	0.087	0.312	0.091	0.128	0.115	0.084	0.081
cg01579535	0.087	0.105	0.106	0.098	0.105	0.103	0.382	0.476	0.062	0.12	0.163	0.107	0.119	0.13	0.117	0.118
cg02264990	0.017	0.025	0.033	0.014	0.025	0.017	0.372	0.609	0.049	0.386	0.069	0.031	0.008	0.02	0.015	0.022
cg09720701	0.051	0.053	0.061	0.054	0.057	0.054	0.425	0.569	0.051	0.094	0.071	0.075	0.105	0.097	0.081	0.085
cg23166970	0.024	0.05	0.086	0.099	0.082	0.026	0.223	0.096	0.036	0.066	0.032	0.057	0.046	0.051	0.029	0.04
cg03344955	0.043	0.062	0.16	0.14	0.19	0.047	0.172	0.116	0.042	0.106	0.08	0.075	0.081	0.078	0.046	0.072
cg08561732	0.094	0.138	0.113	0.08	0.124	0.082	0.657	0.398	0.227	0.493	0.082	0.124	0.084	0.083	0.153	0.177
cg16480692	0.024	0.037	0.028	0.024	0.022	0.025	0.139	0.087	0.006	0.089	0.006	0.063	0.045	0.021	0.02	0.025
cg17160984	0.031	0.117	0.041	0.029	0.075	0.022	0.562	0.738	0.026	0.731	0.03	0.124	0.013	0.048	0.068	0.022
cg10128894	0.036	0.04	0.045	0.039	0.047	0.035	0.235	0.181	0.051	0.112	0.071	0.047	0.027	0.038	0.065	0.057
cg09385093	0.025	0.113	0.032	0.023	0.034	0.021	0.34	0.703	0.017	0.104	0.007	0.073	0.027	0.025	0.041	0.05
cg23929284	0.021	0.022	0.021	0.029	0.032	0.028	0.401	0.134	0.193	0.791	0.026	0.082	0.011	0.075	0.03	0.039
cg16620392	0.013	0.066	0.035	0.015	0.049	0.014	0.365	0.556	0.037	0.407	0.041	0.068	0.006	0.025	0.051	0.017
cg10171357	0.069	0.144	0.106	0.074	0.125	0.065	0.692	0.491	0.148	0.572	0.114	0.099	0.08	0.107	0.187	0.276
cg04854226	0.066	0.122	0.101	0.063	0.107	0.065	0.723	0.335	0.228	0.675	0.047	0.09	0.088	0.09	0.158	0.22
cg12777520	0.069	0.127	0.084	0.082	0.128	0.058	0.494	0.685	0.054	0.288	0.058	0.138	0.022	0.041	0.032	0.034
cg00400832	0.054	0.098	0.072	0.06	0.091	0.054	0.364	0.26	0.032	0.361	0.052	0.101	0.022	0.06	0.041	0.043
cg22392666	0.029	0.054	0.055	0.041	0.058	0.037	0.473	0.605	0.01	0.572	0.043	0.103	0.057	0.056	0.054	0.051
cg08512490	0.054	0.047	0.054	0.044	0.049	0.044	0.229	0.083	0.035	0.09	0.048	0.056	0.07	0.058	0.085	0.068
cg08144675	0.006	0.032	0.013	0.005	0.017	0.005	0.495	0.789	0.075	0.604	0.068	0.083	0.024	0.035	0.066	0.109
cg02221347	0.026	0.027	0.028	0.022	0.026	0.025	0.118	0.09	0.022	0.673	0.036	0.032	0.041	0.035	0.049	0.028
cg18110444	0.001	0.005	0.004	0.003	0.003	0.003	0.434	0.212	0.011	0.936	0.002	0.019	0.168	0.124	0.156	0.053
cg23996306	0.046	0.047	0.047	0.042	0.046	0.043	0.1	0.063	0.052	0.467	0.052	0.078	0.066	0.067	0.076	0.063
cg20575277	0.05	0.052	0.059	0.058	0.054	0.051	0.326	0.157	0.052	0.281	0.058	0.074	0.06	0.088	0.114	0.07
cg10102418	0.045	0.058	0.058	0.05	0.05	0.045	0.234	0.074	0.055	0.077	0.057	0.075	0.061	0.07	0.07	0.071
cg27509306	0.055	0.078	0.071	0.054	0.059	0.051	0.222	0.079	0.064	0.084	0.068	0.095	0.074	0.084	0.083	0.079
cg16594139	0.083	0.095	0.052	0.058	0.05	0.064	0.356	0.397	0.076	0.081	0.091	0.075	0.038	0.085	0.061	0.102
cg26267310	0.096	0.095	0.062	0.067	0.064	0.084	0.438	0.568	0.092	0.08	0.091	0.098	0.054	0.121	0.124	0.164
cg14494620	0.072	0.156	0.123	0.076	0.146	0.058	0.747	0.61	0.179	0.825	0.104	0.17	0.031	0.043	0.207	0.151
cg05994244	0.135	0.173	0.153	0.163	0.17	0.118	0.616	0.563	0.198	0.716	0.113	0.204	0.076	0.117	0.227	0.195
cg02824888	0.166	0.189	0.125	0.216	0.12	0.209	0.643	0.762	0.142	0.087	0.151	0.219	0.027	0.037	0.055	0.041
cg24095592	0.028	0.081	0.11	0.041	0.186	0.028	0.335	0.144	0.026	0.507	0.039	0.065	0.023	0.015	0.027	0.009
cg13060154	0.044	0.063	0.099	0.047	0.06	0.043	0.369	0.097	0.074	0.095	0.408	0.144	0.078	0.098	0.052	0.069
cg09248054	0.009	0.015	0.008	0.012	0.012	0.01	0.487	0.214	0.02	0.929	0.006	0.054	0.019	0	0.015	0.028
cg16318112	0.032	0.04	0.034	0.046	0.042	0.038	0.435	0.21	0.05	0.939	0.093	0.069	0.046	0.031	0.03	0.042
cg13580767	0.015	0.013	0.012	0.008	0.013	0.014	0.026	1	0.007	0.037	0.021	0.02	0.023	0.023	0.003	0.019
cg07696033	0.007	0.015	0.009	0.008	0.013	0.005	0.031	0.593	0.033	0.141	0.033	0.016	0.007	0.017	0	0.018
cg01751134	0.008	0.021	0.005	0.007	0.008	0.01	0.008	0.368	0.004	0.042	0.006	0.063	0	0.016	0.012	0.012
cg24703804	0.002	0.003	0.004	0.005	0.002	0	0.002	0.139	0.002	0.058	0.001	0	0	0.007	0	0.003
cg06277900	0.01	0.016	0.015	0.01	0.019	0.013	0.07	0.481	0.006	0.046	0.008	0.05	0.019	0.011	0.019	0.011
cg20686479	0.011	0.031	0.027	0.017	0.031	0.015	0.009	0.505	0.01	0.073	0.004	0.051	0.024	0.014	0.026	0.018
cg03919694	0.017	0.065	0.019	0.01	0.035	0.013	0.013	0.568	0.002	0.043	0.002	0.155	0.015	0.007	0.01	0.005
cg05701676	0.01	0.005	0.003	0.003	0.003	0.007	0.009	0.166	0.007	0.055	0	0	0.004	0.011	0.007	0.002
cg18831738	0.005	0.003	0.007	0.005	0.004	0.006	0.008	0.137	0.003	0.039	0.001	0	0.01	0.011	0	0.005
cg02314846	0.003	0.001	0.004	0.003	0.003	0.001	0.003	0.116	0.005	0.068	0	0.001	0	0.002	0	0
cg01640606	0.017	0.081	0.022	0.014	0.04	0.011	0.067	0.679	0.046	0.168	0.037	0.042	0	0.005	0.001	0.017
cg23052830	0.07	0.143	0.066	0.077	0.079	0.072	0.169	0.644	0.08	0.211	0.121	0.096	0.056	0.07	0.065	0.063
cg11702455	0.007	0.007	0.006	0.004	0.007	0.005	0.015	0.195	0.003	0.085	0	0	0.009	0.002	0.014	0.001
cg25147866	0.004	0.005	0.007	0.007	0.005	0.004	0.031	0.165	0.007	0.049	0	0.002	0.006	0.002	0.002	0.007
cg02925840	0.005	0.007	0.009	0.009	0.006	0.01	0.033	0.158	0.008	0.062	0.027	0.001	0.006	0.02	0.004	0.012
cg17220042	0.006	0.006	0.007	0.01	0.008	0.005	0.008	0.178	0.005	0.031	0.002	0.007	0.022	0.014	0.013	0.008
cg10773670	0.053	0.054	0.055	0.046	0.056	0.05	0.055	1	0.041	0.075	0.052	0.068	0.061	0.071	0.055	0.067
cg12601414	0.004	0.002	0.004	0.005	0.007	0.003	0.012	0.161	0.005	0.046	0.014	0.01	0	0.013	0.008	0.007
cg13195796	0.004	0.009	0.009	0.006	0.005	0.005	0.004	0.145	0.002	0.04	0.012	0	0.011	0.012	0.001	0.006
cg10430904	0.004	0.007	0.009	0.009	0.012	0.005	0.005	0.181	0.007	0.057	0	0.008	0.008	0.006	0.017	0.006
cg18944910	0.006	0.005	0.009	0.007	0.005	0.007	0.024	0.177	0.004	0.062	0	0.004	0.016	0.002	0	0.004
cg26143326	0.009	0.01	0.011	0.009	0.01	0.008	0.007	0.164	0.013	0.038	0.007	0.002	0.003	0.004	0.012	0.005
cg23490161	0.137	0.167	0.123	0.185	0.122	0.128	0.283	0.186	0.123	0.45	0.356	0.01	0.019	0.015	0.013	0.015
cg15256164	0.005	0.005	0.004	0.002	0.003	0.003	0.027	0.225	0.009	0.081	0	0.015	0.006	0.022	0.007	0.017
cg03866757	0.005	0.007	0.004	0.006	0.006	0.011	0.019	0.163	0.005	0.053	0.007	0.006	0.001	0.005	0.011	0.005
cg07057042	0.008	0.007	0.009	0.004	0.006	0.005	0.022	0.17	0.005	0.089	0	0	0.003	0	0.001	0
cg25538602	0.006	0.009	0.011	0.006	0.008	0.009	0.006	0.136	0.008	0.036	0.005	0.007	0.006	0	0.003	0.008
cg06081609	0.003	0.014	0.01	0.008	0.014	0.005	0.001	0.163	0.007	0.068	0	0.017	0.006	0	0.001	0.002
cg14162912	0.013	0.01	0.01	0.011	0.015	0.012	0.026	0.247	0.016	0.074	0.011	0	0	0.018	0.018	0.003
cg07805699	0.008	0.006	0.005	0.008	0.006	0.006	0.014	0.167	0.008	0.072	0	0.014	0	0.008	0	0.008
cg10817500	0.006	0.004	0.006	0.006	0.007	0.007	0.012	0.137	0.009	0.032	0.01	0	0.002	0.01	0.01	0.009
cg21163960	0.014	0.016	0.015	0.011	0.017	0.019	0.065	0.765	0.022	0.422	0.015	0.002	0.03	0.013	0.035	0.041
cg13432616	0.004	0.005	0.006	0.006	0.003	0.007	0.032	0.149	0.006	0.049	0.013	0	0.003	0.005	0.002	0.003
cg24891986	0.005	0.007	0.007	0.007	0.005	0.004	0.01	0.159	0.007	0.058	0.012	0.015	0.003	0.005	0.003	0.005
cg26567712	0.007	0.006	0.005	0.007	0.005	0.006	0.009	0.13	0.002	0.054	0.006	0	0	0.001	0.008	0.012
cg19977964	0.018	0.024	0.021	0.019	0.023	0.021	0.045	0.208	0.039	0.073	0.065	0.03	0.018	0.018	0.019	0.026
cg21599089	0.003	0.005	0.005	0.005	0.007	0.005	0.008	0.146	0.007	0.05	0	0.02	0.014	0.004	0.003	0.007
cg05619888	0.009	0.012	0.008	0.006	0.006	0.007	0.011	0.175	0.008	0.034	0	0.052	0.002	0.007	0.006	0.005
cg07816687	0.028	0.055	0.043	0.042	0.064	0.032	0.418	0.601	0.009	0.044	0.014	0.063	0.034	0.043	0.076	0.063
cg05436064	0.006	0.014	0.012	0.007	0.027	0.009	0.308	0.53	0.002	0.061	0.024	0.027	0	0.022	0.001	0.007
cg09030672	0.069	0.075	0.072	0.067	0.084	0.063	0.362	0.456	0.089	0.118	0.072	0.09	0.072	0.053	0.072	0.081
cg02060408	0.002	0.004	0.003	0.003	0.004	0.001	0.009	0.156	0.005	0.074	0	0.007	0.003	0.003	0.022	0.013
cg23123540	0.005	0.005	0.005	0.005	0.004	0.004	0.008	0.134	0.015	0.052	0.007	0	0.008	0.012	0	0.003
cg08904082	0.005	0.004	0.008	0.007	0.01	0.005	0.012	0.145	0.002	0.044	0.003	0.013	0.005	0.014	0.002	0.011
cg14270348	0.01	0.052	0.017	0.007	0.021	0.01	0.021	0.331	0.003	0.023	0.004	0.117	0.019	0.006	0.016	0.006
cg13219564	0.008	0.007	0.006	0.008	0.006	0.007	0.02	0.145	0.003	0.061	0.001	0.005	0.002	0.009	0.003	0
cg24201964	0.008	0.009	0.009	0.01	0.009	0.006	0.011	0.151	0.006	0.055	0	0.006	0.004	0.002	0.013	0.006
cg21252276	0.011	0.013	0.013	0.008	0.007	0.015	0.013	0.203	0.008	0.051	0.032	0.004	0.008	0.014	0.002	0.011
cg05888082	0.007	0.009	0.009	0.008	0.005	0.004	0.025	0.173	0.003	0.058	0	0.009	0.013	0.007	0.009	0.013
cg06458732	0.008	0.003	0.006	0.004	0.006	0.006	0.009	0.132	0.009	0.055	0.01	0.001	0.009	0.008	0	0.002
cg09758623	0.007	0.005	0.003	0.007	0.007	0.005	0.016	0.167	0.004	0.06	0.003	0.01	0.023	0.009	0.005	0.008
cg23984997	0.012	0.011	0.008	0.009	0.007	0.012	0.021	0.14	0.007	0.078	0	0.003	0.031	0.023	0.02	0.009
cg27537561	0.004	0.003	0.007	0.007	0.006	0.003	0.008	0.13	0.003	0.061	0	0	0	0.018	0.003	0.012
cg10805483	0.003	0.005	0.009	0.004	0.006	0.002	0.007	0.128	0.006	0.066	0.004	0	0.008	0.011	0.003	0.002
cg09738429	0.008	0.006	0.004	0.004	0.005	0.004	0.021	0.163	0.006	0.061	0	0.003	0.023	0.013	0.012	0
cg13785949	0.003	0.004	0.006	0.005	0.005	0.007	0.015	0.124	0.003	0.059	0	0.005	0	0.002	0.012	0.004
cg25845331	0.007	0.008	0.011	0.007	0.006	0.011	0.021	0.196	0.014	0.055	0.029	0	0.016	0.005	0.014	0.009
cg16706559	0.006	0.005	0.007	0.004	0.005	0.003	0.009	0.151	0.003	0.075	0.018	0.004	0	0.008	0.002	0.012
cg26383936	0.005	0.006	0.006	0.004	0.007	0.008	0.012	0.151	0.002	0.045	0.009	0.008	0.002	0.023	0.008	0.015
cg22373079	0.004	0.004	0.008	0.008	0.002	0.004	0.025	0.139	0.001	0.064	0.003	0	0.001	0.01	0.007	0.006
cg22615819	0.002	0.011	0.006	0.005	0.007	0.005	0.01	0.123	0.005	0.06	0	0.006	0.004	0.004	0	0.008
cg09863749	0.005	0.008	0.007	0.008	0.003	0.009	0.034	0.179	0.011	0.065	0.002	0	0.001	0.016	0.016	0.016
cg23076086	0.009	0.009	0.005	0.005	0.004	0.007	0.014	0.138	0.009	0.054	0.01	0.003	0.01	0.003	0.008	0.001
cg19294256	0.006	0.006	0.006	0.005	0.002	0.006	0.006	0.141	0.006	0.078	0	0.001	0.002	0.006	0.008	0.015
cg25845331	0.007	0.008	0.011	0.007	0.006	0.011	0.021	0.196	0.014	0.055	0.029	0	0.016	0.005	0.014	0.009
cg16706559	0.006	0.005	0.007	0.004	0.005	0.003	0.009	0.151	0.003	0.075	0.018	0.004	0	0.008	0.002	0.012
cg09965679	0.005	0.003	0.002	0.002	0.009	0.005	0.011	0.145	0.004	0.091	0	0.002	0.008	0	0.015	0.002
cg11492041	0.009	0.007	0.009	0.014	0.005	0.008	0.017	0.14	0.009	0.051	0.005	0.009	0	0.01	0	0.002
cg11869215	0.006	0.005	0.003	0.004	0.006	0.005	0.033	0.161	0.014	0.058	0.02	0	0.003	0.013	0	0.008
cg11926764	0.005	0.009	0.013	0.006	0.011	0.011	0.026	0.149	0.006	0.05	0.007	0	0.008	0.002	0.004	0.006
cg26134152	0.011	0.007	0.008	0.008	0.009	0.011	0.014	0.171	0.011	0.05	0.003	0.024	0.001	0.007	0.009	0.018
cg13628971	0.011	0.009	0.008	0.008	0.01	0.009	0.016	0.157	0.005	0.06	0.008	0.005	0.005	0.017	0.004	0
cg19261559	0.005	0.003	0.007	0.007	0.006	0.004	0.03	0.155	0.006	0.046	0	0.006	0.006	0.001	0.033	0.011
cg08243963	0.005	0.001	0.004	0.006	0.003	0.001	0.006	0.124	0.006	0.089	0.009	0.001	0.006	0.001	0.001	0
cg22615819	0.002	0.011	0.006	0.005	0.007	0.005	0.01	0.123	0.005	0.06	0	0.006	0.004	0.004	0	0.008
cg09863749	0.005	0.008	0.007	0.008	0.003	0.009	0.034	0.179	0.011	0.065	0.002	0	0.001	0.016	0.016	0.016
cg13161961	0.015	0.024	0.05	0.02	0.063	0.015	0.026	0.307	0.004	0.06	0	0.041	0.002	0.008	0.008	0.009
cg08790212	0.011	0.011	0.012	0.009	0.008	0.008	0.011	0.148	0.005	0.035	0.007	0.014	0.008	0.011	0.01	0.008
cg20198948	0.039	0.041	0.048	0.042	0.04	0.044	0.045	0.241	0.021	0.09	0.015	0.022	0.052	0.028	0.042	0.047
cg09152955	0.005	0.005	0.01	0.006	0.006	0.005	0.026	0.139	0.009	0.053	0.001	0.004	0.003	0.014	0.008	0
cg02767296	0.008	0.009	0.005	0.009	0.012	0.008	0.022	0.155	0.005	0.066	0	0.014	0.015	0.001	0.002	0.003
cg26447968	0.006	0.005	0.009	0.008	0.011	0.009	0	0.172	0.006	0.055	0.003	0.016	0.006	0.037	0.017	0.009
cg11858474	0.017	0.013	0.015	0.011	0.013	0.014	0.004	0.186	0.013	0.038	0.003	0.016	0.012	0.008	0.023	0.015
cg16098780	0.029	0.03	0.036	0.024	0.026	0.032	0.009	0.178	0.029	0.046	0.011	0.024	0.018	0.01	0.028	0.01
cg03725130	0.006	0.009	0.011	0.007	0.007	0.008	0.014	0.158	0.008	0.032	0.006	0.025	0.014	0.009	0.012	0.014
cg14371107	0.023	0.024	0.03	0.03	0.017	0.019	0.042	0.326	0.014	0.1	0.005	0	0.025	0.009	0.014	0.027
cg19489111	0.008	0.01	0.009	0.005	0.011	0.009	0.027	0.216	0.025	0.088	0	0.018	0.017	0.012	0.007	0.004
cg17576266	0.01	0.008	0.012	0.007	0.015	0.013	0.004	0.196	0.016	0.096	0	0	0.014	0.016	0.012	0.005
cg03419885	0.018	0.045	0.034	0.024	0.043	0.021	0.028	0.461	0.008	0.067	0.076	0.062	0.016	0.016	0	0.078
cg00737840	0.067	0.122	0.103	0.066	0.123	0.061	0.065	0.362	0.061	0.234	0.174	0.125	0.058	0.074	0.073	0.139
cg12965799	0.002	0.008	0.005	0.004	0.006	0.004	0.007	0.123	0.004	0.073	0.007	0.008	0.002	0.001	0.004	0.01
cg15421984	0.011	0.011	0.009	0.013	0.009	0.006	0.029	0.168	0.009	0.053	0.004	0.002	0.011	0.01	0.001	0.021
cg18764516	0.026	0.035	0.033	0.036	0.029	0.032	0.065	0.165	0.014	0.061	0.027	0.041	0.049	0.049	0.05	0.04
cg01997529	0.006	0.008	0.01	0.012	0.012	0.01	0.019	0.144	0.012	0.062	0.01	0	0.002	0.001	0.006	0
cg02659673	0.008	0.006	0.009	0.005	0.009	0.009	0.033	0.159	0.008	0.074	0	0	0.004	0.006	0.009	0.008
cg18774755	0.006	0.01	0.012	0.007	0.015	0.01	0.015	0.192	0.014	0.095	0.004	0.032	0.009	0.004	0.027	0.02
cg23517607	0.009	0.006	0.01	0.006	0.007	0.004	0.018	0.178	0.01	0.088	0.007	0.015	0.01	0.013	0.003	0.006
cg05741611	0.028	0.025	0.025	0.025	0.026	0.024	0.038	0.244	0.022	0.089	0.019	0.024	0.044	0.047	0.052	0.053
cg01573825	0.008	0.008	0.012	0.006	0.007	0.009	0.044	0.225	0.014	0.079	0.018	0.015	0.004	0.005	0.03	0.011
cg12414872	0.119	0.135	0.132	0.12	0.115	0.112	0.125	0.25	0.068	0.154	0.124	0.137	0.147	0.151	0.147	0.155
cg19732171	0.007	0.008	0.01	0.009	0.009	0.009	0.016	0.15	0.009	0.063	0	0.016	0	0.011	0	0.013
cg15927720	0.013	0.104	0.033	0.011	0.059	0.007	0.007	0.062	0.004	0.023	0.007	0.183	0.014	0.008	0.006	0.01
cg02403292	0.019	0.015	0.012	0.007	0.027	0.017	0.045	0.215	0.039	0.038	0.004	0.017	0.009	0.005	0.002	0.002
cg14658804	0.018	0.151	0.066	0.031	0.114	0.019	0.026	0.084	0.004	0.129	0.005	0.191	0.02	0.016	0.009	0.023
cg26492514	0.097	0.245	0.198	0.11	0.249	0.086	0.114	0.103	0.071	0.103	0.131	0.237	0.087	0.09	0.102	0.093
cg11776676	0.006	0.016	0.014	0.009	0.014	0.013	0.024	0.193	0.007	0.083	0.007	0	0.003	0.026	0.009	0.002
cg00843105	0.007	0.012	0.009	0.012	0.016	0.011	0.009	0.177	0.013	0.062	0.012	0.015	0.003	0.015	0.01	0.009
cg27063720	0.009	0.013	0.011	0.011	0.014	0.01	0.041	0.208	0.019	0.067	0	0.025	0.026	0.001	0	0.004
cg26294217	0.005	0.007	0.004	0.009	0.005	0.007	0.02	0.167	0.006	0.065	0.003	0.031	0.011	0.004	0.016	0.005
cg14789928	0.004	0.007	0.006	0.005	0.004	0.009	0.013	0.142	0.005	0.07	0.001	0.007	0.009	0.005	0.014	0.015
cg12262681	0.008	0.008	0.006	0.013	0.006	0.009	0.018	0.164	0.009	0.085	0	0.005	0.005	0.014	0.006	0.008
cg07027912	0.018	0.022	0.028	0.015	0.018	0.019	0.036	0.123	0.041	0.125	0.023	0.032	0.025	0	0.028	0.023
cg06382459	0.022	0.024	0.03	0.024	0.024	0.032	0.041	0.141	0.005	0.057	0	0.023	0.051	0.034	0.021	0.032
cg17422926	0.009	0.009	0.009	0.009	0.009	0.01	0.01	0.136	0.003	0.043	0.005	0.014	0.01	0.006	0.012	0.006
cg25803693	0.011	0.012	0.009	0.011	0.01	0.013	0.04	0.217	0.009	0.077	0.006	0.015	0.003	0.032	0.007	0.008
cg01903903	0.023	0.025	0.032	0.028	0.026	0.029	0.048	0.253	0.013	0.082	0.011	0.049	0.023	0.031	0.045	0.04
cg21680208	0.02	0.022	0.032	0.032	0.027	0.03	0.048	0.207	0.014	0.118	0.008	0.026	0.048	0.049	0.038	0.04
cg05586242	0.005	0.007	0.006	0.007	0.007	0.008	0.019	0.158	0.01	0.066	0	0.012	0.013	0.018	0.005	0.009
cg03078363	0.031	0.085	0.051	0.03	0.078	0.024	0.116	0.844	0.014	0.405	0.005	0.104	0.028	0.01	0.036	0.012
cg01961137	0.013	0.009	0.01	0.006	0.013	0.012	0.016	0.167	0.003	0.062	0	0.021	0.011	0.007	0.007	0.015
cg05795157	0.011	0.008	0.012	0.008	0.008	0.014	0.025	0.162	0.002	0.065	0	0.017	0.011	0.012	0.002	0.003
cg24675658	0.005	0.004	0.007	0.006	0.005	0.006	0.014	0.154	0.006	0.057	0.002	0.019	0.023	0	0.012	0.021
cg16325326	0.041	0.045	0.047	0.042	0.041	0.026	0.07	0.163	0.037	0.155	0.036	0.045	0.045	0.102	0.054	0.098
cg20554228	0.012	0.019	0.014	0.013	0.013	0.011	0.02	0.144	0.016	0.128	0.012	0.033	0.019	0.019	0.008	0.015
cg10639440	0.008	0.006	0.009	0.006	0.005	0.007	0.011	0.147	0.011	0.046	0.001	0.024	0.027	0.007	0.002	0.01
cg09022163	0.005	0.007	0.009	0.008	0.011	0.008	0.012	0.134	0.004	0.043	0.004	0.007	0.008	0.02	0.016	0.003
cg01343206	0.007	0.006	0.011	0.005	0.003	0.008	0.02	0.176	0.003	0.089	0	0.008	0.016	0.02	0.014	0.005
cg05401447	0.005	0.005	0.005	0.002	0.005	0.003	0.004	0.042	0.809	0.04	0.034	0.007	0.006	0.021	0	0.008
cg06772157	0.063	0.069	0.073	0.061	0.069	0.067	0.083	0.087	0.424	0.089	0.136	0.1	0.091	0.117	0.111	0.11
cg05330668	0.007	0.007	0.004	0.007	0.008	0.007	0.01	0.1	0.928	0.087	0.098	0.002	0	0.005	0.014	0.01
cg03577460	0.047	0.044	0.051	0.056	0.059	0.054	0.044	0.299	0.844	0.152	0.16	0.07	0.032	0.033	0.062	0.05
cg15346168	0.02	0.017	0.048	0.032	0.113	0.019	0.02	0.071	0.83	0.053	0.045	0.025	0.019	0.019	0.026	0.024
cg25076767	0.009	0.009	0.017	0.011	0.026	0.01	0.009	0.045	0.714	0.047	0.035	0.01	0.037	0.008	0.019	0.007
cg22194948	0.005	0.006	0.006	0.005	0.006	0.006	0.004	0.045	0.865	0.032	0.041	0.008	0.031	0.156	0.01	0.018
cg14149007	0.005	0.006	0.006	0.008	0.008	0.004	0.012	0.091	0.853	0.045	0.146	0.015	0.014	0.015	0.012	0.017
cg23864632	0.009	0.01	0.008	0.008	0.008	0.009	0.019	0.107	0.619	0.044	0.051	0.014	0	0.017	0.012	0.002
cg24940138	0.011	0.018	0.017	0.016	0.013	0.015	0.018	0.091	0.958	0.06	0.515	0.025	0.054	0.127	0.028	0.094
cg21211480	0.006	0.004	0.007	0.005	0.005	0.005	0.014	0.074	0.94	0.035	0.388	0.008	0.009	0.03	0.017	0.032
cg15026277	0.006	0.004	0.006	0.007	0.005	0.007	0.014	0.069	0.921	0.039	0.319	0.006	0	0.03	0.02	0.035
cg18021161	0.008	0.013	0.013	0.011	0.025	0.013	0.026	0.094	0.743	0.078	0.039	0.016	0.031	0.037	0.026	0.027
cg24740818	0.075	0.08	0.087	0.097	0.108	0.065	0.171	0.295	0.826	0.347	0.264	0.069	0.314	0.224	0.152	0.187
cg08557928	0.011	0.012	0.017	0.013	0.023	0.015	0.04	0.112	0.523	0.079	0.029	0.016	0.021	0.024	0.017	0.027
cg12471950	0.075	0.089	0.096	0.08	0.076	0.088	0.085	0.156	0.63	0.124	0.202	0.102	0.227	0.077	0.095	0.106
cg05122965	0.012	0.017	0.014	0.013	0.012	0.016	0.022	0.081	0.746	0.041	0.118	0.014	0.059	0.009	0.013	0.026
cg01799588	0.044	0.039	0.036	0.042	0.039	0.039	0.053	0.075	0.663	0.081	0.22	0.07	0.396	0.114	0.058	0.082
cg15346168	0.02	0.017	0.048	0.032	0.113	0.019	0.02	0.071	0.83	0.053	0.045	0.025	0.019	0.019	0.026	0.024
cg25076767	0.009	0.009	0.017	0.011	0.026	0.01	0.009	0.045	0.714	0.047	0.035	0.01	0.037	0.008	0.019	0.007
cg26705574	0.103	0.067	0.105	0.127	0.175	0.095	0.059	0.065	0.731	0.067	0.241	0.147	0.046	0.094	0.057	0.078
cg24940138	0.011	0.018	0.017	0.016	0.013	0.015	0.018	0.091	0.958	0.06	0.515	0.025	0.054	0.127	0.028	0.094
cg21211480	0.006	0.004	0.007	0.005	0.005	0.005	0.014	0.074	0.94	0.035	0.388	0.008	0.009	0.03	0.017	0.032
cg15026277	0.006	0.004	0.006	0.007	0.005	0.007	0.014	0.069	0.921	0.039	0.319	0.006	0	0.03	0.02	0.035
cg19548479	0.034	0.035	0.039	0.034	0.036	0.034	0.05	0.089	0.895	0.088	0.348	0.041	0.056	0.096	0.062	0.101
cg22125968	0.004	0.005	0.007	0.004	0.005	0.004	0.014	0.007	0.492	0.146	0.05	0.021	0.017	0.026	0.028	0.038
cg01536987	0.011	0.011	0.012	0.009	0.011	0.011	0.017	0.073	0.516	0.21	0.076	0.054	0.048	0.078	0.072	0.092
cg15006396	0.025	0.021	0.021	0.023	0.018	0.025	0.02	0.063	0.629	0.072	0.076	0.032	0.029	0.027	0.023	0.017
cg22437153	0.032	0.041	0.035	0.03	0.038	0.028	0.033	0.051	0.84	0.099	0.065	0.052	0.058	0.038	0.034	0.033
cg08230695	0.026	0.024	0.026	0.026	0.024	0.023	0.03	0.116	0.826	0.048	0.132	0.024	0.053	0.035	0.039	0.038
cg26721700	0.02	0.02	0.021	0.017	0.014	0.016	0.029	0.153	0.422	0.087	0.066	0.011	0.023	0.02	0.036	0.035
cg09386954	0.01	0.009	0.009	0.008	0.007	0.009	0.008	0.149	0.488	0.06	0.067	0.004	0	0.012	0.025	0.019
cg02921887	0.011	0.021	0.014	0.006	0.016	0.01	0.012	0.124	0.62	0.087	0.162	0.03	0	0.008	0.01	0
cg04951797	0.075	0.115	0.124	0.05	0.135	0.058	0.341	0.387	0.763	0.187	0.557	0.101	0.06	0.027	0.028	0.054
cg26763284	0.001	0.005	0.007	0.005	0.005	0.005	0.012	0.069	0.263	0.037	0.015	0.041	0.004	0.015	0.003	0.003
cg18021161	0.008	0.013	0.013	0.011	0.025	0.013	0.026	0.094	0.743	0.078	0.039	0.016	0.031	0.037	0.026	0.027
cg24740818	0.075	0.08	0.087	0.097	0.108	0.065	0.171	0.295	0.826	0.347	0.264	0.069	0.314	0.224	0.152	0.187
cg08557928	0.011	0.012	0.017	0.013	0.023	0.015	0.04	0.112	0.523	0.079	0.029	0.016	0.021	0.024	0.017	0.027
cg15769424	0.008	0.011	0.022	0.008	0.028	0.01	0.018	0.108	0.424	0.071	0.012	0.031	0.004	0.023	0.005	0.014
cg17445840	0.017	0.016	0.033	0.028	0.036	0.02	0.025	0.055	0.83	0.064	0.187	0.004	0.072	0.129	0.025	0.042
cg23257604	0.013	0.03	0.025	0.014	0.033	0.021	0.017	0.073	0.423	0.076	0.017	0.01	0.006	0.032	0.012	0.016
cg24008544	0.02	0.022	0.018	0.014	0.024	0.017	0.013	0.059	0.941	0.037	0.475	0.03	0.013	0.04	0.051	0.049
cg03049782	0.05	0.054	0.051	0.045	0.053	0.051	0.054	0.065	0.896	0.078	0.486	0.083	0.06	0.123	0.092	0.132
cg26090652	0.022	0.051	0.055	0.033	0.07	0.019	0.028	0.11	0.706	0.079	0.066	0.081	0.025	0.029	0.018	0.023
cg16860694	0.015	0.016	0.016	0.017	0.018	0.022	0.032	0.127	0.527	0.051	0.05	0.033	0.03	0.036	0.039	0.03
cg11260421	0.018	0.021	0.022	0.019	0.017	0.018	0.031	0.11	0.348	0.06	0.045	0.021	0.034	0.035	0.031	0.031
cg10227705	0.013	0.024	0.03	0.026	0.016	0.024	0.049	0.165	0.479	0.086	0.029	0.017	0.036	0.012	0.028	0.033
cg16559708	0.03	0.036	0.037	0.029	0.037	0.029	0.012	0.056	0.544	0.078	0.047	0.031	0.033	0.042	0.028	0.028
cg06537680	0.018	0.028	0.02	0.019	0.032	0.019	0.028	0.074	0.509	0.057	0.064	0.085	0.032	0.027	0.015	0.019
cg01855735	0.038	0.054	0.05	0.048	0.052	0.048	0.066	0.125	0.693	0.115	0.068	0.048	0.047	0.045	0.037	0.051
cg26284390	0.03	0.034	0.044	0.039	0.048	0.04	0.035	0.119	0.753	0.122	0.093	0.045	0.029	0.075	0.004	0.043
cg07323350	0.023	0.032	0.028	0.023	0.028	0.028	0.052	0.128	0.465	0.089	0.062	0.024	0.033	0.034	0.032	0.039
cg10164300	0.021	0.037	0.034	0.022	0.041	0.019	0.058	0.085	0.453	0.116	0.081	0.035	0.044	0.029	0.022	0.029
cg20554488	0.025	0.024	0.025	0.022	0.031	0.012	0.029	0.086	0.545	0.128	0.069	0.035	0.028	0.014	0.03	0.022
cg09109996	0.043	0.042	0.045	0.035	0.049	0.044	0.033	0.086	0.528	0.144	0.094	0.101	0.052	0.058	0.047	0.042
cg19258183	0.064	0.08	0.074	0.083	0.089	0.057	0.089	0.17	0.525	0.144	0.096	0.063	0.089	0.07	0.082	0.09
cg18222083	0.009	0.011	0.009	0.008	0.007	0.012	0.012	0.083	0.967	0.057	0.613	0.016	0.019	0.063	0.017	0.095
cg14138132	0.035	0.042	0.042	0.042	0.034	0.039	0.05	0.133	0.797	0.07	0.141	0.026	0.065	0.044	0.055	0.038
cg22752023	0.052	0.142	0.088	0.045	0.071	0.049	0.043	0.072	0.871	0.075	0.11	0.135	0.161	0.12	0.068	0.095
cg07931714	0.038	0.063	0.04	0.034	0.036	0.037	0.043	0.058	0.839	0.061	0.091	0.089	0.102	0.099	0.058	0.06
cg23575320	0.03	0.045	0.046	0.041	0.058	0.027	0.03	0.095	0.775	0.085	0.093	0.055	0.035	0.08	0.047	0.075
cg23696132	0.01	0.011	0.016	0.011	0.014	0.015	0.017	0.098	0.317	0.039	0.059	0.002	0.019	0.021	0.013	0.009
cg18238858	0.048	0.056	0.051	0.052	0.044	0.049	0.066	0.078	0.306	0.069	0.133	0.083	0.072	0.086	0.075	0.077
cg14023023	0.029	0.028	0.028	0.027	0.027	0.029	0.038	0.063	0.739	0.061	0.182	0.053	0.047	0.115	0.039	0.065
cg24940138	0.011	0.018	0.017	0.016	0.013	0.015	0.018	0.091	0.958	0.06	0.515	0.025	0.054	0.127	0.028	0.094
cg21211480	0.006	0.004	0.007	0.005	0.005	0.005	0.014	0.074	0.94	0.035	0.388	0.008	0.009	0.03	0.017	0.032
cg15026277	0.006	0.004	0.006	0.007	0.005	0.007	0.014	0.069	0.921	0.039	0.319	0.006	0	0.03	0.02	0.035
cg19548479	0.034	0.035	0.039	0.034	0.036	0.034	0.05	0.089	0.895	0.088	0.348	0.041	0.056	0.096	0.062	0.101
cg23275502	0.009	0.011	0.008	0.009	0.009	0.013	0.016	0.065	0.246	0.037	0.04	0.01	0.005	0.018	0.018	0.018
cg16938490	0.006	0.01	0.007	0.008	0.006	0.007	0.013	0.072	0.289	0.044	0.084	0.056	0.01	0.001	0.012	0.005
cg12930573	0.015	0.029	0.022	0.021	0.014	0.018	0.024	0.095	0.153	0.086	0.086	0.05	0.025	0.035	0.028	0.033
cg02238826	0.033	0.04	0.036	0.033	0.03	0.028	0.054	0.087	0.464	0.12	0.206	0.092	0.03	0.038	0.041	0.04
cg18732064	0.033	0.005	0.006	0.003	0.005	0.031	0.022	0.082	0.732	0.199	0.142	0.119	0.016	0.152	0.014	0.038
cg08384913	0.035	0.054	0.044	0.051	0.04	0.034	0.031	0.104	0.78	0.09	0.25	0.049	0.06	0.033	0.028	0.045
cg12293340	0.006	0.009	0.01	0.007	0.008	0.007	0.013	0.089	0.278	0.032	0.037	0.009	0.031	0.018	0.018	0.048
cg16860694	0.015	0.016	0.016	0.017	0.018	0.022	0.032	0.127	0.527	0.051	0.05	0.033	0.03	0.036	0.039	0.03
cg11260421	0.018	0.021	0.022	0.019	0.017	0.018	0.031	0.11	0.348	0.06	0.045	0.021	0.034	0.035	0.031	0.031
cg10227705	0.013	0.024	0.03	0.026	0.016	0.024	0.049	0.165	0.479	0.086	0.029	0.017	0.036	0.012	0.028	0.033
cg21185826	0.012	0.023	0.015	0.015	0.014	0.013	0.015	0.115	0.734	0.306	0.26	0.037	0.014	0.036	0.021	0.015
cg07652350	0.007	0.009	0.006	0.01	0.005	0.009	0.015	0.127	0.511	0.169	0.16	0	0.03	0.033	0.004	0.051
cg13484549	0.009	0.026	0.029	0.008	0.05	0.014	0.034	0.145	0.553	0.18	0.086	0.039	0.01	0.022	0.026	0.013
cg03559454	0.063	0.088	0.099	0.064	0.119	0.062	0.078	0.094	0.405	0.206	0.189	0.172	0.082	0.106	0.134	0.091
cg12258919	0.005	0.009	0.006	0.004	0.006	0.006	0.009	0.084	0.234	0.041	0.008	0.07	0.013	0.019	0.007	0.008
cg08543966	0.01	0.012	0.011	0.011	0.009	0.009	0.028	0.083	0.756	0.05	0.269	0.03	0.034	0.211	0.058	0.128
cg00777968	0.017	0.01	0.015	0.014	0.017	0.017	0.019	0.051	0.375	0.043	0.15	0.013	0.018	0.041	0.023	0.026
cg24625115	0.064	0.07	0.077	0.071	0.078	0.074	0.088	0.144	0.131	0.136	0.086	0.074	0.073	0.162	0.116	0.127
cg26385074	0.002	0.033	0.013	0.006	0.031	0.003	0.004	0.084	0.787	0.032	0.268	0.074	0.002	0.237	0.059	0.149
cg18643762	0.007	0.009	0.028	0.011	0.029	0.01	0.012	0.086	0.37	0.038	0.094	0.039	0.013	0.07	0	0.023
cg04749104	0.033	0.037	0.07	0.03	0.068	0.033	0.096	0.091	0.43	0.065	0.172	0.088	0.046	0.194	0.087	0.124
cg16094412	0.005	0.01	0.009	0.006	0.008	0.008	0.015	0.066	0.495	0.26	0.039	0.057	0.022	0.036	0.053	0.038
cg04658027	0.011	0.017	0.012	0.012	0.011	0.01	0.018	0.06	0.59	0.036	0.307	0.04	0.046	0.104	0.033	0.033
cg09887589	0.053	0.052	0.056	0.052	0.05	0.051	0.058	0.065	0.627	0.087	0.333	0.113	0.153	0.154	0.06	0.104
cg24940138	0.011	0.018	0.017	0.016	0.013	0.015	0.018	0.091	0.958	0.06	0.515	0.025	0.054	0.127	0.028	0.094
cg21211480	0.006	0.004	0.007	0.005	0.005	0.005	0.014	0.074	0.94	0.035	0.388	0.008	0.009	0.03	0.017	0.032
cg19548479	0.034	0.035	0.039	0.034	0.036	0.034	0.05	0.089	0.895	0.088	0.348	0.041	0.056	0.096	0.062	0.101
cg20287074	0.044	0.04	0.041	0.051	0.048	0.039	0.055	0.096	0.764	0.115	0.128	0.054	0.067	0.094	0.044	0.061
cg01855735	0.038	0.054	0.05	0.048	0.052	0.048	0.066	0.125	0.693	0.115	0.068	0.048	0.047	0.045	0.037	0.051
cg26284390	0.03	0.034	0.044	0.039	0.048	0.04	0.035	0.119	0.753	0.122	0.093	0.045	0.029	0.075	0.004	0.043
cg06415864	0.025	0.027	0.028	0.028	0.025	0.024	0.035	0.057	0.495	0.082	0.084	0.03	0.055	0.06	0.045	0.038
cg03988119	0.027	0.024	0.025	0.031	0.024	0.029	0.026	0.091	0.467	0.116	0.067	0.011	0.045	0.035	0.014	0.043
cg23477967	0.022	0.041	0.041	0.022	0.05	0.018	0.034	0.092	0.774	0.085	0.117	0.027	0.303	0.065	0.03	0.06
cg15524063	0.004	0.006	0.003	0.002	0.004	0.005	0.009	0.057	0.457	0.031	0.106	0.01	0.037	0.353	0.039	0.184
cg25385412	0.003	0.004	0.007	0.004	0.004	0.002	0.01	0.059	0.428	0.031	0.186	0.012	0.006	0.155	0.022	0.053
cg17069739	0.027	0.027	0.032	0.021	0.03	0.029	0.043	0.051	0.543	0.069	0.142	0.062	0.031	0.059	0.049	0.039
cg25588725	0.069	0.064	0.061	0.071	0.061	0.071	0.08	0.115	0.673	0.112	0.201	0.088	0.094	0.088	0.092	0.089
cg21035368	0.024	0.028	0.071	0.029	0.055	0.032	0.038	0.067	0.65	0.087	0.139	0.033	0.033	0.101	0.045	0.077
cg13601517	0.043	0.069	0.052	0.039	0.059	0.049	0.07	0.136	0.845	0.112	0.109	0.063	0.077	0.107	0.072	0.06
cg01987417	0.01	0.023	0.02	0.014	0.022	0.01	0.011	0.062	0.522	0.042	0.077	0.088	0.026	0.055	0.124	0.111
cg25678052	0.01	0.011	0.009	0.011	0.009	0.01	0.011	0.06	0.291	0.025	0.04	0.012	0.011	0.049	0.055	0.066
cg14280424	0.014	0.015	0.016	0.017	0.017	0.014	0.016	0.06	0.604	0.355	0.072	0.005	0.056	0.081	0.037	0.033
cg04855748	0.053	0.068	0.06	0.053	0.066	0.051	0.12	0.185	0.57	0.716	0.224	0.175	0.061	0.087	0.081	0.067
cg09675196	0.005	0.003	0.004	0.004	0.003	0.004	0.033	0.058	0.637	0.597	0.13	0.001	0.002	0.005	0.001	0.006
cg18383813	0.051	0.052	0.047	0.05	0.05	0.046	0.159	0.115	0.46	0.409	0.21	0.084	0.074	0.119	0.111	0.13
cg16520288	0.01	0.024	0.017	0.012	0.018	0.011	0.055	0.155	0.743	0.496	0.071	0.034	0.015	0.036	0.023	0.023
cg26721700	0.02	0.02	0.021	0.017	0.014	0.016	0.029	0.153	0.422	0.087	0.066	0.011	0.023	0.02	0.036	0.035
cg09386954	0.01	0.009	0.009	0.008	0.007	0.009	0.008	0.149	0.488	0.06	0.067	0.004	0	0.012	0.025	0.019
cg22618240	0.039	0.043	0.043	0.04	0.043	0.036	0.042	0.078	0.364	0.089	0.069	0.061	0.061	0.039	0.042	0.053
cg08659394	0.007	0.02	0.012	0.008	0.017	0.008	0.013	0.059	0.42	0.039	0.203	0.108	0.022	0.018	0.017	0.023
cg06212637	0.049	0.074	0.068	0.088	0.087	0.049	0.068	0.116	0.372	0.1	0.147	0.127	0.046	0.078	0.08	0.072
cg09146577	0.033	0.032	0.031	0.025	0.03	0.022	0.031	0.093	0.421	0.08	0.047	0.022	0.042	0.027	0.029	0.036
cg13622821	0.031	0.03	0.025	0.025	0.028	0.027	0.043	0.055	0.526	0.056	0.231	0.046	0.025	0.029	0.039	0.04
cg03693515	0.043	0.045	0.047	0.041	0.05	0.05	0.051	0.078	0.495	0.109	0.074	0.1	0.063	0.058	0.059	0.059
cg21295467	0.027	0.029	0.025	0.025	0.03	0.025	0.028	0.055	0.494	0.081	0.166	0.057	0.028	0.04	0.042	0.034
cg23735296	0.025	0.029	0.027	0.033	0.038	0.03	0.03	0.07	0.331	0.089	0.082	0.042	0.025	0.017	0.032	0.026
cg17206850	0.012	0.018	0.019	0.015	0.018	0.014	0.029	0.29	0.947	0.656	0.14	0.013	0.02	0.026	0.027	0.035
cg11716106	0.014	0.021	0.019	0.018	0.025	0.014	0.027	0.126	0.911	0.163	0.406	0.101	0.061	0.146	0.052	0.091
cg07323350	0.023	0.032	0.028	0.023	0.028	0.028	0.052	0.128	0.465	0.089	0.062	0.024	0.033	0.034	0.032	0.039
cg10164300	0.021	0.037	0.034	0.022	0.041	0.019	0.058	0.085	0.453	0.116	0.081	0.035	0.044	0.029	0.022	0.029
cg20554488	0.025	0.024	0.025	0.022	0.031	0.012	0.029	0.086	0.545	0.128	0.069	0.035	0.028	0.014	0.03	0.022
cg09109996	0.043	0.042	0.045	0.035	0.049	0.044	0.033	0.086	0.528	0.144	0.094	0.101	0.052	0.058	0.047	0.042
cg09994724	0.046	0.047	0.041	0.041	0.041	0.042	0.051	0.101	0.333	0.126	0.088	0.065	0.038	0.054	0.046	0.051
cg23735296	0.025	0.029	0.027	0.033	0.038	0.03	0.03	0.07	0.331	0.089	0.082	0.042	0.025	0.017	0.032	0.026
cg22409276	0.003	0.005	0.005	0.004	0.006	0.004	0.011	0.052	0.443	0.033	0.115	0.071	0.006	0.266	0.012	0.038
cg25266135	0.017	0.016	0.02	0.015	0.015	0.015	0.016	0.056	0.303	0.042	0.073	0.015	0.026	0.048	0.029	0.03
cg00944193	0.008	0.027	0.021	0.011	0.026	0.012	0.027	0.172	0.421	0.173	0.014	0.044	0.015	0.014	0.021	0.019
cg14215748	0.025	0.027	0.017	0.021	0.016	0.028	0.028	0.119	0.53	0.104	0.101	0.02	0.123	0.064	0.023	0.043
cg13495235	0.004	0.007	0.006	0.008	0.009	0.007	0.016	0.183	0.73	0.389	0.248	0.004	0.014	0.043	0.04	0.068
cg05330668	0.007	0.007	0.004	0.007	0.008	0.007	0.01	0.1	0.928	0.087	0.098	0.002	0	0.005	0.014	0.01
cg03577460	0.047	0.044	0.051	0.056	0.059	0.054	0.044	0.299	0.844	0.152	0.16	0.07	0.032	0.033	0.062	0.05
cg22152407	0.004	0.025	0.008	0.008	0.008	0.004	0.009	0.062	0.372	0.27	0.078	0.036	0.003	0.011	0.007	0.001
cg25397597	0.018	0.096	0.035	0.026	0.052	0.016	0.012	0.099	0.341	0.488	0.065	0.116	0.012	0.022	0.015	0.018
cg09083579	0.056	0.134	0.075	0.066	0.099	0.055	0.067	0.093	0.306	0.443	0.105	0.161	0.057	0.077	0.074	0.082
cg16754364	0.023	0.026	0.024	0.017	0.022	0.023	0.025	0.063	0.458	0.182	0.052	0.022	0.032	0.037	0.044	0.072
cg03650397	0.01	0.018	0.015	0.011	0.014	0.011	0.019	0.091	0.306	0.056	0.118	0.017	0.017	0.018	0.013	0.015
cg09018861	0.01	0.019	0.009	0.016	0.012	0.008	0.015	0.077	0.388	0.06	0.057	0.037	0.143	0.054	0.035	0.015
cg16860694	0.015	0.016	0.016	0.017	0.018	0.022	0.032	0.127	0.527	0.051	0.05	0.033	0.03	0.036	0.039	0.03
cg11260421	0.018	0.021	0.022	0.019	0.017	0.018	0.031	0.11	0.348	0.06	0.045	0.021	0.034	0.035	0.031	0.031
cg10227705	0.013	0.024	0.03	0.026	0.016	0.024	0.049	0.165	0.479	0.086	0.029	0.017	0.036	0.012	0.028	0.033
cg22198946	0.006	0.008	0.007	0.007	0.005	0.009	0.01	0.067	0.149	0.037	0.032	0.002	0.002	0.003	0.008	0.016
cg06747432	0.023	0.046	0.037	0.027	0.031	0.023	0.033	0.128	0.673	0.196	0.223	0.06	0.02	0.052	0.048	0.047
cg07323350	0.023	0.032	0.028	0.023	0.028	0.028	0.052	0.128	0.465	0.089	0.062	0.024	0.033	0.034	0.032	0.039
cg10164300	0.021	0.037	0.034	0.022	0.041	0.019	0.058	0.085	0.453	0.116	0.081	0.035	0.044	0.029	0.022	0.029
cg20554488	0.025	0.024	0.025	0.022	0.031	0.012	0.029	0.086	0.545	0.128	0.069	0.035	0.028	0.014	0.03	0.022
cg19258183	0.064	0.08	0.074	0.083	0.089	0.057	0.089	0.17	0.525	0.144	0.096	0.063	0.089	0.07	0.082	0.09
cg02871614	0.014	0.016	0.02	0.019	0.011	0.015	0.033	0.047	0.32	0.034	0.108	0.088	0.012	0.02	0.021	0.018
cg03208951	0.018	0.025	0.044	0.029	0.026	0.026	0.095	0.074	0.575	0.045	0.22	0.13	0.047	0.092	0.037	0.06
cg24321467	0.062	0.17	0.09	0.085	0.103	0.06	0.092	0.224	0.511	0.094	0.239	0.19	0.08	0.084	0.065	0.078
cg24000285	0.01	0.071	0.016	0.01	0.021	0.01	0.02	0.069	0.32	0.032	0.089	0.075	0.01	0.007	0.019	0.016
cg19281083	0.029	0.113	0.06	0.051	0.06	0.028	0.04	0.095	0.509	0.047	0.184	0.143	0.033	0.061	0.031	0.041
cg08490791	0.022	0.066	0.125	0.032	0.179	0.02	0.017	0.058	0.614	0.084	0.145	0.093	0.006	0.014	0.036	0.017
cg06035270	0.029	0.108	0.17	0.08	0.216	0.032	0.029	0.136	0.581	0.31	0.144	0.14	0.067	0.074	0.031	0.047
cg05032848	0.042	0.059	0.047	0.043	0.05	0.039	0.147	0.102	0.721	0.099	0.084	0.076	0.089	0.117	0.048	0.079
cg18710162	0.042	0.04	0.04	0.036	0.034	0.044	0.118	0.085	0.677	0.076	0.076	0.067	0.093	0.116	0.065	0.081
cg09292875	0.039	0.047	0.03	0.041	0.025	0.033	0.052	0.187	0.657	0.107	0.079	0.074	0.03	0.119	0.024	0.096
cg25939213	0.047	0.049	0.053	0.044	0.045	0.048	0.057	0.072	0.353	0.103	0.077	0.082	0.061	0.079	0.062	0.081
cg16079358	0.097	0.095	0.098	0.099	0.089	0.088	0.119	0.145	0.471	0.179	0.209	0.13	0.1	0.114	0.139	0.104
cg14607407	0.041	0.05	0.051	0.048	0.046	0.044	0.05	0.072	0.705	0.157	0.112	0.088	0.075	0.097	0.058	0.075
cg20301722	0.012	0.01	0.012	0.01	0.01	0.011	0.017	0.069	0.273	0.036	0.155	0.014	0.015	0.011	0.016	0.015
cg08936794	0.054	0.052	0.053	0.054	0.051	0.054	0.073	0.091	0.35	0.086	0.195	0.077	0.078	0.085	0.091	0.09
cg10652650	0.039	0.042	0.042	0.037	0.035	0.039	0.042	0.059	0.801	0.075	0.106	0.07	0.225	0.255	0.058	0.089
cg22125968	0.004	0.005	0.007	0.004	0.005	0.004	0.014	0.007	0.492	0.146	0.05	0.021	0.017	0.026	0.028	0.038
cg01536987	0.011	0.011	0.012	0.009	0.011	0.011	0.017	0.073	0.516	0.21	0.076	0.054	0.048	0.078	0.072	0.092
cg22752023	0.052	0.142	0.088	0.045	0.071	0.049	0.043	0.072	0.871	0.075	0.11	0.135	0.161	0.12	0.068	0.095
cg07931714	0.038	0.063	0.04	0.034	0.036	0.037	0.043	0.058	0.839	0.061	0.091	0.089	0.102	0.099	0.058	0.06
cg24208375	0.041	0.047	0.052	0.048	0.046	0.05	0.059	0.105	0.657	0.066	0.167	0.035	0.059	0.091	0.071	0.077
cg00586365	0.007	0.006	0.006	0.007	0.006	0.008	0.009	0.006	0.004	0.867	0.001	0.018	0.006	0.004	0.003	0.006
cg25475603	0.009	0.009	0.011	0.011	0.009	0.011	0.02	0.054	0.005	0.85	0.005	0.027	0.022	0.021	0.005	0.013
cg04504441	0.011	0.018	0.014	0.011	0.021	0.012	0.024	0.148	0.008	0.933	0.007	0.058	0.02	0.015	0.011	0.014
cg03384979	0.007	0.009	0.006	0.006	0.005	0.005	0.021	0.095	0.03	0.825	0.014	0.017	0.04	0.029	0.022	0.025
cg20367421	0.004	0.003	0.004	0.003	0.005	0.005	0.007	0.011	0.012	0.741	0.007	0.018	0.007	0.001	0.008	0.001
cg13530621	0.002	0.002	0.003	0.004	0.002	0.002	0.005	0.051	0.003	0.832	0.001	0.028	0.003	0.004	0.002	0.004
cg10589249	0.003	0.002	0.003	0.004	0.003	0.001	0.003	0.044	0.007	0.827	0.014	0.019	0.004	0.003	0.001	0.004
cg14576565	0.003	0.006	0.004	0.002	0.005	0.006	0.015	0.071	0.005	0.792	0	0.006	0.007	0.018	0.002	0.012
cg03384979	0.007	0.009	0.006	0.006	0.005	0.005	0.021	0.095	0.03	0.825	0.014	0.017	0.04	0.029	0.022	0.025
cg17049889	0.008	0.009	0.012	0.009	0.007	0.009	0.013	0.092	0.009	0.855	0.004	0.032	0.017	0.012	0.016	0.006
cg20367421	0.004	0.003	0.004	0.003	0.005	0.005	0.007	0.011	0.012	0.741	0.007	0.018	0.007	0.001	0.008	0.001
cg13530621	0.002	0.002	0.003	0.004	0.002	0.002	0.005	0.051	0.003	0.832	0.001	0.028	0.003	0.004	0.002	0.004
cg24487076	0.023	0.033	0.028	0.022	0.034	0.023	0.03	0.1	0.02	0.875	0.03	0.04	0.041	0.044	0.036	0.027
cg08704681	0.002	0.005	0.001	0.001	0.003	0.002	0	0.035	0.039	0.755	0.018	0	0	0	0.002	0
cg12060306	0.005	0.011	0.006	0.003	0.008	0.002	0.001	0.053	0.006	0.917	0	0.009	0.006	0.01	0.009	0.002
cg19614698	0.004	0.02	0.004	0.002	0.004	0.003	0.005	0.046	0.001	0.908	0.003	0.019	0.003	0.006	0.009	0
cg25765619	0.052	0.055	0.055	0.053	0.053	0.056	0.056	0.156	0.063	0.72	0.068	0.067	0.074	0.09	0.08	0.059
cg18251612	0.001	0.005	0.005	0.004	0.006	0.003	0.013	0.039	0.004	0.938	0.006	0.013	0.011	0.009	0.004	0.011
cg05771701	0.003	0.004	0.002	0.003	0.003	0.004	0.008	0.048	0.004	0.926	0.01	0.013	0.011	0.002	0.014	0.006
cg19337852	0.001	0.002	0.003	0.003	0.006	0.003	0.008	0.061	0.005	0.971	0	0.047	0.003	0	0.003	0.003
cg15375239	0.002	0.003	0.004	0.007	0.014	0.004	0.009	0.072	0.002	0.96	0	0.065	0.001	0.012	0	0.004
cg00275232	0.002	0.003	0.007	0.003	0.001	0.002	0.008	0.063	0.009	0.8	0.005	0.009	0.003	0.002	0.003	0.007
cg10884052	0.007	0.005	0.008	0.006	0.009	0.005	0.005	0.09	0.007	0.923	0.008	0.005	0	0	0	0
cg15686800	0.004	0.003	0.003	0.003	0.003	0.004	0.006	0.085	0.001	0.904	0	0.02	0	0.003	0.007	0.007
cg00113554	0.04	0.042	0.038	0.038	0.04	0.042	0.052	0.089	0.034	0.386	0.048	0.065	0.045	0.046	0.036	0.057
cg27420520	0.002	0.006	0.006	0.003	0.002	0.004	0.002	0.076	0.005	0.937	0.005	0.023	0.01	0.006	0.008	0.005
cg02246645	0.05	0.048	0.055	0.052	0.048	0.052	0.059	0.113	0.057	0.636	0.063	0.076	0.072	0.04	0.064	0.052
cg05064297	0.002	0.004	0.005	0.007	0.005	0.004	0.008	0.075	0.005	0.9	0	0.023	0.004	0.009	0.007	0.005
cg21353292	0.003	0.009	0.005	0.004	0.006	0.004	0.013	0.061	0.01	0.938	0.016	0.033	0	0.001	0	0.007
cg09334331	0.002	0.006	0.004	0.005	0.005	0.003	0.01	0.057	0.004	0.67	0.006	0.004	0.004	0.003	0.007	0.005
cg18782736	0.003	0.003	0.005	0.004	0.003	0.004	0.01	0.056	0.007	0.926	0	0.021	0	0.004	0.031	0.019
cg09483904	0.022	0.026	0.03	0.028	0.025	0.023	0.028	0.187	0.07	0.627	0.068	0.028	0.037	0.031	0.029	0.028
cg14460343	0.002	0.004	0.002	0.003	0.004	0.005	0.004	0.082	0.001	0.731	0.006	0.019	0.001	0.002	0	0.003
cg18064474	0.002	0.004	0.004	0.007	0.003	0.004	0.01	0.064	0.003	0.75	0.002	0.022	0.004	0.006	0.002	0.002
cg13080626	0.003	0.004	0.001	0.005	0.004	0.003	0.004	0.061	0.006	0.632	0.004	0.007	0.001	0.006	0	0.008
cg12217400	0.005	0.02	0.011	0.007	0.017	0.006	0.009	0.052	0.023	0.596	0.026	0.083	0.007	0.005	0.001	0.007
cg15490715	0.007	0.018	0.01	0.005	0.027	0.005	0.007	0.015	0.006	0.95	0	0.05	0.002	0.013	0.003	0.01
cg06613392	0.013	0.043	0.032	0.02	0.066	0.013	0.022	0.11	0.007	0.881	0.023	0.082	0.004	0.028	0.015	0.013
cg00370229	0.01	0.035	0.023	0.016	0.04	0.017	0.019	0.078	0.008	0.821	0	0.155	0.036	0.03	0.021	0.023
cg18607529	0.004	0.005	0.005	0.007	0.007	0.007	0.011	0.054	0.014	0.922	0.007	0.009	0.015	0.013	0.005	0.012
cg07589773	0.054	0.064	0.064	0.067	0.054	0.063	0.079	0.183	0.041	0.772	0.059	0.054	0.064	0.076	0.085	0.075
cg24713878	0.004	0.004	0.004	0.003	0.005	0.003	0.005	0.037	0.001	0.451	0	0.012	0.002	0	0.003	0.002
cg12316865	0.002	0.005	0.005	0.005	0.005	0.004	0.014	0.052	0.005	0.322	0.004	0.002	0.003	0.008	0.005	0.002
cg07337234	0.002	0.005	0.003	0.004	0.004	0.004	0.006	0.072	0.004	0.667	0.004	0.009	0.004	0.004	0.003	0
cg06873316	0.041	0.117	0.069	0.042	0.091	0.033	0.023	0.192	0.011	0.808	0.015	0.123	0.019	0.023	0.028	0.017
cg14749465	0.004	0.028	0.009	0.006	0.01	0.002	0	0.042	0.017	0.853	0.01	0.029	0	0.002	0.004	0.004
cg25532501	0.006	0.016	0.006	0.004	0.008	0.002	0.008	0.072	0.013	0.939	0.005	0.027	0.002	0.003	0.005	0.004
cg11781389	0.057	0.101	0.054	0.065	0.063	0.05	0.065	0.208	0.05	0.817	0.036	0.125	0.067	0.07	0.033	0.031
cg13070215	0.004	0.004	0.004	0.004	0.004	0.005	0.014	0.085	0.006	0.937	0.002	0.04	0.004	0.006	0	0.006
cg18153124	0.047	0.046	0.052	0.045	0.047	0.047	0.058	0.103	0.052	0.438	0.089	0.097	0.064	0.049	0.074	0.062
cg19134704	0.083	0.086	0.094	0.075	0.078	0.075	0.11	0.173	0.099	0.67	0.095	0.107	0.063	0.066	0.104	0.081
cg08871855	0.025	0.034	0.04	0.027	0.028	0.036	0.053	0.185	0.05	0.8	0.036	0.04	0.046	0.027	0.036	0.037
cg23511613	0.004	0.009	0.006	0.004	0.007	0.003	0.011	0.042	0.005	0.896	0	0.051	0.005	0.011	0.012	0.009
cg01297191	0.008	0.006	0.011	0.008	0.01	0.007	0.01	0.098	0.006	0.914	0.005	0	0.005	0.009	0.002	0.017
cg02096916	0.007	0.006	0.009	0.008	0.011	0.008	0.005	0.073	0.004	0.932	0.005	0.01	0.006	0.015	0.013	0.01
cg06974871	0.008	0.008	0.008	0.007	0.01	0.007	0.01	0.058	0.005	0.933	0.006	0.009	0	0.017	0.024	0.013
cg17374534	0.006	0.006	0.007	0.004	0.005	0.005	0.011	0.05	0.004	0.719	0	0.019	0.007	0.01	0.007	0.004
cg06369090	0.009	0.023	0.013	0.011	0.014	0.009	0.009	0.067	0.016	0.758	0.009	0.038	0.009	0.002	0.012	0.008
cg00620449	0.005	0.008	0.006	0.007	0.008	0.007	0.01	0.091	0.002	0.918	0.002	0.001	0.01	0.014	0.011	0.005
cg10589249	0.003	0.002	0.003	0.004	0.003	0.001	0.003	0.044	0.007	0.827	0.014	0.019	0.004	0.003	0.001	0.004
cg14576565	0.003	0.006	0.004	0.002	0.005	0.006	0.015	0.071	0.005	0.792	0	0.006	0.007	0.018	0.002	0.012
cg19337852	0.001	0.002	0.003	0.003	0.006	0.003	0.008	0.061	0.005	0.971	0	0.047	0.003	0	0.003	0.003
cg15375239	0.002	0.003	0.004	0.007	0.014	0.004	0.009	0.072	0.002	0.96	0	0.065	0.001	0.012	0	0.004
cg10091994	0.002	0.002	0.005	0.003	0.002	0.003	0.028	0.054	0.003	0.777	0.008	0.04	0.003	0.002	0.003	0.003
cg15993083	0.032	0.032	0.036	0.032	0.035	0.031	0.085	0.096	0.025	0.508	0.058	0.088	0.044	0.056	0.049	0.051
cg25425078	0.031	0.025	0.026	0.022	0.027	0.026	0.037	0.062	0.036	0.364	0.025	0.061	0.041	0.038	0.038	0.049
cg13575161	0.041	0.044	0.041	0.036	0.044	0.035	0.142	0.117	0.041	0.675	0.095	0.09	0.056	0.068	0.055	0.055
cg13758646	0.003	0.003	0.003	0.002	0.005	0.002	0.007	0.048	0.014	0.771	0.02	0.044	0.003	0	0.007	0.001
cg13652513	0.003	0.004	0.005	0.005	0.004	0.003	0.01	0.043	0.005	0.646	0.008	0.014	0.011	0.006	0.007	0.008
cg04140862	0.043	0.04	0.039	0.038	0.046	0.035	0.038	0.086	0.035	0.469	0.028	0.069	0.065	0.028	0.022	0.049
cg03394150	0.002	0.005	0.006	0.005	0.007	0.004	0.007	0.063	0.006	0.873	0.002	0.057	0.005	0.002	0.007	0.005
cg09528825	0.004	0.015	0.01	0.008	0.022	0.007	0.012	0.088	0.002	0.784	0.016	0.051	0.013	0.003	0.014	0.015
cg17809849	0.002	0.002	0.005	0.002	0.003	0.004	0.004	0.058	0.002	0.661	0.006	0.04	0.003	0.003	0.006	0.001
cg06722792	0.073	0.068	0.066	0.066	0.071	0.068	0.087	0.111	0.079	0.516	0.098	0.148	0.102	0.089	0.094	0.093
cg09628838	0.004	0.034	0.005	0.007	0.009	0.005	0.009	0.038	0.002	0.901	0.003	0.054	0.007	0.004	0.004	0.005
cg07148880	0.003	0.004	0.003	0.002	0.002	0.005	0.011	0.066	0.001	0.507	0.003	0	0.002	0	0	0.005
cg07010314	0.013	0.013	0.016	0.011	0.013	0.012	0.022	0.089	0.025	0.595	0.012	0.02	0.022	0.013	0.009	0.02
cg23750142	0.003	0.01	0.006	0.006	0.008	0.005	0.012	0.055	0.009	0.815	0.003	0.034	0.014	0.003	0.005	0.001
cg07844931	0.005	0.012	0.005	0.004	0.005	0.006	0.013	0.072	0.007	0.749	0	0.01	0.007	0.003	0.007	0.003
cg03271965	0.005	0.007	0.005	0.004	0.005	0.005	0.011	0.06	0.017	0.556	0.009	0.022	0.005	0.005	0.001	0.006
cg24449148	0.007	0.004	0.007	0.006	0.005	0.006	0.002	0.037	0.002	0.542	0.01	0.007	0.011	0	0.005	0.007
cg08265644	0.002	0.005	0.004	0.004	0.005	0.005	0.011	0.064	0.023	0.695	0.022	0.017	0.012	0	0.003	0.004
cg14174099	0.007	0.007	0.009	0.008	0.018	0.009	0.013	0.071	0.025	0.711	0.008	0.05	0.004	0.005	0.018	0.013
cg23609571	0.005	0.004	0.006	0.003	0.008	0.004	0.003	0.061	0.007	0.789	0	0.032	0.012	0.01	0.007	0.008
cg23702412	0.024	0.034	0.038	0.024	0.046	0.022	0.03	0.112	0.05	0.607	0.051	0.049	0.027	0.024	0.022	0.027
cg13836638	0.003	0.006	0.004	0.003	0.003	0.003	0.005	0.039	0.004	0.717	0.007	0.056	0.008	0.01	0.001	0.004
cg14678099	0.007	0.012	0.013	0.006	0.007	0.01	0.018	0.028	0.004	0.744	0.01	0.021	0.01	0.004	0.008	0.003
cg17093995	0.005	0.026	0.013	0.007	0.027	0.003	0.006	0.041	0.009	0.945	0	0.055	0.008	0.002	0.004	0
cg01297191	0.008	0.006	0.011	0.008	0.01	0.007	0.01	0.098	0.006	0.914	0.005	0	0.005	0.009	0.002	0.017
cg02096916	0.007	0.006	0.009	0.008	0.011	0.008	0.005	0.073	0.004	0.932	0.005	0.01	0.006	0.015	0.013	0.01
cg22789900	0.003	0.003	0.004	0.003	0.004	0.004	0.011	0.066	0.039	0.712	0.002	0.005	0.004	0.004	0.004	0.001
cg06036912	0.028	0.1	0.093	0.05	0.092	0.024	0.079	0.229	0.2	0.875	0.109	0.115	0.032	0.027	0.031	0.037
cg02199397	0.005	0.015	0.015	0.01	0.02	0.006	0.017	0.018	0.011	0.847	0.007	0.058	0.005	0	0.001	0
cg18815943	0.018	0.109	0.042	0.026	0.069	0.016	0.026	0.101	0.005	0.95	0.003	0.094	0	0.01	0.012	0.013
cg15457058	0.005	0.046	0.009	0.007	0.023	0.006	0.003	0.055	0.003	0.949	0.001	0.034	0.004	0.008	0.007	0.003
cg26417642	0.006	0.01	0.006	0.006	0.008	0.008	0.017	0.058	0.004	0.811	0.004	0.019	0.016	0.001	0.009	0.012
cg06533200	0.011	0.014	0.016	0.016	0.009	0.014	0.023	0.014	0.004	0.515	0.013	0.008	0.029	0.026	0.018	0.023
cg05760393	0.014	0.012	0.016	0.014	0.014	0.015	0.026	0.133	0.006	0.598	0.011	0.013	0.029	0.018	0.022	0.023
cg14564616	0.003	0.03	0.012	0.006	0.014	0.004	0.004	0.065	0.011	0.928	0.011	0.028	0.006	0.007	0.006	0.005
cg21547190	0.004	0.006	0.007	0.005	0.004	0.007	0.012	0.062	0.017	0.365	0.012	0.002	0.004	0.009	0	0.005
cg15709087	0.006	0.004	0.004	0.005	0.006	0.006	0.006	0.016	0.001	0.407	0.003	0.021	0.008	0	0.002	0.006
cg01725199	0.004	0.002	0.002	0.003	0.001	0.003	0.007	0.101	0.002	0.765	0	0.018	0.006	0.012	0.011	0.006
cg23511432	0.005	0.004	0.003	0.002	0.004	0.002	0.009	0.058	0.004	0.614	0.008	0.028	0.007	0.006	0.002	0.003
cg02288341	0.041	0.048	0.046	0.045	0.045	0.045	0.054	0.08	0.054	0.363	0.043	0.096	0.054	0.053	0.056	0.063
cg08592530	0.006	0.007	0.006	0.004	0.006	0.005	0.007	0.004	0.003	0.334	0.002	0.004	0.014	0	0.012	0
cg12592974	0.005	0.003	0.008	0.004	0.004	0.005	0.007	0.082	0.002	0.336	0.009	0.008	0.003	0	0.012	0.01
cg08578245	0.003	0.003	0.006	0.006	0.017	0.004	0.01	0.076	0.008	0.914	0.002	0.062	0.008	0.005	0.002	0.004
cg05446724	0.007	0.005	0.013	0.008	0.017	0.01	0.011	0.097	0.003	0.943	0.003	0.008	0.017	0.007	0.015	0.005
cg05195235	0.004	0.003	0.006	0.007	0.002	0.004	0.01	0.102	0.004	0.736	0.004	0	0.014	0.004	0.004	0.008
cg04743961	0.013	0.033	0.015	0.017	0.016	0.012	0.028	0.164	0.026	0.845	0.022	0.044	0.032	0.031	0.014	0.019
cg21721093	0.005	0.013	0.006	0.002	0.003	0.004	0.007	0.068	0.006	0.682	0.002	0.019	0.007	0.017	0	0.005
cg16801887	0.005	0.065	0.009	0.004	0.022	0.004	0.012	0.059	0.005	0.947	0.003	0.017	0.004	0.002	0.005	0.01
cg05106897	0.006	0.015	0.016	0.01	0.028	0.008	0.029	0.079	0.007	0.595	0.008	0.044	0.022	0.014	0.013	0.014
cg05994148	0.002	0.005	0.003	0.003	0.007	0.002	0.002	0.089	0.002	0.564	0	0.016	0.002	0	0.005	0
cg20405174	0.005	0.006	0.009	0.009	0.015	0.006	0.016	0.072	0.005	0.407	0.005	0.035	0.011	0.011	0.007	0.006
cg05233674	0.049	0.059	0.048	0.05	0.055	0.05	0.054	0.102	0.033	0.62	0.065	0.062	0.061	0.038	0.042	0.037
cg00444847	0.048	0.048	0.05	0.048	0.053	0.043	0.065	0.103	0.043	0.446	0.064	0.077	0.045	0.055	0.051	0.057
cg20078466	0.005	0.009	0.005	0.004	0.006	0.003	0.018	0.093	0.022	0.925	0.019	0.012	0.009	0.003	0.006	0.01
cg17971531	0.006	0.004	0.01	0.007	0.011	0.007	0.013	0.086	0.01	0.838	0.005	0.016	0.011	0.011	0.007	0.001
cg07763047	0.004	0.012	0.009	0.006	0.012	0.005	0.004	0.055	0.026	0.884	0.027	0.031	0.001	0.006	0.018	0.001
cg03630847	0.004	0.007	0.006	0.006	0.004	0.007	0.005	0.011	0.002	0.507	0.004	0.049	0.007	0.002	0.004	0.009
cg11737742	0.034	0.044	0.034	0.039	0.035	0.037	0.055	0.199	0.022	0.917	0.085	0.071	0.064	0.048	0.048	0.058
cg24599205	0.008	0.008	0.006	0.01	0.01	0.007	0.019	0.072	0.003	0.927	0.015	0.045	0.002	0.011	0.002	0.012
cg03867475	0.029	0.049	0.032	0.032	0.032	0.031	0.029	0.12	0.056	0.716	0.018	0.078	0.033	0.04	0.033	0.048
cg26770917	0.002	0.006	0.004	0.003	0.005	0.005	0.003	0.079	0.01	0.642	0	0.02	0	0.005	0.005	0.014
cg25905674	0.003	0.002	0.005	0.003	0.004	0.003	0.003	0.059	0.005	0.494	0.015	0.001	0.001	0.013	0.003	0.006
cg02344820	0.005	0.019	0.007	0.007	0.013	0.005	0.011	0.066	0.017	0.899	0.01	0.028	0.015	0.007	0.003	0.014
cg01263292	0.003	0.004	0.004	0.002	0.002	0.002	0.004	0.046	0.005	0.513	0.01	0.02	0.007	0	0.016	0.004
cg06815754	0.004	0.009	0.012	0.006	0.017	0.004	0.003	0.052	0.002	0.636	0	0.038	0.005	0	0.009	0.001
cg16657816	0.005	0.007	0.008	0.007	0.009	0.008	0.016	0.072	0.007	0.575	0.018	0.114	0	0.017	0.009	0.011
cg14290127	0.133	0.194	0.244	0.141	0.271	0.135	0.134	0.148	0.083	0.518	0.1	0.181	0.171	0.253	0.161	0.169
cg24583855	0.006	0.007	0.005	0.005	0.004	0.003	0.008	0.131	0.009	0.802	0	0.008	0.001	0.002	0.003	0.013
cg23203338	0.038	0.042	0.043	0.041	0.037	0.038	0.062	0.092	0.038	0.627	0.03	0.053	0.063	0.05	0.044	0.049
cg12266953	0.021	0.018	0.019	0.012	0.027	0.017	0.018	0.062	0.008	0.564	0.007	0.03	0.019	0.01	0.01	0.009
cg19113641	0.003	0.004	0.007	0.007	0.015	0.003	0.002	0.053	0.003	0.571	0.001	0.021	0.015	0	0.003	0.01
cg21039778	0.004	0.005	0.007	0.005	0.016	0.003	0.008	0.061	0.008	0.6	0.002	0.031	0.008	0.002	0.003	0.007
cg18884940	0.006	0.007	0.005	0.005	0.006	0.007	0.006	0.038	0.008	0.523	0.004	0	0.012	0.015	0.006	0.008
cg16405637	0.003	0.006	0.009	0.007	0.006	0.003	0.008	0.045	0.035	0.721	0.025	0.021	0.001	0	0.007	0.008
cg24084504	0.066	0.076	0.08	0.068	0.078	0.066	0.063	0.182	0.021	0.869	0.075	0.102	0.073	0.076	0.096	0.081
cg22935149	0.002	0.011	0.006	0.004	0.008	0.005	0.012	0.011	0.008	0.592	0.007	0.04	0.01	0.008	0.016	0.003
cg08265644	0.002	0.005	0.004	0.004	0.005	0.005	0.011	0.064	0.023	0.695	0.022	0.017	0.012	0	0.003	0.004
cg14174099	0.007	0.007	0.009	0.008	0.018	0.009	0.013	0.071	0.025	0.711	0.008	0.05	0.004	0.005	0.018	0.013
cg23609571	0.005	0.004	0.006	0.003	0.008	0.004	0.003	0.061	0.007	0.789	0	0.032	0.012	0.01	0.007	0.008
cg14358879	0.008	0.011	0.008	0.006	0.004	0.007	0.016	0.087	0.014	0.175	0.005	0.021	0.009	0.007	0.003	0.005
cg15490075	0.004	0.008	0.003	0.004	0.004	0.005	0.019	0.093	0.007	0.935	0.018	0.011	0.009	0.022	0.016	0.02
cg23625715	0.004	0.005	0.007	0.002	0.006	0.003	0.034	0.073	0.009	0.714	0	0.006	0.015	0.008	0.002	0.013
cg01150641	0.056	0.067	0.056	0.06	0.058	0.052	0.157	0.134	0.075	0.715	0.121	0.069	0.052	0.024	0.047	0.074
cg18762736	0.013	0.012	0.009	0.008	0.014	0.009	0.009	0.047	0.003	0.714	0.005	0.005	0.014	0.016	0.014	0.009
cg02909711	0.006	0.013	0.01	0.007	0.01	0.006	0.014	0.058	0.003	0.698	0.006	0.02	0.009	0	0.014	0.007
cg21574404	0.002	0.007	0.008	0.003	0.007	0.004	0.011	0.064	0.005	0.657	0.001	0.033	0.009	0.006	0.007	0.007
cg02144298	0.002	0.01	0.007	0.004	0.013	0.004	0.022	0.07	0.003	0.777	0.005	0.033	0.018	0.027	0.012	0.014
cg08303146	0.005	0.01	0.003	0.007	0.011	0.004	0.004	0.088	0.014	0.898	0.003	0.052	0.013	0.007	0.008	0.009
cg16174680	0.004	0.013	0.007	0.005	0.024	0.005	0.003	0.046	0.006	0.712	0.003	0.053	0.001	0.003	0.007	0.008
cg06653699	0.02	0.072	0.032	0.02	0.051	0.025	0.038	0.115	0.011	0.678	0.006	0.055	0.024	0.033	0.036	0.018
cg08439930	0.011	0.035	0.017	0.013	0.017	0.011	0.03	0.148	0.218	0.891	0.035	0.033	0.021	0.011	0.013	0.018
cg08806408	0.016	0.094	0.028	0.019	0.035	0.017	0.022	0.126	0.004	0.853	0.007	0.067	0.019	0.015	0.017	0.021
cg00124695	0.006	0.022	0.007	0.004	0.011	0.007	0.01	0.072	0.021	0.793	0.016	0.025	0.008	0.002	0	0.002
cg21241839	0.017	0.027	0.025	0.019	0.021	0.023	0.031	0.077	0.009	0.742	0.032	0.017	0.057	0.054	0.05	0.054
cg09697651	0.002	0.004	0.002	0.002	0.003	0.003	0	0.046	0.028	0.63	0.016	0.037	0.003	0.014	0.003	0.006
cg19760323	0.013	0.012	0.014	0.012	0.012	0.014	0.013	0.092	0.007	0.56	0.002	0.022	0.019	0.011	0.019	0.021
cg13648312	0.002	0.005	0.004	0.004	0.005	0.005	0.005	0.044	0.007	0.665	0.007	0.065	0.014	0.002	0.022	0.009
cg00586365	0.007	0.006	0.006	0.007	0.006	0.008	0.009	0.006	0.004	0.867	0.001	0.018	0.006	0.004	0.003	0.006
cg25475603	0.009	0.009	0.011	0.011	0.009	0.011	0.02	0.054	0.005	0.85	0.005	0.027	0.022	0.021	0.005	0.013
cg04504441	0.011	0.018	0.014	0.011	0.021	0.012	0.024	0.148	0.008	0.933	0.007	0.058	0.02	0.015	0.011	0.014
cg10324219	0.005	0.014	0.012	0.006	0.007	0.008	0.025	0.086	0.027	0.881	0.004	0.026	0.007	0.003	0	0.008
cg07416383	0.006	0.03	0.009	0.008	0.015	0.007	0.011	0.077	0.007	0.827	0.006	0.032	0.005	0.004	0.007	0
cg21185289	0.005	0.033	0.01	0.004	0.024	0.007	0.011	0.071	0.003	0.959	0.002	0.046	0.014	0.011	0.012	0.007
cg07248310	0.006	0.032	0.005	0.006	0.009	0.003	0.005	0.084	0.013	0.786	0.009	0.027	0.003	0.007	0.002	0.001
cg22790257	0.004	0.006	0.006	0.006	0.007	0.004	0.005	0.059	0.006	0.568	0.003	0.008	0.012	0.015	0.002	0.011
cg06100368	0.042	0.045	0.047	0.037	0.044	0.04	0.048	0.067	0.044	0.52	0.033	0.066	0.042	0.044	0.06	0.049
cg12845520	0.003	0.018	0.007	0.01	0.02	0.004	0.014	0.064	0.004	0.708	0.003	0.023	0.006	0.013	0	0.004
cg00264591	0.01	0.018	0.014	0.012	0.012	0.008	0.013	0.088	0.009	0.921	0	0.033	0.012	0.015	0.006	0.003
cg01450705	0.007	0.019	0.011	0.016	0.019	0.007	0.009	0.08	0.006	0.869	0.005	0.023	0.008	0.006	0.012	0.009
cg13877285	0.004	0.005	0.004	0.004	0.003	0.005	0.012	0.068	0.029	0.548	0.02	0.042	0.016	0.021	0.001	0.001
cg06876710	0.001	0.003	0.004	0.004	0.004	0.004	0.01	0.063	0.003	0.553	0.004	0.032	0.003	0.004	0.01	0.005
cg10695848	0.006	0.005	0.009	0.005	0.006	0.007	0.008	0.093	0.02	0.054	0.487	0.002	0.027	0.013	0	0.008
cg02408775	0.003	0.006	0.005	0.003	0.004	0.006	0.004	0.054	0.091	0.043	0.512	0.045	0.01	0.011	0.009	0.003
cg07469555	0.011	0.019	0.021	0.01	0.015	0.014	0.017	0.085	0.029	0.031	0.56	0.047	0.017	0.017	0.008	0.009
cg20785674	0.024	0.024	0.024	0.023	0.027	0.024	0.074	0.074	0.048	0.08	0.711	0.024	0.075	0.031	0.034	0.037
cg05611779	0.005	0.003	0.005	0.005	0.003	0.004	0.006	0.071	0.015	0.039	0.216	0.011	0.012	0.005	0.005	0.001
cg25654652	0.006	0.011	0.009	0.008	0.008	0.007	0.01	0.092	0.097	0.042	0.472	0.074	0.02	0.015	0.003	0.017
cg17491987	0.02	0.018	0.026	0.016	0.018	0.018	0.021	0.092	0.026	0.05	0.434	0.037	0.01	0.015	0.015	0.014
cg19311889	0.008	0.006	0.006	0.02	0.011	0.011	0.013	0.092	0.045	0.054	0.36	0.035	0.007	0.014	0.008	0.011
cg07675334	0.07	0.071	0.071	0.067	0.057	0.072	0.073	0.189	0.047	0.11	0.406	0.09	0.09	0.102	0.102	0.106
cg04588455	0.011	0.014	0.013	0.008	0.013	0.014	0.019	0.111	0.017	0.052	0.554	0.033	0.057	0.112	0.03	0.026
cg23298160	0.004	0.003	0.007	0	0.003	0.006	0.009	0.064	0.018	0.045	0.175	0.002	0	0.004	0.002	0.004
cg11199810	0.016	0.019	0.02	0.011	0.02	0.021	0.036	0.1	0.023	0.055	0.472	0.015	0.022	0.048	0.023	0.035
cg15676015	0.008	0.009	0.007	0.007	0.008	0.008	0.041	0.132	0.018	0.041	0.374	0.027	0.011	0.025	0.023	0.029
cg23588713	0.016	0.021	0.019	0.015	0.02	0.024	0.04	0.079	0.024	0.091	0.691	0.043	0.081	0.174	0.036	0.045
cg17083506	0.009	0.009	0.008	0.014	0.007	0.01	0.015	0.063	0.009	0.042	0.292	0.005	0.024	0.083	0.018	0.024
cg18462521	0.013	0.013	0.024	0.024	0.024	0.013	0.035	0.055	0.104	0.053	0.508	0.012	0.054	0.044	0.07	0.062
cg14862207	0.018	0.02	0.019	0.017	0.021	0.016	0.049	0.244	0.316	0.542	0.93	0.029	0.012	0.249	0.065	0.163
cg03026373	0.003	0.005	0.004	0.008	0.006	0.005	0.023	0.128	0.255	0.282	0.897	0.017	0.02	0.182	0.024	0.106
cg06550177	0.01	0.028	0.029	0.111	0.04	0.015	0.334	0.132	0.009	0.114	0.776	0.024	0.02	0.033	0.016	0.023
cg14794936	0.017	0.04	0.084	0.04	0.068	0.017	0.04	0.171	0.078	0.24	0.813	0.054	0.033	0.08	0.008	0.016
cg19672993	0.022	0.028	0.037	0.023	0.039	0.022	0.04	0.102	0.148	0.138	0.603	0.043	0.024	0.032	0.031	0.024
cg03897866	0.02	0.023	0.023	0.023	0.026	0.021	0.064	0.194	0.031	0.086	0.556	0.034	0.045	0.031	0.048	0.035
cg03451296	0.004	0.006	0.004	0.004	0.007	0.004	0.007	0.046	0.01	0.037	0.149	0.029	0.007	0.015	0.004	0.009
cg23411981	0.015	0.032	0.011	0.024	0.02	0.024	0.052	0.162	0.065	0.12	0.521	0.032	0.013	0.068	0.035	0.017
cg03451296	0.004	0.006	0.004	0.004	0.007	0.004	0.007	0.046	0.01	0.037	0.149	0.029	0.007	0.015	0.004	0.009
cg23411981	0.015	0.032	0.011	0.024	0.02	0.024	0.052	0.162	0.065	0.12	0.521	0.032	0.013	0.068	0.035	0.017
cg08384314	0.011	0.017	0.011	0.014	0.015	0.014	0.018	0.271	0.167	0.04	0.823	0.038	0.005	0.12	0.173	0.204
cg17389738	0.088	0.084	0.079	0.077	0.078	0.079	0.096	0.206	0.286	0.096	0.51	0.148	0.102	0.334	0.345	0.329
cg07850967	0.028	0.025	0.028	0.025	0.026	0.029	0.032	0.13	0.034	0.063	0.431	0.053	0.029	0.039	0.026	0.022
cg25954914	0.025	0.029	0.027	0.024	0.023	0.027	0.04	0.081	0.141	0.261	0.601	0.04	0.029	0.029	0.029	0.025
cg08128768	0.008	0.008	0.035	0.007	0.02	0.006	0.399	0.082	0.038	0.036	0.568	0.038	0.017	0.057	0.018	0.017
cg24794433	0.06	0.059	0.095	0.064	0.078	0.053	0.491	0.124	0.06	0.101	0.492	0.134	0.082	0.127	0.061	0.089
cg10188897	0.019	0.023	0.023	0.021	0.022	0.03	0.031	0.073	0.094	0.242	0.603	0.07	0.054	0.084	0.027	0.035
cg25365990	0.043	0.055	0.086	0.059	0.069	0.043	0.082	0.085	0.078	0.109	0.724	0.045	0.085	0.106	0.052	0.06
cg18395466	0.028	0.088	0.058	0.045	0.073	0.031	0.04	0.141	0.016	0.076	0.548	0.08	0.045	0.031	0.027	0.034
cg12204258	0.02	0.066	0.023	0.019	0.031	0.029	0.162	0.479	0.097	0.132	0.843	0.04	0.012	0.042	0.042	0.071
cg16209664	0.135	0.259	0.163	0.117	0.203	0.109	0.35	0.388	0.271	0.181	0.639	0.294	0.093	0.213	0.27	0.333
cg16489193	0.04	0.065	0.112	0.053	0.073	0.047	0.087	0.122	0.163	0.072	0.718	0.064	0.037	0.044	0.048	0.057
cg00865724	0.003	0.007	0.003	0.005	0.006	0.004	0.031	0.137	0.009	0.048	0.299	0.022	0.004	0.097	0.008	0.074
cg01383799	0.044	0.037	0.039	0.036	0.037	0.035	0.032	0.079	0.04	0.084	0.454	0.047	0.041	0.042	0.053	0.047
cg16725050	0.136	0.142	0.152	0.136	0.139	0.143	0.181	0.357	0.078	0.565	0.35	0.166	0.19	0.204	0.226	0.219
cg11348442	0.004	0.005	0.007	0.005	0.005	0.007	0.042	0.122	0.035	0.333	0.418	0.002	0.017	0.026	0.036	0.032
cg04797170	0.048	0.044	0.038	0.04	0.046	0.051	0.058	0.082	0.051	0.122	0.335	0.08	0.115	0.08	0.054	0.057
cg08572315	0.041	0.039	0.037	0.043	0.039	0.043	0.039	0.086	0.059	0.109	0.504	0.064	0.074	0.084	0.031	0.035
cg01184784	0.02	0.019	0.04	0.021	0.018	0.024	0.089	0.092	0.108	0.573	0.67	0.016	0.044	0.024	0	0.022
cg10466124	0.018	0.019	0.03	0.02	0.017	0.021	0.047	0.07	0.145	0.074	0.327	0.013	0.029	0.019	0.003	0.02
cg03303359	0.081	0.089	0.087	0.081	0.083	0.081	0.086	0.11	0.072	0.117	0.434	0.084	0.094	0.096	0.102	0.093
cg01657744	0.055	0.065	0.063	0.061	0.064	0.049	0.054	0.072	0.051	0.085	0.665	0.074	0.11	0.159	0.075	0.079
cg25590492	0.043	0.079	0.06	0.04	0.079	0.038	0.114	0.323	0.123	0.044	0.71	0.102	0.019	0.025	0.071	0.062
cg03178838	0.065	0.081	0.074	0.076	0.071	0.089	0.094	0.146	0.519	0.118	0.699	0.091	0.226	0.177	0.217	0.264
cg23885932	0.014	0.012	0.015	0.012	0.014	0.012	0.007	0.065	0.412	0.045	0.695	0.015	0.098	0.097	0.19	0.198
cg09495643	0.076	0.081	0.079	0.072	0.072	0.072	0.085	0.126	0.511	0.113	0.685	0.082	0.213	0.201	0.249	0.261
cg04879506	0.01	0.01	0.01	0.009	0.008	0.01	0.016	0.057	0.035	0.034	0.141	0.015	0.009	0.016	0.009	0.005
cg17102069	0.008	0.067	0.008	0.01	0.011	0.012	0.027	0.042	0.011	0.037	0.191	0.046	0.011	0.02	0.016	0.015
cg11671913	0.035	0.035	0.034	0.031	0.035	0.035	0.051	0.092	0.192	0.138	0.527	0.067	0.039	0.066	0.045	0.052
cg06822952	0.01	0.011	0.01	0.009	0.008	0.01	0.015	0.056	0.098	0.031	0.197	0.021	0.017	0.029	0.015	0.015
cg00067414	0.037	0.04	0.042	0.044	0.043	0.033	0.059	0.065	0.059	0.079	0.408	0.068	0.042	0.043	0.046	0.05
cg10698928	0.011	0.128	0.053	0.013	0.09	0.008	0.01	0.086	0.006	0.584	0.647	0.1	0.007	0.034	0.008	0.055
cg16331823	0.017	0.017	0.018	0.017	0.014	0.021	0.037	0.247	0.061	0.072	0.141	0.016	0.03	0.048	0.037	0.052
cg16493531	0.01	0.013	0.012	0.016	0.012	0.013	0.016	0.253	0.058	0.051	0.487	0.038	0.037	0.128	0.122	0.12
cg10916998	0.029	0.026	0.034	0.028	0.025	0.034	0.042	0.231	0.057	0.08	0.324	0.023	0.036	0.095	0.062	0.098
cg13804182	0.031	0.035	0.032	0.035	0.027	0.026	0.048	0.115	0.085	0.073	0.276	0.059	0.043	0.186	0.143	0.151
cg14567593	0.043	0.051	0.044	0.045	0.04	0.051	0.044	0.161	0.244	0.084	0.568	0.057	0.037	0.081	0.033	0.066
cg12565250	0.013	0.036	0.025	0.021	0.011	0.009	0.021	0.178	0.036	0.092	0.337	0.035	0.068	0.056	0.026	0.018
cg14862207	0.018	0.02	0.019	0.017	0.021	0.016	0.049	0.244	0.316	0.542	0.93	0.029	0.012	0.249	0.065	0.163
cg03026373	0.003	0.005	0.004	0.008	0.006	0.005	0.023	0.128	0.255	0.282	0.897	0.017	0.02	0.182	0.024	0.106
cg24823751	0.013	0.034	0.049	0.035	0.053	0.012	0.053	0.293	0.047	0.112	0.419	0.028	0.008	0.011	0.027	0.028
cg00282704	0.026	0.054	0.074	0.063	0.115	0.04	0.194	0.262	0.096	0.179	0.567	0.081	0.032	0.061	0.072	0.073
cg25599475	0.013	0.015	0.017	0.017	0.014	0.018	0.03	0.074	0.18	0.04	0.411	0.047	0.09	0.134	0.052	0.054
cg25247183	0.015	0.018	0.016	0.017	0.018	0.016	0.022	0.075	0.204	0.044	0.564	0.023	0.035	0.288	0.124	0.175
cg11779273	0.006	0.048	0.018	0.007	0.058	0.003	0.012	0.081	0.013	0.049	0.185	0.033	0	0	0.024	0.007
cg13084458	0.044	0.162	0.145	0.061	0.202	0.039	0.045	0.084	0.033	0.088	0.202	0.141	0.039	0.04	0.049	0.043
cg25442239	0.018	0.063	0.042	0.025	0.06	0.019	0.027	0.045	0.015	0.06	0.139	0.054	0.019	0.007	0.024	0.021
cg11828180	0.03	0.063	0.049	0.036	0.057	0.026	0.046	0.184	0.328	0.479	0.885	0.052	0.027	0.042	0.133	0.169
cg03048654	0.056	0.116	0.091	0.058	0.111	0.058	0.062	0.229	0.161	0.786	0.673	0.138	0.009	0.107	0.081	0.169
cg06611922	0.016	0.047	0.04	0.021	0.051	0.016	0.05	0.125	0.153	0.525	0.661	0.042	0.009	0.046	0.025	0.138
cg11836236	0.053	0.063	0.064	0.055	0.074	0.056	0.074	0.145	0.142	0.126	0.383	0.077	0.055	0.111	0.058	0.154
cg03178838	0.065	0.081	0.074	0.076	0.071	0.089	0.094	0.146	0.519	0.118	0.699	0.091	0.226	0.177	0.217	0.264
cg02297063	0.007	0.01	0.009	0.009	0.008	0.009	0.014	0.053	0.522	0.028	0.817	0.004	0.336	0.15	0.215	0.24
cg16238993	0.044	0.049	0.051	0.043	0.048	0.046	0.053	0.095	0.485	0.058	0.766	0.052	0.252	0.178	0.234	0.275
cg19864130	0.031	0.037	0.037	0.036	0.036	0.034	0.035	0.068	0.475	0.07	0.787	0.019	0.386	0.249	0.264	0.284
cg04194674	0.006	0.008	0.007	0.009	0.008	0.008	0.103	0.276	0.416	0.322	0.893	0.006	0.011	0.345	0.044	0.197
cg14399863	0.034	0.048	0.071	0.045	0.076	0.031	0.045	0.074	0.06	0.072	0.516	0.09	0.091	0.092	0.078	0.126
cg03245733	0.042	0.047	0.052	0.051	0.043	0.043	0.045	0.066	0.039	0.102	0.41	0.055	0.071	0.062	0.068	0.041
cg04394254	0.036	0.044	0.047	0.04	0.052	0.038	0.049	0.165	0.294	0.064	0.547	0.083	0.04	0.048	0.05	0.056
cg18097224	0.011	0.011	0.006	0.007	0.005	0.008	0.043	0.16	0.068	0.127	0.26	0.027	0.016	0.014	0.021	0.022
cg11485451	0.013	0.018	0.015	0.01	0.012	0.011	0.053	0.183	0.102	0.102	0.319	0.035	0.01	0.03	0.029	0.027
cg17487170	0.264	0.276	0.239	0.233	0.233	0.259	0.314	0.436	0.325	0.309	0.628	0.34	0.267	0.311	0.31	0.318
cg13046271	0.075	0.078	0.065	0.061	0.066	0.067	0.129	0.161	0.15	0.147	0.26	0.101	0.09	0.106	0.099	0.1
cg09588360	0.053	0.058	0.056	0.049	0.054	0.047	0.099	0.101	0.208	0.073	0.583	0.084	0.063	0.091	0.076	0.078
cg09318066	0.035	0.041	0.035	0.046	0.037	0.044	0.044	0.101	0.331	0.091	0.538	0.022	0.064	0.104	0.039	0.067
cg19618955	0.036	0.041	0.037	0.04	0.046	0.025	0.108	0.286	0.228	0.116	0.603	0.038	0.038	0.053	0.044	0.096
cg23804620	0.011	0.118	0.019	0.011	0.016	0.018	0.293	0.087	0.135	0.041	0.84	0.063	0.461	0.328	0.036	0.086
cg04055819	0.04	0.054	0.067	0.034	0.063	0.037	0.064	0.107	0.055	0.495	0.637	0.08	0.052	0.061	0.039	0.063
cg20517614	0.03	0.044	0.043	0.029	0.051	0.029	0.045	0.074	0.074	0.434	0.451	0.078	0.033	0.056	0.041	0.057
cg21546996	0.005	0.011	0.013	0.007	0.009	0.012	0.011	0.013	0.017	0.085	0.121	0.012	0.019	0.018	0.015	0.006
cg20577019	0.027	0.028	0.034	0.029	0.029	0.032	0.038	0.068	0.031	0.062	0.273	0.05	0.035	0.029	0.034	0.04
cg09918657	0.023	0.037	0.122	0.035	0.132	0.033	0.093	0.085	0.104	0.374	0.634	0.063	0.011	0.057	0.059	0.096
cg13149116	0.036	0.043	0.045	0.032	0.066	0.032	0.044	0.098	0.144	0.171	0.411	0.056	0.031	0.001	0.038	0.023
cg03355998	0.02	0.035	0.022	0.018	0.024	0.018	0.109	0.152	0.57	0.278	0.851	0.034	0.037	0.064	0.071	0.34
cg18097224	0.011	0.011	0.006	0.007	0.005	0.008	0.043	0.16	0.068	0.127	0.26	0.027	0.016	0.014	0.021	0.022
cg11485451	0.013	0.018	0.015	0.01	0.012	0.011	0.053	0.183	0.102	0.102	0.319	0.035	0.01	0.03	0.029	0.027
cg17487170	0.264	0.276	0.239	0.233	0.233	0.259	0.314	0.436	0.325	0.309	0.628	0.34	0.267	0.311	0.31	0.318
cg13046271	0.075	0.078	0.065	0.061	0.066	0.067	0.129	0.161	0.15	0.147	0.26	0.101	0.09	0.106	0.099	0.1
cg06251289	0.019	0.02	0.012	0.014	0.011	0.021	0.062	0.148	0.154	0.337	0.496	0.062	0.017	0.105	0.026	0.04
cg17346857	0.06	0.068	0.063	0.059	0.055	0.063	0.091	0.094	0.166	0.277	0.319	0.224	0.095	0.147	0.103	0.099
cg00120948	0.079	0.078	0.07	0.171	0.072	0.127	0.052	0.107	0.055	0.069	0.582	0.099	0.057	0.086	0.061	0.058
cg11088422	0.03	0.062	0.033	0.032	0.031	0.035	0.023	0.103	0.257	0.639	0.723	0.086	0.045	0.084	0.043	0.044
cg01122302	0.038	0.075	0.05	0.044	0.045	0.038	0.064	0.097	0.187	0.563	0.75	0.081	0.049	0.224	0.107	0.112
cg19489797	0.02	0.041	0.024	0.021	0.041	0.021	0.029	0.103	0.31	0.317	0.518	0.06	0.027	0.035	0.031	0.03
cg12892506	0.034	0.178	0.118	0.039	0.181	0.029	0.156	0.351	0.118	0.256	0.878	0.118	0.003	0.059	0.07	0.171
cg06045337	0.013	0.017	0.015	0.013	0.012	0.02	0.039	0.07	0.456	0.04	0.725	0.015	0.096	0.269	0.225	0.272
cg05267543	0.048	0.06	0.055	0.057	0.066	0.052	0.099	0.091	0.367	0.203	0.662	0.058	0.04	0.125	0.043	0.077
cg09134794	0.073	0.086	0.08	0.069	0.087	0.065	0.062	0.156	0.048	0.205	0.596	0.073	0.063	0.059	0.098	0.075
cg04313875	0.006	0.011	0.007	0.237	0.018	0.006	0.01	0.077	0.485	0.032	0.861	0.023	0.047	0.285	0.306	0.327
cg17105609	0.008	0.01	0.014	0.009	0.009	0.009	0.051	0.025	0.334	0.038	0.525	0.079	0.027	0.447	0.014	0.071
cg05866411	0.026	0.04	0.038	0.035	0.027	0.036	0.062	0.131	0.461	0.09	0.554	0.154	0.071	0.395	0.032	0.041
cg20564913	0.015	0.017	0.03	0.015	0.018	0.017	0.055	0.121	0.475	0.045	0.559	0.149	0.052	0.526	0.028	0.065
cg08774969	0.008	0.008	0.015	0.009	0.01	0.006	0.056	0.063	0.341	0.038	0.486	0.045	0.034	0.421	0.027	0.04
cg14262681	0.009	0.057	0.025	0.009	0.044	0.006	0.009	0.064	0.046	0.958	0.782	0.081	0.002	0	0.16	0.238
cg01047432	0.015	0.014	0.013	0.012	0.016	0.016	0.01	0.081	0.015	0.041	0.156	0.025	0.032	0.016	0.021	0.013
cg08183724	0.045	0.089	0.081	0.045	0.098	0.036	0.058	0.198	0.035	0.53	0.797	0.064	0.05	0.021	0.14	0.263
cg14999291	0.033	0.03	0.039	0.037	0.037	0.033	0.094	0.123	0.034	0.092	0.357	0.053	0.047	0.049	0.038	0.05
cg08206536	0.043	0.036	0.043	0.039	0.043	0.04	0.069	0.111	0.036	0.099	0.289	0.057	0.058	0.086	0.058	0.042
cg14440947	0.014	0.019	0.02	0.019	0.017	0.019	0.014	0.069	0.15	0.048	0.23	0.023	0.017	0.034	0.026	0.024
cg11597497	0.041	0.04	0.049	0.047	0.037	0.038	0.07	0.16	0.329	0.123	0.75	0.046	0.044	0.298	0.107	0.243
cg04547244	0.008	0.008	0.009	0.009	0.01	0.009	0.024	0.089	0.045	0.049	0.158	0.03	0.012	0.017	0.018	0.014
cg00123762	0.047	0.07	0.064	0.047	0.11	0.045	0.041	0.254	0.555	0.558	0.868	0.072	0.018	0.023	0.016	0.019
cg19120717	0.233	0.196	0.27	0.216	0.308	0.218	0.133	0.34	0.508	0.781	0.701	0.239	0.047	0.081	0.071	0.062
cg22544673	0.069	0.071	0.087	0.072	0.102	0.059	0.091	0.116	0.142	0.279	0.651	0.095	0.067	0.08	0.063	0.065
cg14308313	0.021	0.127	0.053	0.038	0.084	0.024	0.01	0.084	0.276	0.045	0.497	0.094	0.077	0.056	0.058	0.071
cg01654446	0.054	0.076	0.034	0.029	0.034	0.047	0.046	0.07	0.097	0.501	0.235	0.072	0.03	0.042	0.043	0.035
cg06230948	0.011	0.015	0.004	0.005	0.005	0.01	0.037	0.032	0.132	0.318	0.29	0.028	0	0.007	0.025	0.021
cg20942867	0.026	0.026	0.303	0.114	0.249	0.052	0.256	0.143	0.168	0.041	0.79	0.088	0.142	0.072	0.046	0.055
cg18222083	0.009	0.011	0.009	0.008	0.007	0.012	0.012	0.083	0.967	0.057	0.613	0.016	0.019	0.063	0.017	0.095
cg06848185	0.011	0.02	0.019	0.02	0.025	0.015	0.022	0.122	0.079	0.193	0.407	0.076	0.033	0.189	0.035	0.066
cg00087417	0.026	0.032	0.027	0.03	0.025	0.025	0.076	0.095	0.039	0.081	0.386	0.06	0.056	0.107	0.123	0.077
cg22357337	0.008	0.026	0.013	0.006	0.015	0.003	0.014	0.126	0.038	0.066	0.151	0.013	0.004	0.004	0.002	0.007
cg01240734	0.005	0.007	0.009	0.003	0.007	0.007	0.013	0.109	0.111	0.051	0.158	0.001	0.005	0	0.027	0.005
cg15063753	0.003	0.003	0.003	0.005	0.001	0.004	0.007	0.045	0.01	0.023	0.004	0.204	0.004	0.006	0.002	0.003
cg20099054	0.005	0.007	0.008	0.006	0.006	0.007	0.008	0.051	0.006	0.025	0.006	0.206	0.005	0.002	0.006	0.001
cg23687994	0.003	0.004	0.005	0.005	0.004	0.007	0.011	0.047	0.011	0.033	0.008	0.222	0.008	0.005	0.009	0.004
cg15057238	0.003	0.003	0.004	0.003	0.005	0.004	0.007	0.066	0.003	0.031	0.002	0.197	0	0.008	0.009	0.001
cg00313795	0.035	0.038	0.043	0.037	0.025	0.033	0.047	0.125	0.026	0.113	0.027	0.209	0.122	0.112	0.092	0.109
cg14507193	0.004	0.013	0.004	0.005	0.009	0.006	0.007	0.048	0.004	0.046	0	0.19	0.009	0.004	0.001	0.003
cg11171224	0.006	0.007	0.009	0.007	0.01	0.008	0.026	0.05	0.005	0.033	0	0.201	0.005	0.012	0.001	0.003
cg00590991	0.007	0.007	0.008	0.011	0.01	0.008	0.013	0.057	0.003	0.033	0.009	0.194	0.009	0.003	0.01	0.008
cg00616500	0.009	0.008	0.011	0.01	0.008	0.009	0.012	0.053	0.008	0.039	0.007	0.239	0.008	0.019	0.013	0.007
cg16149129	0.006	0.003	0.004	0.003	0.002	0.003	0.008	0.075	0.002	0.038	0.002	0.174	0.006	0.006	0.002	0.01
cg00590991	0.007	0.007	0.008	0.011	0.01	0.008	0.013	0.057	0.003	0.033	0.009	0.194	0.009	0.003	0.01	0.008
cg00616500	0.009	0.008	0.011	0.01	0.008	0.009	0.012	0.053	0.008	0.039	0.007	0.239	0.008	0.019	0.013	0.007
cg12358000	0.007	0.026	0.005	0.008	0.005	0.004	0.01	0.06	0.004	0.035	0.001	0.2	0.008	0.011	0.009	0.011
cg23416667	0.005	0.03	0.008	0.008	0.015	0.006	0.008	0.031	0.003	0.043	0.004	0.201	0.018	0.006	0.013	0.009
cg17105358	0.004	0.005	0.004	0.004	0.004	0.004	0.007	0.081	0.036	0.036	0.034	0.233	0.006	0.012	0.009	0.007
cg17493098	0.006	0.007	0.008	0.007	0.003	0.006	0.008	0.052	0.028	0.037	0.014	0.193	0.01	0.014	0.001	0.013
cg14792031	0.013	0.019	0.02	0.021	0.018	0.016	0.047	0.174	0.012	0.118	0.012	0.019	0.012	0.029	0.008	0.016
cg22109320	0.027	0.026	0.026	0.027	0.024	0.025	0.026	0.053	0.022	0.06	0.018	0.405	0.033	0.039	0.035	0.024
cg21690091	0.042	0.043	0.045	0.042	0.046	0.041	0.056	0.065	0.047	0.072	0.054	0.654	0.064	0.05	0.055	0.045
cg14913969	0.007	0.081	0.015	0.006	0.01	0.005	0.007	0.064	0.009	0.034	0.006	0.214	0.001	0.002	0	0.002
cg03970039	0.003	0.007	0.008	0.004	0.01	0.004	0.007	0.042	0.01	0.038	0.005	0.137	0.003	0.011	0.006	0.004
cg17055145	0.003	0.006	0.005	0.004	0.003	0.003	0.01	0.058	0.013	0.035	0.006	0.145	0.011	0.005	0.006	0.007
cg20675019	0.009	0.01	0.011	0.011	0.01	0.011	0.012	0.066	0.005	0.027	0.002	0.185	0.013	0.012	0.01	0.015
cg03797501	0.028	0.036	0.025	0.022	0.03	0.02	0.022	0.088	0.059	0.053	0.069	0.133	0.028	0.02	0.024	0.014
cg01919118	0.033	0.044	0.039	0.033	0.039	0.035	0.043	0.147	0.022	0.069	0.027	0.171	0.062	0.042	0.052	0.042
cg19889264	0.069	0.08	0.076	0.069	0.065	0.078	0.082	0.208	0.016	0.09	0.035	0.169	0.101	0.103	0.109	0.094
cg27051335	0.011	0.015	0.011	0.01	0.014	0.009	0.011	0.075	0.001	0.039	0	0.195	0.018	0.003	0.01	0.014
cg22947959	0.006	0.008	0.009	0.006	0.006	0.006	0.01	0.059	0.005	0.035	0.015	0.154	0.006	0.01	0.011	0.004
cg00660163	0.01	0.015	0.009	0.006	0.014	0.008	0.005	0.04	0.007	0.042	0.008	0.182	0.003	0.03	0.027	0.006
cg26297866	0.004	0.011	0.01	0.01	0.008	0.009	0.028	0.188	0.051	0.073	0	0.031	0.002	0.015	0.019	0.021
cg22411407	0.005	0.003	0.005	0.003	0.003	0.004	0.005	0.043	0.004	0.068	0.004	0.14	0.008	0.004	0.015	0.008
cg10549156	0.004	0.003	0.006	0.005	0.005	0.005	0.007	0.043	0.002	0.22	0.01	0.14	0.005	0.008	0.016	0.009
cg09866690	0.013	0.015	0.015	0.019	0.018	0.018	0.03	0.076	0.005	0.219	0.013	0.126	0.038	0.027	0.042	0.036
cg10545536	0.006	0.006	0.006	0.007	0.004	0.007	0.01	0.081	0.005	0.037	0.006	0.157	0.011	0.011	0.004	0.003
cg05460370	0.005	0.004	0.008	0.006	0.005	0.004	0.009	0.099	0.012	0.043	0.009	0.139	0.007	0.008	0.006	0.006
cg15760257	0.009	0.007	0.008	0.009	0.01	0.007	0.017	0.019	0.005	0.041	0.005	0.146	0.015	0.014	0.018	0.008
cg20669266	0.004	0.007	0.008	0.006	0.008	0.005	0.011	0.077	0.006	0.045	0.004	0.15	0.002	0.004	0.005	0.004
cg19091756	0.026	0.032	0.032	0.025	0.03	0.026	0.033	0.119	0.016	0.057	0.034	0.131	0.042	0.054	0.055	0.047
cg26320410	0.007	0.009	0.007	0.007	0.008	0.008	0.014	0.056	0.004	0.044	0	0.171	0.012	0.018	0.024	0.008
cg21415305	0.075	0.075	0.081	0.072	0.072	0.086	0.087	0.35	0.031	0.109	0.096	0.292	0.091	0.132	0.114	0.118
cg18083704	0.01	0.012	0.017	0.008	0.015	0.011	0.011	0.151	0.007	0.094	0.008	0.187	0.013	0.019	0.024	0.016
cg01423563	0.044	0.038	0.046	0.041	0.038	0.042	0.061	0.104	0.064	0.082	0.081	0.174	0.058	0.062	0.081	0.054
cg10165847	0.012	0.152	0.02	0.014	0.04	0.008	0.023	0.01	0.004	0.042	0.005	0.247	0.007	0.002	0	0.009
cg04009887	0.03	0.07	0.019	0.044	0.022	0.033	0.013	0.065	0.005	0.113	0.103	0.402	0.011	0.023	0.008	0.008
cg16468187	0.007	0.054	0.013	0.008	0.009	0.006	0.011	0.07	0.003	0.037	0.009	0.193	0.004	0.007	0.019	0.013
cg06412434	0.019	0.022	0.022	0.012	0.018	0.02	0.016	0.096	0.012	0.041	0.03	0.143	0.022	0.025	0.023	0.021
cg05756848	0.008	0.007	0.005	0.003	0.009	0.009	0.023	0.085	0.011	0.051	0.018	0.119	0.001	0.01	0.01	0.01
cg27414233	0.009	0.011	0.009	0.005	0.007	0.008	0.004	0.063	0.009	0.036	0.013	0.148	0.014	0.009	0.009	0.006
cg25353308	0.006	0.047	0.013	0.012	0.025	0.006	0.009	0.073	0.006	0.033	0.004	0.176	0	0.007	0.01	0.009
cg20536983	0.059	0.26	0.063	0.065	0.106	0.066	0.068	0.158	0.039	0.069	0.05	0.317	0.064	0.057	0.046	0.045
cg03304380	0.025	0.2	0.016	0.017	0.043	0.007	0.028	0.062	0.013	0.038	0.011	0.327	0.004	0.02	0	0.01
cg04611479	0.008	0.017	0.008	0.009	0.006	0.007	0.008	0.065	0.009	0.035	0.006	0.14	0.001	0.015	0.006	0.013
cg15954782	0.005	0.01	0.007	0.008	0.004	0.01	0.013	0.061	0.004	0.036	0.002	0.141	0.022	0.004	0.015	0.013
cg09795194	0.011	0.021	0.014	0.01	0.009	0.012	0.016	0.107	0.009	0.041	0.005	0.201	0.015	0.018	0.015	0.013
cg16462237	0.025	0.042	0.033	0.03	0.025	0.025	0.034	0.015	0.009	0.052	0.001	0.207	0.044	0.025	0.024	0.029
cg11725975	0.012	0.016	0.016	0.01	0.007	0.009	0.006	0.169	0.006	0.056	0.008	0.224	0.016	0.007	0.01	0.005
cg25667490	0.021	0.036	0.034	0.025	0.034	0.029	0.033	0.145	0.013	0.153	0.011	0.059	0.058	0.068	0.056	0.059
cg27269921	0.006	0.069	0.007	0.007	0.006	0.004	0.013	0.051	0.008	0.053	0.006	0.172	0.013	0.01	0.006	0.011
cg10129201	0.008	0.089	0.013	0.01	0.019	0.004	0.015	0.051	0.004	0.032	0.001	0.186	0.012	0.017	0.013	0.011
cg20018561	0.045	0.048	0.053	0.042	0.044	0.048	0.043	0.185	0.02	0.053	0.014	0.216	0.049	0.045	0.076	0.055
cg18796523	0.007	0.011	0.013	0.006	0.006	0.008	0.009	0.124	0.006	0.026	0.009	0.167	0.013	0.005	0.019	0.005
cg16560774	0.016	0.069	0.014	0.012	0.013	0.013	0.019	0.043	0.003	0.044	0.007	0.195	0.012	0.018	0.021	0.012
cg07441156	0.012	0.021	0.019	0.016	0.014	0.016	0.025	0.083	0.009	0.042	0.015	0.229	0.031	0.021	0.033	0.014
cg21003581	0.013	0.115	0.019	0.022	0.07	0.01	0.014	0.083	0.014	0.059	0.012	0.195	0.02	0.024	0.014	0.022
cg17137182	0.008	0.062	0.012	0.009	0.032	0.007	0.008	0.057	0.004	0.037	0.007	0.154	0	0.005	0.002	0.002
cg20045888	0.011	0.023	0.018	0.009	0.019	0.014	0.009	0.081	0.007	0.035	0.026	0.184	0.011	0.012	0.021	0.01
cg11342332	0.011	0.029	0.031	0.016	0.06	0.011	0.018	0.084	0.011	0.058	0.017	0.238	0.017	0.018	0.011	0.005
cg06615861	0.015	0.022	0.026	0.013	0.03	0.017	0.016	0.079	0.005	0.042	0.008	0.189	0.019	0.021	0.019	0.018
cg10545536	0.006	0.006	0.006	0.007	0.004	0.007	0.01	0.081	0.005	0.037	0.006	0.157	0.011	0.011	0.004	0.003
cg05460370	0.005	0.004	0.008	0.006	0.005	0.004	0.009	0.099	0.012	0.043	0.009	0.139	0.007	0.008	0.006	0.006
cg14743593	0.004	0.003	0.003	0.002	0.002	0.002	0.004	0.06	0.002	0.303	0.008	0.247	0.01	0.002	0.007	0.003
cg16238795	0.003	0.004	0.004	0.003	0.005	0.004	0.005	0.048	0.008	0.259	0.007	0.138	0.01	0.006	0.007	0.001
cg21205463	0.016	0.024	0.018	0.016	0.014	0.015	0.014	0.062	0.007	0.053	0.011	0.193	0.012	0.03	0.016	0.019
cg08073591	0.009	0.076	0.012	0.004	0.013	0.005	0.013	0.048	0.005	0.042	0.009	0.153	0.005	0.004	0.011	0.007
cg10861495	0.032	0.036	0.035	0.032	0.028	0.04	0.046	0.125	0.015	0.126	0.024	0.195	0.06	0.055	0.047	0.053
cg26261192	0.006	0.008	0.009	0.006	0.006	0.011	0.012	0.101	0.008	0.077	0	0.088	0.019	0.01	0.005	0.006
cg11404486	0.01	0.012	0.012	0.012	0.011	0.011	0.014	0.084	0.006	0.117	0.008	0.212	0.015	0.018	0.019	0.015
cg22638268	0.039	0.045	0.046	0.037	0.042	0.043	0.057	0.079	0.045	0.07	0.065	0.484	0.066	0.069	0.067	0.066
cg21952901	0.011	0.019	0.019	0.015	0.024	0.012	0.018	0.075	0.003	0.035	0.002	0.167	0.015	0.013	0.016	0.013
cg09156233	0.011	0.111	0.022	0.013	0.045	0.008	0.02	0.043	0.003	0.036	0.003	0.196	0.006	0.007	0.006	0.01
cg08369258	0.005	0.008	0.01	0.005	0.008	0.008	0.006	0.076	0.016	0.049	0	0.126	0.011	0.008	0.002	0.007
cg21921384	0.012	0.05	0.018	0.013	0.022	0.011	0.023	0.065	0.015	0.049	0.014	0.171	0.03	0.092	0.019	0.021
cg01959562	0.006	0.048	0.011	0.006	0.013	0.004	0.004	0.071	0.003	0.04	0.009	0.177	0.01	0.072	0	0.013
cg18954700	0.015	0.11	0.02	0.016	0.022	0.009	0.016	0.069	0.017	0.05	0.013	0.242	0.022	0.016	0.019	0.011
cg08451598	0.01	0.008	0.015	0.007	0.007	0.009	0.015	0.069	0.004	0.04	0.006	0.132	0.02	0.015	0.003	0.004
cg07779120	0.012	0.144	0.021	0.008	0.02	0.011	0.012	0.083	0.005	0.035	0.015	0.226	0.005	0.003	0.015	0.014
cg01956420	0.022	0.19	0.026	0.011	0.075	0.004	0.009	0.069	0.004	0.042	0.005	0.281	0.013	0.011	0.014	0.004
cg20327444	0.015	0.077	0.021	0.025	0.033	0.007	0.008	0.111	0.008	0.041	0.008	0.077	0.005	0.017	0.001	0.008
cg17541528	0.011	0.118	0.025	0.015	0.041	0.007	0.015	0.03	0.014	0.042	0.003	0.154	0.012	0.001	0.015	0.005
cg01351037	0.007	0.007	0.009	0.008	0.005	0.008	0.013	0.099	0.01	0.037	0.024	0.151	0.009	0.015	0.008	0.01
cg02839273	0.085	0.078	0.081	0.072	0.069	0.073	0.092	0.147	0.099	0.107	0.118	0.198	0.079	0.115	0.086	0.103
cg09800012	0.01	0.008	0.005	0.007	0.005	0.007	0.006	0.078	0.006	0.041	0	0.119	0.026	0.005	0.011	0.001
cg10497884	0.016	0.056	0.019	0.015	0.02	0.013	0.021	0.008	0.036	0.053	0.029	0.201	0.018	0.02	0.026	0.017
cg20637307	0.007	0.051	0.019	0.005	0.026	0.002	0.005	0.05	0.012	0.086	0.002	0.161	0.001	0.01	0.015	0.003
cg16329650	0.024	0.032	0.031	0.016	0.029	0.024	0.049	0.168	0.069	0.224	0.036	0	0.024	0.162	0.138	0.119
cg19031658	0.006	0.061	0.013	0.008	0.032	0.005	0.007	0.063	0.009	0.037	0.013	0.165	0.012	0.011	0.018	0.007
cg27589088	0.015	0.074	0.016	0.009	0.015	0.008	0.01	0.057	0.003	0.037	0.003	0.158	0.009	0.015	0.006	0.013
cg11342332	0.011	0.029	0.031	0.016	0.06	0.011	0.018	0.084	0.011	0.058	0.017	0.238	0.017	0.018	0.011	0.005
cg06615861	0.015	0.022	0.026	0.013	0.03	0.017	0.016	0.079	0.005	0.042	0.008	0.189	0.019	0.021	0.019	0.018
cg00229245	0.007	0.015	0.012	0.012	0.012	0.012	0.018	0.071	0.008	0.038	0.014	0.155	0.02	0.017	0.015	0.017
cg02334314	0.008	0.081	0.013	0.012	0.017	0.008	0.012	0.072	0.017	0.066	0.013	0.202	0.013	0.022	0.011	0.011
cg02440668	0.011	0.114	0.017	0.013	0.018	0.006	0.018	0.069	0.005	0.213	0.004	0.285	0.012	0.006	0.011	0.012
cg14275457	0.006	0.009	0.009	0.012	0.01	0.01	0.01	0.11	0.004	0.044	0	0.142	0.013	0.005	0.013	0.012
cg24634420	0.011	0.156	0.019	0.015	0.061	0.004	0.008	0.065	0.007	0.034	0.003	0.216	0.009	0.004	0.006	0.005
cg20937139	0.051	0.179	0.075	0.054	0.125	0.044	0.051	0.105	0.046	0.067	0.068	0.255	0.066	0.05	0.048	0.065
cg18592273	0.012	0.03	0.015	0.01	0.013	0.013	0.017	0.071	0.006	0.103	0.017	0.169	0.013	0.006	0.017	0.012
cg22479710	0.015	0.038	0.02	0.018	0.022	0.015	0.011	0.054	0.042	0.05	0.033	0.201	0.017	0.016	0.021	0.015
cg21805221	0.009	0.023	0.02	0.011	0.033	0.01	0.013	0.087	0.005	0.05	0.011	0.137	0.013	0.014	0.017	0.013
cg06943981	0.005	0.01	0.008	0.011	0.016	0.008	0.019	0.064	0.005	0.041	0	0.128	0.015	0.013	0.017	0.013
cg19186435	0.007	0.009	0.015	0.007	0.008	0.011	0.018	0.091	0.004	0.031	0	0.132	0.008	0.014	0.016	0.016
cg20872579	0.036	0.046	0.043	0.029	0.042	0.031	0.021	0.071	0.016	0.05	0.012	0.262	0.035	0.025	0.027	0.023
cg00818473	0.019	0.039	0.041	0.021	0.057	0.011	0.016	0.063	0.011	0.036	0.007	0.189	0.007	0.027	0.002	0.01
cg21273098	0.01	0.009	0.012	0.011	0.013	0.009	0.016	0.055	0.004	0.068	0.005	0.12	0.003	0.005	0.008	0.006
cg20208858	0.017	0.027	0.026	0.021	0.029	0.013	0.032	0.069	0.024	0.119	0.039	0.233	0.01	0.007	0.003	0.019
cg16017578	0.011	0.033	0.016	0.012	0.02	0.012	0.02	0.086	0.013	0.056	0.009	0.195	0.017	0.028	0.024	0.021
cg23001131	0.008	0.095	0.011	0.005	0.016	0.003	0.01	0.054	0.008	0.034	0.002	0.132	0.003	0.009	0	0.001
cg12147137	0.005	0.033	0.008	0.006	0.013	0.006	0.012	0.08	0.003	0.051	0.002	0.132	0.014	0.008	0.009	0.009
cg10251826	0.011	0.027	0.022	0.012	0.022	0.013	0.013	0.089	0.02	0.096	0.011	0.209	0.02	0.021	0.016	0.02
cg00639195	0.05	0.068	0.062	0.057	0.052	0.056	0.046	0.137	0.018	0.119	0.002	0.167	0.081	0.061	0.046	0.057
cg09671109	0.012	0.021	0.013	0.011	0.012	0.012	0.021	0.025	0.004	0.087	0.006	0.142	0.008	0.011	0.019	0.019
cg09795194	0.011	0.021	0.014	0.01	0.009	0.012	0.016	0.107	0.009	0.041	0.005	0.201	0.015	0.018	0.015	0.013
cg16462237	0.025	0.042	0.033	0.03	0.025	0.025	0.034	0.015	0.009	0.052	0.001	0.207	0.044	0.025	0.024	0.029
cg10039188	0.014	0.079	0.025	0.011	0.037	0.011	0.015	0.101	0.012	0.057	0.013	0.228	0.031	0.014	0.019	0.017
cg15427448	0.023	0.09	0.03	0.02	0.025	0.02	0.016	0.143	0.008	0.049	0.013	0.267	0.024	0.026	0.03	0.021
cg10079740	0.011	0.13	0.018	0.009	0.043	0.005	0.011	0.081	0.006	0.046	0.007	0.194	0.004	0.007	0.009	0.002
cg22950163	0.094	0.179	0.13	0.095	0.145	0.086	0.088	0.146	0.084	0.122	0.097	0.214	0.12	0.103	0.118	0.106
cg07217075	0.008	0.029	0.012	0.009	0.009	0.007	0.009	0.117	0.006	0.047	0.002	0.155	0.007	0.019	0.019	0.011
cg14557714	0.015	0.131	0.016	0.015	0.029	0.009	0.015	0.083	0.004	0.026	0.011	0.213	0.01	0.021	0.02	0.023
cg20721121	0.022	0.024	0.02	0.015	0.017	0.02	0.012	0.112	0.007	0.066	0.009	0.187	0.021	0.005	0.012	0.015
cg10779644	0.01	0.012	0.011	0.008	0.009	0.009	0.017	0.071	0.017	0.04	0.018	0.136	0.01	0.014	0.014	0.015
cg15927720	0.013	0.104	0.033	0.011	0.059	0.007	0.007	0.062	0.004	0.023	0.007	0.183	0.014	0.008	0.006	0.01
cg02403292	0.019	0.015	0.012	0.007	0.027	0.017	0.045	0.215	0.039	0.038	0.004	0.017	0.009	0.005	0.002	0.002
cg00773459	0.006	0.011	0.012	0.008	0.013	0.007	0.016	0.065	0.009	0.044	0.015	0.127	0.007	0.012	0.012	0.018
cg19596204	0.011	0.01	0.013	0.008	0.01	0.009	0.024	0.094	0.016	0.058	0.01	0.17	0.014	0.026	0.019	0.025
cg13096135	0.014	0.129	0.028	0.016	0.067	0.008	0.014	0.081	0.006	0.044	0.008	0.223	0.008	0.009	0.012	0.012
cg16921014	0.065	0.076	0.067	0.062	0.083	0.06	0.057	0.15	0.01	0.076	0.025	0.234	0.061	0.078	0.085	0.084
cg25185518	0.029	0.037	0.025	0.026	0.051	0.019	0.015	0.066	0.005	0.037	0.013	0.22	0.017	0.022	0.07	0.019
cg26286805	0.009	0.018	0.013	0.008	0.01	0.011	0.015	0.072	0.003	0.065	0.006	0.129	0.006	0.012	0.007	0.009
cg24410546	0.013	0.088	0.023	0.02	0.02	0.02	0.025	0.078	0.017	0.046	0.007	0.164	0.073	0.055	0.051	0.05
cg00444261	0.011	0.083	0.017	0.013	0.018	0.013	0.02	0.1	0.008	0.035	0.019	0.189	0.025	0.009	0.004	0.012
cg19867649	0.013	0.148	0.013	0.014	0.016	0.008	0.018	0.058	0.008	0.049	0.007	0.199	0.017	0.01	0.017	0.016
cg02422426	0.034	0.161	0.036	0.03	0.035	0.019	0.014	0.13	0.012	0.055	0.011	0.292	0.023	0.013	0.015	0.019
cg21735491	0.005	0.003	0.006	0.004	0.01	0.003	0.011	0.075	0.031	0.05	0	0.024	0.723	0.115	0.013	0.008
cg23671719	0.015	0.02	0.018	0.018	0.019	0.015	0.029	0.079	0.007	0.05	0.015	0.015	0.361	0.028	0.03	0.026
cg23100979	0.005	0.007	0.009	0.009	0.005	0.004	0.012	0.071	0.011	0.046	0.023	0.004	0.33	0	0.009	0.023
cg14226678	0.035	0.034	0.044	0.034	0.035	0.035	0.039	0.087	0.009	0.04	0.011	0.022	0.358	0.053	0.051	0.057
cg07137955	0.009	0.009	0.011	0.014	0.009	0.007	0.022	0.103	0.013	0.038	0.018	0.037	0.952	0.012	0.016	0.425
cg04223424	0.012	0.017	0.014	0.015	0.008	0.01	0.025	0.09	0.015	0.061	0.014	0.005	0.935	0.022	0.028	0.438
cg22940848	0.007	0.009	0.011	0.003	0.009	0.004	0.007	0.103	0.014	0.064	0.014	0.033	0.765	0.308	0.044	0.017
cg25153601	0.005	0.009	0.009	0.007	0.008	0.007	0.016	0.054	0.008	0.041	0.009	0.014	0.466	0.012	0.012	0.21
cg23670932	0.017	0.02	0.017	0.016	0.017	0.017	0.037	0.098	0.025	0.129	0.059	0.023	0.45	0.046	0.022	0.224
cg25503881	0.03	0.035	0.044	0.033	0.046	0.034	0.042	0.067	0.038	0.09	0.059	0.062	0.452	0.068	0.043	0.206
cg06483076	0.051	0.063	0.072	0.047	0.072	0.058	0.079	0.144	0.095	0.191	0.066	0.042	0.543	0.083	0.072	0.274
cg21708354	0.004	0.005	0.003	0.002	0.004	0.003	0.001	0.044	0.008	0.034	0.004	0.006	0.222	0.003	0	0.09
cg25951501	0.009	0.009	0.01	0.015	0.011	0.013	0.054	0.119	0.004	0.089	0.009	0.016	0.919	0.052	0.036	0.451
cg08870433	0.021	0.006	0.009	0.005	0.013	0.006	0.011	0.018	0.054	0.032	0.023	0.024	0.411	0.009	0	0.184
cg17012863	0.009	0.007	0.008	0.006	0.009	0.011	0.012	0.05	0.002	0.042	0.01	0.011	0.516	0.045	0.043	0.282
cg11772224	0.046	0.044	0.045	0.037	0.043	0.039	0.044	0.083	0.042	0.091	0.046	0.063	0.575	0.12	0.108	0.34
cg23671719	0.015	0.02	0.018	0.018	0.019	0.015	0.029	0.079	0.007	0.05	0.015	0.015	0.361	0.028	0.03	0.026
cg23100979	0.005	0.007	0.009	0.009	0.005	0.004	0.012	0.071	0.011	0.046	0.023	0.004	0.33	0	0.009	0.023
cg14226678	0.035	0.034	0.044	0.034	0.035	0.035	0.039	0.087	0.009	0.04	0.011	0.022	0.358	0.053	0.051	0.057
cg04789589	0.023	0.025	0.025	0.025	0.026	0.02	0.054	0.073	0.03	0.087	0.02	0.038	0.684	0.259	0.014	0.016
cg04358131	0.011	0.027	0.006	0.005	0.016	0.005	0.012	0.053	0.139	0.045	0.034	0.028	0.687	0.342	0.01	0.026
cg12280168	0.012	0.015	0.013	0.009	0.018	0.01	0.007	0.071	0.011	0.042	0	0.017	0.344	0.01	0.008	0.16
cg09384137	0.042	0.049	0.045	0.044	0.046	0.044	0.044	0.082	0.042	0.093	0.037	0.038	0.346	0.066	0.062	0.173
cg01971612	0.006	0.006	0.006	0.008	0.006	0.008	0.011	0.081	0.008	0.044	0.012	0.006	0.336	0.007	0.002	0.189
cg18485485	0.014	0.015	0.016	0.014	0.014	0.013	0.02	0.074	0.011	0.051	0.004	0.005	0.363	0.019	0.015	0.209
cg21698802	0.05	0.053	0.053	0.048	0.051	0.049	0.053	0.07	0.061	0.072	0.072	0.069	0.326	0.074	0.073	0.213
cg09398185	0.031	0.025	0.035	0.026	0.032	0.026	0.037	0.077	0.038	0.077	0.038	0.047	0.737	0.323	0.031	0.046
cg19542119	0.003	0.005	0.006	0.006	0.014	0.003	0.018	0.092	0.004	0.259	0	0.021	0.621	0.017	0.007	0.298
cg13488570	0.01	0.012	0.01	0.011	0.014	0.011	0.022	0.074	0.008	0.032	0.033	0.066	0.601	0.316	0.087	0.039
cg21594646	0.041	0.052	0.058	0.042	0.046	0.053	0.056	0.12	0.017	0.062	0.041	0.042	0.486	0.051	0.096	0.28
cg13909555	0.024	0.024	0.029	0.025	0.025	0.026	0.023	0.083	0.005	0.037	0	0.001	0.562	0.051	0.048	0.307
cg16395953	0.029	0.023	0.026	0.025	0.03	0.017	0.036	0.114	0.027	0.098	0.025	0.058	0.627	0.193	0.051	0.04
cg14380270	0.01	0.012	0.016	0.011	0.014	0.011	0.008	0.065	0.032	0.483	0.076	0.034	0.888	0.034	0.025	0.455
cg18608369	0.015	0.014	0.014	0.013	0.011	0.015	0.012	0.051	0.012	0.411	0.012	0.028	0.845	0.013	0.031	0.419
cg01348733	0.032	0.03	0.035	0.029	0.034	0.033	0.03	0.08	0.026	0.495	0.066	0.099	0.827	0.055	0.078	0.432
cg05224998	0.023	0.024	0.027	0.027	0.029	0.025	0.022	0.105	0.044	0.213	0.05	0.066	0.79	0.032	0.033	0.39
cg18323912	0.035	0.033	0.039	0.032	0.034	0.031	0.03	0.092	0.055	0.078	0.075	0.038	0.864	0.048	0.045	0.436
cg14085527	0.02	0.022	0.051	0.019	0.015	0.01	0.01	0.122	0.041	0.061	0.014	0.037	0.59	0.018	0.013	0.301
cg03870746	0.052	0.055	0.077	0.061	0.061	0.045	0.068	0.131	0.052	0.092	0.052	0.069	0.573	0.115	0.069	0.333
cg19091784	0.009	0.011	0.012	0.029	0.014	0.012	0.015	0.046	0.054	0.031	0.007	0.004	0.577	0.329	0.067	0.106
cg26029997	0.011	0.013	0.014	0.033	0.013	0.015	0.051	0.122	0.069	0.058	0.003	0.019	0.554	0.335	0.071	0.082
cg09692335	0.04	0.04	0.04	0.041	0.039	0.039	0.051	0.055	0.047	0.078	0.055	0.063	0.268	0.114	0.068	0.069
cg09460983	0.03	0.036	0.036	0.033	0.032	0.038	0.031	0.092	0.076	0.09	0.096	0.046	0.618	0.085	0.057	0.042
cg04160501	0.009	0.013	0.023	0.009	0.013	0.009	0.022	0.119	0.111	0.062	0.003	0.032	0.375	0.032	0.017	0.024
cg01971612	0.006	0.006	0.006	0.008	0.006	0.008	0.011	0.081	0.008	0.044	0.012	0.006	0.336	0.007	0.002	0.189
cg18485485	0.014	0.015	0.016	0.014	0.014	0.013	0.02	0.074	0.011	0.051	0.004	0.005	0.363	0.019	0.015	0.209
cg21698802	0.05	0.053	0.053	0.048	0.051	0.049	0.053	0.07	0.061	0.072	0.072	0.069	0.326	0.074	0.073	0.213
cg03317082	0.029	0.031	0.034	0.034	0.037	0.031	0.047	0.06	0.038	0.065	0.035	0.042	0.496	0.108	0.047	0.04
cg08863539	0.035	0.044	0.047	0.032	0.042	0.042	0.021	0.086	0.014	0.041	0.018	0.028	0.417	0.032	0.044	0.049
cg12111697	0.07	0.069	0.07	0.066	0.072	0.064	0.077	0.092	0.068	0.11	0.07	0.102	0.382	0.09	0.097	0.105
cg24838654	0.016	0.016	0.024	0.016	0.025	0.012	0.012	0.052	0.016	0.068	0.018	0.009	0.565	0.102	0.096	0.3
cg18023401	0.043	0.048	0.06	0.04	0.065	0.056	0.07	0.122	0.059	0.107	0.045	0.023	0.678	0.124	0.147	0.126
cg27258025	0.019	0.03	0.025	0.024	0.038	0.02	0.031	0.124	0.027	0.464	0.031	0.075	0.788	0.022	0.018	0.296
cg03077453	0.109	0.183	0.194	0.118	0.24	0.082	0.091	0.103	0.06	0.404	0.056	0.21	0.86	0.064	0.072	0.349
cg14025336	0.07	0.134	0.147	0.089	0.174	0.049	0.076	0.124	0.038	0.354	0.082	0.141	0.818	0.046	0.06	0.328
cg20725941	0.036	0.052	0.057	0.032	0.048	0.032	0.053	0.121	0.017	0.249	0	0.072	0.798	0.029	0.019	0.297
cg12950007	0.065	0.102	0.092	0.072	0.109	0.062	0.081	0.121	0.067	0.498	0.093	0.144	0.807	0.077	0.07	0.342
cg10661629	0.016	0.013	0.012	0.012	0.013	0.009	0.024	0.083	0.02	0.053	0.054	0.038	0.427	0.017	0.021	0.212
cg15784913	0.024	0.02	0.02	0.018	0.025	0.024	0.024	0.126	0.014	0.037	0.016	0.045	0.457	0.039	0.038	0.212
cg03108330	0.032	0.034	0.036	0.031	0.031	0.033	0.052	0.124	0.024	0.071	0.037	0.041	0.379	0.072	0.068	0.201
cg18608369	0.015	0.014	0.014	0.013	0.011	0.015	0.012	0.051	0.012	0.411	0.012	0.028	0.845	0.013	0.031	0.419
cg01348733	0.032	0.03	0.035	0.029	0.034	0.033	0.03	0.08	0.026	0.495	0.066	0.099	0.827	0.055	0.078	0.432
cg05224998	0.023	0.024	0.027	0.027	0.029	0.025	0.022	0.105	0.044	0.213	0.05	0.066	0.79	0.032	0.033	0.39
cg10911913	0.034	0.035	0.031	0.032	0.041	0.033	0.032	0.054	0.062	0.198	0.049	0.075	0.811	0.058	0.052	0.424
cg15406666	0.017	0.022	0.022	0.017	0.019	0.023	0.034	0.083	0.021	0.04	0.038	0.008	0.504	0.055	0.047	0.262
cg20483560	0.041	0.043	0.041	0.043	0.042	0.04	0.04	0.062	0.041	0.09	0.033	0.063	0.476	0.087	0.074	0.274
cg16609855	0.054	0.054	0.061	0.054	0.053	0.06	0.067	0.077	0.057	0.081	0.058	0.091	0.488	0.103	0.107	0.265
cg16398628	0.049	0.046	0.06	0.048	0.053	0.053	0.056	0.086	0.052	0.125	0.048	0.037	0.216	0.075	0.083	0.121
cg06886207	0.007	0.009	0.01	0.011	0.009	0.006	0.024	0.055	0.003	0.04	0.011	0.013	0.265	0.011	0.012	0.154
cg14286274	0.014	0.015	0.017	0.017	0.014	0.016	0.023	0.1	0.022	0.045	0.015	0.017	0.234	0.016	0.018	0.142
cg26255011	0.03	0.032	0.038	0.037	0.033	0.042	0.047	0.098	0.039	0.076	0.05	0.026	0.261	0.072	0.049	0.182
cg08589960	0.008	0.011	0.011	0.008	0.011	0.007	0.015	0.048	0.139	0.031	0.01	0.03	0.651	0.493	0.056	0.049
cg03891598	0.021	0.018	0.019	0.02	0.021	0.018	0.021	0.078	0.191	0.057	0.05	0.037	0.659	0.464	0.081	0.084
cg00187635	0.016	0.031	0.029	0.012	0.011	0.028	0.047	0.137	0.168	0.111	0.034	0.076	0.715	0.575	0.068	0.057
cg13173898	0.01	0.01	0.012	0.014	0.011	0.013	0.037	0.061	0.03	0.041	0.025	0.047	0.605	0.412	0.045	0.093
cg11109809	0.013	0.008	0.016	0.017	0.011	0.014	0.012	0.06	0.015	0.028	0	0.007	0.463	0.176	0.04	0.254
cg14427694	0.041	0.039	0.041	0.051	0.039	0.041	0.043	0.058	0.044	0.067	0.044	0.05	0.429	0.177	0.07	0.244
cg14380270	0.01	0.012	0.016	0.011	0.014	0.011	0.008	0.065	0.032	0.483	0.076	0.034	0.888	0.034	0.025	0.455
cg18608369	0.015	0.014	0.014	0.013	0.011	0.015	0.012	0.051	0.012	0.411	0.012	0.028	0.845	0.013	0.031	0.419
cg01348733	0.032	0.03	0.035	0.029	0.034	0.033	0.03	0.08	0.026	0.495	0.066	0.099	0.827	0.055	0.078	0.432
cg12581244	0.026	0.027	0.025	0.028	0.025	0.029	0.069	0.157	0.019	0.194	0.032	0.033	0.851	0.056	0.057	0.457
cg18411103	0.066	0.07	0.073	0.068	0.063	0.068	0.084	0.101	0.085	0.195	0.12	0.092	0.744	0.113	0.116	0.41
cg15449323	0.013	0.057	0.024	0.015	0.029	0.018	0.024	0.116	0.048	0.271	0.056	0.067	0.765	0.031	0.023	0.325
cg14582763	0.156	0.31	0.256	0.146	0.299	0.122	0.137	0.201	0.042	0.715	0.047	0.293	0.719	0.057	0.05	0.348
cg13461241	0.035	0.116	0.064	0.032	0.078	0.029	0.042	0.099	0.082	0.626	0.097	0.164	0.848	0.034	0.037	0.368
cg13283691	0.023	0.071	0.045	0.041	0.05	0.019	0.029	0.155	0.095	0.113	0.064	0.046	0.584	0.058	0.018	0.032
cg26727807	0.026	0.029	0.029	0.037	0.033	0.033	0.049	0.187	0.036	0.144	0.077	0.031	0.483	0.151	0.052	0.047
cg18094824	0.024	0.024	0.024	0.021	0.024	0.018	0.025	0.054	0.022	0.088	0.058	0.046	0.643	0.309	0.143	0.068
cg09517106	0.035	0.039	0.033	0.037	0.034	0.035	0.078	0.13	0.037	0.14	0.062	0.051	0.826	0.403	0.053	0.054
cg01247919	0.038	0.034	0.035	0.036	0.034	0.033	0.03	0.063	0.049	0.087	0.016	0.043	0.57	0.237	0.054	0.063
cg10661629	0.016	0.013	0.012	0.012	0.013	0.009	0.024	0.083	0.02	0.053	0.054	0.038	0.427	0.017	0.021	0.212
cg15784913	0.024	0.02	0.02	0.018	0.025	0.024	0.024	0.126	0.014	0.037	0.016	0.045	0.457	0.039	0.038	0.212
cg05224998	0.023	0.024	0.027	0.027	0.029	0.025	0.022	0.105	0.044	0.213	0.05	0.066	0.79	0.032	0.033	0.39
cg10911913	0.034	0.035	0.031	0.032	0.041	0.033	0.032	0.054	0.062	0.198	0.049	0.075	0.811	0.058	0.052	0.424
cg09267217	0.025	0.037	0.031	0.026	0.036	0.028	0.023	0.161	0.019	0.4	0.007	0.063	0.833	0.03	0.03	0.333
cg22935432	0.03	0.043	0.038	0.035	0.029	0.035	0.048	0.137	0.029	0.161	0.045	0.058	0.58	0.071	0.049	0.24
cg27258025	0.019	0.03	0.025	0.024	0.038	0.02	0.031	0.124	0.027	0.464	0.031	0.075	0.788	0.022	0.018	0.296
cg12950007	0.065	0.102	0.092	0.072	0.109	0.062	0.081	0.121	0.067	0.498	0.093	0.144	0.807	0.077	0.07	0.342
cg04364339	0.004	0.012	0.018	0.008	0.015	0.013	0.006	0.131	0.189	0.091	0.093	0.007	0.463	0.078	0.001	0.03
cg03894174	0.053	0.051	0.057	0.043	0.049	0.048	0.055	0.078	0.055	0.086	0.053	0.096	0.834	0.058	0.08	0.398
cg14813417	0.022	0.027	0.029	0.032	0.034	0.022	0.038	0.108	0.022	0.114	0.016	0.037	0.48	0.153	0.041	0.035
cg09171882	0.022	0.02	0.019	0.018	0.017	0.019	0.223	0.067	0.06	0.078	0.033	0.03	0.557	0.178	0.033	0.034
cg07310984	0.026	0.026	0.046	0.027	0.04	0.026	0.035	0.065	0.211	0.088	0.043	0.068	0.656	0.205	0.058	0.046
cg06353720	0.024	0.03	0.089	0.038	0.083	0.03	0.048	0.074	0.212	0.102	0.054	0.057	0.786	0.366	0.15	0.209
cg26257082	0.039	0.042	0.148	0.037	0.137	0.042	0.037	0.078	0.024	0.081	0.038	0.111	0.612	0.079	0.027	0.024
cg09267217	0.025	0.037	0.031	0.026	0.036	0.028	0.023	0.161	0.019	0.4	0.007	0.063	0.833	0.03	0.03	0.333
cg22935432	0.03	0.043	0.038	0.035	0.029	0.035	0.048	0.137	0.029	0.161	0.045	0.058	0.58	0.071	0.049	0.24
cg27258025	0.019	0.03	0.025	0.024	0.038	0.02	0.031	0.124	0.027	0.464	0.031	0.075	0.788	0.022	0.018	0.296
cg20725941	0.036	0.052	0.057	0.032	0.048	0.032	0.053	0.121	0.017	0.249	0	0.072	0.798	0.029	0.019	0.297
cg12950007	0.065	0.102	0.092	0.072	0.109	0.062	0.081	0.121	0.067	0.498	0.093	0.144	0.807	0.077	0.07	0.342
cg08873805	0.016	0.093	0.025	0.017	0.033	0.016	0.028	0.126	0.008	0.288	0	0.058	0.767	0.083	0.085	0.356
cg10196802	0.091	0.091	0.097	0.09	0.092	0.083	0.049	0.156	0.027	0.075	0.057	0.063	0.45	0.218	0.12	0.287
cg14505161	0.009	0.011	0.015	0.019	0.011	0.01	0.021	0.051	0.03	0.032	0.019	0.003	0.433	0.157	0.06	0.256
cg11387077	0.095	0.096	0.099	0.091	0.086	0.105	0.086	0.21	0.012	0.084	0.063	0.086	0.539	0.261	0.15	0.333
cg12881726	0.011	0.016	0.016	0.021	0.011	0.01	0.014	0.056	0.014	0.033	0.007	0.004	0.316	0.095	0.042	0.187
cg23780937	0.061	0.064	0.055	0.061	0.052	0.059	0.065	0.095	0.074	0.081	0.089	0.065	0.438	0.224	0.115	0.265
cg23671719	0.015	0.02	0.018	0.018	0.019	0.015	0.029	0.079	0.007	0.05	0.015	0.015	0.361	0.028	0.03	0.026
cg23100979	0.005	0.007	0.009	0.009	0.005	0.004	0.012	0.071	0.011	0.046	0.023	0.004	0.33	0	0.009	0.023
cg14226678	0.035	0.034	0.044	0.034	0.035	0.035	0.039	0.087	0.009	0.04	0.011	0.022	0.358	0.053	0.051	0.057
cg11228682	0.039	0.128	0.028	0.03	0.025	0.079	0.045	0.105	0.076	0.131	0.084	0.046	0.719	0.25	0.048	0.062
cg19091784	0.009	0.011	0.012	0.029	0.014	0.012	0.015	0.046	0.054	0.031	0.007	0.004	0.577	0.329	0.067	0.106
cg26029997	0.011	0.013	0.014	0.033	0.013	0.015	0.051	0.122	0.069	0.058	0.003	0.019	0.554	0.335	0.071	0.082
cg09692335	0.04	0.04	0.04	0.041	0.039	0.039	0.051	0.055	0.047	0.078	0.055	0.063	0.268	0.114	0.068	0.069
cg13838014	0.005	0.005	0.006	0.005	0.006	0.005	0.014	0.054	0.114	0.055	0.046	0.014	0.335	0.117	0.06	0.055
cg06476606	0.04	0.038	0.04	0.041	0.038	0.04	0.053	0.076	0.055	0.075	0.044	0.07	0.543	0.181	0.059	0.056
cg24838654	0.016	0.016	0.024	0.016	0.025	0.012	0.012	0.052	0.016	0.068	0.018	0.009	0.565	0.102	0.096	0.3
cg18023401	0.043	0.048	0.06	0.04	0.065	0.056	0.07	0.122	0.059	0.107	0.045	0.023	0.678	0.124	0.147	0.126
cg08063125	0.007	0.053	0.021	0.008	0.054	0.007	0.006	0.073	0.004	0.094	0	0.053	0.302	0.004	0.009	0.112
cg03668718	0.033	0.037	0.048	0.037	0.045	0.033	0.043	0.141	0.043	0.426	0.075	0.119	0.87	0.044	0.075	0.457
cg11309496	0.011	0.009	0.084	0.017	0.11	0.01	0.044	0.118	0.024	0.382	0.023	0.074	0.841	0.025	0.031	0.448
cg18108623	0.061	0.066	0.083	0.063	0.088	0.061	0.083	0.093	0.156	0.459	0.123	0.123	0.819	0.12	0.139	0.47
cg04741284	0.033	0.035	0.033	0.034	0.034	0.036	0.079	0.242	0.03	0.069	0.075	0.056	0.674	0.239	0.042	0.1
cg15019617	0.03	0.041	0.05	0.036	0.047	0.032	0.047	0.082	0.033	0.098	0.043	0.059	0.573	0.204	0.096	0.071
cg15550572	0.02	0.029	0.029	0.024	0.03	0.031	0.022	0.053	0.053	0.121	0.02	0.044	0.544	0.24	0.085	0.119
cg17184704	0.022	0.022	0.023	0.018	0.024	0.023	0.128	0.064	0.087	0.085	0.042	0.009	0.765	0.549	0.117	0.085
cg25153601	0.005	0.009	0.009	0.007	0.008	0.007	0.016	0.054	0.008	0.041	0.009	0.014	0.466	0.012	0.012	0.21
cg23670932	0.017	0.02	0.017	0.016	0.017	0.017	0.037	0.098	0.025	0.129	0.059	0.023	0.45	0.046	0.022	0.224
cg25503881	0.03	0.035	0.044	0.033	0.046	0.034	0.042	0.067	0.038	0.09	0.059	0.062	0.452	0.068	0.043	0.206
cg06483076	0.051	0.063	0.072	0.047	0.072	0.058	0.079	0.144	0.095	0.191	0.066	0.042	0.543	0.083	0.072	0.274
cg14505161	0.009	0.011	0.015	0.019	0.011	0.01	0.021	0.051	0.03	0.032	0.019	0.003	0.433	0.157	0.06	0.256
cg12881726	0.011	0.016	0.016	0.021	0.011	0.01	0.014	0.056	0.014	0.033	0.007	0.004	0.316	0.095	0.042	0.187
cg21613364	0.037	0.038	0.039	0.04	0.035	0.042	0.053	0.13	0.005	0.049	0.013	0.05	0.574	0.063	0.064	0.322
cg14979301	0.01	0.008	0.015	0.008	0.01	0.013	0.021	0.254	0.085	0.085	0.112	0.03	0.963	0.048	0.037	0.907
cg00892567	0.047	0.063	0.057	0.047	0.052	0.047	0.057	0.064	0.052	0.106	0.055	0.083	0.732	0.366	0.086	0.073
cg08393070	0.009	0.028	0.029	0.017	0.034	0.014	0.021	0.066	0.03	0.376	0.033	0.09	0.473	0.03	0.018	0.018
cg09812623	0.069	0.108	0.108	0.077	0.121	0.069	0.082	0.123	0.076	0.401	0.086	0.131	0.52	0.106	0.064	0.285
cg12036544	0.032	0.19	0.087	0.045	0.085	0.02	0.036	0.105	0.231	0.121	0.043	0.09	0.79	0.215	0.017	0.042
[truncated: 2,713 more rows]

## Sheet: 14CT_Ref_Atlas_Fig2
CpG	Monocytes	B-cells	CD4T-cells	NK-cells	CD8T-cells	Neutrophils	Vascular endothelial cells	Mesenchymal SC	Cortical neurons	Astrocytes	Oligodendrocytes	Microglia	Neural progenitors	OP
cg08169020	0.887	0.262	0.015	0.078	0.016	0.868	0.032	0.086	0.021	0.032	0.009	0.442	0.183	0.008
cg25170017	0.886	0.512	0.102	0.436	0.087	0.704	0.097	0.142	0.445	0.041	0.079	0.581	0.494	0.221
cg13522882	0.856	0.629	0.235	0.716	0.335	0.866	0.146	0.08	0.066	0.079	0.039	0.682	0.073	0.042
cg01424562	0.849	0.559	0.107	0.41	0.132	0.837	0.181	0.132	0.107	0.127	0.062	0.636	0.5	0.168
cg14789659	0.819	0.683	0.217	0.62	0.525	0.854	0.17	0.102	0.051	0.097	0.047	0.409	0.088	0.056
cg00928816	0.796	0.682	0.327	0.644	0.553	0.854	0.223	0.143	0.111	0.073	0.059	0.52	0.078	0.069
cg20746552	0.697	0.643	0.321	0.563	0.544	0.759	0.23	0.158	0.106	0.106	0.076	0.436	0.077	0.073
cg16389209	0.749	0.6	0.288	0.602	0.496	0.804	0.203	0.126	0.095	0.073	0.06	0.406	0.127	0.096
cg19163395	0.883	0.857	0.129	0.868	0.174	0.924	0.323	0.171	0.016	0.044	0.025	0.634	0.03	0.03
cg07218880	0.741	0.38	0.155	0.085	0.177	0.805	0.319	0.142	0.058	0.122	0.125	0.591	0.429	0.178
cg12827637	0.521	0.361	0.023	0.212	0.022	0.537	0.08	0.109	0.011	0.059	0.058	0.508	0.379	0.15
cg11975790	0.725	0.248	0.158	0.64	0.189	0.756	0.442	0.195	0.042	0.167	0.046	0.579	0.085	0.051
cg25607383	0.786	0.516	0.444	0.689	0.467	0.779	0.472	0.335	0.125	0.327	0.133	0.638	0.355	0.148
cg27377289	0.895	0.041	0.111	0.734	0.168	0.901	0.617	0.154	0.119	0.196	0.084	0.701	0.609	0.058
cg00458932	0.811	0.581	0.407	0.683	0.436	0.784	0.178	0.02	0.219	0.062	0.206	0.378	0.055	0.068
cg02962602	0.557	0.481	0.327	0.281	0.231	0.494	0.181	0.082	0.037	0.066	0.05	0.308	0.208	0.054
cg05052463	0.855	0.155	0.478	0.579	0.443	0.846	0.294	0.1	0.04	0.239	0.117	0.732	0.346	0.042
cg00936790	0.8	0.578	0.132	0.535	0.286	0.79	0.168	0.099	0.467	0.093	0.059	0.462	0.436	0.045
cg02737268	0.913	0.098	0.141	0.358	0.135	0.899	0.407	0.724	0.073	0.927	0.426	0.453	0.102	0.07
cg07520810	0.549	0.551	0.255	0.527	0.471	0.637	0.131	0.087	0.067	0.052	0.041	0.356	0.063	0.04
cg14789659	0.819	0.683	0.217	0.62	0.525	0.854	0.17	0.102	0.051	0.097	0.047	0.409	0.088	0.056
cg00928816	0.796	0.682	0.327	0.644	0.553	0.854	0.223	0.143	0.111	0.073	0.059	0.52	0.078	0.069
cg20746552	0.697	0.643	0.321	0.563	0.544	0.759	0.23	0.158	0.106	0.106	0.076	0.436	0.077	0.073
cg16401465	0.76	0.66	0.333	0.698	0.576	0.815	0.183	0.108	0.126	0.11	0.085	0.457	0.242	0.108
cg16389209	0.749	0.6	0.288	0.602	0.496	0.804	0.203	0.126	0.095	0.073	0.06	0.406	0.127	0.096
cg18198306	0.38	0.305	0.1	0.293	0.124	0.274	0.137	0.22	0.053	0.15	0.068	0.226	0.037	0.034
cg04858631	0.659	0.148	0.079	0.052	0.161	0.644	0.219	0.137	0.231	0.718	0.1	0.499	0.432	0.126
cg20805133	0.929	0.371	0.028	0.41	0.028	0.917	0.102	0.217	0.095	0.868	0.058	0.625	0.784	0.51
cg25979108	0.21	0.159	0.095	0.12	0.092	0.138	0.06	0.095	0.035	0.098	0.039	0.109	0.042	0.052
cg27037013	0.722	0.618	0.186	0.18	0.155	0.708	0.589	0.422	0.081	0.159	0.144	0.54	0.057	0.068
cg08832851	0.392	0.038	0.036	0.05	0.036	0.43	0.166	0.115	0.214	0.183	0.465	0.312	0.019	0.061
cg14789659	0.819	0.683	0.217	0.62	0.525	0.854	0.17	0.102	0.051	0.097	0.047	0.409	0.088	0.056
cg00928816	0.796	0.682	0.327	0.644	0.553	0.854	0.223	0.143	0.111	0.073	0.059	0.52	0.078	0.069
cg20746552	0.697	0.643	0.321	0.563	0.544	0.759	0.23	0.158	0.106	0.106	0.076	0.436	0.077	0.073
cg16389209	0.749	0.6	0.288	0.602	0.496	0.804	0.203	0.126	0.095	0.073	0.06	0.406	0.127	0.096
cg16829306	0.375	0.298	0.113	0.208	0.067	0.365	0.11	0.121	0.075	0.1	0.091	0.333	0.078	0.083
cg11006453	0.885	0.633	0.226	0.525	0.192	0.887	0.22	0.2	0.017	0.054	0.815	0.372	0.562	0.137
cg23731089	0.926	0.75	0.329	0.806	0.319	0.927	0.337	0.33	0.068	0.117	0.557	0.695	0.575	0.126
cg13157980	0.371	0.492	0.075	0.261	0.074	0.487	0.12	0.074	0.037	0.074	0.151	0.231	0.374	0.083
cg25526001	0.74	0.244	0.261	0.348	0.377	0.738	0.392	0.277	0.068	0.09	0.091	0.579	0.473	0.119
cg20897136	0.326	0.264	0.102	0.111	0.088	0.32	0.176	0.119	0.114	0.244	0.096	0.322	0.12	0.162
cg01839993	0.438	0.221	0.078	0.096	0.104	0.405	0.245	0.113	0.117	0.494	0.102	0.386	0.247	0.259
cg10592592	0.34	0.186	0.063	0.068	0.057	0.318	0.152	0.086	0.066	0.212	0.083	0.317	0.135	0.13
cg05056497	0.728	0.596	0.225	0.185	0.376	0.454	0.123	0.102	0.372	0.089	0.258	0.437	0.673	0.16
cg05906166	0.382	0.19	0.047	0.049	0.043	0.438	0.155	0.119	0.173	0.145	0.302	0.343	0.037	0.087
cg19692929	0.437	0.309	0.049	0.192	0.075	0.463	0.2	0.194	0.1	0.257	0.098	0.363	0.086	0.051
cg12474798	0.52	0.42	0.29	0.498	0.347	0.532	0.13	0.158	0.015	0.04	0.02	0.412	0.026	0.028
cg20684110	0.536	0.392	0.34	0.515	0.405	0.54	0.161	0.262	0.035	0.111	0.078	0.385	0.084	0.11
cg01005506	0.327	0.335	0.235	0.315	0.257	0.329	0.134	0.082	0.045	0.087	0.067	0.325	0.06	0.064
cg08309687	0.548	0.586	0.085	0.08	0.077	0.593	0.395	0.452	0.047	0.093	0.158	0.42	0.086	0.053
cg06578276	0.637	0.529	0.338	0.531	0.309	0.624	0.375	0.11	0.072	0.073	0.121	0.394	0.096	0.078
cg11316887	0.825	0.151	0.267	0.085	0.187	0.876	0.347	0.135	0.778	0.293	0.331	0.644	0.409	0.251
cg17150898	0.858	0.549	0.175	0.842	0.296	0.852	0.338	0.398	0.016	0.578	0.187	0.577	0.03	0.104
cg22109530	0.663	0.528	0.408	0.595	0.392	0.671	0.074	0.147	0.216	0.182	0.101	0.486	0.011	0.014
cg14515791	0.875	0.792	0.718	0.837	0.703	0.872	0.216	0.197	0.291	0.21	0.138	0.772	0.132	0.136
cg25499543	0.849	0.801	0.566	0.736	0.612	0.834	0.227	0.154	0.119	0.106	0.121	0.713	0.432	0.156
cg25503381	0.769	0.659	0.429	0.619	0.467	0.769	0.179	0.152	0.116	0.128	0.088	0.62	0.164	0.076
cg07438103	0.586	0.488	0.143	0.427	0.094	0.575	0.161	0.144	0.139	0.143	0.098	0.518	0.267	0.216
cg12897164	0.634	0.06	0.437	0.098	0.341	0.823	0.198	0.076	0.293	0.081	0.084	0.521	0.503	0.186
cg19645639	0.726	0.537	0.375	0.739	0.458	0.791	0.189	0.052	0.051	0.057	0.049	0.616	0.064	0.26
cg07520810	0.549	0.551	0.255	0.527	0.471	0.637	0.131	0.087	0.067	0.052	0.041	0.356	0.063	0.04
cg14789659	0.819	0.683	0.217	0.62	0.525	0.854	0.17	0.102	0.051	0.097	0.047	0.409	0.088	0.056
cg00928816	0.796	0.682	0.327	0.644	0.553	0.854	0.223	0.143	0.111	0.073	0.059	0.52	0.078	0.069
cg20746552	0.697	0.643	0.321	0.563	0.544	0.759	0.23	0.158	0.106	0.106	0.076	0.436	0.077	0.073
cg16389209	0.749	0.6	0.288	0.602	0.496	0.804	0.203	0.126	0.095	0.073	0.06	0.406	0.127	0.096
cg07520810	0.549	0.551	0.255	0.527	0.471	0.637	0.131	0.087	0.067	0.052	0.041	0.356	0.063	0.04
cg16401465	0.76	0.66	0.333	0.698	0.576	0.815	0.183	0.108	0.126	0.11	0.085	0.457	0.242	0.108
cg16389209	0.749	0.6	0.288	0.602	0.496	0.804	0.203	0.126	0.095	0.073	0.06	0.406	0.127	0.096
cg16215084	0.829	0.823	0.362	0.82	0.472	0.797	0.338	0.192	0.072	0.08	0.111	0.726	0.063	0.056
cg25251478	0.845	0.834	0.447	0.835	0.533	0.827	0.437	0.274	0.105	0.106	0.128	0.733	0.12	0.11
cg14611816	0.536	0.449	0.329	0.468	0.281	0.52	0.303	0.099	0.052	0.076	0.089	0.352	0.097	0.064
cg07520810	0.549	0.551	0.255	0.527	0.471	0.637	0.131	0.087	0.067	0.052	0.041	0.356	0.063	0.04
cg20746552	0.697	0.643	0.321	0.563	0.544	0.759	0.23	0.158	0.106	0.106	0.076	0.436	0.077	0.073
cg16401465	0.76	0.66	0.333	0.698	0.576	0.815	0.183	0.108	0.126	0.11	0.085	0.457	0.242	0.108
cg16389209	0.749	0.6	0.288	0.602	0.496	0.804	0.203	0.126	0.095	0.073	0.06	0.406	0.127	0.096
cg03626672	0.717	0.559	0.678	0.519	0.353	0.713	0.222	0.158	0.199	0.132	0.18	0.542	0.017	0.027
cg03974193	0.781	0.723	0.282	0.832	0.368	0.821	0.194	0.252	0.105	0.195	0.053	0.724	0.087	0.056
cg11895835	0.877	0.262	0.263	0.588	0.317	0.845	0.227	0.14	0.233	0.151	0.575	0.669	0.694	0.306
cg10509607	0.706	0.673	0.063	0.644	0.11	0.633	0.115	0.119	0.118	0.132	0.063	0.613	0.833	0.13
cg20968678	0.759	0.555	0.229	0.56	0.277	0.739	0.556	0.37	0.132	0.187	0.118	0.586	0.171	0.089
cg06025456	0.87	0.555	0.916	0.588	0.919	0.901	0.089	0.13	0.037	0.361	0.049	0.67	0.014	0.02
cg23359665	0.89	0.589	0.922	0.595	0.932	0.898	0.145	0.142	0.021	0.425	0.051	0.683	0.006	0.026
cg13934406	0.85	0.554	0.872	0.551	0.895	0.859	0.104	0.137	0.023	0.432	0.059	0.758	0.008	0.025
cg25426302	0.865	0.69	0.858	0.725	0.884	0.86	0.259	0.195	0.038	0.545	0.169	0.719	0.067	0.121
cg06108383	0.88	0.689	0.892	0.645	0.909	0.883	0.317	0.216	0.056	0.503	0.178	0.72	0.13	0.226
cg17113856	0.758	0.594	0.823	0.594	0.838	0.75	0.308	0.212	0.071	0.486	0.159	0.607	0.081	0.148
cg25913761	0.836	0.221	0.282	0.47	0.396	0.829	0.365	0.383	0.219	0.759	0.397	0.649	0.778	0.517
cg26955540	0.766	0.022	0.149	0.401	0.347	0.791	0.238	0.114	0.093	0.68	0.026	0.586	0.755	0.442
cg26637901	0.123	0.136	0.116	0.13	0.109	0.128	0.16	0.216	0.249	0.266	0.235	0.12	0.181	0.23
cg19789919	0.308	0.246	0.159	0.17	0.075	0.24	0.069	0.253	0.176	0.213	0.094	0.075	0.028	0.08
cg06025456	0.87	0.555	0.916	0.588	0.919	0.901	0.089	0.13	0.037	0.361	0.049	0.67	0.014	0.02
cg23359665	0.89	0.589	0.922	0.595	0.932	0.898	0.145	0.142	0.021	0.425	0.051	0.683	0.006	0.026
cg13934406	0.85	0.554	0.872	0.551	0.895	0.859	0.104	0.137	0.023	0.432	0.059	0.758	0.008	0.025
cg10551329	0.785	0.555	0.843	0.55	0.879	0.785	0.148	0.295	0.029	0.517	0.155	0.632	0.047	0.104
cg06108383	0.88	0.689	0.892	0.645	0.909	0.883	0.317	0.216	0.056	0.503	0.178	0.72	0.13	0.226
cg16481280	0.899	0.743	0.893	0.767	0.92	0.901	0.254	0.16	0.026	0.556	0.397	0.78	0.055	0.228
cg17113856	0.758	0.594	0.823	0.594	0.838	0.75	0.308	0.212	0.071	0.486	0.159	0.607	0.081	0.148
cg02505177	0.78	0.042	0.141	0.138	0.11	0.748	0.337	0.148	0.258	0.734	0.438	0.586	0.661	0.427
cg23491841	0.696	0.504	0.083	0.069	0.058	0.661	0.401	0.171	0.092	0.323	0.144	0.574	0.749	0.435
cg07976603	0.32	0.291	0.085	0.309	0.085	0.312	0.11	0.108	0.081	0.1	0.037	0.262	0.089	0.092
cg27183818	0.9	0.046	0.245	0.064	0.203	0.884	0.392	0.154	0.325	0.107	0.885	0.729	0.833	0.663
cg26047334	0.725	0.456	0.323	0.529	0.325	0.644	0.125	0.218	0.754	0.088	0.09	0.563	0.22	0.122
cg06346307	0.731	0.479	0.332	0.675	0.377	0.671	0.249	0.259	0.295	0.32	0.115	0.558	0.068	0.1
cg23007665	0.785	0.019	0.026	0.032	0.03	0.696	0.115	0.168	0.801	0.203	0.716	0.668	0.826	0.532
cg26757820	0.591	0.179	0.089	0.425	0.287	0.548	0.173	0.12	0.057	0.759	0.091	0.463	0.397	0.061
cg20749792	0.869	0.877	0.137	0.594	0.284	0.85	0.166	0.091	0.405	0.765	0.091	0.703	0.342	0.074
cg07586956	0.902	0.617	0.254	0.077	0.102	0.911	0.587	0.407	0.31	0.733	0.193	0.668	0.464	0.26
cg06025456	0.87	0.555	0.916	0.588	0.919	0.901	0.089	0.13	0.037	0.361	0.049	0.67	0.014	0.02
cg23359665	0.89	0.589	0.922	0.595	0.932	0.898	0.145	0.142	0.021	0.425	0.051	0.683	0.006	0.026
cg13934406	0.85	0.554	0.872	0.551	0.895	0.859	0.104	0.137	0.023	0.432	0.059	0.758	0.008	0.025
cg06108383	0.88	0.689	0.892	0.645	0.909	0.883	0.317	0.216	0.056	0.503	0.178	0.72	0.13	0.226
cg17113856	0.758	0.594	0.823	0.594	0.838	0.75	0.308	0.212	0.071	0.486	0.159	0.607	0.081	0.148
cg12947138	0.781	0.636	0.573	0.737	0.558	0.751	0.336	0.117	0.13	0.084	0.083	0.686	0.088	0.086
cg06608359	0.39	0.324	0.081	0.276	0.096	0.424	0.19	0.121	0.058	0.093	0.099	0.357	0.208	0.113
cg10807894	0.64	0.532	0.369	0.636	0.386	0.714	0.117	0.023	0.06	0.047	0.02	0.535	0.387	0.184
cg18887230	0.871	0.82	0.392	0.863	0.674	0.865	0.153	0.135	0.086	0.135	0.056	0.724	0.243	0.315
cg16767506	0.613	0.447	0.092	0.147	0.115	0.647	0.432	0.354	0.698	0.795	0.448	0.645	0.138	0.322
cg02745912	0.36	0.229	0.048	0.065	0.063	0.404	0.128	0.123	0.508	0.363	0.116	0.482	0.076	0.12
cg13264840	0.754	0.507	0.087	0.145	0.086	0.758	0.307	0.26	0.723	0.487	0.31	0.74	0.098	0.241
cg05204104	0.555	0.596	0.054	0.063	0.053	0.524	0.37	0.13	0.053	0.674	0.304	0.564	0.052	0.068
cg06401414	0.889	0.532	0.426	0.764	0.488	0.888	0.398	0.544	0.061	0.049	0.089	0.642	0.659	0.081
cg10316899	0.821	0.671	0.123	0.708	0.204	0.832	0.216	0.184	0.158	0.099	0.161	0.63	0.859	0.347
cg06382930	0.457	0.416	0.066	0.37	0.098	0.443	0.243	0.153	0.121	0.342	0.121	0.412	0.067	0.039
cg19628600	0.789	0.72	0.525	0.711	0.625	0.785	0.105	0.104	0.388	0.096	0.073	0.595	0.108	0.157
cg00839844	0.404	0.374	0.196	0.094	0.199	0.278	0.125	0.134	0.079	0.117	0.085	0.412	0.159	0.308
cg08884752	0.716	0.829	0.123	0.849	0.418	0.761	0.162	0.147	0.047	0.085	0.254	0.49	0.258	0.113
cg08063160	0.776	0.097	0.534	0.315	0.384	0.758	0.12	0.163	0.081	0.44	0.513	0.613	0.554	0.361
cg10983484	0.755	0.051	0.489	0.776	0.617	0.742	0.201	0.087	0.442	0.069	0.52	0.604	0.081	0.12
cg12474798	0.52	0.42	0.29	0.498	0.347	0.532	0.13	0.158	0.015	0.04	0.02	0.412	0.026	0.028
cg20684110	0.536	0.392	0.34	0.515	0.405	0.54	0.161	0.262	0.035	0.111	0.078	0.385	0.084	0.11
cg01005506	0.327	0.335	0.235	0.315	0.257	0.329	0.134	0.082	0.045	0.087	0.067	0.325	0.06	0.064
cg14034325	0.508	0.478	0.263	0.326	0.271	0.502	0.159	0.15	0.203	0.138	0.097	0.48	0.062	0.112
cg13554018	0.789	0.103	0.277	0.068	0.179	0.75	0.562	0.405	0.274	0.323	0.507	0.6	0.549	0.437
cg04370983	0.579	0.418	0.156	0.344	0.199	0.525	0.296	0.189	0.244	0.101	0.27	0.463	0.29	0.2
cg08659179	0.725	0.566	0.518	0.537	0.508	0.712	0.165	0.116	0.045	0.63	0.069	0.658	0.038	0.062
cg11654325	0.697	0.556	0.163	0.185	0.1	0.691	0.395	0.259	0.13	0.337	0.213	0.612	0.458	0.355
cg00669330	0.872	0.836	0.369	0.588	0.249	0.868	0.652	0.535	0.287	0.416	0.472	0.739	0.767	0.685
cg24503369	0.856	0.718	0.537	0.73	0.575	0.852	0.243	0.128	0.185	0.163	0.398	0.71	0.125	0.112
cg20038070	0.767	0.695	0.478	0.575	0.549	0.75	0.316	0.119	0.039	0.562	0.081	0.639	0.065	0.039
cg15142819	0.874	0.838	0.219	0.159	0.203	0.854	0.149	0.179	0.736	0.346	0.092	0.732	0.697	0.39
cg17970299	0.879	0.889	0.856	0.826	0.867	0.869	0.288	0.064	0.047	0.067	0.117	0.681	0.033	0.024
cg22485298	0.65	0.062	0.375	0.618	0.451	0.649	0.447	0.195	0.091	0.138	0.089	0.501	0.389	0.154
cg17587997	0.887	0.088	0.118	0.088	0.128	0.891	0.872	0.837	0.473	0.843	0.095	0.703	0.285	0.262
cg11006453	0.885	0.633	0.226	0.525	0.192	0.887	0.22	0.2	0.017	0.054	0.815	0.372	0.562	0.137
cg23731089	0.926	0.75	0.329	0.806	0.319	0.927	0.337	0.33	0.068	0.117	0.557	0.695	0.575	0.126
cg06513247	0.45	0.264	0.062	0.392	0.14	0.644	0.18	0.26	0.147	0.069	0.155	0.383	0.067	0.123
cg05258935	0.951	0.956	0.952	0.95	0.96	0.936	0.166	0.025	0.007	0.171	0.007	0.953	0.008	0.009
cg04667114	0.818	0.805	0.155	0.542	0.282	0.79	0.188	0.124	0.409	0.601	0.101	0.677	0.471	0.115
cg19222784	0.783	0.182	0.537	0.679	0.513	0.799	0.341	0.259	0.508	0.091	0.367	0.631	0.032	0.095
cg20949700	0.883	0.813	0.866	0.861	0.852	0.886	0.535	0.449	0.854	0.213	0.464	0.842	0.042	0.116
cg08433504	0.844	0.821	0.838	0.756	0.769	0.846	0.223	0.193	0.099	0.052	0.034	0.746	0.034	0.028
cg10078511	0.697	0.652	0.605	0.609	0.585	0.692	0.203	0.123	0.099	0.073	0.102	0.608	0.081	0.058
cg24082121	0.582	0.552	0.244	0.31	0.325	0.556	0.124	0.11	0.204	0.213	0.044	0.404	0.62	0.041
cg08433504	0.844	0.821	0.838	0.756	0.769	0.846	0.223	0.193	0.099	0.052	0.034	0.746	0.034	0.028
cg10078511	0.697	0.652	0.605	0.609	0.585	0.692	0.203	0.123	0.099	0.073	0.102	0.608	0.081	0.058
cg10513118	0.844	0.782	0.69	0.781	0.712	0.828	0.269	0.178	0.056	0.125	0.127	0.712	0.074	0.104
cg08662757	0.029	0.516	0.031	0.012	0.019	0.016	0.01	0.167	0.076	0.049	0.058	0.197	0.015	0.036
cg25753024	0.04	0.501	0.047	0.043	0.036	0.046	0.045	0.226	0.116	0.081	0.07	0.148	0.04	0.056
cg14317609	0.029	0.846	0.059	0.043	0.116	0.031	0.024	0.511	0.048	0.78	0.01	0.205	0.02	0.106
cg06671450	0.13	0.382	0.158	0.124	0.175	0.119	0.091	0.253	0.181	0.379	0.146	0.241	0.131	0.186
cg22079161	0.09	0.42	0.085	0.078	0.135	0.064	0.044	0.164	0.012	0.074	0.023	0.193	0.01	0.028
cg11199770	0.009	0.146	0.009	0.008	0.006	0.007	0.002	0.096	0.002	0.047	0	0.158	0.011	0.012
cg05289892	0.078	0.566	0.081	0.071	0.062	0.062	0.1	0.234	0.042	0.117	0.057	0.321	0.094	0.122
cg19101326	0.01	0.099	0.011	0.009	0.028	0.003	0.001	0.03	0.006	0.022	0.007	0.124	0.005	0.002
cg17154315	0.08	0.234	0.098	0.09	0.16	0.072	0.095	0.258	0.013	0.048	0.024	0.239	0.103	0.116
cg13650938	0.023	0.408	0.166	0.117	0.195	0.019	0.028	0.101	0.167	0.028	0.038	0.134	0.021	0.029
cg12535280	0.048	0.301	0.078	0.075	0.155	0.022	0.019	0.114	0.01	0.047	0.035	0.215	0.015	0.005
cg13920435	0.036	0.272	0.036	0.032	0.025	0.026	0.06	0.126	0.009	0.042	0.031	0.28	0.036	0.035
cg10165847	0.012	0.152	0.02	0.014	0.04	0.008	0.023	0.01	0.004	0.042	0.005	0.247	0.007	0.005
cg21918126	0.011	0.151	0.039	0.017	0.109	0.009	0.006	0.08	0.008	0.047	0.007	0.095	0.005	0.005
cg24634420	0.011	0.156	0.019	0.015	0.061	0.004	0.008	0.065	0.007	0.034	0.003	0.216	0.009	0.005
cg20937139	0.051	0.179	0.075	0.054	0.125	0.044	0.051	0.105	0.046	0.067	0.068	0.255	0.066	0.057
cg19867649	0.013	0.148	0.013	0.014	0.016	0.008	0.018	0.058	0.008	0.049	0.007	0.199	0.017	0.015
cg12585966	0.007	0.305	0.17	0.083	0.214	0.012	0.034	0.081	0.009	0.138	0.014	0.123	0.006	0.012
cg10964367	0.018	0.178	0.03	0.021	0.094	0.009	0.016	0.093	0.028	0.044	0.014	0.131	0.022	0.012
cg20536983	0.059	0.26	0.063	0.065	0.106	0.066	0.068	0.158	0.039	0.069	0.05	0.317	0.064	0.048
cg03304380	0.025	0.2	0.016	0.017	0.043	0.007	0.028	0.062	0.013	0.038	0.011	0.327	0.004	0.01
cg01956420	0.022	0.19	0.026	0.011	0.075	0.004	0.009	0.069	0.004	0.042	0.005	0.281	0.013	0.008
cg20327444	0.015	0.077	0.021	0.025	0.033	0.007	0.008	0.111	0.008	0.041	0.008	0.077	0.005	0.008
cg17541528	0.011	0.118	0.025	0.015	0.041	0.007	0.015	0.03	0.014	0.042	0.003	0.154	0.012	0.007
cg23001131	0.008	0.095	0.011	0.005	0.016	0.003	0.01	0.054	0.008	0.034	0.002	0.132	0.003	0.003
cg15070718	0.014	0.113	0.045	0.023	0.086	0.011	0.016	0.067	0.005	0.04	0.006	0.029	0	0.01
cg05803631	0.012	0.111	0.012	0.012	0.016	0.027	0.015	0.069	0.014	0.039	0.006	0.106	0.006	0.013
cg01444397	0.013	0.121	0.018	0.02	0.025	0.019	0.016	0.08	0.011	0.05	0.017	0.13	0.018	0.026
cg01956420	0.022	0.19	0.026	0.011	0.075	0.004	0.009	0.069	0.004	0.042	0.005	0.281	0.013	0.008
cg20327444	0.015	0.077	0.021	0.025	0.033	0.007	0.008	0.111	0.008	0.041	0.008	0.077	0.005	0.008
cg17541528	0.011	0.118	0.025	0.015	0.041	0.007	0.015	0.03	0.014	0.042	0.003	0.154	0.012	0.007
cg01552272	0.067	0.3	0.189	0.106	0.314	0.04	0.041	0.019	0.006	0.091	0.009	0.234	0.018	0.015
cg04624110	0.103	0.36	0.276	0.124	0.369	0.052	0.06	0.039	0.007	0.12	0.008	0.276	0.025	0.016
cg23169957	0.074	0.316	0.204	0.108	0.326	0.049	0.055	0.2	0.038	0.132	0.032	0.266	0.03	0.025
cg25557432	0.031	0.226	0.093	0.042	0.201	0.016	0.019	0.094	0.004	0.048	0.004	0.219	0	0.012
cg04716990	0.022	0.202	0.063	0.028	0.162	0.011	0.013	0.123	0.004	0.048	0.004	0.174	0.013	0.008
cg26059153	0.015	0.155	0.059	0.017	0.115	0.008	0.018	0.08	0.002	0.041	0.001	0.127	0.005	0.005
cg06571075	0.016	0.162	0.031	0.021	0.116	0.007	0.012	0.058	0.02	0.044	0.006	0.177	0.004	0.004
cg26059153	0.015	0.155	0.059	0.017	0.115	0.008	0.018	0.08	0.002	0.041	0.001	0.127	0.005	0.005
cg06571075	0.016	0.162	0.031	0.021	0.116	0.007	0.012	0.058	0.02	0.044	0.006	0.177	0.004	0.004
cg18932726	0.021	0.217	0.029	0.037	0.16	0.007	0.019	0.177	0.004	0.049	0	0.166	0.012	0.008
cg05608777	0.015	0.146	0.023	0.025	0.087	0.009	0.013	0.145	0.01	0.042	0	0.123	0.009	0.007
cg14344261	0.024	0.41	0.021	0.011	0.016	0.009	0.019	0.165	0.017	0.832	0.006	0.124	0.01	0.056
cg13910860	0.06	0.312	0.059	0.053	0.057	0.056	0.066	0.105	0.029	0.372	0.04	0.157	0.065	0.109
cg07779120	0.012	0.144	0.021	0.008	0.02	0.011	0.012	0.083	0.005	0.035	0.015	0.226	0.005	0.011
cg05446424	0.018	0.168	0.04	0.02	0.086	0.015	0.043	0.061	0.01	0.078	0.007	0.171	0.006	0.022
cg20720059	0.012	0.156	0.029	0.017	0.072	0.007	0.027	0.041	0.019	0.056	0.017	0.189	0	0.021
cg21117668	0.034	0.146	0.037	0.029	0.048	0.024	0.016	0.095	0.018	0.04	0.005	0.1	0.007	0.021
cg23919479	0.014	0.178	0.052	0.022	0.151	0.013	0.017	0.079	0.005	0.032	0.004	0.161	0.025	0.009
cg18778433	0.037	0.232	0.048	0.046	0.093	0.018	0.026	0.147	0.006	0.04	0.014	0.25	0.022	0.019
cg06621094	0.008	0.114	0.011	0.006	0.021	0.005	0.005	0.065	0.002	0.051	0.002	0.194	0.006	0.003
cg01552272	0.067	0.3	0.189	0.106	0.314	0.04	0.041	0.019	0.006	0.091	0.009	0.234	0.018	0.015
cg04624110	0.103	0.36	0.276	0.124	0.369	0.052	0.06	0.039	0.007	0.12	0.008	0.276	0.025	0.016
cg23169957	0.074	0.316	0.204	0.108	0.326	0.049	0.055	0.2	0.038	0.132	0.032	0.266	0.03	0.025
cg25557432	0.031	0.226	0.093	0.042	0.201	0.016	0.019	0.094	0.004	0.048	0.004	0.219	0	0.012
cg04716990	0.022	0.202	0.063	0.028	0.162	0.011	0.013	0.123	0.004	0.048	0.004	0.174	0.013	0.008
cg06571075	0.016	0.162	0.031	0.021	0.116	0.007	0.012	0.058	0.02	0.044	0.006	0.177	0.004	0.004
cg24822696	0.013	0.13	0.021	0.014	0.059	0.007	0.012	0.062	0.011	0.044	0.017	0.147	0.021	0.007
cg10079740	0.011	0.13	0.018	0.009	0.043	0.005	0.011	0.081	0.006	0.046	0.007	0.194	0.004	0.005
cg22950163	0.094	0.179	0.13	0.095	0.145	0.086	0.088	0.146	0.084	0.122	0.097	0.214	0.12	0.108
cg14252519	0.019	0.167	0.023	0.016	0.06	0.01	0.023	0.128	0.016	0.048	0.011	0.166	0.007	0.038
cg15617814	0.022	0.216	0.051	0.033	0.121	0.017	0.029	0.197	0.013	0.064	0.018	0.133	0.007	0.023
cg14416311	0.02	0.146	0.03	0.01	0.035	0.009	0.012	0.086	0.032	0.04	0.02	0.189	0.004	0.008
cg04925858	0.067	0.265	0.036	0.077	0.036	0.086	0.055	0.116	0.033	0.064	0.05	0.157	0.043	0.083
cg01686920	0.015	0.144	0.032	0.025	0.043	0.012	0.008	0.075	0.035	0.045	0.022	0.146	0.027	0.009
cg08384637	0.016	0.107	0.036	0.015	0.052	0.014	0.016	0.057	0.006	0.035	0.003	0.095	0.012	0.012
cg05446424	0.018	0.168	0.04	0.02	0.086	0.015	0.043	0.061	0.01	0.078	0.007	0.171	0.006	0.022
cg20720059	0.012	0.156	0.029	0.017	0.072	0.007	0.027	0.041	0.019	0.056	0.017	0.189	0	0.021
cg14629075	0.013	0.09	0.02	0.011	0.041	0.007	0.008	0.038	0.003	0.045	0.004	0.107	0.002	0.01
cg22664296	0.008	0.12	0.011	0.007	0.04	0.005	0.019	0.045	0.008	0.031	0.008	0.201	0.003	0.029
cg01552272	0.067	0.3	0.189	0.106	0.314	0.04	0.041	0.019	0.006	0.091	0.009	0.234	0.018	0.015
cg04624110	0.103	0.36	0.276	0.124	0.369	0.052	0.06	0.039	0.007	0.12	0.008	0.276	0.025	0.016
cg23169957	0.074	0.316	0.204	0.108	0.326	0.049	0.055	0.2	0.038	0.132	0.032	0.266	0.03	0.025
cg25557432	0.031	0.226	0.093	0.042	0.201	0.016	0.019	0.094	0.004	0.048	0.004	0.219	0	0.012
cg04716990	0.022	0.202	0.063	0.028	0.162	0.011	0.013	0.123	0.004	0.048	0.004	0.174	0.013	0.008
cg06571075	0.016	0.162	0.031	0.021	0.116	0.007	0.012	0.058	0.02	0.044	0.006	0.177	0.004	0.004
cg18932726	0.021	0.217	0.029	0.037	0.16	0.007	0.019	0.177	0.004	0.049	0	0.166	0.012	0.008
cg05608777	0.015	0.146	0.023	0.025	0.087	0.009	0.013	0.145	0.01	0.042	0	0.123	0.009	0.007
cg23344321	0.058	0.438	0.225	0.069	0.198	0.056	0.083	0.153	0.051	0.203	0.061	0.143	0.151	0.067
cg13561592	0.007	0.094	0.015	0.008	0.052	0.002	0.018	0.055	0.023	0.036	0.011	0.095	0	0.004
cg03735496	0.034	0.231	0.053	0.025	0.083	0.021	0.023	0.183	0.006	0.028	0.004	0.322	0.011	0.014
cg01777403	0.029	0.118	0.03	0.01	0.035	0.039	0.004	0.065	0.002	0.033	0.019	0.129	0.014	0.004
cg25984344	0.02	0.21	0.065	0.029	0.199	0.009	0.031	0.13	0.015	0.108	0.003	0.189	0.007	0.007
cg12204732	0.023	0.229	0.062	0.031	0.192	0.007	0.02	0.081	0.007	0.141	0.009	0.205	0.017	0.01
cg03070297	0.022	0.2	0.045	0.023	0.131	0.02	0.032	0.084	0.018	0.104	0.012	0.171	0.029	0.019
cg03129384	0.075	0.257	0.136	0.086	0.238	0.055	0.086	0.107	0.065	0.129	0.068	0.229	0.057	0.071
cg13798146	0.013	0.106	0.032	0.009	0.036	0.011	0.01	0.055	0.004	0.032	0.004	0.141	0.019	0.007
cg05673756	0.029	0.161	0.055	0.029	0.08	0.016	0.023	0.077	0.008	0.047	0.01	0.18	0.007	0.008
cg25984344	0.02	0.21	0.065	0.029	0.199	0.009	0.031	0.13	0.015	0.108	0.003	0.189	0.007	0.007
cg12204732	0.023	0.229	0.062	0.031	0.192	0.007	0.02	0.081	0.007	0.141	0.009	0.205	0.017	0.01
cg03070297	0.022	0.2	0.045	0.023	0.131	0.02	0.032	0.084	0.018	0.104	0.012	0.171	0.029	0.019
cg03129384	0.075	0.257	0.136	0.086	0.238	0.055	0.086	0.107	0.065	0.129	0.068	0.229	0.057	0.071
cg14557714	0.015	0.131	0.016	0.015	0.029	0.009	0.015	0.083	0.004	0.026	0.011	0.213	0.01	0.022
cg27100990	0.018	0.163	0.034	0.034	0.091	0.011	0.02	0.086	0.011	0.057	0.019	0.182	0.015	0.01
cg00421139	0.011	0.107	0.024	0.016	0.05	0.01	0.011	0.06	0.014	0.041	0.009	0.128	0.006	0.004
cg13632816	0.019	0.183	0.053	0.032	0.127	0.011	0.018	0.076	0.008	0.054	0.03	0.217	0.009	0.007
cg17266282	0.03	0.93	0.043	0.109	0.132	0.029	0.197	0.146	0.504	0.11	0.542	0.238	0.913	0.366
cg09083627	0.01	0.097	0.019	0.014	0.047	0.012	0.02	0.064	0.008	0.064	0.013	0.132	0.017	0.017
cg15778745	0.011	0.136	0.021	0.011	0.077	0.004	0.014	0.137	0.014	0.063	0	0.127	0.003	0.008
cg12894649	0.025	0.2	0.065	0.053	0.239	0.011	0.029	0.104	0.005	0.043	0.01	0.172	0.02	0.011
cg23944804	0.018	0.205	0.061	0.042	0.281	0.01	0.026	0.106	0.002	0.032	0.002	0.186	0.011	0.006
cg14603345	0.021	0.233	0.081	0.056	0.296	0.01	0.039	0.093	0.002	0.029	0	0.195	0.014	0.009
cg27593384	0.011	0.098	0.022	0.01	0.05	0.008	0.008	0.058	0.002	0.034	0	0.132	0.013	0.007
cg15698842	0.09	0.18	0.126	0.09	0.171	0.08	0.119	0.138	0.075	0.11	0.106	0.214	0.072	0.093
cg01244944	0.09	0.26	0.113	0.098	0.173	0.101	0.101	0.189	0.068	0.145	0.059	0.215	0.096	0.091
cg27475132	0.023	0.201	0.054	0.026	0.14	0.011	0.045	0.138	0.004	0.065	0.007	0.185	0.019	0.014
cg24410535	0.065	0.2	0.099	0.068	0.156	0.059	0.078	0.09	0.067	0.243	0.08	0.194	0.073	0.076
cg14102128	0.051	0.2	0.065	0.039	0.097	0.033	0.015	0.114	0.021	0.036	0.01	0.232	0	0.016
cg14781189	0.045	0.434	0.275	0.084	0.361	0.035	0.02	0.103	0.002	0.503	0	0.15	0.003	0.006
cg06659727	0.024	0.161	0.055	0.022	0.107	0.014	0.022	0.07	0.041	0.033	0.021	0.162	0.01	0.007
cg24610274	0.009	0.113	0.035	0.031	0.07	0.004	0.024	0.097	0.006	0.054	0.018	0.031	0	0.033
cg07910813	0.006	0.089	0.009	0.012	0.022	0.006	0.012	0.098	0.002	0.044	0.007	0.084	0.013	0.01
cg13974632	0.04	0.318	0.157	0.076	0.32	0.021	0.053	0.141	0.018	0.044	0.022	0.251	0.011	0.011
cg27600205	0.009	0.138	0.023	0.014	0.077	0.006	0.023	0.147	0.003	0.051	0	0.111	0.029	0.013
cg10524033	0.074	0.176	0.086	0.066	0.107	0.056	0.063	0.111	0.058	0.066	0.052	0.196	0.088	0.058
cg14400886	0.066	0.175	0.089	0.07	0.113	0.057	0.074	0.119	0.056	0.088	0.047	0.174	0.079	0.061
cg01408654	0.038	0.18	0.05	0.041	0.1	0.023	0.045	0.102	0.042	0.075	0.043	0.178	0.041	0.026
cg02458065	0.023	0.207	0.093	0.026	0.159	0.013	0.024	0.052	0.002	0.092	0.007	0.249	0.012	0.006
cg05803631	0.012	0.111	0.012	0.012	0.016	0.027	0.015	0.069	0.014	0.039	0.006	0.106	0.006	0.013
cg01444397	0.013	0.121	0.018	0.02	0.025	0.019	0.016	0.08	0.011	0.05	0.017	0.13	0.018	0.026
cg09156233	0.011	0.111	0.022	0.013	0.045	0.008	0.02	0.043	0.003	0.036	0.003	0.196	0.006	0.008
cg12161228	0.028	0.304	0.1	0.062	0.236	0.012	0.055	0.156	0.018	0.043	0.012	0.305	0.014	0.089
cg24333845	0.036	0.354	0.048	0.04	0.043	0.037	0.078	0.09	0.031	0.356	0.036	0.05	0.416	0.061
cg22375192	0.009	0.107	0.014	0.016	0.021	0.01	0.022	0.068	0.02	0.044	0.01	0.142	0.008	0.015
cg26982544	0.038	0.278	0.148	0.04	0.193	0.038	0.056	0.06	0.044	0.068	0.045	0.165	0.09	0.056
cg05602862	0.025	0.257	0.097	0.045	0.213	0.017	0.037	0.104	0.006	0.194	0.006	0.17	0.036	0.017
cg05733135	0.041	0.263	0.146	0.07	0.242	0.031	0.027	0.152	0.01	0.044	0.01	0.195	0.012	0.008
cg05502701	0.031	0.183	0.084	0.04	0.176	0.022	0.022	0.094	0.004	0.164	0.008	0.119	0.003	0.004
cg24353443	0.022	0.254	0.119	0.048	0.265	0.025	0.03	0.105	0.029	0.178	0.014	0.115	0.003	0.001
cg10111115	0.161	0.315	0.26	0.177	0.326	0.153	0.112	0.129	0.092	0.215	0.094	0.265	0.108	0.095
cg14473924	0.157	0.406	0.325	0.203	0.431	0.154	0.118	0.145	0.077	0.253	0.102	0.299	0.054	0.056
cg20710394	0.014	0.109	0.019	0.015	0.015	0.017	0.018	0.075	0.004	0.043	0.006	0.138	0.03	0.016
cg05491001	0.054	0.31	0.085	0.061	0.219	0.025	0.022	0.038	0.022	0.288	0.016	0.302	0.023	0.015
cg06906472	0.027	0.255	0.034	0.037	0.127	0.007	0.01	0.151	0.004	0.234	0.002	0.325	0	0.006
cg22285621	0.09	0.475	0.114	0.079	0.112	0.072	0.103	0.131	0.238	0.116	0.134	0.315	0.078	0.227
cg06433879	0.014	0.135	0.06	0.018	0.079	0.014	0.024	0.071	0.006	0.047	0.008	0.147	0.015	0.012
cg12894649	0.025	0.2	0.065	0.053	0.239	0.011	0.029	0.104	0.005	0.043	0.01	0.172	0.02	0.011
cg23944804	0.018	0.205	0.061	0.042	0.281	0.01	0.026	0.106	0.002	0.032	0.002	0.186	0.011	0.006
cg14603345	0.021	0.233	0.081	0.056	0.296	0.01	0.039	0.093	0.002	0.029	0	0.195	0.014	0.009
cg01787285	0.161	0.401	0.038	0.06	0.092	0.209	0.044	0.077	0.021	0.14	0.116	0.136	0.374	0.063
cg03345093	0.025	0.166	0.028	0.035	0.041	0.019	0.023	0.224	0.019	0.072	0.023	0.11	0	0.018
cg01552272	0.067	0.3	0.189	0.106	0.314	0.04	0.041	0.019	0.006	0.091	0.009	0.234	0.018	0.015
cg04624110	0.103	0.36	0.276	0.124	0.369	0.052	0.06	0.039	0.007	0.12	0.008	0.276	0.025	0.016
cg23169957	0.074	0.316	0.204	0.108	0.326	0.049	0.055	0.2	0.038	0.132	0.032	0.266	0.03	0.025
cg25557432	0.031	0.226	0.093	0.042	0.201	0.016	0.019	0.094	0.004	0.048	0.004	0.219	0	0.012
cg04716990	0.022	0.202	0.063	0.028	0.162	0.011	0.013	0.123	0.004	0.048	0.004	0.174	0.013	0.008
cg06571075	0.016	0.162	0.031	0.021	0.116	0.007	0.012	0.058	0.02	0.044	0.006	0.177	0.004	0.004
cg14051544	0.031	0.25	0.109	0.042	0.178	0.015	0.029	0.083	0.006	0.18	0.002	0.267	0.009	0.008
cg20478129	0.013	0.167	0.034	0.037	0.143	0.009	0.03	0.076	0.006	0.033	0.004	0.236	0.011	0.008
cg16248329	0.018	0.227	0.029	0.038	0.157	0.004	0.021	0.107	0.018	0.318	0	0.156	0.003	0.002
cg16418810	0.015	0.144	0.02	0.011	0.054	0.01	0.026	0.107	0.009	0.058	0.014	0.2	0.015	0.018
cg25984344	0.02	0.21	0.065	0.029	0.199	0.009	0.031	0.13	0.015	0.108	0.003	0.189	0.007	0.007
cg12204732	0.023	0.229	0.062	0.031	0.192	0.007	0.02	0.081	0.007	0.141	0.009	0.205	0.017	0.01
cg03070297	0.022	0.2	0.045	0.023	0.131	0.02	0.032	0.084	0.018	0.104	0.012	0.171	0.029	0.019
cg03129384	0.075	0.257	0.136	0.086	0.238	0.055	0.086	0.107	0.065	0.129	0.068	0.229	0.057	0.071
cg10276227	0.02	0.204	0.047	0.022	0.065	0.015	0.024	0.093	0.014	0.094	0.013	0.33	0.029	0.021
cg10364182	0.048	0.361	0.267	0.095	0.294	0.037	0.085	0.117	0.053	0.099	0.068	0.161	0.032	0.043
cg26821327	0.045	0.266	0.176	0.077	0.2	0.042	0.056	0.122	0.041	0.078	0.062	0.116	0.042	0.059
cg03793270	0.096	0.443	0.245	0.108	0.369	0.059	0.036	0.15	0.038	0.252	0.013	0.273	0.013	0.066
cg05403555	0.022	0.149	0.062	0.034	0.125	0.015	0.01	0.084	0.005	0.058	0.002	0.14	0.012	0.01
cg12708634	0.041	0.189	0.087	0.049	0.134	0.031	0.062	0.158	0.009	0.115	0.02	0.225	0.021	0.042
cg27549952	0.024	0.194	0.087	0.05	0.141	0.021	0.038	0.106	0.022	0.057	0.029	0.143	0.018	0.02
cg09159285	0.208	0.725	0.363	0.506	0.345	0.269	0.034	0.094	0.452	0.086	0.044	0.347	0.018	0.056
cg27539986	0.331	0.701	0.429	0.607	0.403	0.366	0.082	0.183	0.333	0.104	0.045	0.4	0.049	0.098
cg24531022	0.005	0.037	0.249	0.01	0.054	0.007	0.034	0.115	0.006	0.041	0.009	0.156	0.018	0.011
cg02983950	0.014	0.047	0.353	0.021	0.175	0.009	0.027	0.111	0.046	0.099	0.021	0.161	0.001	0.004
cg14612335	0.019	0.026	0.406	0.076	0.35	0.021	0.037	0.048	0.025	0.08	0.035	0.063	0.042	0.043
cg11006267	0.004	0.007	0.286	0.012	0.193	0.006	0.049	0.054	0.135	0.034	0.061	0.091	0.001	0.013
cg18213545	0.028	0.14	0.52	0.159	0.596	0.033	0.039	0.073	0.07	0.064	0.09	0.158	0.025	0.037
cg10831212	0.023	0.217	0.805	0.376	0.815	0.028	0.04	0.022	0.051	0.082	0.068	0.212	0	0.02
cg19210276	0.048	0.22	0.761	0.237	0.793	0.049	0.105	0.143	0.039	0.116	0.011	0.192	0.056	0.037
cg05164926	0.015	0.062	0.503	0.059	0.418	0.062	0.075	0.072	0.225	0.041	0.052	0.163	0	0.003
cg12034678	0.002	0.004	0.208	0.014	0.342	0.006	0.011	0.048	0.009	0.039	0.003	0.044	0	0.001
cg22707529	0.036	0.052	0.423	0.089	0.39	0.034	0.053	0.074	0.022	0.076	0.033	0.164	0.041	0.041
cg20865323	0.031	0.032	0.278	0.051	0.255	0.028	0.036	0.059	0.019	0.065	0.028	0.103	0.033	0.035
cg12446199	0.025	0.024	0.627	0.453	0.643	0.028	0.053	0.07	0.008	0.144	0.012	0.129	0.026	0.047
cg17949727	0.008	0.021	0.231	0.017	0.197	0.01	0.031	0.075	0.057	0.108	0.024	0.049	0.007	0.014
cg10784030	0.055	0.065	0.197	0.058	0.194	0.059	0.072	0.111	0.091	0.133	0.059	0.093	0.065	0.061
cg05749969	0.062	0.082	0.387	0.076	0.342	0.067	0.077	0.099	0.1	0.159	0.075	0.145	0.08	0.069
cg10831212	0.023	0.217	0.805	0.376	0.815	0.028	0.04	0.022	0.051	0.082	0.068	0.212	0	0.02
cg19210276	0.048	0.22	0.761	0.237	0.793	0.049	0.105	0.143	0.039	0.116	0.011	0.192	0.056	0.037
cg21344746	0.012	0.045	0.386	0.098	0.467	0.014	0.022	0.08	0.12	0.051	0.01	0.116	0.016	0.008
cg24679890	0.017	0.025	0.54	0.062	0.494	0.04	0.074	0.079	0.354	0.047	0.032	0.237	0.018	0.02
cg15473346	0.007	0.021	0.435	0.397	0.372	0.008	0.04	0.15	0.017	0.061	0.088	0.039	0.008	0.002
cg06121450	0.055	0.062	0.265	0.232	0.234	0.054	0.069	0.087	0.052	0.089	0.142	0.139	0.083	0.068
cg22707529	0.036	0.052	0.423	0.089	0.39	0.034	0.053	0.074	0.022	0.076	0.033	0.164	0.041	0.041
cg20865323	0.031	0.032	0.278	0.051	0.255	0.028	0.036	0.059	0.019	0.065	0.028	0.103	0.033	0.035
cg03835987	0.035	0.073	0.57	0.141	0.589	0.042	0.117	0.068	0.025	0.189	0.029	0.227	0.045	0.056
cg21272996	0.056	0.3	0.827	0.471	0.833	0.052	0.082	0.117	0.05	0.095	0.044	0.218	0.041	0.036
cg05388840	0.008	0.049	0.421	0.084	0.487	0.02	0.089	0.061	0.103	0.041	0.058	0.205	0.01	0.006
cg10640944	0.03	0.048	0.221	0.028	0.078	0.029	0.027	0.116	0.018	0.05	0.014	0.154	0.026	0.027
cg02501827	0.014	0.181	0.701	0.152	0.707	0.017	0.057	0.229	0.058	0.322	0.022	0.205	0.011	0.064
cg12492653	0.132	0.324	0.73	0.372	0.755	0.118	0.244	0.311	0.211	0.441	0.209	0.211	0.14	0.186
cg18213545	0.028	0.14	0.52	0.159	0.596	0.033	0.039	0.073	0.07	0.064	0.09	0.158	0.025	0.037
cg10831212	0.023	0.217	0.805	0.376	0.815	0.028	0.04	0.022	0.051	0.082	0.068	0.212	0	0.02
cg12917475	0.044	0.06	0.335	0.058	0.336	0.046	0.058	0.059	0.049	0.089	0.063	0.123	0.057	0.061
cg05877109	0.044	0.05	0.346	0.058	0.346	0.043	0.061	0.056	0.037	0.079	0.028	0.114	0.052	0.04
cg25149155	0.085	0.104	0.386	0.105	0.391	0.082	0.111	0.116	0.072	0.136	0.078	0.145	0.11	0.106
cg04542489	0.025	0.051	0.214	0.043	0.216	0.028	0.04	0.055	0.028	0.086	0.077	0.053	0.05	0.041
cg09878888	0.04	0.193	0.547	0.185	0.597	0.04	0.085	0.061	0.031	0.07	0.031	0.218	0.044	0.039
cg09431416	0.016	0.074	0.384	0.068	0.467	0.019	0.075	0.096	0.025	0.111	0.007	0.055	0.101	0.034
cg12459718	0.071	0.155	0.552	0.326	0.585	0.077	0.055	0.087	0.012	0.06	0.021	0.136	0.053	0.02
cg10040748	0.035	0.046	0.397	0.158	0.353	0.038	0.055	0.059	0.033	0.083	0.052	0.146	0.064	0.076
cg15232539	0.043	0.221	0.689	0.064	0.448	0.054	0.11	0.164	0.015	0.769	0.013	0.128	0.025	0.024
cg17983217	0.031	0.053	0.445	0.038	0.198	0.034	0.054	0.183	0.146	0.782	0.043	0.102	0.061	0.091
cg00124375	0.007	0.038	0.571	0.029	0.301	0.012	0.038	0.165	0.153	0.807	0.034	0.144	0.002	0.013
cg17329494	0.022	0.143	0.45	0.164	0.502	0.023	0.06	0.095	0.011	0.135	0.009	0.179	0.018	0.022
cg17679824	0.005	0.031	0.085	0.018	0.131	0.006	0.022	0.126	0.015	0.094	0.01	0.005	0.015	0.011
cg12666727	0.02	0.017	0.419	0.26	0.406	0.021	0.108	0.089	0.053	0.054	0.078	0.15	0.015	0.021
cg23051349	0.021	0.114	0.654	0.219	0.697	0.043	0.07	0.086	0.27	0.042	0.038	0.189	0.026	0.217
cg09545443	0.038	0.057	0.366	0.094	0.341	0.037	0.11	0.078	0.023	0.091	0.023	0.079	0.109	0.064
cg18609578	0.04	0.092	0.391	0.078	0.32	0.047	0.079	0.188	0.031	0.089	0.032	0.125	0.057	0.058
cg14214239	0.066	0.086	0.135	0.071	0.113	0.069	0.071	0.173	0.025	0.091	0.099	0.135	0.074	0.093
cg03997390	0.06	0.084	0.249	0.074	0.215	0.056	0.071	0.123	0.052	0.126	0.077	0.126	0.078	0.057
cg14825976	0.127	0.149	0.593	0.16	0.591	0.15	0.073	0.077	0.062	0.327	0.044	0.228	0.088	0.062
cg22454011	0.17	0.177	0.645	0.17	0.621	0.199	0.114	0.121	0.062	0.502	0.046	0.178	0.159	0.064
cg25374649	0.073	0.09	0.535	0.101	0.53	0.093	0.074	0.086	0.058	0.276	0.052	0.159	0.077	0.049
cg23600866	0.049	0.155	0.383	0.134	0.356	0.051	0.041	0.097	0.019	0.079	0.041	0.142	0.042	0.024
cg24542714	0.051	0.144	0.546	0.298	0.504	0.06	0.065	0.078	0.042	0.178	0.026	0.201	0.035	0.073
cg15846482	0.059	0.162	0.484	0.113	0.62	0.066	0.063	0.071	0.039	0.063	0.042	0.173	0.046	0.04
cg03717364	0.026	0.167	0.507	0.137	0.515	0.03	0.102	0.053	0.112	0.438	0.01	0.286	0.027	0.019
cg04011671	0.018	0.108	0.463	0.08	0.46	0.023	0.052	0.077	0.068	0.389	0.011	0.164	0.029	0.016
cg10683341	0.021	0.037	0.242	0.046	0.245	0.028	0.042	0.097	0.013	0.063	0.022	0.129	0.021	0.021
cg23651614	0.04	0.046	0.235	0.084	0.235	0.039	0.055	0.068	0.037	0.074	0.041	0.099	0.044	0.051
cg08388111	0.029	0.042	0.239	0.04	0.198	0.037	0.054	0.048	0.014	0.073	0.026	0.111	0.092	0.085
cg10423113	0.012	0.018	0.127	0.021	0.096	0.017	0.007	0.062	0.017	0.05	0.031	0.045	0.022	0.016
cg10409248	0.003	0.029	0.124	0.009	0.102	0.004	0.007	0.072	0.065	0.029	0.014	0.056	0.004	0.009
cg25840538	0.052	0.21	0.564	0.159	0.583	0.07	0.111	0.116	0.06	0.103	0.055	0.198	0.061	0.065
cg12917475	0.044	0.06	0.335	0.058	0.336	0.046	0.058	0.059	0.049	0.089	0.063	0.123	0.057	0.061
cg05877109	0.044	0.05	0.346	0.058	0.346	0.043	0.061	0.056	0.037	0.079	0.028	0.114	0.052	0.04
cg25149155	0.085	0.104	0.386	0.105	0.391	0.082	0.111	0.116	0.072	0.136	0.078	0.145	0.11	0.106
cg04542489	0.025	0.051	0.214	0.043	0.216	0.028	0.04	0.055	0.028	0.086	0.077	0.053	0.05	0.041
cg00744866	0.058	0.215	0.6	0.137	0.545	0.081	0.07	0.148	0.032	0.41	0.059	0.17	0.021	0.031
cg18049167	0.209	0.426	0.713	0.284	0.743	0.227	0.061	0.144	0.036	0.24	0.018	0.197	0.014	0.018
cg17329164	0.12	0.267	0.502	0.169	0.548	0.12	0.031	0.11	0.019	0.14	0.026	0.1	0.006	0.01
cg05133205	0.401	0.558	0.782	0.414	0.775	0.421	0.105	0.141	0.019	0.285	0.063	0.331	0	0.021
cg14130039	0.196	0.312	0.432	0.221	0.421	0.196	0.102	0.085	0.045	0.215	0.098	0.25	0.05	0.056
cg26196531	0.103	0.271	0.607	0.294	0.612	0.105	0.094	0.182	0.12	0.152	0.272	0.236	0.108	0.099
cg00615377	0.063	0.222	0.577	0.223	0.556	0.058	0.058	0.129	0.062	0.104	0.201	0.157	0.033	0.048
cg25365958	0.092	0.151	0.659	0.222	0.751	0.105	0.09	0.138	0.185	0.079	0.069	0.245	0.032	0.043
cg23094674	0.101	0.175	0.344	0.157	0.301	0.101	0.281	0.185	0.097	0.347	0.106	0.242	0.221	0.189
cg24864241	0.073	0.114	0.539	0.202	0.439	0.073	0.173	0.105	0.038	0.239	0.048	0.169	0.078	0.056
cg11911122	0.032	0.044	0.371	0.057	0.385	0.033	0.091	0.086	0.031	0.253	0.042	0.117	0.035	0.046
cg00168785	0.05	0.108	0.416	0.099	0.407	0.052	0.061	0.096	0.061	0.076	0.064	0.146	0.063	0.128
cg19409172	0.027	0.051	0.292	0.08	0.291	0.026	0.054	0.13	0.041	0.126	0.025	0.095	0.026	0.021
cg07363543	0.015	0.036	0.513	0.167	0.291	0.018	0.025	0.075	0.598	0.051	0.145	0.203	0.062	0.082
cg05412028	0.051	0.203	0.462	0.182	0.466	0.094	0.032	0.134	0.058	0.092	0.029	0.164	0.07	0.016
cg26685941	0.093	0.224	0.415	0.201	0.377	0.151	0.076	0.148	0.166	0.095	0.104	0.219	0.067	0.042
cg13687825	0.036	0.075	0.095	0.005	0.004	0.004	0.01	0.085	0.011	0.04	0.002	0.028	0.011	0.016
cg15799395	0.034	0.053	0.503	0.136	0.478	0.041	0.083	0.182	0.143	0.183	0.212	0.118	0.039	0.041
cg00336376	0.04	0.076	0.445	0.202	0.433	0.041	0.077	0.078	0.102	0.079	0.062	0.161	0.115	0.089
cg08944236	0.039	0.117	0.531	0.077	0.564	0.052	0.123	0.063	0.043	0.328	0.071	0.267	0.077	0.057
cg05795313	0.041	0.122	0.418	0.184	0.418	0.025	0.046	0.068	0.034	0.147	0.165	0.148	0.037	0.047
cg08388111	0.029	0.042	0.239	0.04	0.198	0.037	0.054	0.048	0.014	0.073	0.026	0.111	0.092	0.085
cg10423113	0.012	0.018	0.127	0.021	0.096	0.017	0.007	0.062	0.017	0.05	0.031	0.045	0.022	0.016
cg18108087	0.035	0.04	0.2	0.042	0.077	0.038	0.043	0.063	0.03	0.066	0.055	0.101	0.051	0.066
cg21161394	0.031	0.072	0.548	0.461	0.551	0.044	0.075	0.093	0.024	0.488	0.017	0.199	0.018	0.052
cg02648847	0.066	0.058	0.689	0.583	0.629	0.072	0.081	0.084	0.082	0.438	0.057	0.17	0.066	0.07
cg15999165	0.053	0.188	0.507	0.115	0.441	0.081	0.104	0.075	0.054	0.073	0.235	0.2	0.072	0.127
cg22580629	0.03	0.053	0.304	0.047	0.382	0.033	0.057	0.08	0.06	0.06	0.077	0.157	0.027	0.033
cg16853842	0.099	0.117	0.213	0.114	0.268	0.111	0.123	0.207	0.061	0.143	0.055	0.206	0.13	0.136
cg14825976	0.127	0.149	0.593	0.16	0.591	0.15	0.073	0.077	0.062	0.327	0.044	0.228	0.088	0.062
cg25374649	0.073	0.09	0.535	0.101	0.53	0.093	0.074	0.086	0.058	0.276	0.052	0.159	0.077	0.049
cg03156769	0.032	0.083	0.264	0.051	0.203	0.035	0.053	0.103	0.051	0.09	0.038	0.089	0.089	0.034
cg06092729	0.044	0.047	0.287	0.058	0.26	0.044	0.056	0.066	0.058	0.097	0.075	0.092	0.079	0.063
cg25729350	0.034	0.074	0.543	0.09	0.397	0.054	0.213	0.066	0.09	0.084	0.12	0.136	0.354	0.26
cg19628988	0.037	0.219	0.875	0.076	0.868	0.064	0.249	0.076	0.072	0.115	0.055	0.141	0.829	0.386
cg14117392	0.078	0.083	0.675	0.152	0.652	0.083	0.122	0.099	0.319	0.079	0.107	0.257	0.166	0.274
cg27557428	0.017	0.181	0.293	0.155	0.263	0.016	0.023	0.081	0.089	0.039	0.029	0.102	0.025	0.055
cg18049167	0.209	0.426	0.713	0.284	0.743	0.227	0.061	0.144	0.036	0.24	0.018	0.197	0.014	0.018
cg17329164	0.12	0.267	0.502	0.169	0.548	0.12	0.031	0.11	0.019	0.14	0.026	0.1	0.006	0.01
cg05133205	0.401	0.558	0.782	0.414	0.775	0.421	0.105	0.141	0.019	0.285	0.063	0.331	0	0.021
cg14130039	0.196	0.312	0.432	0.221	0.421	0.196	0.102	0.085	0.045	0.215	0.098	0.25	0.05	0.056
cg16504019	0.041	0.173	0.383	0.163	0.388	0.043	0.073	0.084	0.063	0.072	0.059	0.133	0.061	0.058
cg14001992	0.065	0.103	0.576	0.166	0.474	0.058	0.128	0.215	0.057	0.518	0.04	0.167	0.085	0.045
cg17949727	0.008	0.021	0.231	0.017	0.197	0.01	0.031	0.075	0.057	0.108	0.024	0.049	0.007	0.014
cg02309273	0.047	0.053	0.283	0.064	0.267	0.046	0.066	0.069	0.081	0.112	0.036	0.126	0.055	0.067
cg10784030	0.055	0.065	0.197	0.058	0.194	0.059	0.072	0.111	0.091	0.133	0.059	0.093	0.065	0.061
cg05749969	0.062	0.082	0.387	0.076	0.342	0.067	0.077	0.099	0.1	0.159	0.075	0.145	0.08	0.069
cg12917475	0.044	0.06	0.335	0.058	0.336	0.046	0.058	0.059	0.049	0.089	0.063	0.123	0.057	0.061
cg05877109	0.044	0.05	0.346	0.058	0.346	0.043	0.061	0.056	0.037	0.079	0.028	0.114	0.052	0.04
cg25149155	0.085	0.104	0.386	0.105	0.391	0.082	0.111	0.116	0.072	0.136	0.078	0.145	0.11	0.106
cg04542489	0.025	0.051	0.214	0.043	0.216	0.028	0.04	0.055	0.028	0.086	0.077	0.053	0.05	0.041
cg22240533	0.046	0.042	0.252	0.048	0.148	0.032	0.068	0.121	0.029	0.209	0.026	0.073	0.039	0.052
cg08903019	0.061	0.185	0.491	0.155	0.611	0.067	0.077	0.085	0.053	0.074	0.071	0.191	0.098	0.094
cg11836119	0.036	0.181	0.353	0.143	0.385	0.028	0.03	0.091	0.011	0.221	0.011	0.101	0.044	0.034
cg13607248	0.04	0.029	0.333	0.131	0.54	0.079	0.025	0.168	0.009	0.092	0.016	0.047	0.056	0.014
cg02046552	0.02	0.102	0.822	0.559	0.631	0.033	0.187	0.572	0.012	0.409	0.064	0.196	0.104	0.204
cg27093546	0.134	0.256	0.57	0.244	0.575	0.137	0.126	0.152	0.364	0.131	0.069	0.226	0.076	0.081
cg07692853	0.057	0.139	0.382	0.1	0.372	0.048	0.051	0.113	0.181	0.124	0.056	0.128	0.035	0.034
cg19933595	0.037	0.075	0.545	0.122	0.236	0.043	0.13	0.121	0.195	0.54	0.096	0.193	0.097	0.167
cg09942999	0.087	0.156	0.55	0.231	0.535	0.07	0.067	0.066	0.23	0.06	0.064	0.227	0.166	0.117
cg16547186	0.044	0.053	0.618	0.126	0.633	0.05	0.138	0.161	0.05	0.393	0.143	0.184	0.194	0.169
cg10421247	0.049	0.228	0.465	0.298	0.479	0.068	0.05	0.098	0.02	0.05	0.036	0.153	0.145	0.089
cg26719831	0.066	0.162	0.588	0.197	0.467	0.078	0.117	0.102	0.39	0.093	0.123	0.235	0.09	0.106
cg03717364	0.026	0.167	0.507	0.137	0.515	0.03	0.102	0.053	0.112	0.438	0.01	0.286	0.027	0.019
cg04011671	0.018	0.108	0.463	0.08	0.46	0.023	0.052	0.077	0.068	0.389	0.011	0.164	0.029	0.016
cg26008365	0.017	0.027	0.635	0.215	0.549	0.027	0.072	0.106	0.715	0.065	0.319	0.226	0.042	0.028
cg25040783	0.051	0.064	0.342	0.136	0.401	0.054	0.072	0.105	0.036	0.092	0.044	0.123	0.071	0.054
cg07330114	0.052	0.168	0.466	0.274	0.484	0.042	0.058	0.128	0.057	0.111	0.056	0.186	0.094	0.064
cg00357551	0.136	0.451	0.793	0.489	0.845	0.151	0.102	0.127	0.058	0.116	0.098	0.339	0.079	0.053
cg12688234	0.281	0.653	0.879	0.711	0.886	0.302	0.148	0.183	0.037	0.129	0.109	0.473	0.03	0.03
cg24124443	0.032	0.245	0.6	0.16	0.621	0.019	0.043	0.194	0.18	0.547	0.012	0.224	0.014	0.012
cg02309273	0.047	0.053	0.283	0.064	0.267	0.046	0.066	0.069	0.081	0.112	0.036	0.126	0.055	0.067
cg05749969	0.062	0.082	0.387	0.076	0.342	0.067	0.077	0.099	0.1	0.159	0.075	0.145	0.08	0.069
cg22366279	0.055	0.079	0.385	0.079	0.388	0.053	0.06	0.099	0.057	0.185	0.058	0.134	0.168	0.069
cg24445316	0.055	0.096	0.389	0.073	0.389	0.055	0.087	0.066	0.233	0.084	0.062	0.192	0.051	0.059
cg21161394	0.031	0.072	0.548	0.461	0.551	0.044	0.075	0.093	0.024	0.488	0.017	0.199	0.018	0.052
cg02648847	0.066	0.058	0.689	0.583	0.629	0.072	0.081	0.084	0.082	0.438	0.057	0.17	0.066	0.07
cg13300623	0.023	0.056	0.184	0.048	0.196	0.023	0.031	0.134	0.031	0.034	0.019	0.082	0.015	0.024
cg11721361	0.045	0.097	0.303	0.089	0.311	0.048	0.085	0.086	0.125	0.083	0.097	0.181	0.057	0.054
cg10683341	0.021	0.037	0.242	0.046	0.245	0.028	0.042	0.097	0.013	0.063	0.022	0.129	0.021	0.021
cg23651614	0.04	0.046	0.235	0.084	0.235	0.039	0.055	0.068	0.037	0.074	0.041	0.099	0.044	0.051
cg22306344	0.006	0.021	0.171	0.02	0.319	0.009	0.026	0.087	0.02	0.062	0.011	0.056	0.015	0.012
cg14873488	0.008	0.011	0.334	0.022	0.347	0.012	0.028	0.086	0.028	0.076	0.086	0.082	0.284	0.231
cg16256390	0.091	0.174	0.099	0.393	0.172	0.086	0.081	0.281	0.078	0.554	0.111	0.205	0.068	0.091
cg27043010	0.021	0.053	0.037	0.354	0.072	0.027	0.018	0.166	0.02	0.441	0.01	0.084	0.007	0.008
cg08635931	0.023	0.044	0.076	0.329	0.173	0.027	0.054	0.075	0.022	0.121	0.109	0.071	0.082	0.075
cg23917399	0.069	0.069	0.189	0.463	0.271	0.096	0.05	0.074	0.138	0.112	0.098	0.119	0.061	0.057
cg15473346	0.007	0.021	0.435	0.397	0.372	0.008	0.04	0.15	0.017	0.061	0.088	0.039	0.008	0.002
cg06121450	0.055	0.062	0.265	0.232	0.234	0.054	0.069	0.087	0.052	0.089	0.142	0.139	0.083	0.068
cg01088404	0.051	0.196	0.491	0.717	0.777	0.044	0.091	0.122	0.063	0.096	0.138	0.149	0.062	0.077
cg03989617	0.086	0.137	0.19	0.572	0.322	0.088	0.104	0.097	0.156	0.115	0.146	0.172	0.16	0.16
cg23243080	0.033	0.043	0.091	0.259	0.095	0.032	0.029	0.12	0.09	0.074	0.05	0.067	0.133	0.06
cg20369204	0.06	0.098	0.119	0.345	0.287	0.059	0.078	0.07	0.07	0.123	0.053	0.157	0.066	0.064
cg06688396	0.062	0.138	0.136	0.37	0.33	0.058	0.106	0.076	0.149	0.187	0.098	0.148	0.065	0.069
cg01447281	0.051	0.182	0.083	0.563	0.222	0.043	0.055	0.161	0.08	0.199	0.129	0.124	0.656	0.199
cg20826740	0.115	0.105	0.305	0.567	0.338	0.133	0.248	0.326	0.053	0.211	0.083	0.165	0.052	0.083
cg09592244	0.111	0.079	0.302	0.499	0.29	0.14	0.217	0.231	0.047	0.193	0.102	0.152	0.039	0.065
cg26971042	0.09	0.059	0.105	0.67	0.19	0.108	0.108	0.1	0.236	0.42	0.742	0.133	0.095	0.248
cg20826740	0.115	0.105	0.305	0.567	0.338	0.133	0.248	0.326	0.053	0.211	0.083	0.165	0.052	0.083
cg09592244	0.111	0.079	0.302	0.499	0.29	0.14	0.217	0.231	0.047	0.193	0.102	0.152	0.039	0.065
cg05406868	0.039	0.153	0.111	0.27	0.157	0.068	0.058	0.084	0.034	0.071	0.039	0.14	0.061	0.053
cg03743205	0.113	0.095	0.235	0.463	0.217	0.115	0.216	0.108	0.061	0.405	0.075	0.087	0.048	0.072
cg18660064	0.058	0.161	0.433	0.471	0.513	0.054	0.081	0.087	0.058	0.104	0.036	0.198	0.055	0.062
cg12446199	0.025	0.024	0.627	0.453	0.643	0.028	0.053	0.07	0.008	0.144	0.012	0.129	0.026	0.047
cg13315450	0.096	0.073	0.084	0.458	0.081	0.068	0.101	0.113	0.209	0.191	0.165	0.121	0.413	0.161
cg24011261	0.014	0.106	0.119	0.269	0.19	0.023	0.035	0.058	0.184	0.063	0.148	0.102	0.03	0.038
cg05551922	0.032	0.128	0.135	0.222	0.191	0.038	0.028	0.086	0.093	0.058	0.047	0.124	0.048	0.043
cg05055782	0.068	0.182	0.235	0.357	0.269	0.086	0.078	0.114	0.203	0.106	0.245	0.158	0.143	0.15
cg05047486	0.046	0.075	0.134	0.244	0.248	0.047	0.044	0.071	0.04	0.068	0.047	0.091	0.047	0.047
cg09802389	0.033	0.087	0.159	0.269	0.242	0.038	0.031	0.062	0.129	0.089	0.106	0.069	0.023	0.05
cg16277214	0.045	0.077	0.071	0.466	0.172	0.055	0.085	0.141	0.57	0.102	0.221	0.1	0.131	0.173
cg23930334	0.015	0.021	0.049	0.362	0.068	0.019	0.023	0.105	0.594	0.322	0.119	0.136	0.019	0.023
cg02256631	0.112	0.084	0.165	0.409	0.128	0.115	0.077	0.248	0.067	0.332	0.094	0.13	0.066	0.089
cg19323951	0.022	0.032	0.083	0.362	0.087	0.024	0.034	0.076	0.656	0.212	0.09	0.112	0.045	0.05
cg18584387	0.028	0.086	0.056	0.332	0.072	0.032	0.095	0.194	0.039	0.515	0.134	0.064	0.042	0.043
cg07066369	0.009	0.057	0.035	0.196	0.047	0.012	0.056	0.087	0.006	0.555	0.057	0.041	0.028	0.039
cg17580045	0.058	0.111	0.082	0.247	0.101	0.067	0.131	0.144	0.055	0.508	0.194	0.126	0.083	0.083
cg07392085	0.045	0.127	0.066	0.347	0.146	0.044	0.082	0.124	0.038	0.19	0.061	0.12	0.34	0.085
cg03434029	0.145	0.331	0.284	0.559	0.394	0.143	0.077	0.082	0.175	0.108	0.081	0.237	0.207	0.119
cg21072795	0.048	0.42	0.772	0.72	0.77	0.101	0.153	0.08	0.205	0.067	0.093	0.249	0.062	0.05
cg05783185	0.043	0.295	0.661	0.656	0.747	0.052	0.089	0.136	0.05	0.103	0.368	0.189	0.086	0.044
cg20369204	0.06	0.098	0.119	0.345	0.287	0.059	0.078	0.07	0.07	0.123	0.053	0.157	0.066	0.064
cg06688396	0.062	0.138	0.136	0.37	0.33	0.058	0.106	0.076	0.149	0.187	0.098	0.148	0.065	0.069
cg21161394	0.031	0.072	0.548	0.461	0.551	0.044	0.075	0.093	0.024	0.488	0.017	0.199	0.018	0.052
cg02648847	0.066	0.058	0.689	0.583	0.629	0.072	0.081	0.084	0.082	0.438	0.057	0.17	0.066	0.07
cg10708955	0.055	0.354	0.309	0.343	0.368	0.061	0.08	0.147	0.032	0.165	0.058	0.216	0.425	0.048
cg04658021	0.107	0.657	0.514	0.788	0.599	0.146	0.121	0.246	0.054	0.236	0.076	0.272	0.611	0.079
cg13759852	0.056	0.268	0.218	0.383	0.237	0.065	0.067	0.094	0.059	0.082	0.045	0.189	0.259	0.076
cg00066663	0.078	0.407	0.283	0.531	0.366	0.079	0.096	0.122	0.174	0.098	0.097	0.246	0.19	0.15
cg15832662	0.12	0.416	0.482	0.538	0.413	0.078	0.16	0.179	0.025	0.118	0.041	0.274	0.447	0.064
cg04111435	0.058	0.381	0.477	0.556	0.439	0.056	0.111	0.136	0.049	0.154	0.054	0.198	0.327	0.074
cg07687131	0.025	0.046	0.434	0.711	0.483	0.026	0.085	0.308	0.085	0.686	0.815	0.139	0.018	0.08
cg19286686	0.036	0.08	0.092	0.096	0.208	0.042	0.046	0.07	0.032	0.071	0.06	0.093	0.045	0.047
cg23967461	0.03	0.129	0.159	0.254	0.353	0.035	0.027	0.075	0.021	0.057	0.05	0.12	0.06	0.046
cg12273325	0.039	0.064	0.221	0.717	0.387	0.129	0.116	0.229	0.144	0.121	0.266	0.126	0.738	0.715
cg13357602	0.04	0.039	0.367	0.335	0.623	0.104	0.03	0.064	0.007	0.038	0.062	0.106	0.033	0.035
cg06857094	0.516	0.525	0.326	0.668	0.358	0.379	0.345	0.274	0.14	0.161	0.206	0.472	0.305	0.153
cg11073255	0.149	0.193	0.151	0.378	0.174	0.089	0.166	0.135	0.065	0.121	0.162	0.182	0.11	0.06
cg02205391	0.3	0.36	0.209	0.422	0.246	0.205	0.197	0.148	0.059	0.139	0.093	0.335	0.178	0.098
cg02676175	0.371	0.532	0.523	0.703	0.379	0.541	0.094	0.185	0.09	0.062	0.046	0.4	0.027	0.032
cg01616225	0.061	0.101	0.187	0.331	0.246	0.063	0.091	0.109	0.134	0.087	0.096	0.148	0.119	0.104
cg23924887	0.052	0.078	0.122	0.158	0.171	0.057	0.073	0.071	0.065	0.092	0.077	0.102	0.087	0.087
cg20744437	0.042	0.061	0.122	0.207	0.166	0.049	0.043	0.076	0.044	0.093	0.045	0.111	0.061	0.06
cg10708955	0.055	0.354	0.309	0.343	0.368	0.061	0.08	0.147	0.032	0.165	0.058	0.216	0.425	0.048
cg04658021	0.107	0.657	0.514	0.788	0.599	0.146	0.121	0.246	0.054	0.236	0.076	0.272	0.611	0.079
cg13759852	0.056	0.268	0.218	0.383	0.237	0.065	0.067	0.094	0.059	0.082	0.045	0.189	0.259	0.076
cg24011261	0.014	0.106	0.119	0.269	0.19	0.023	0.035	0.058	0.184	0.063	0.148	0.102	0.03	0.038
cg05551922	0.032	0.128	0.135	0.222	0.191	0.038	0.028	0.086	0.093	0.058	0.047	0.124	0.048	0.043
cg05055782	0.068	0.182	0.235	0.357	0.269	0.086	0.078	0.114	0.203	0.106	0.245	0.158	0.143	0.15
cg09284949	0.028	0.117	0.389	0.699	0.419	0.066	0.114	0.515	0.253	0.249	0.538	0.162	0.083	0.382
cg22093121	0.347	0.048	0.504	0.677	0.537	0.428	0.117	0.122	0.215	0.143	0.051	0.345	0.27	0.093
cg21161394	0.031	0.072	0.548	0.461	0.551	0.044	0.075	0.093	0.024	0.488	0.017	0.199	0.018	0.052
cg02648847	0.066	0.058	0.689	0.583	0.629	0.072	0.081	0.084	0.082	0.438	0.057	0.17	0.066	0.07
cg20078972	0.056	0.887	0.871	0.857	0.885	0.039	0.126	0.107	0.041	0.161	0.038	0.314	0.511	0.095
cg12871687	0.089	0.125	0.208	0.302	0.222	0.075	0.066	0.127	0.115	0.129	0.054	0.129	0.074	0.044
cg00901982	0.069	0.575	0.658	0.746	0.796	0.053	0.093	0.087	0.057	0.453	0.042	0.279	0.203	0.244
cg19163395	0.883	0.857	0.129	0.868	0.174	0.924	0.323	0.171	0.016	0.044	0.025	0.634	0.03	0.03
cg13279811	0.086	0.182	0.224	0.538	0.232	0.096	0.064	0.175	0.025	0.451	0.068	0.16	0.592	0.308
cg05389236	0.122	0.178	0.929	0.94	0.953	0.266	0.558	0.135	0.709	0.09	0.102	0.416	0.064	0.13
cg07905673	0.039	0.068	0.109	0.202	0.15	0.038	0.043	0.055	0.035	0.061	0.049	0.096	0.163	0.099
cg14698339	0.112	0.08	0.078	0.192	0.071	0.127	0.14	0.075	0.056	0.041	0.033	0.118	0.015	0.012
cg24691069	0.008	0.028	0.094	0.146	0.216	0.009	0.032	0.103	0.01	0.109	0.041	0.051	0.011	0.025
cg22501342	0.053	0.092	0.229	0.325	0.377	0.06	0.121	0.115	0.066	0.104	0.206	0.094	0.056	0.074
cg22274117	0.032	0.047	0.287	0.392	0.369	0.035	0.06	0.082	0.077	0.073	0.086	0.085	0.599	0.139
cg02012974	0.07	0.878	0.876	0.862	0.89	0.057	0.093	0.093	0.363	0.066	0.214	0.373	0.272	0.11
cg00252813	0.057	0.24	0.349	0.376	0.382	0.05	0.072	0.094	0.13	0.068	0.051	0.195	0.108	0.102
cg15350627	0.058	0.225	0.409	0.372	0.432	0.049	0.114	0.14	0.22	0.085	0.093	0.154	0.161	0.125
cg05766251	0.086	0.134	0.321	0.474	0.458	0.101	0.184	0.116	0.178	0.112	0.256	0.182	0.095	0.17
cg24691069	0.008	0.028	0.094	0.146	0.216	0.009	0.032	0.103	0.01	0.109	0.041	0.051	0.011	0.025
cg22501342	0.053	0.092	0.229	0.325	0.377	0.06	0.121	0.115	0.066	0.104	0.206	0.094	0.056	0.074
cg09046309	0.171	0.713	0.844	0.754	0.854	0.045	0.072	0.13	0.12	0.14	0.175	0.263	0.13	0.162
cg01870865	0.045	0.488	0.788	0.646	0.822	0.134	0.078	0.068	0.241	0.065	0.053	0.233	0.101	0.159
cg20518511	0.084	0.246	0.2	0.316	0.219	0.12	0.067	0.108	0.046	0.074	0.044	0.2	0.098	0.1
cg19092837	0.302	0.842	0.88	0.844	0.896	0.126	0.13	0.173	0.09	0.13	0.095	0.468	0.079	0.077
cg01664727	0.156	0.378	0.481	0.556	0.659	0.205	0.079	0.244	0.097	0.11	0.182	0.178	0.021	0.042
cg08462306	0.011	0.018	0.016	0.22	0.02	0.012	0.023	0.068	0.323	0.052	0.064	0.064	0.335	0.117
cg24254387	0.046	0.057	0.056	0.33	0.06	0.049	0.065	0.085	0.519	0.07	0.143	0.123	0.414	0.213
cg03780927	0.167	0.539	0.504	0.619	0.442	0.187	0.174	0.135	0.325	0.049	0.056	0.367	0.059	0.182
cg02105691	0.049	0.06	0.178	0.213	0.24	0.05	0.057	0.106	0.031	0.081	0.04	0.09	0.063	0.053
cg08884752	0.716	0.829	0.123	0.849	0.418	0.761	0.162	0.147	0.047	0.085	0.254	0.49	0.258	0.113
cg15832662	0.12	0.416	0.482	0.538	0.413	0.078	0.16	0.179	0.025	0.118	0.041	0.274	0.447	0.064
cg04111435	0.058	0.381	0.477	0.556	0.439	0.056	0.111	0.136	0.049	0.154	0.054	0.198	0.327	0.074
cg18584387	0.028	0.086	0.056	0.332	0.072	0.032	0.095	0.194	0.039	0.515	0.134	0.064	0.042	0.043
cg07066369	0.009	0.057	0.035	0.196	0.047	0.012	0.056	0.087	0.006	0.555	0.057	0.041	0.028	0.039
cg17580045	0.058	0.111	0.082	0.247	0.101	0.067	0.131	0.144	0.055	0.508	0.194	0.126	0.083	0.083
cg09469355	0.422	0.583	0.229	0.661	0.451	0.473	0.151	0.138	0.084	0.118	0.135	0.365	0.215	0.116
cg23655651	0.173	0.87	0.853	0.844	0.868	0.556	0.132	0.104	0.209	0.069	0.068	0.419	0.076	0.066
cg07244253	0.06	0.12	0.206	0.274	0.275	0.059	0.073	0.099	0.075	0.088	0.096	0.13	0.079	0.093
cg21570709	0.107	0.426	0.189	0.567	0.294	0.144	0.082	0.146	0.062	0.213	0.111	0.194	0.735	0.302
cg16256390	0.091	0.174	0.099	0.393	0.172	0.086	0.081	0.281	0.078	0.554	0.111	0.205	0.068	0.091
cg27043010	0.021	0.053	0.037	0.354	0.072	0.027	0.018	0.166	0.02	0.441	0.01	0.084	0.007	0.008
cg17988310	0.075	0.328	0.178	0.519	0.299	0.11	0.114	0.28	0.059	0.21	0.501	0.218	0.219	0.17
cg22249612	0.278	0.925	0.93	0.751	0.932	0.104	0.046	0.094	0.092	0.042	0.152	0.292	0.034	0.08
cg16779839	0.156	0.337	0.222	0.395	0.244	0.215	0.047	0.14	0.016	0.052	0.422	0.186	0.026	0.049
cg03173722	0.288	0.432	0.403	0.559	0.496	0.461	0.121	0.129	0.031	0.095	0.062	0.312	0.123	0.034
cg15770702	0.033	0.055	0.073	0.357	0.081	0.034	0.02	0.118	0.147	0.117	0.069	0.034	0.823	0.302
cg22820108	0.186	0.422	0.832	0.75	0.847	0.258	0.151	0.132	0.081	0.082	0.08	0.316	0.507	0.121
cg11930955	0.255	0.234	0.11	0.619	0.194	0.335	0.185	0.102	0.297	0.095	0.34	0.317	0.379	0.471
cg22236626	0.097	0.165	0.116	0.375	0.146	0.111	0.381	0.086	0.073	0.276	0.088	0.173	0.139	0.164
cg04193065	0.26	0.638	0.678	0.778	0.638	0.646	0.135	0.087	0.029	0.112	0.046	0.227	0.569	0.123
cg24442740	0.015	0.136	0.374	0.29	0.545	0.018	0.049	0.084	0.011	0.031	0.01	0.247	0.009	0.035
cg23643435	0.057	0.099	0.079	0.308	0.137	0.037	0.013	0.069	0.376	0.538	0.074	0.13	0.031	0.027
cg05604112	0.041	0.055	0.054	0.216	0.082	0.04	0.057	0.085	0.27	0.503	0.072	0.078	0.028	0.041
cg26551200	0.462	0.583	0.906	0.87	0.939	0.277	0.168	0.129	0.39	0.06	0.068	0.527	0.157	0.048
cg13100962	0.164	0.765	0.733	0.755	0.72	0.247	0.051	0.158	0.174	0.1	0.075	0.312	0.464	0.132
cg23903252	0.138	0.368	0.437	0.45	0.613	0.14	0.098	0.097	0.057	0.148	0.07	0.27	0.388	0.153
cg00753630	0.08	0.143	0.157	0.154	0.267	0.075	0.098	0.096	0.058	0.124	0.059	0.151	0.098	0.089
cg27527018	0.089	0.248	0.356	0.345	0.514	0.102	0.064	0.093	0.032	0.091	0.031	0.25	0.104	0.055
cg06961439	0.102	0.221	0.314	0.363	0.498	0.087	0.072	0.106	0.046	0.096	0.051	0.239	0.086	0.051
cg07377519	0.153	0.535	0.706	0.637	0.738	0.09	0.202	0.105	0.204	0.078	0.121	0.269	0.095	0.161
cg17766305	0.048	0.173	0.554	0.838	0.641	0.078	0.349	0.386	0.038	0.886	0.505	0.216	0.513	0.164
cg27534520	0.094	0.315	0.665	0.527	0.636	0.079	0.108	0.132	0.313	0.069	0.075	0.276	0.053	0.053
cg02997316	0.057	0.129	0.119	0.231	0.151	0.047	0.05	0.084	0.111	0.07	0.06	0.113	0.185	0.083
cg15896892	0.19	0.038	0.182	0.527	0.401	0.207	0.205	0.369	0.12	0.256	0.084	0.228	0.455	0.138
cg25104397	0.071	0.371	0.481	0.446	0.485	0.078	0.096	0.075	0.109	0.071	0.049	0.277	0.177	0.092
cg23247968	0.107	0.312	0.38	0.366	0.398	0.112	0.126	0.114	0.137	0.098	0.088	0.287	0.2	0.114
cg02076355	0.109	0.111	0.246	0.472	0.443	0.112	0.125	0.081	0.135	0.123	0.607	0.167	0.142	0.177
cg27642771	0.145	0.311	0.43	0.457	0.509	0.141	0.11	0.159	0.082	0.153	0.08	0.174	0.103	0.102
cg06811467	0.18	0.374	0.388	0.59	0.514	0.237	0.084	0.085	0.059	0.261	0.242	0.307	0.334	0.162
cg12034678	0.002	0.004	0.208	0.014	0.342	0.006	0.011	0.048	0.009	0.039	0.003	0.044	0	0.001
cg24235581	0.009	0.011	0.033	0.028	0.247	0.008	0.033	0.059	0.009	0.044	0.013	0.096	0.012	0.01
cg08360820	0.021	0.015	0.227	0.08	0.505	0.019	0.008	0.198	0.023	0.159	0	0.037	0.006	0.02
cg22306344	0.006	0.021	0.171	0.02	0.319	0.009	0.026	0.087	0.02	0.062	0.011	0.056	0.015	0.012
cg20300175	0.013	0.052	0.182	0.135	0.319	0.012	0.025	0.091	0.014	0.024	0.005	0.127	0.006	0.011
cg16755500	0.013	0.026	0.187	0.104	0.345	0.015	0.03	0.04	0.007	0.046	0.01	0.103	0.014	0.027
cg05041073	0.009	0.015	0.118	0.029	0.259	0.011	0.027	0.087	0.023	0.104	0.006	0.035	0.005	0.02
cg21936280	0.072	0.123	0.366	0.186	0.471	0.078	0.155	0.094	0.244	0.263	0.172	0.204	0.117	0.12
cg13607248	0.04	0.029	0.333	0.131	0.54	0.079	0.025	0.168	0.009	0.092	0.016	0.047	0.056	0.014
cg13357602	0.04	0.039	0.367	0.335	0.623	0.104	0.03	0.064	0.007	0.038	0.062	0.106	0.033	0.035
cg17772171	0.015	0.064	0.239	0.072	0.457	0.018	0.054	0.096	0.058	0.035	0.022	0.249	0.014	0.015
cg21344746	0.012	0.045	0.386	0.098	0.467	0.014	0.022	0.08	0.12	0.051	0.01	0.116	0.016	0.008
cg20243351	0.003	0.006	0.063	0.05	0.302	0.006	0.051	0.111	0.008	0.325	0.002	0.011	0.002	0.01
cg12537925	0.008	0.012	0.022	0.035	0.134	0.01	0.03	0.117	0.002	0.317	0.011	0.032	0.001	0.009
cg05768702	0.016	0.017	0.068	0.068	0.217	0.023	0.053	0.171	0.022	0.348	0.005	0.034	0.03	0.031
cg11411904	0.016	0.027	0.083	0.08	0.211	0.016	0.014	0.061	0.034	0.055	0.007	0.028	0.023	0.017
cg20300175	0.013	0.052	0.182	0.135	0.319	0.012	0.025	0.091	0.014	0.024	0.005	0.127	0.006	0.011
cg16755500	0.013	0.026	0.187	0.104	0.345	0.015	0.03	0.04	0.007	0.046	0.01	0.103	0.014	0.027
cg22620363	0.013	0.057	0.183	0.059	0.424	0.016	0.037	0.051	0.022	0.317	0.067	0.096	0	0.011
cg09431416	0.016	0.074	0.384	0.068	0.467	0.019	0.075	0.096	0.025	0.111	0.007	0.055	0.101	0.034
cg15846482	0.059	0.162	0.484	0.113	0.62	0.066	0.063	0.071	0.039	0.063	0.042	0.173	0.046	0.04
cg02971575	0.006	0.051	0.123	0.013	0.199	0.003	0.026	0.08	0.003	0.068	0.001	0.07	0.016	0.002
cg05388840	0.008	0.049	0.421	0.084	0.487	0.02	0.089	0.061	0.103	0.041	0.058	0.205	0.01	0.006
cg18213545	0.028	0.14	0.52	0.159	0.596	0.033	0.039	0.073	0.07	0.064	0.09	0.158	0.025	0.037
cg10831212	0.023	0.217	0.805	0.376	0.815	0.028	0.04	0.022	0.051	0.082	0.068	0.212	0	0.02
cg19210276	0.048	0.22	0.761	0.237	0.793	0.049	0.105	0.143	0.039	0.116	0.011	0.192	0.056	0.037
cg24442740	0.015	0.136	0.374	0.29	0.545	0.018	0.049	0.084	0.011	0.031	0.01	0.247	0.009	0.035
cg18213545	0.028	0.14	0.52	0.159	0.596	0.033	0.039	0.073	0.07	0.064	0.09	0.158	0.025	0.037
cg10831212	0.023	0.217	0.805	0.376	0.815	0.028	0.04	0.022	0.051	0.082	0.068	0.212	0	0.02
cg15050390	0.019	0.063	0.086	0.038	0.227	0.02	0.03	0.097	0.012	0.042	0	0.112	0.011	0.023
cg21169203	0.023	0.053	0.051	0.029	0.132	0.02	0.032	0.109	0.037	0.048	0.018	0.096	0.023	0.023
cg12894649	0.025	0.2	0.065	0.053	0.239	0.011	0.029	0.104	0.005	0.043	0.01	0.172	0.02	0.011
cg23944804	0.018	0.205	0.061	0.042	0.281	0.01	0.026	0.106	0.002	0.032	0.002	0.186	0.011	0.006
cg14603345	0.021	0.233	0.081	0.056	0.296	0.01	0.039	0.093	0.002	0.029	0	0.195	0.014	0.009
cg10831212	0.023	0.217	0.805	0.376	0.815	0.028	0.04	0.022	0.051	0.082	0.068	0.212	0	0.02
cg19210276	0.048	0.22	0.761	0.237	0.793	0.049	0.105	0.143	0.039	0.116	0.011	0.192	0.056	0.037
cg01943873	0.041	0.097	0.137	0.144	0.361	0.039	0.051	0.083	0.043	0.067	0.047	0.084	0.044	0.043
cg12446199	0.025	0.024	0.627	0.453	0.643	0.028	0.053	0.07	0.008	0.144	0.012	0.129	0.026	0.047
cg14612335	0.019	0.026	0.406	0.076	0.35	0.021	0.037	0.048	0.025	0.08	0.035	0.063	0.042	0.043
cg12894649	0.025	0.2	0.065	0.053	0.239	0.011	0.029	0.104	0.005	0.043	0.01	0.172	0.02	0.011
cg23944804	0.018	0.205	0.061	0.042	0.281	0.01	0.026	0.106	0.002	0.032	0.002	0.186	0.011	0.006
cg14603345	0.021	0.233	0.081	0.056	0.296	0.01	0.039	0.093	0.002	0.029	0	0.195	0.014	0.009
cg09878888	0.04	0.193	0.547	0.185	0.597	0.04	0.085	0.061	0.031	0.07	0.031	0.218	0.044	0.039
cg17329494	0.022	0.143	0.45	0.164	0.502	0.023	0.06	0.095	0.011	0.135	0.009	0.179	0.018	0.022
cg17679824	0.005	0.031	0.085	0.018	0.131	0.006	0.022	0.126	0.015	0.094	0.01	0.005	0.015	0.011
cg22580629	0.03	0.053	0.304	0.047	0.382	0.033	0.057	0.08	0.06	0.06	0.077	0.157	0.027	0.033
cg16853842	0.099	0.117	0.213	0.114	0.268	0.111	0.123	0.207	0.061	0.143	0.055	0.206	0.13	0.136
cg06923988	0.024	0.034	0.126	0.104	0.237	0.023	0.023	0.068	0.011	0.06	0.023	0.079	0.031	0.027
cg20645074	0.014	0.078	0.155	0.078	0.25	0.016	0.021	0.095	0.025	0.062	0.026	0.072	0.026	0.006
cg19078576	0.02	0.024	0.078	0.074	0.224	0.02	0.042	0.158	0.016	0.046	0.03	0.058	0.024	0.018
cg10094443	0.037	0.062	0.232	0.061	0.354	0.041	0.068	0.087	0.03	0.082	0.044	0.114	0.054	0.048
cg03835987	0.035	0.073	0.57	0.141	0.589	0.042	0.117	0.068	0.025	0.189	0.029	0.227	0.045	0.056
cg18086761	0.015	0.05	0.104	0.029	0.184	0.016	0.021	0.025	0.007	0.057	0.012	0.159	0.009	0.007
cg22074576	0.013	0.049	0.126	0.054	0.207	0.011	0.019	0.064	0.009	0.103	0.005	0.104	0.009	0.009
cg00992153	0.039	0.123	0.196	0.079	0.276	0.039	0.055	0.105	0.022	0.037	0.098	0.172	0.044	0.067
cg03934689	0.012	0.042	0.106	0.03	0.16	0.008	0.011	0.057	0.025	0.025	0.06	0.046	0.004	0.018
cg12459718	0.071	0.155	0.552	0.326	0.585	0.077	0.055	0.087	0.012	0.06	0.021	0.136	0.053	0.02
cg08903019	0.061	0.185	0.491	0.155	0.611	0.067	0.077	0.085	0.053	0.074	0.071	0.191	0.098	0.094
cg16208357	0.017	0.046	0.101	0.027	0.141	0.015	0.021	0.079	0.013	0.158	0.013	0.097	0.017	0.012
cg24104567	0.02	0.045	0.192	0.027	0.262	0.017	0.025	0.1	0.007	0.181	0	0.094	0.016	0.007
cg02763536	0.02	0.046	0.187	0.04	0.219	0.021	0.015	0.071	0.009	0.193	0.005	0.091	0.012	0.01
cg05368555	0.054	0.07	0.286	0.075	0.362	0.052	0.084	0.106	0.054	0.082	0.063	0.131	0.066	0.059
cg15460809	0.024	0.042	0.192	0.038	0.263	0.027	0.037	0.066	0.031	0.049	0.045	0.101	0.044	0.038
cg25365958	0.092	0.151	0.659	0.222	0.751	0.105	0.09	0.138	0.185	0.079	0.069	0.245	0.032	0.043
cg23051349	0.021	0.114	0.654	0.219	0.697	0.043	0.07	0.086	0.27	0.042	0.038	0.189	0.026	0.217
cg22328786	0.02	0.043	0.09	0.035	0.165	0.02	0.045	0.086	0.024	0.039	0.012	0.051	0.002	0.004
cg21272996	0.056	0.3	0.827	0.471	0.833	0.052	0.082	0.117	0.05	0.095	0.044	0.218	0.041	0.036
cg02501827	0.014	0.181	0.701	0.152	0.707	0.017	0.057	0.229	0.058	0.322	0.022	0.205	0.011	0.064
cg12492653	0.132	0.324	0.73	0.372	0.755	0.118	0.244	0.311	0.211	0.441	0.209	0.211	0.14	0.186
cg10077746	0.024	0.03	0.267	0.051	0.436	0.028	0.1	0.221	0.13	0.15	0.071	0.107	0.036	0.043
cg12097222	0.015	0.129	0.035	0.031	0.209	0.015	0.022	0.093	0.011	0.056	0.001	0.161	0.018	0.017
cg25618573	0.016	0.044	0.287	0.098	0.447	0.018	0.033	0.13	0.089	0.336	0.019	0.075	0.046	0.103
cg19553869	0.017	0.04	0.207	0.105	0.311	0.02	0.025	0.1	0.075	0.221	0.017	0.085	0.026	0.038
cg15201417	0.024	0.033	0.18	0.097	0.289	0.02	0.03	0.128	0.049	0.211	0.03	0.073	0.031	0.032
cg20293716	0.017	0.106	0.288	0.065	0.427	0.025	0.052	0.154	0.065	0.22	0.065	0.128	0.028	0.027
cg14570838	0.043	0.074	0.275	0.172	0.442	0.046	0.071	0.095	0.073	0.08	0.075	0.167	0.049	0.066
cg12917475	0.044	0.06	0.335	0.058	0.336	0.046	0.058	0.059	0.049	0.089	0.063	0.123	0.057	0.061
cg05877109	0.044	0.05	0.346	0.058	0.346	0.043	0.061	0.056	0.037	0.079	0.028	0.114	0.052	0.04
cg25149155	0.085	0.104	0.386	0.105	0.391	0.082	0.111	0.116	0.072	0.136	0.078	0.145	0.11	0.106
cg04542489	0.025	0.051	0.214	0.043	0.216	0.028	0.04	0.055	0.028	0.086	0.077	0.053	0.05	0.041
cg22707529	0.036	0.052	0.423	0.089	0.39	0.034	0.053	0.074	0.022	0.076	0.033	0.164	0.041	0.041
cg20865323	0.031	0.032	0.278	0.051	0.255	0.028	0.036	0.059	0.019	0.065	0.028	0.103	0.033	0.035
cg02758236	0.029	0.073	0.3	0.214	0.54	0.032	0.17	0.185	0.053	0.339	0.017	0.107	0.02	0.047
cg25554283	0.011	0.028	0.044	0.017	0.291	0.01	0.017	0.102	0.005	0.48	0.009	0.045	0.05	0.037
cg02366988	0.074	0.103	0.1	0.077	0.226	0.075	0.07	0.107	0.07	0.392	0.086	0.156	0.092	0.091
cg07060074	0.038	0.072	0.274	0.068	0.363	0.044	0.07	0.068	0.049	0.08	0.048	0.16	0.05	0.053
cg01105256	0.046	0.087	0.26	0.07	0.35	0.055	0.083	0.068	0.047	0.081	0.064	0.118	0.068	0.062
cg18049167	0.209	0.426	0.713	0.284	0.743	0.227	0.061	0.144	0.036	0.24	0.018	0.197	0.014	0.018
cg17329164	0.12	0.267	0.502	0.169	0.548	0.12	0.031	0.11	0.019	0.14	0.026	0.1	0.006	0.01
cg05133205	0.401	0.558	0.782	0.414	0.775	0.421	0.105	0.141	0.019	0.285	0.063	0.331	0	0.021
cg14130039	0.196	0.312	0.432	0.221	0.421	0.196	0.102	0.085	0.045	0.215	0.098	0.25	0.05	0.056
cg01088404	0.051	0.196	0.491	0.717	0.777	0.044	0.091	0.122	0.063	0.096	0.138	0.149	0.062	0.077
cg17598713	0.008	0.008	0.073	0.022	0.176	0.012	0.029	0.102	0.035	0.094	0.071	0.037	0.009	0.021
cg13904970	0.005	0.005	0.061	0.037	0.271	0.004	0.026	0.067	0.003	0.51	0.052	0.028	0.008	0.004
cg07588964	0.015	0.026	0.049	0.027	0.163	0.018	0.027	0.145	0.016	0.044	0.011	0.067	0.022	0.024
cg07333046	0.068	0.095	0.13	0.087	0.27	0.072	0.084	0.114	0.116	0.118	0.087	0.115	0.084	0.081
cg24035962	0.025	0.053	0.093	0.064	0.248	0.026	0.034	0.086	0.11	0.085	0.049	0.099	0.066	0.039
cg19286686	0.036	0.08	0.092	0.096	0.208	0.042	0.046	0.07	0.032	0.071	0.06	0.093	0.045	0.047
cg23967461	0.03	0.129	0.159	0.254	0.353	0.035	0.027	0.075	0.021	0.057	0.05	0.12	0.06	0.046
cg23398700	0.052	0.096	0.228	0.065	0.383	0.047	0.117	0.101	0.02	0.113	0.145	0.12	0.03	0.023
cg23039471	0.021	0.059	0.107	0.049	0.217	0.024	0.041	0.078	0.02	0.109	0.031	0.064	0.031	0.024
cg08920121	0.004	0.017	0.051	0.015	0.117	0.005	0.013	0.125	0.01	0.061	0.007	0.031	0.007	0.009
cg11678461	0.011	0.031	0.126	0.068	0.201	0.01	0.01	0.079	0.045	0.115	0.026	0.067	0.014	0.008
cg25011475	0.035	0.103	0.297	0.101	0.364	0.034	0.052	0.153	0.027	0.08	0.059	0.147	0	0.022
cg13912858	0.09	0.282	0.426	0.268	0.475	0.045	0.3	0.593	0.051	0.342	0.045	0.287	0.103	0.087
cg18974926	0.038	0.088	0.202	0.086	0.326	0.033	0.082	0.13	0.021	0.099	0.038	0.11	0.042	0.029
cg24691069	0.008	0.028	0.094	0.146	0.216	0.009	0.032	0.103	0.01	0.109	0.041	0.051	0.011	0.025
cg22501342	0.053	0.092	0.229	0.325	0.377	0.06	0.121	0.115	0.066	0.104	0.206	0.094	0.056	0.074
cg25040783	0.051	0.064	0.342	0.136	0.401	0.054	0.072	0.105	0.036	0.092	0.044	0.123	0.071	0.054
cg21319458	0.047	0.089	0.335	0.142	0.466	0.046	0.102	0.102	0.114	0.134	0.054	0.172	0.06	0.048
cg12589431	0.076	0.215	0.554	0.345	0.69	0.083	0.114	0.092	0.059	0.093	0.054	0.295	0.086	0.087
cg11211259	0.07	0.175	0.383	0.157	0.503	0.06	0.073	0.094	0.045	0.129	0.052	0.149	0.105	0.078
cg12894649	0.025	0.2	0.065	0.053	0.239	0.011	0.029	0.104	0.005	0.043	0.01	0.172	0.02	0.011
cg23944804	0.018	0.205	0.061	0.042	0.281	0.01	0.026	0.106	0.002	0.032	0.002	0.186	0.011	0.006
cg14603345	0.021	0.233	0.081	0.056	0.296	0.01	0.039	0.093	0.002	0.029	0	0.195	0.014	0.009
cg25840538	0.052	0.21	0.564	0.159	0.583	0.07	0.111	0.116	0.06	0.103	0.055	0.198	0.061	0.065
cg24679890	0.017	0.025	0.54	0.062	0.494	0.04	0.074	0.079	0.354	0.047	0.032	0.237	0.018	0.02
cg15109018	0.029	0.07	0.162	0.075	0.298	0.032	0.043	0.075	0.05	0.101	0.074	0.091	0.068	0.063
cg22707529	0.036	0.052	0.423	0.089	0.39	0.034	0.053	0.074	0.022	0.076	0.033	0.164	0.041	0.041
cg20865323	0.031	0.032	0.278	0.051	0.255	0.028	0.036	0.059	0.019	0.065	0.028	0.103	0.033	0.035
cg22522509	0.025	0.044	0.145	0.072	0.239	0.022	0.047	0.068	0.054	0.062	0.056	0.085	0.037	0.032
cg16015423	0.018	0.159	0.267	0.073	0.323	0.017	0.034	0.076	0.069	0.026	0.017	0.226	0.01	0.022
cg17765751	0.018	0.09	0.105	0.033	0.142	0.016	0.016	0.063	0.028	0.046	0.022	0.124	0.021	0.015
cg11758932	0.027	0.081	0.151	0.102	0.258	0.018	0.045	0.119	0.018	0.086	0.011	0.086	0.05	0.015
cg22066230	0.026	0.03	0.041	0.044	0.066	0.026	0.02	0.166	0.046	0.089	0.01	0.027	0.035	0.033
cg25618573	0.016	0.044	0.287	0.098	0.447	0.018	0.033	0.13	0.089	0.336	0.019	0.075	0.046	0.103
cg19553869	0.017	0.04	0.207	0.105	0.311	0.02	0.025	0.1	0.075	0.221	0.017	0.085	0.026	0.038
cg15201417	0.024	0.033	0.18	0.097	0.289	0.02	0.03	0.128	0.049	0.211	0.03	0.073	0.031	0.032
cg01919374	0.067	0.054	0.264	0.229	0.435	0.089	0.057	0.12	0.017	0.172	0.017	0.207	0.034	0.042
cg07060074	0.038	0.072	0.274	0.068	0.363	0.044	0.07	0.068	0.049	0.08	0.048	0.16	0.05	0.053
cg01105256	0.046	0.087	0.26	0.07	0.35	0.055	0.083	0.068	0.047	0.081	0.064	0.118	0.068	0.062
cg14247332	0.007	0.087	0.095	0.028	0.168	0.016	0.012	0.08	0.004	0.141	0	0.052	0.006	0.005
cg23243066	0.024	0.024	0.134	0.067	0.227	0.029	0.031	0.084	0.064	0.084	0.034	0.058	0.053	0.038
cg26645401	0.034	0.032	0.39	0.171	0.493	0.032	0.088	0.081	0.135	0.153	0.104	0.117	0.13	0.109
cg10683341	0.021	0.037	0.242	0.046	0.245	0.028	0.042	0.097	0.013	0.063	0.022	0.129	0.021	0.021
cg23651614	0.04	0.046	0.235	0.084	0.235	0.039	0.055	0.068	0.037	0.074	0.041	0.099	0.044	0.051
cg12685846	0.042	0.237	0.216	0.084	0.288	0.03	0.027	0.058	0.011	0.026	0.011	0.159	0.011	0.008
cg04969688	0.11	0.281	0.288	0.166	0.326	0.095	0.095	0.086	0.083	0.078	0.114	0.249	0.081	0.085
cg05164926	0.015	0.062	0.503	0.059	0.418	0.062	0.075	0.072	0.225	0.041	0.052	0.163	0	0.003
cg23243066	0.024	0.024	0.134	0.067	0.227	0.029	0.031	0.084	0.064	0.084	0.034	0.058	0.053	0.038
cg26645401	0.034	0.032	0.39	0.171	0.493	0.032	0.088	0.081	0.135	0.153	0.104	0.117	0.13	0.109
cg24215978	0.068	0.109	0.293	0.114	0.54	0.076	0.055	0.072	0.061	0.504	0.082	0.2	0.057	0.037
cg08545123	0.109	0.133	0.166	0.136	0.308	0.117	0.157	0.184	0.09	0.388	0.136	0.152	0.173	0.145
cg08899626	0.111	0.176	0.353	0.158	0.643	0.115	0.083	0.107	0.049	0.616	0.062	0.251	0.069	0.061
cg20533952	0.062	0.231	0.354	0.141	0.44	0.143	0.027	0.074	0.013	0.054	0.016	0.256	0.026	0.014
cg02519892	0.097	0.152	0.214	0.126	0.248	0.136	0.082	0.078	0.066	0.069	0.081	0.192	0.07	0.077
cg12666727	0.02	0.017	0.419	0.26	0.406	0.021	0.108	0.089	0.053	0.054	0.078	0.15	0.015	0.021
cg11911122	0.032	0.044	0.371	0.057	0.385	0.033	0.091	0.086	0.031	0.253	0.042	0.117	0.035	0.046
cg20351640	0.003	0.008	0.085	0.01	0.131	0.003	0.007	0.059	0.07	0.045	0.032	0.045	0.015	0.04
cg22066230	0.026	0.03	0.041	0.044	0.066	0.026	0.02	0.166	0.046	0.089	0.01	0.027	0.035	0.033
cg25618573	0.016	0.044	0.287	0.098	0.447	0.018	0.033	0.13	0.089	0.336	0.019	0.075	0.046	0.103
cg19553869	0.017	0.04	0.207	0.105	0.311	0.02	0.025	0.1	0.075	0.221	0.017	0.085	0.026	0.038
cg15201417	0.024	0.033	0.18	0.097	0.289	0.02	0.03	0.128	0.049	0.211	0.03	0.073	0.031	0.032
cg14825976	0.127	0.149	0.593	0.16	0.591	0.15	0.073	0.077	0.062	0.327	0.044	0.228	0.088	0.062
cg22454011	0.17	0.177	0.645	0.17	0.621	0.199	0.114	0.121	0.062	0.502	0.046	0.178	0.159	0.064
cg25374649	0.073	0.09	0.535	0.101	0.53	0.093	0.074	0.086	0.058	0.276	0.052	0.159	0.077	0.049
cg06410591	0.017	0.025	0.216	0.068	0.276	0.019	0.042	0.087	0.211	0.099	0.209	0.111	0.02	0.038
cg13860006	0.009	0.01	0.17	0.046	0.237	0.01	0.031	0.074	0.094	0.096	0.084	0.106	0.013	0.031
cg08169020	0.887	0.262	0.015	0.078	0.016	0.868	0.032	0.086	0.021	0.032	0.009	0.442	0.183	0.008
cg21204860	0.447	0.231	0.093	0.518	0.231	0.678	0.307	0.641	0.14	0.093	0.347	0.42	0.073	0.235
cg19654743	0.727	0.496	0.14	0.747	0.31	0.842	0.313	0.534	0.18	0.076	0.504	0.585	0.188	0.211
cg00324097	0.363	0.118	0.058	0.385	0.1	0.571	0.164	0.392	0.072	0.064	0.123	0.346	0.054	0.089
cg06513247	0.45	0.264	0.062	0.392	0.14	0.644	0.18	0.26	0.147	0.069	0.155	0.383	0.067	0.123
cg12897164	0.634	0.06	0.437	0.098	0.341	0.823	0.198	0.076	0.293	0.081	0.084	0.521	0.503	0.186
cg07218880	0.741	0.38	0.155	0.085	0.177	0.805	0.319	0.142	0.058	0.122	0.125	0.591	0.429	0.178
cg19163395	0.883	0.857	0.129	0.868	0.174	0.924	0.323	0.171	0.016	0.044	0.025	0.634	0.03	0.03
cg14789659	0.819	0.683	0.217	0.62	0.525	0.854	0.17	0.102	0.051	0.097	0.047	0.409	0.088	0.056
cg00928816	0.796	0.682	0.327	0.644	0.553	0.854	0.223	0.143	0.111	0.073	0.059	0.52	0.078	0.069
cg20746552	0.697	0.643	0.321	0.563	0.544	0.759	0.23	0.158	0.106	0.106	0.076	0.436	0.077	0.073
cg16389209	0.749	0.6	0.288	0.602	0.496	0.804	0.203	0.126	0.095	0.073	0.06	0.406	0.127	0.096
cg13522882	0.856	0.629	0.235	0.716	0.335	0.866	0.146	0.08	0.066	0.079	0.039	0.682	0.073	0.042
cg24733624	0.304	0.479	0.278	0.128	0.394	0.692	0.373	0.088	0.208	0.077	0.188	0.358	0.178	0.14
cg12827637	0.521	0.361	0.023	0.212	0.022	0.537	0.08	0.109	0.011	0.059	0.058	0.508	0.379	0.15
cg11975790	0.725	0.248	0.158	0.64	0.189	0.756	0.442	0.195	0.042	0.167	0.046	0.579	0.085	0.051
cg25607383	0.786	0.516	0.444	0.689	0.467	0.779	0.472	0.335	0.125	0.327	0.133	0.638	0.355	0.148
cg05906166	0.382	0.19	0.047	0.049	0.043	0.438	0.155	0.119	0.173	0.145	0.302	0.343	0.037	0.087
cg01424562	0.849	0.559	0.107	0.41	0.132	0.837	0.181	0.132	0.107	0.127	0.062	0.636	0.5	0.168
cg08832851	0.392	0.038	0.036	0.05	0.036	0.43	0.166	0.115	0.214	0.183	0.465	0.312	0.019	0.061
cg07520810	0.549	0.551	0.255	0.527	0.471	0.637	0.131	0.087	0.067	0.052	0.041	0.356	0.063	0.04
cg14789659	0.819	0.683	0.217	0.62	0.525	0.854	0.17	0.102	0.051	0.097	0.047	0.409	0.088	0.056
cg00928816	0.796	0.682	0.327	0.644	0.553	0.854	0.223	0.143	0.111	0.073	0.059	0.52	0.078	0.069
cg20746552	0.697	0.643	0.321	0.563	0.544	0.759	0.23	0.158	0.106	0.106	0.076	0.436	0.077	0.073
cg16401465	0.76	0.66	0.333	0.698	0.576	0.815	0.183	0.108	0.126	0.11	0.085	0.457	0.242	0.108
cg16389209	0.749	0.6	0.288	0.602	0.496	0.804	0.203	0.126	0.095	0.073	0.06	0.406	0.127	0.096
cg11006453	0.885	0.633	0.226	0.525	0.192	0.887	0.22	0.2	0.017	0.054	0.815	0.372	0.562	0.137
cg13157980	0.371	0.492	0.075	0.261	0.074	0.487	0.12	0.074	0.037	0.074	0.151	0.231	0.374	0.083
cg27377289	0.895	0.041	0.111	0.734	0.168	0.901	0.617	0.154	0.119	0.196	0.084	0.701	0.609	0.058
cg05098343	0.453	0.798	0.501	0.679	0.477	0.839	0.134	0.1	0.059	0.064	0.081	0.381	0.356	0.095
cg14789659	0.819	0.683	0.217	0.62	0.525	0.854	0.17	0.102	0.051	0.097	0.047	0.409	0.088	0.056
cg00928816	0.796	0.682	0.327	0.644	0.553	0.854	0.223	0.143	0.111	0.073	0.059	0.52	0.078	0.069
cg20746552	0.697	0.643	0.321	0.563	0.544	0.759	0.23	0.158	0.106	0.106	0.076	0.436	0.077	0.073
cg16389209	0.749	0.6	0.288	0.602	0.496	0.804	0.203	0.126	0.095	0.073	0.06	0.406	0.127	0.096
cg07520810	0.549	0.551	0.255	0.527	0.471	0.637	0.131	0.087	0.067	0.052	0.041	0.356	0.063	0.04
cg20746552	0.697	0.643	0.321	0.563	0.544	0.759	0.23	0.158	0.106	0.106	0.076	0.436	0.077	0.073
cg16401465	0.76	0.66	0.333	0.698	0.576	0.815	0.183	0.108	0.126	0.11	0.085	0.457	0.242	0.108
cg16389209	0.749	0.6	0.288	0.602	0.496	0.804	0.203	0.126	0.095	0.073	0.06	0.406	0.127	0.096
cg10502324	0.091	0.509	0.11	0.351	0.172	0.679	0.133	0.06	0.769	0.073	0.143	0.221	0.515	0.342
cg08309687	0.548	0.586	0.085	0.08	0.077	0.593	0.395	0.452	0.047	0.093	0.158	0.42	0.086	0.053
cg19692929	0.437	0.309	0.049	0.192	0.075	0.463	0.2	0.194	0.1	0.257	0.098	0.363	0.086	0.051
cg05052463	0.855	0.155	0.478	0.579	0.443	0.846	0.294	0.1	0.04	0.239	0.117	0.732	0.346	0.042
cg00458932	0.811	0.581	0.407	0.683	0.436	0.784	0.178	0.02	0.219	0.062	0.206	0.378	0.055	0.068
cg00936790	0.8	0.578	0.132	0.535	0.286	0.79	0.168	0.099	0.467	0.093	0.059	0.462	0.436	0.045
cg19645639	0.726	0.537	0.375	0.739	0.458	0.791	0.189	0.052	0.051	0.057	0.049	0.616	0.064	0.26
cg07520810	0.549	0.551	0.255	0.527	0.471	0.637	0.131	0.087	0.067	0.052	0.041	0.356	0.063	0.04
cg14789659	0.819	0.683	0.217	0.62	0.525	0.854	0.17	0.102	0.051	0.097	0.047	0.409	0.088	0.056
cg00928816	0.796	0.682	0.327	0.644	0.553	0.854	0.223	0.143	0.111	0.073	0.059	0.52	0.078	0.069
cg20746552	0.697	0.643	0.321	0.563	0.544	0.759	0.23	0.158	0.106	0.106	0.076	0.436	0.077	0.073
cg16389209	0.749	0.6	0.288	0.602	0.496	0.804	0.203	0.126	0.095	0.073	0.06	0.406	0.127	0.096
cg26141173	0.025	0.051	0.036	0.014	0.02	0.098	0.019	0.081	0.043	0.056	0.133	0.01	0.017	0.018
cg11829072	0.056	0.04	0.023	0.001	0.022	0.084	0	0.09	0.032	0.064	0.139	0	0.011	0.009
cg09825146	0.091	0.094	0.071	0.063	0.073	0.105	0.064	0.123	0.203	0.206	0.179	0.056	0.059	0.069
cg25375711	0.11	0.101	0.088	0.062	0.082	0.142	0.073	0.092	0.079	0.088	0.218	0.113	0.09	0.069
cg02737268	0.913	0.098	0.141	0.358	0.135	0.899	0.407	0.724	0.073	0.927	0.426	0.453	0.102	0.07
cg11316887	0.825	0.151	0.267	0.085	0.187	0.876	0.347	0.135	0.778	0.293	0.331	0.644	0.409	0.251
cg00795812	0.246	0.393	0.086	0.499	0.101	0.776	0.199	0.229	0.179	0.499	0.138	0.334	0.717	0.567
cg03024660	0.154	0.025	0.027	0.082	0.027	0.199	0.172	0.06	0.026	0.048	0.129	0.142	0.136	0.051
cg11006453	0.885	0.633	0.226	0.525	0.192	0.887	0.22	0.2	0.017	0.054	0.815	0.372	0.562	0.137
cg23731089	0.926	0.75	0.329	0.806	0.319	0.927	0.337	0.33	0.068	0.117	0.557	0.695	0.575	0.126
cg13157980	0.371	0.492	0.075	0.261	0.074	0.487	0.12	0.074	0.037	0.074	0.151	0.231	0.374	0.083
cg12474798	0.52	0.42	0.29	0.498	0.347	0.532	0.13	0.158	0.015	0.04	0.02	0.412	0.026	0.028
cg20684110	0.536	0.392	0.34	0.515	0.405	0.54	0.161	0.262	0.035	0.111	0.078	0.385	0.084	0.11
cg01005506	0.327	0.335	0.235	0.315	0.257	0.329	0.134	0.082	0.045	0.087	0.067	0.325	0.06	0.064
cg07520810	0.549	0.551	0.255	0.527	0.471	0.637	0.131	0.087	0.067	0.052	0.041	0.356	0.063	0.04
cg16401465	0.76	0.66	0.333	0.698	0.576	0.815	0.183	0.108	0.126	0.11	0.085	0.457	0.242	0.108
cg16389209	0.749	0.6	0.288	0.602	0.496	0.804	0.203	0.126	0.095	0.073	0.06	0.406	0.127	0.096
cg20805133	0.929	0.371	0.028	0.41	0.028	0.917	0.102	0.217	0.095	0.868	0.058	0.625	0.784	0.51
cg25526001	0.74	0.244	0.261	0.348	0.377	0.738	0.392	0.277	0.068	0.09	0.091	0.579	0.473	0.119
cg10807894	0.64	0.532	0.369	0.636	0.386	0.714	0.117	0.023	0.06	0.047	0.02	0.535	0.387	0.184
cg04858631	0.659	0.148	0.079	0.052	0.161	0.644	0.219	0.137	0.231	0.718	0.1	0.499	0.432	0.126
cg27037013	0.722	0.618	0.186	0.18	0.155	0.708	0.589	0.422	0.081	0.159	0.144	0.54	0.057	0.068
cg02646515	0.087	0.051	0.269	0.45	0.37	0.621	0.094	0.156	0.235	0.125	0.134	0.214	0.829	0.43
cg03934681	0.172	0.128	0.098	0.143	0.095	0.209	0.073	0	0.045	0.101	0.092	0.152	0.046	0.013
cg13442969	0.259	0.204	0.077	0.12	0.09	0.355	0.114	0.079	0.05	0.116	0.28	0.327	0.158	0.098
cg21204860	0.447	0.231	0.093	0.518	0.231	0.678	0.307	0.641	0.14	0.093	0.347	0.42	0.073	0.235
cg19654743	0.727	0.496	0.14	0.747	0.31	0.842	0.313	0.534	0.18	0.076	0.504	0.585	0.188	0.211
cg00324097	0.363	0.118	0.058	0.385	0.1	0.571	0.164	0.392	0.072	0.064	0.123	0.346	0.054	0.089
cg07176692	0.376	0.313	0.107	0.473	0.183	0.515	0.193	0.126	0.061	0.085	0.049	0.412	0.295	0.201
cg16829306	0.375	0.298	0.113	0.208	0.067	0.365	0.11	0.121	0.075	0.1	0.091	0.333	0.078	0.083
cg17084151	0.499	0.544	0.503	0.105	0.558	0.588	0.12	0.126	0.043	0.089	0.071	0.567	0.06	0.026
cg03974193	0.781	0.723	0.282	0.832	0.368	0.821	0.194	0.252	0.105	0.195	0.053	0.724	0.087	0.056
cg17230773	0.425	0.22	0.05	0.051	0.06	0.474	0.205	0.118	0.571	0.085	0.243	0.515	0.047	0.097
cg26077811	0.485	0.326	0.366	0.467	0.381	0.622	0.386	0.082	0.06	0.084	0.082	0.468	0.195	0.145
cg06608359	0.39	0.324	0.081	0.276	0.096	0.424	0.19	0.121	0.058	0.093	0.099	0.357	0.208	0.113
cg22109530	0.663	0.528	0.408	0.595	0.392	0.671	0.074	0.147	0.216	0.182	0.101	0.486	0.011	0.014
cg14515791	0.875	0.792	0.718	0.837	0.703	0.872	0.216	0.197	0.291	0.21	0.138	0.772	0.132	0.136
cg05033369	0.65	0.031	0.369	0.757	0.449	0.752	0.39	0.073	0.081	0.059	0.077	0.223	0.728	0.409
cg02962602	0.557	0.481	0.327	0.281	0.231	0.494	0.181	0.082	0.037	0.066	0.05	0.308	0.208	0.054
cg06025456	0.87	0.555	0.916	0.588	0.919	0.901	0.089	0.13	0.037	0.361	0.049	0.67	0.014	0.02
cg23359665	0.89	0.589	0.922	0.595	0.932	0.898	0.145	0.142	0.021	0.425	0.051	0.683	0.006	0.026
cg13934406	0.85	0.554	0.872	0.551	0.895	0.859	0.104	0.137	0.023	0.432	0.059	0.758	0.008	0.025
cg25426302	0.865	0.69	0.858	0.725	0.884	0.86	0.259	0.195	0.038	0.545	0.169	0.719	0.067	0.121
cg06108383	0.88	0.689	0.892	0.645	0.909	0.883	0.317	0.216	0.056	0.503	0.178	0.72	0.13	0.226
cg17113856	0.758	0.594	0.823	0.594	0.838	0.75	0.308	0.212	0.071	0.486	0.159	0.607	0.081	0.148
cg17150898	0.858	0.549	0.175	0.842	0.296	0.852	0.338	0.398	0.016	0.578	0.187	0.577	0.03	0.104
cg25499543	0.849	0.801	0.566	0.736	0.612	0.834	0.227	0.154	0.119	0.106	0.121	0.713	0.432	0.156
cg25503381	0.769	0.659	0.429	0.619	0.467	0.769	0.179	0.152	0.116	0.128	0.088	0.62	0.164	0.076
cg26141173	0.025	0.051	0.036	0.014	0.02	0.098	0.019	0.081	0.043	0.056	0.133	0.01	0.017	0.018
cg11829072	0.056	0.04	0.023	0.001	0.022	0.084	0	0.09	0.032	0.064	0.139	0	0.011	0.009
cg26547947	0.063	0.055	0.042	0.02	0.035	0.09	0.026	0.071	0.032	0.051	0.156	0.028	0.031	0.022
cg09825146	0.091	0.094	0.071	0.063	0.073	0.105	0.064	0.123	0.203	0.206	0.179	0.056	0.059	0.069
cg25375711	0.11	0.101	0.088	0.062	0.082	0.142	0.073	0.092	0.079	0.088	0.218	0.113	0.09	0.069
cg25913761	0.836	0.221	0.282	0.47	0.396	0.829	0.365	0.383	0.219	0.759	0.397	0.649	0.778	0.517
cg26955540	0.766	0.022	0.149	0.401	0.347	0.791	0.238	0.114	0.093	0.68	0.026	0.586	0.755	0.442
cg17322655	0.812	0.524	0.111	0.6	0.132	0.906	0.267	0.445	0.24	0.881	0.217	0.579	0.85	0.691
cg27051683	0.509	0.482	0.094	0.535	0.117	0.882	0.265	0.34	0.24	0.855	0.176	0.455	0.777	0.623
cg03889044	0.521	0.445	0.102	0.506	0.116	0.826	0.21	0.312	0.189	0.54	0.166	0.44	0.711	0.575
cg23565821	0.196	0.52	0.187	0.37	0.213	0.439	0.251	0.063	0.045	0.075	0.281	0.14	0.102	0.127
cg25170017	0.886	0.512	0.102	0.436	0.087	0.704	0.097	0.142	0.445	0.041	0.079	0.581	0.494	0.221
cg18842353	0.652	0.564	0.411	0.714	0.456	0.761	0.161	0.088	0.131	0.073	0.106	0.526	0.444	0.14
cg06578276	0.637	0.529	0.338	0.531	0.309	0.624	0.375	0.11	0.072	0.073	0.121	0.394	0.096	0.078
cg08884752	0.716	0.829	0.123	0.849	0.418	0.761	0.162	0.147	0.047	0.085	0.254	0.49	0.258	0.113
cg09757525	0.074	0.052	0.072	0.052	0.116	0.158	0.046	0.08	0.053	0.102	0.038	0.126	0.056	0.064
cg05492387	0.106	0.231	0.339	0.634	0.449	0.807	0.446	0.153	0.332	0.219	0.172	0.263	0.746	0.674
cg27023597	0.498	0.59	0.205	0.469	0.381	0.721	0.292	0.151	0.134	0.137	0.688	0.411	0.174	0.148
cg19856897	0.268	0.071	0.045	0.046	0.05	0.325	0.144	0.222	0.238	0.105	0.182	0.389	0.09	0.081
cg26401541	0.797	0.631	0.499	0.673	0.502	0.871	0.189	0.145	0.326	0.134	0.367	0.434	0.396	0.089
cg21204860	0.447	0.231	0.093	0.518	0.231	0.678	0.307	0.641	0.14	0.093	0.347	0.42	0.073	0.235
cg19654743	0.727	0.496	0.14	0.747	0.31	0.842	0.313	0.534	0.18	0.076	0.504	0.585	0.188	0.211
cg00324097	0.363	0.118	0.058	0.385	0.1	0.571	0.164	0.392	0.072	0.064	0.123	0.346	0.054	0.089
cg07438103	0.586	0.488	0.143	0.427	0.094	0.575	0.161	0.144	0.139	0.143	0.098	0.518	0.267	0.216
cg19147129	0.233	0.255	0.135	0.091	0.403	0.3	0.073	0.176	0.017	0.105	0.02	0.26	0.017	0.005
cg20897136	0.326	0.264	0.102	0.111	0.088	0.32	0.176	0.119	0.114	0.244	0.096	0.322	0.12	0.162
cg01839993	0.438	0.221	0.078	0.096	0.104	0.405	0.245	0.113	0.117	0.494	0.102	0.386	0.247	0.259
cg10592592	0.34	0.186	0.063	0.068	0.057	0.318	0.152	0.086	0.066	0.212	0.083	0.317	0.135	0.13
cg00957901	0.679	0.646	0.595	0.676	0.59	0.754	0.168	0.119	0.082	0.163	0.06	0.624	0.063	0.038
cg03064100	0.669	0.458	0.412	0.211	0.427	0.84	0.209	0.514	0.179	0.071	0.488	0.495	0.742	0.168
cg03626672	0.717	0.559	0.678	0.519	0.353	0.713	0.222	0.158	0.199	0.132	0.18	0.542	0.017	0.027
cg06025456	0.87	0.555	0.916	0.588	0.919	0.901	0.089	0.13	0.037	0.361	0.049	0.67	0.014	0.02
cg23359665	0.89	0.589	0.922	0.595	0.932	0.898	0.145	0.142	0.021	0.425	0.051	0.683	0.006	0.026
cg13934406	0.85	0.554	0.872	0.551	0.895	0.859	0.104	0.137	0.023	0.432	0.059	0.758	0.008	0.025
cg10551329	0.785	0.555	0.843	0.55	0.879	0.785	0.148	0.295	0.029	0.517	0.155	0.632	0.047	0.104
cg06108383	0.88	0.689	0.892	0.645	0.909	0.883	0.317	0.216	0.056	0.503	0.178	0.72	0.13	0.226
cg16481280	0.899	0.743	0.893	0.767	0.92	0.901	0.254	0.16	0.026	0.556	0.397	0.78	0.055	0.228
cg17113856	0.758	0.594	0.823	0.594	0.838	0.75	0.308	0.212	0.071	0.486	0.159	0.607	0.081	0.148
cg01582066	0.141	0.486	0.296	0.141	0.32	0.664	0.404	0.156	0.145	0.066	0.555	0.257	0.653	0.395
cg12793711	0.333	0.263	0.08	0.125	0.07	0.376	0.126	0.094	0.069	0.102	0.106	0.306	0.421	0.178
cg19628934	0.471	0.521	0.118	0.356	0.147	0.506	0.249	0.234	0.137	0.073	0.052	0.485	0.07	0.183
cg07586956	0.902	0.617	0.254	0.077	0.102	0.911	0.587	0.407	0.31	0.733	0.193	0.668	0.464	0.26
cg24524013	0.54	0.562	0.528	0.551	0.551	0.565	0.357	0.33	0.06	0.079	0.1	0.517	0.494	0.186
cg10517535	0.386	0.449	0.364	0.565	0.529	0.691	0.42	0.644	0.024	0.115	0.08	0.431	0.172	0.052
cg06025456	0.87	0.555	0.916	0.588	0.919	0.901	0.089	0.13	0.037	0.361	0.049	0.67	0.014	0.02
cg23359665	0.89	0.589	0.922	0.595	0.932	0.898	0.145	0.142	0.021	0.425	0.051	0.683	0.006	0.026
cg13934406	0.85	0.554	0.872	0.551	0.895	0.859	0.104	0.137	0.023	0.432	0.059	0.758	0.008	0.025
cg06108383	0.88	0.689	0.892	0.645	0.909	0.883	0.317	0.216	0.056	0.503	0.178	0.72	0.13	0.226
cg17113856	0.758	0.594	0.823	0.594	0.838	0.75	0.308	0.212	0.071	0.486	0.159	0.607	0.081	0.148
cg14611816	0.536	0.449	0.329	0.468	0.281	0.52	0.303	0.099	0.052	0.076	0.089	0.352	0.097	0.064
cg20741105	0.813	0.1	0.593	0.549	0.412	0.846	0.222	0.33	0.245	0.217	0.519	0.726	0.435	0.056
cg26648185	0.616	0.54	0.085	0.593	0.094	0.698	0.489	0.508	0.2	0.228	0.164	0.529	0.105	0.164
cg15376996	0.535	0.489	0.34	0.456	0.26	0.577	0.116	0.116	0.022	0.053	0.051	0.488	0.462	0.184
cg27051683	0.509	0.482	0.094	0.535	0.117	0.882	0.265	0.34	0.24	0.855	0.176	0.455	0.777	0.623
cg03889044	0.521	0.445	0.102	0.506	0.116	0.826	0.21	0.312	0.189	0.54	0.166	0.44	0.711	0.575
cg16215084	0.829	0.823	0.362	0.82	0.472	0.797	0.338	0.192	0.072	0.08	0.111	0.726	0.063	0.056
cg25251478	0.845	0.834	0.447	0.835	0.533	0.827	0.437	0.274	0.105	0.106	0.128	0.733	0.12	0.11
cg14032089	0.86	0.612	0.309	0.779	0.447	0.9	0.31	0.139	0.54	0.111	0.455	0.66	0.21	0.158
cg20968678	0.759	0.555	0.229	0.56	0.277	0.739	0.556	0.37	0.132	0.187	0.118	0.586	0.171	0.089
cg10316899	0.821	0.671	0.123	0.708	0.204	0.832	0.216	0.184	0.158	0.099	0.161	0.63	0.859	0.347
cg07165260	0.856	0.809	0.211	0.813	0.33	0.89	0.138	0.407	0.018	0.17	0.111	0.683	0.763	0.233
cg17824540	0.579	0.732	0.526	0.161	0.371	0.803	0.35	0.166	0.574	0.109	0.311	0.527	0.301	0.292
cg17161520	0.774	0.059	0.096	0.148	0.061	0.807	0.573	0.394	0.229	0.588	0.147	0.608	0.75	0.605
cg04163638	0.81	0.711	0.738	0.133	0.669	0.861	0.17	0.151	0.042	0.093	0.128	0.72	0.802	0.22
cg16767506	0.613	0.447	0.092	0.147	0.115	0.647	0.432	0.354	0.698	0.795	0.448	0.645	0.138	0.322
cg02745912	0.36	0.229	0.048	0.065	0.063	0.404	0.128	0.123	0.508	0.363	0.116	0.482	0.076	0.12
cg13264840	0.754	0.507	0.087	0.145	0.086	0.758	0.307	0.26	0.723	0.487	0.31	0.74	0.098	0.241
cg18571640	0.501	0.45	0.376	0.473	0.369	0.578	0.151	0.145	0.325	0.19	0.06	0.479	0.064	0.037
cg20668662	0.003	0.002	0.002	0.002	0.003	0.002	0.287	0.086	0.005	0.073	0.005	0.011	0.002	0.002
cg06368590	0.004	0.014	0.053	0.014	0.158	0.004	0.437	0.074	0.204	0.031	0.019	0.04	0.001	0.008
cg26792755	0.013	0.023	0.015	0.01	0.013	0.013	0.206	0.104	0.008	0.063	0	0.013	0.018	0.018
cg24888989	0.011	0.016	0.014	0.009	0.014	0.011	0.141	0.063	0.004	0.037	0.032	0.007	0.011	0.007
cg00702638	0.007	0.014	0.013	0.006	0.013	0.01	0.146	0.056	0.003	0.035	0.045	0.006	0.011	0.006
cg22920873	0.005	0.011	0.009	0.005	0.009	0.006	0.115	0.067	0.014	0.039	0.004	0	0.005	0.004
cg02096656	0.089	0.121	0.134	0.116	0.126	0.086	0.162	0.101	0.065	0.19	0.061	0.092	0.154	0.165
cg13331354	0.003	0.006	0.006	0.003	0.005	0.005	0.172	0	0.005	0.03	0.187	0.007	0.011	0.009
cg24888989	0.011	0.016	0.014	0.009	0.014	0.011	0.141	0.063	0.004	0.037	0.032	0.007	0.011	0.007
cg00702638	0.007	0.014	0.013	0.006	0.013	0.01	0.146	0.056	0.003	0.035	0.045	0.006	0.011	0.006
cg19291355	0.018	0.055	0.029	0.016	0.019	0.017	0.326	0.147	0.009	0.138	0.026	0.028	0.058	0.024
cg05917988	0.086	0.189	0.112	0.077	0.1	0.075	0.315	0.179	0.075	0.42	0.097	0.122	0.188	0.135
cg14284618	0.027	0.031	0.028	0.026	0.029	0.035	0.317	0.057	0.034	0.057	0.108	0.069	0.041	0.026
cg04306050	0.046	0.012	0.014	0.017	0.013	0.013	0.14	0.063	0.01	0.042	0	0.012	0.004	0.017
cg26660541	0.01	0.021	0.013	0.016	0.012	0.012	0.158	0.084	0.007	0.066	0.012	0.024	0.02	0.018
cg20160885	0.086	0.129	0.104	0.096	0.093	0.09	0.277	0.261	0.059	0.162	0.124	0.115	0.159	0.127
cg10569694	0.063	0.118	0.08	0.068	0.079	0.058	0.228	0.126	0.096	0.14	0.173	0.117	0.131	0.131
cg09934056	0.049	0.053	0.048	0.046	0.045	0.053	0.425	0.101	0.053	0.117	0.093	0.075	0.08	0.062
cg08382235	0.005	0.012	0.007	0.008	0.01	0.005	0.524	0.129	0.098	0.538	0.019	0.036	0.017	0.209
cg14377596	0.007	0.01	0.011	0.006	0.012	0.009	0.294	0.108	0.196	0.19	0.029	0.031	0.014	0.01
cg23156348	0.029	0.061	0.057	0.03	0.042	0.031	0.286	0.086	0.027	0.109	0.031	0.05	0.042	0.041
cg08128768	0.008	0.008	0.035	0.007	0.02	0.006	0.399	0.082	0.038	0.036	0.568	0.038	0.017	0.027
cg24794433	0.06	0.059	0.095	0.064	0.078	0.053	0.491	0.124	0.06	0.101	0.492	0.134	0.082	0.092
cg26104083	0.014	0.031	0.024	0.021	0.029	0.01	0.703	0.682	0.06	0.585	0.057	0.051	0.009	0.03
cg17697016	0.223	0.266	0.26	0.235	0.288	0.213	0.653	0.734	0.117	0.63	0.268	0.216	0.113	0.195
cg03717588	0.041	0.055	0.042	0.032	0.048	0.031	0.412	0.212	0.021	0.283	0.049	0.075	0.026	0.039
cg24458609	0.09	0.15	0.113	0.094	0.141	0.089	0.416	0.162	0.043	0.402	0.085	0.159	0.054	0.046
cg16630989	0.01	0.01	0.014	0.013	0.011	0.011	0.158	0.14	0.012	0.046	0.015	0.025	0.031	0.03
cg11751645	0.037	0.092	0.062	0.05	0.084	0.045	0.402	0.147	0.012	0.297	0.018	0.067	0.016	0.019
cg07816687	0.028	0.055	0.043	0.042	0.064	0.032	0.418	0.601	0.009	0.044	0.014	0.063	0.034	0.061
cg05436064	0.006	0.014	0.012	0.007	0.027	0.009	0.308	0.53	0.002	0.061	0.024	0.027	0	0.009
cg09030672	0.069	0.075	0.072	0.067	0.084	0.063	0.362	0.456	0.089	0.118	0.072	0.09	0.072	0.072
cg01099231	0.004	0.012	0.009	0.007	0.005	0.007	0.14	0.074	0.008	0.166	0.015	0.002	0.015	0.008
cg04221117	0.114	0.07	0.078	0.069	0.065	0.1	0.586	0.34	0.068	0.192	0.081	0.041	0.157	0.047
cg20161976	0.027	0.051	0.054	0.035	0.064	0.03	0.399	0.1	0.063	0.342	0.037	0.083	0.05	0.059
cg22880620	0.051	0.054	0.057	0.049	0.049	0.053	0.243	0.141	0.066	0.094	0.171	0.114	0.077	0.081
cg01626459	0.029	0.031	0.04	0.031	0.034	0.027	0.35	0.165	0.041	0.124	0.219	0.066	0.04	0.034
cg25252585	0.008	0.016	0.012	0.009	0.024	0.009	0.43	0.346	0.006	0.63	0.01	0.003	0.011	0.008
cg04814450	0.047	0.05	0.049	0.042	0.04	0.043	0.361	0.11	0.055	0.091	0.137	0.11	0.059	0.084
cg26956371	0.021	0.079	0.052	0.023	0.039	0.021	0.21	0.131	0.004	0.079	0.005	0.037	0.021	0.024
cg17046776	0.021	0.074	0.117	0.035	0.108	0.017	0.286	0.111	0.014	0.054	0.084	0.076	0.017	0.014
cg07816687	0.028	0.055	0.043	0.042	0.064	0.032	0.418	0.601	0.009	0.044	0.014	0.063	0.034	0.061
cg05436064	0.006	0.014	0.012	0.007	0.027	0.009	0.308	0.53	0.002	0.061	0.024	0.027	0	0.009
cg09030672	0.069	0.075	0.072	0.067	0.084	0.063	0.362	0.456	0.089	0.118	0.072	0.09	0.072	0.072
cg25940946	0.012	0.014	0.017	0.012	0.016	0.009	0.193	0.251	0.032	0.044	0.051	0.012	0.018	0.019
cg25037461	0.068	0.061	0.068	0.056	0.066	0.054	0.166	0.173	0.081	0.076	0.112	0.082	0.085	0.085
cg12041387	0.065	0.07	0.057	0.057	0.062	0.058	0.359	0.174	0.035	0.106	0.052	0.087	0.03	0.09
cg08835113	0.045	0.049	0.039	0.038	0.038	0.036	0.299	0.21	0.033	0.137	0.069	0.071	0.031	0.06
cg01697719	0.006	0.052	0.01	0.007	0.01	0.006	0.511	0.122	0.069	0.808	0.028	0.027	0.012	0.212
cg19827023	0.054	0.067	0.069	0.06	0.064	0.061	0.415	0.176	0.129	0.144	0.078	0.115	0.046	0.06
cg13496979	0.016	0.063	0.027	0.016	0.022	0.016	0.371	0.154	0.004	0.576	0.013	0.057	0.016	0.025
cg08455275	0.017	0.018	0.016	0.013	0.014	0.015	0.204	0.125	0.196	0.05	0.039	0.024	0.009	0.018
cg21406075	0.05	0.098	0.083	0.056	0.088	0.053	0.647	0.469	0.109	0.461	0.051	0.078	0.04	0.123
cg09248054	0.009	0.015	0.008	0.012	0.012	0.01	0.487	0.214	0.02	0.929	0.006	0.054	0.019	0.018
cg16318112	0.032	0.04	0.034	0.046	0.042	0.038	0.435	0.21	0.05	0.939	0.093	0.069	0.046	0.036
cg00532413	0.032	0.038	0.04	0.036	0.036	0.033	0.246	0.098	0.075	0.075	0.055	0.057	0.054	0.052
cg05091570	0.038	0.044	0.048	0.031	0.04	0.032	0.406	0.12	0.216	0.276	0.115	0.077	0.026	0.063
cg26942121	0.01	0.032	0.05	0.011	0.041	0.008	0.167	0.079	0.041	0.05	0.066	0.06	0.007	0.014
cg16821992	0.033	0.053	0.172	0.118	0.32	0.046	0.474	0.077	0.237	0.063	0.056	0.071	0.04	0.044
cg23881926	0.004	0.058	0.018	0.008	0.015	0.01	0.556	0.456	0.017	0.843	0.007	0.025	0.064	0.05
cg01602153	0.005	0.049	0.015	0.007	0.015	0.014	0.459	0.471	0.023	0.787	0.009	0.029	0.037	0.037
cg12041387	0.065	0.07	0.057	0.057	0.062	0.058	0.359	0.174	0.035	0.106	0.052	0.087	0.03	0.09
cg08835113	0.045	0.049	0.039	0.038	0.038	0.036	0.299	0.21	0.033	0.137	0.069	0.071	0.031	0.06
cg14362630	0.032	0.087	0.037	0.022	0.035	0.03	0.465	0.146	0.087	0.57	0.012	0.1	0.116	0.067
cg15460348	0.032	0.03	0.044	0.038	0.037	0.034	0.594	0.276	0.172	0.811	0.066	0.034	0.058	0.089
cg20261167	0.032	0.039	0.053	0.041	0.054	0.031	0.626	0.288	0.653	0.73	0.173	0.036	0.081	0.101
cg10171357	0.069	0.144	0.106	0.074	0.125	0.065	0.692	0.491	0.148	0.572	0.114	0.099	0.08	0.212
cg04854226	0.066	0.122	0.101	0.063	0.107	0.065	0.723	0.335	0.228	0.675	0.047	0.09	0.088	0.172
cg22943986	0.088	0.166	0.139	0.133	0.181	0.102	0.551	0.681	0.019	0.493	0.015	0.236	0.035	0.027
cg04737131	0.04	0.07	0.056	0.066	0.067	0.034	0.496	0.712	0.015	0.277	0.024	0.116	0.001	0.004
cg09210519	0.004	0.008	0.02	0.007	0.015	0.011	0.184	0.2	0.007	0.263	0	0.003	0.003	0.009
cg11819799	0.138	0.128	0.185	0.105	0.156	0.108	0.312	0.219	0.077	0.209	0.082	0.101	0.148	0.147
cg22892607	0.059	0.074	0.062	0.058	0.071	0.064	0.578	0.227	0.191	0.353	0.248	0.103	0.074	0.151
cg00588920	0.019	0.027	0.034	0.022	0.057	0.015	0.353	0.291	0.052	0.401	0.026	0.033	0.056	0.04
cg08128768	0.008	0.008	0.035	0.007	0.02	0.006	0.399	0.082	0.038	0.036	0.568	0.038	0.017	0.027
cg24794433	0.06	0.059	0.095	0.064	0.078	0.053	0.491	0.124	0.06	0.101	0.492	0.134	0.082	0.092
cg01978368	0.034	0.035	0.04	0.039	0.04	0.033	0.278	0.129	0.039	0.091	0.189	0.042	0.086	0.048
cg17982497	0.052	0.078	0.064	0.054	0.07	0.053	0.657	0.594	0.122	0.613	0.053	0.084	0.05	0.119
cg11586448	0.044	0.044	0.049	0.039	0.032	0.045	0.653	0.145	0.556	0.177	0.091	0.056	0.603	0.132
cg14517743	0.028	0.036	0.064	0.041	0.144	0.03	0.464	0.213	0.019	0.661	0.022	0.053	0.055	0.067
cg24311272	0.026	0.027	0.056	0.022	0.039	0.029	0.315	0.202	0.01	0.077	0.339	0.069	0.031	0.045
cg02384857	0.066	0.105	0.056	0.099	0.081	0.055	0.695	0.774	0.064	0.328	0.041	0.066	0.107	0.31
cg23414876	0.049	0.067	0.063	0.052	0.075	0.05	0.399	0.413	0.066	0.087	0.058	0.128	0.069	0.068
cg12219325	0.026	0.06	0.036	0.027	0.03	0.029	0.443	0.227	0.085	0.656	0.041	0.042	0.065	0.061
cg10020892	0.024	0.03	0.018	0.021	0.023	0.026	0.716	0.139	0.275	0.29	0.727	0.043	0.298	0.339
cg15299510	0.056	0.051	0.062	0.045	0.071	0.061	0.38	0.074	0.073	0.087	0.312	0.091	0.128	0.09
cg09508531	0.017	0.032	0.022	0.015	0.024	0.016	0.254	0.261	0.028	0.215	0.055	0.084	0.02	0.023
cg10480584	0.07	0.129	0.157	0.083	0.147	0.052	0.179	0.314	0.228	0.401	0.1	0.153	0.066	0.087
cg00740088	0.07	0.151	0.124	0.081	0.147	0.075	0.622	0.27	0.082	0.688	0.113	0.109	0.042	0.051
cg03036557	0.015	0.054	0.032	0.016	0.049	0.017	0.217	0.241	0.006	0.166	0.016	0.046	0.027	0.016
cg12678562	0.011	0.051	0.035	0.015	0.041	0.014	0.208	0.221	0.023	0.148	0.025	0.055	0.025	0.015
cg10548038	0.015	0.032	0.024	0.008	0.025	0.011	0.089	0.17	0.003	0.1	0.002	0.031	0.011	0.002
cg13744663	0.026	0.035	0.04	0.025	0.043	0.024	0.091	0.099	0.019	0.136	0.024	0.046	0.028	0.034
cg01411786	0.018	0.031	0.025	0.021	0.036	0.02	0.398	0.326	0.3	0.302	0.075	0.077	0.013	0.044
cg18569335	0.022	0.133	0.069	0.039	0.059	0.016	0.209	0.285	0.048	0.277	0.11	0.041	0.081	0.081
cg04368796	0.008	0.092	0.037	0.011	0.029	0.009	0.268	0.246	0.021	0.261	0.073	0.012	0.037	0.032
cg15673540	0.12	0.181	0.148	0.122	0.158	0.116	0.167	0.158	0.132	0.607	0.168	0.166	0.49	0.362
cg24438423	0.094	0.185	0.131	0.104	0.134	0.094	0.147	0.145	0.095	0.405	0.064	0.127	0.422	0.237
cg23986145	0.064	0.122	0.07	0.058	0.069	0.06	0.123	0.135	0.062	0.337	0.078	0.104	0.301	0.121
cg01579535	0.087	0.105	0.106	0.098	0.105	0.103	0.382	0.476	0.062	0.12	0.163	0.107	0.119	0.121
cg02264990	0.017	0.025	0.033	0.014	0.025	0.017	0.372	0.609	0.049	0.386	0.069	0.031	0.008	0.02
cg09720701	0.051	0.053	0.061	0.054	0.057	0.054	0.425	0.569	0.051	0.094	0.071	0.075	0.105	0.087
cg05472468	0.016	0.035	0.032	0.018	0.066	0.014	0.427	0.391	0.088	0.599	0.037	0.064	0.012	0.018
cg01490094	0.048	0.095	0.097	0.065	0.132	0.049	0.407	0.348	0.128	0.551	0.071	0.091	0.046	0.081
cg01218945	0.027	0.027	0.028	0.025	0.025	0.025	0.148	0.05	0.048	0.059	0.048	0.045	0.036	0.04
cg08512490	0.054	0.047	0.054	0.044	0.049	0.044	0.229	0.083	0.035	0.09	0.048	0.056	0.07	0.07
cg10606240	0.049	0.073	0.065	0.046	0.067	0.051	0.647	0.377	0.74	0.249	0.087	0.075	0.192	0.037
cg23881926	0.004	0.058	0.018	0.008	0.015	0.01	0.556	0.456	0.017	0.843	0.007	0.025	0.064	0.05
cg01602153	0.005	0.049	0.015	0.007	0.015	0.014	0.459	0.471	0.023	0.787	0.009	0.029	0.037	0.037
cg19437868	0.039	0.047	0.04	0.038	0.045	0.036	0.312	0.077	0.09	0.31	0.065	0.115	0.066	0.051
cg03036557	0.015	0.054	0.032	0.016	0.049	0.017	0.217	0.241	0.006	0.166	0.016	0.046	0.027	0.016
cg12678562	0.011	0.051	0.035	0.015	0.041	0.014	0.208	0.221	0.023	0.148	0.025	0.055	0.025	0.015
cg10548038	0.015	0.032	0.024	0.008	0.025	0.011	0.089	0.17	0.003	0.1	0.002	0.031	0.011	0.002
cg14729148	0.031	0.033	0.033	0.034	0.029	0.031	0.653	0.373	0.095	0.586	0.365	0.06	0.196	0.273
cg13974464	0.153	0.194	0.221	0.176	0.242	0.218	0.485	0.096	0.013	0.033	0.018	0.197	0.016	0.013
cg07056644	0.057	0.102	0.078	0.055	0.078	0.049	0.48	0.505	0.047	0.369	0.042	0.106	0.021	0.065
cg23166970	0.024	0.05	0.086	0.099	0.082	0.026	0.223	0.096	0.036	0.066	0.032	0.057	0.046	0.04
cg03344955	0.043	0.062	0.16	0.14	0.19	0.047	0.172	0.116	0.042	0.106	0.08	0.075	0.081	0.067
cg08101303	0.013	0.022	0.013	0.01	0.013	0.01	0.221	0.176	0.028	0.388	0.038	0.041	0.009	0.015
cg02101486	0.046	0.061	0.047	0.044	0.056	0.037	0.329	0.121	0.092	0.285	0.125	0.062	0.061	0.055
cg10102418	0.045	0.058	0.058	0.05	0.05	0.045	0.234	0.074	0.055	0.077	0.057	0.075	0.061	0.071
cg27509306	0.055	0.078	0.071	0.054	0.059	0.051	0.222	0.079	0.064	0.084	0.068	0.095	0.074	0.081
cg10171357	0.069	0.144	0.106	0.074	0.125	0.065	0.692	0.491	0.148	0.572	0.114	0.099	0.08	0.212
cg04854226	0.066	0.122	0.101	0.063	0.107	0.065	0.723	0.335	0.228	0.675	0.047	0.09	0.088	0.172
cg08561732	0.094	0.138	0.113	0.08	0.124	0.082	0.657	0.398	0.227	0.493	0.082	0.124	0.084	0.148
cg10128894	0.036	0.04	0.045	0.039	0.047	0.035	0.235	0.181	0.051	0.112	0.071	0.047	0.027	0.054
cg20575277	0.05	0.052	0.059	0.058	0.054	0.051	0.326	0.157	0.052	0.281	0.058	0.074	0.06	0.086
cg20889818	0.021	0.073	0.048	0.024	0.069	0.029	0.53	0.47	0.036	0.819	0.009	0.067	0.027	0.084
cg10589443	0.008	0.017	0.218	0.026	0.301	0.013	0.403	0.502	0.008	0.084	0.018	0.055	0.088	0.012
cg06133110	0.061	0.128	0.408	0.129	0.492	0.048	0.574	0.578	0.044	0.119	0.059	0.122	0.282	0.066
cg02221347	0.026	0.027	0.028	0.022	0.026	0.025	0.118	0.09	0.022	0.673	0.036	0.032	0.041	0.035
cg18110444	0.001	0.005	0.004	0.003	0.003	0.003	0.434	0.212	0.011	0.936	0.002	0.019	0.168	0.096
cg23996306	0.046	0.047	0.047	0.042	0.046	0.043	0.1	0.063	0.052	0.467	0.052	0.078	0.066	0.067
cg21800284	0.14	0.174	0.157	0.151	0.153	0.143	0.686	0.605	0.145	0.206	0.087	0.21	0.052	0.088
cg12396523	0.026	0.081	0.127	0.072	0.207	0.03	0.335	0.098	0.164	0.076	0.059	0.133	0.03	0.027
cg03615269	0.029	0.041	0.071	0.04	0.135	0.032	0.281	0.029	0.291	0.049	0.113	0.054	0.039	0.031
cg21507095	0.059	0.069	0.071	0.054	0.065	0.044	0.394	0.109	0.113	0.257	0.088	0.094	0.125	0.193
cg16480692	0.024	0.037	0.028	0.024	0.022	0.025	0.139	0.087	0.006	0.089	0.006	0.063	0.045	0.023
cg23981871	0.156	0.158	0.162	0.159	0.165	0.167	0.761	0.64	0.139	0.118	0.155	0.204	0.044	0.384
cg09387749	0.146	0.183	0.15	0.133	0.167	0.167	0.766	0.615	0.101	0.153	0.153	0.163	0.084	0.427
cg00723994	0.023	0.106	0.044	0.026	0.067	0.023	0.636	0.861	0.016	0.91	0.013	0.089	0.005	0.014
cg26708220	0.024	0.087	0.035	0.024	0.045	0.016	0.622	0.819	0.159	0.726	0.071	0.063	0.041	0.042
cg01128482	0.122	0.17	0.164	0.126	0.173	0.13	0.731	0.641	0.033	0.141	0.087	0.186	0.068	0.49
cg12634591	0.077	0.125	0.106	0.074	0.12	0.075	0.485	0.404	0.054	0.191	0.072	0.14	0.065	0.27
cg23981871	0.156	0.158	0.162	0.159	0.165	0.167	0.761	0.64	0.139	0.118	0.155	0.204	0.044	0.384
cg09387749	0.146	0.183	0.15	0.133	0.167	0.167	0.766	0.615	0.101	0.153	0.153	0.163	0.084	0.427
cg16594139	0.083	0.095	0.052	0.058	0.05	0.064	0.356	0.397	0.076	0.081	0.091	0.075	0.038	0.087
cg26267310	0.096	0.095	0.062	0.067	0.064	0.084	0.438	0.568	0.092	0.08	0.091	0.098	0.054	0.143
cg01579535	0.087	0.105	0.106	0.098	0.105	0.103	0.382	0.476	0.062	0.12	0.163	0.107	0.119	0.121
cg02264990	0.017	0.025	0.033	0.014	0.025	0.017	0.372	0.609	0.049	0.386	0.069	0.031	0.008	0.02
cg03923561	0.041	0.05	0.065	0.052	0.057	0.044	0.471	0.668	0.038	0.607	0.113	0.079	0.092	0.098
cg09720701	0.051	0.053	0.061	0.054	0.057	0.054	0.425	0.569	0.051	0.094	0.071	0.075	0.105	0.087
cg13580767	0.015	0.013	0.012	0.008	0.013	0.014	0.026	1	0.007	0.037	0.021	0.02	0.023	0.016
cg01751134	0.008	0.021	0.005	0.007	0.008	0.01	0.008	0.368	0.004	0.042	0.006	0.063	0	0.013
cg07696033	0.007	0.015	0.009	0.008	0.013	0.005	0.031	0.593	0.033	0.141	0.033	0.016	0.007	0.013
cg24703804	0.002	0.003	0.004	0.005	0.002	0	0.002	0.139	0.002	0.058	0.001	0	0	0.003
cg06277900	0.01	0.016	0.015	0.01	0.019	0.013	0.07	0.481	0.006	0.046	0.008	0.05	0.019	0.013
cg20686479	0.011	0.031	0.027	0.017	0.031	0.015	0.009	0.505	0.01	0.073	0.004	0.051	0.024	0.019
cg05701676	0.01	0.005	0.003	0.003	0.003	0.007	0.009	0.166	0.007	0.055	0	0	0.004	0.006
cg03919694	0.017	0.065	0.019	0.01	0.035	0.013	0.013	0.568	0.002	0.043	0.002	0.155	0.015	0.006
cg18831738	0.005	0.003	0.007	0.005	0.004	0.006	0.008	0.137	0.003	0.039	0.001	0	0.01	0.005
cg17220042	0.006	0.006	0.007	0.01	0.008	0.005	0.008	0.178	0.005	0.031	0.002	0.007	0.022	0.011
cg10773670	0.053	0.054	0.055	0.046	0.056	0.05	0.055	1	0.041	0.075	0.052	0.068	0.061	0.065
cg12601414	0.004	0.002	0.004	0.005	0.007	0.003	0.012	0.161	0.005	0.046	0.014	0.01	0	0.009
cg08879403	0.006	0.007	0.004	0.009	0.01	0.007	0.019	0.121	0.002	0.057	0	0.002	0.007	0.011
cg10430904	0.004	0.007	0.009	0.009	0.012	0.005	0.005	0.181	0.007	0.057	0	0.008	0.008	0.009
cg24684739	0.01	0.008	0.007	0.005	0.009	0.007	0.009	0.154	0.003	0.054	0	0.003	0.002	0.003
cg20957095	0.006	0.008	0.014	0.011	0.013	0.008	0.029	0.212	0.013	0.079	0.032	0.019	0.008	0.013
cg13195796	0.004	0.009	0.009	0.006	0.005	0.005	0.004	0.145	0.002	0.04	0.012	0	0.011	0.007
cg15256164	0.005	0.005	0.004	0.002	0.003	0.003	0.027	0.225	0.009	0.081	0	0.015	0.006	0.016
cg17547812	0.005	0.007	0.01	0.005	0.005	0.005	0.006	0.124	0.004	0.035	0.004	0.004	0	0.006
cg11702455	0.007	0.007	0.006	0.004	0.007	0.005	0.015	0.195	0.003	0.085	0	0	0.009	0.006
cg02314846	0.003	0.001	0.004	0.003	0.003	0.001	0.003	0.116	0.005	0.068	0	0.001	0	0.001
cg26143326	0.009	0.01	0.011	0.009	0.01	0.008	0.007	0.164	0.013	0.038	0.007	0.002	0.003	0.006
cg23490161	0.137	0.167	0.123	0.185	0.122	0.128	0.283	0.186	0.123	0.45	0.356	0.01	0.019	0.014
cg25147866	0.004	0.005	0.007	0.007	0.005	0.004	0.031	0.165	0.007	0.049	0	0.002	0.006	0.005
cg02925840	0.005	0.007	0.009	0.009	0.006	0.01	0.033	0.158	0.008	0.062	0.027	0.001	0.006	0.012
cg10817500	0.006	0.004	0.006	0.006	0.007	0.007	0.012	0.137	0.009	0.032	0.01	0	0.002	0.01
cg01640606	0.017	0.081	0.022	0.014	0.04	0.011	0.067	0.679	0.046	0.168	0.037	0.042	0	0.01
cg23052830	0.07	0.143	0.066	0.077	0.079	0.072	0.169	0.644	0.08	0.211	0.121	0.096	0.056	0.065
cg02060408	0.002	0.004	0.003	0.003	0.004	0.001	0.009	0.156	0.005	0.074	0	0.007	0.003	0.013
cg03866757	0.005	0.007	0.004	0.006	0.006	0.011	0.019	0.163	0.005	0.053	0.007	0.006	0.001	0.007
cg14162912	0.013	0.01	0.01	0.011	0.015	0.012	0.026	0.247	0.016	0.074	0.011	0	0	0.01
cg27411370	0.003	0.005	0.003	0.001	0.006	0.004	0.018	0.138	0.007	0.053	0.009	0	0.001	0.008
cg26383936	0.005	0.006	0.006	0.004	0.007	0.008	0.012	0.151	0.002	0.045	0.009	0.008	0.002	0.015
cg18944910	0.006	0.005	0.009	0.007	0.005	0.007	0.024	0.177	0.004	0.062	0	0.004	0.016	0.003
cg01531495	0.013	0.011	0.011	0.012	0.007	0.011	0.021	0.14	0.013	0.049	0.013	0.007	0.015	0.011
cg09342320	0.002	0.004	0.003	0.008	0.006	0.008	0.011	0.135	0.013	0.041	0.007	0.004	0.008	0.002
cg07830652	0.036	0.043	0.04	0.035	0.036	0.04	0.075	0.156	0.023	0.082	0.037	0.039	0.075	0.061
cg26567712	0.007	0.006	0.005	0.007	0.005	0.006	0.009	0.13	0.002	0.054	0.006	0	0	0.008
cg27537561	0.004	0.003	0.007	0.007	0.006	0.003	0.008	0.13	0.003	0.061	0	0	0	0.012
cg19689029	0.003	0.003	0.006	0.002	0.005	0.004	0.008	0.116	0.002	0.054	0.002	0.007	0	0.006
cg08904082	0.005	0.004	0.008	0.007	0.01	0.005	0.012	0.145	0.002	0.044	0.003	0.013	0.005	0.01
cg26447968	0.006	0.005	0.009	0.008	0.011	0.009	0	0.172	0.006	0.055	0.003	0.016	0.006	0.018
cg13078969	0.004	0.004	0.005	0.006	0.005	0.003	0.003	0.119	0.006	0.06	0	0	0	0.01
cg21163960	0.014	0.016	0.015	0.011	0.017	0.019	0.065	0.765	0.022	0.422	0.015	0.002	0.03	0.032
cg22115808	0.007	0.009	0.007	0.007	0.01	0.006	0.006	0.129	0.01	0.024	0.006	0	0.011	0.013
cg07805699	0.008	0.006	0.005	0.008	0.006	0.006	0.014	0.167	0.008	0.072	0	0.014	0	0.006
cg25538602	0.006	0.009	0.011	0.006	0.008	0.009	0.006	0.136	0.008	0.036	0.005	0.007	0.006	0.005
cg24891986	0.005	0.007	0.007	0.007	0.005	0.004	0.01	0.159	0.007	0.058	0.012	0.015	0.003	0.005
cg19261559	0.005	0.003	0.007	0.007	0.006	0.004	0.03	0.155	0.006	0.046	0	0.006	0.006	0.014
cg13432616	0.004	0.005	0.006	0.006	0.003	0.007	0.032	0.149	0.006	0.049	0.013	0	0.003	0.003
cg05619888	0.009	0.012	0.008	0.006	0.006	0.007	0.011	0.175	0.008	0.034	0	0.052	0.002	0.006
cg23123540	0.005	0.005	0.005	0.005	0.004	0.004	0.008	0.134	0.015	0.052	0.007	0	0.008	0.005
cg05888082	0.007	0.009	0.009	0.008	0.005	0.004	0.025	0.173	0.003	0.058	0	0.009	0.013	0.011
cg19977964	0.018	0.024	0.021	0.019	0.023	0.021	0.045	0.208	0.039	0.073	0.065	0.03	0.018	0.022
cg21599089	0.003	0.005	0.005	0.005	0.007	0.005	0.008	0.146	0.007	0.05	0	0.02	0.014	0.005
cg24201964	0.008	0.009	0.009	0.01	0.009	0.006	0.011	0.151	0.006	0.055	0	0.006	0.004	0.007
cg07057042	0.008	0.007	0.009	0.004	0.006	0.005	0.022	0.17	0.005	0.089	0	0	0.003	0
cg19990454	0.005	0.008	0.01	0.007	0.007	0.01	0.016	0.188	0.005	0.05	0.021	0.014	0.016	0.007
cg21252276	0.011	0.013	0.013	0.008	0.007	0.015	0.013	0.203	0.008	0.051	0.032	0.004	0.008	0.01
cg22615819	0.002	0.011	0.006	0.005	0.007	0.005	0.01	0.123	0.005	0.06	0	0.006	0.004	0.005
cg09863749	0.005	0.008	0.007	0.008	0.003	0.009	0.034	0.179	0.011	0.065	0.002	0	0.001	0.016
cg06311596	0.004	0.007	0.005	0.007	0.007	0.007	0.007	0.121	0.008	0.044	0.004	0.005	0	0.009
cg27116036	0.006	0.006	0.008	0.011	0.007	0.006	0.022	0.185	0.008	0.053	0.013	0.012	0.005	0.018
cg00591160	0.016	0.023	0.025	0.019	0.025	0.02	0.045	0.241	0.057	0.089	0.068	0.002	0.014	0.024
cg12086936	0.005	0.028	0.018	0.016	0.034	0.009	0.129	0.57	0.044	0.197	0.004	0.039	0.007	0.01
cg06081609	0.003	0.014	0.01	0.008	0.014	0.005	0.001	0.163	0.007	0.068	0	0.017	0.006	0.001
cg09738429	0.008	0.006	0.004	0.004	0.005	0.004	0.021	0.163	0.006	0.061	0	0.003	0.023	0.008
cg04667277	0.004	0.006	0.005	0.01	0.007	0.006	0.006	0.125	0.007	0.052	0.002	0.008	0	0.006
cg22373079	0.004	0.004	0.008	0.008	0.002	0.004	0.025	0.139	0.001	0.064	0.003	0	0.001	0.007
cg14270348	0.01	0.052	0.017	0.007	0.021	0.01	0.021	0.331	0.003	0.023	0.004	0.117	0.019	0.008
cg07346310	0.008	0.024	0.018	0.008	0.018	0.013	0.032	0.258	0.013	0.097	0.006	0.006	0	0.004
cg02685016	0.064	0.159	0.115	0.073	0.159	0.059	0.061	0.35	0.049	0.097	0.037	0.155	0.054	0.043
cg09758623	0.007	0.005	0.003	0.007	0.007	0.005	0.016	0.167	0.004	0.06	0.003	0.01	0.023	0.008
cg23984997	0.012	0.011	0.008	0.009	0.007	0.012	0.021	0.14	0.007	0.078	0	0.003	0.031	0.015
cg13785949	0.003	0.004	0.006	0.005	0.005	0.007	0.015	0.124	0.003	0.059	0	0.005	0	0.005
cg07816687	0.028	0.055	0.043	0.042	0.064	0.032	0.418	0.601	0.009	0.044	0.014	0.063	0.034	0.061
cg05436064	0.006	0.014	0.012	0.007	0.027	0.009	0.308	0.53	0.002	0.061	0.024	0.027	0	0.009
cg09030672	0.069	0.075	0.072	0.067	0.084	0.063	0.362	0.456	0.089	0.118	0.072	0.09	0.072	0.072
cg10805483	0.003	0.005	0.009	0.004	0.006	0.002	0.007	0.128	0.006	0.066	0.004	0	0.008	0.004
cg13219564	0.008	0.007	0.006	0.008	0.006	0.007	0.02	0.145	0.003	0.061	0.001	0.005	0.002	0.004
cg03760927	0.001	0.006	0.009	0.003	0.006	0.004	0.012	0.175	0.008	0.068	0.014	0.035	0	0.001
cg19294256	0.006	0.006	0.006	0.005	0.002	0.006	0.006	0.141	0.006	0.078	0	0.001	0.002	0.011
cg22624253	0.009	0.004	0.004	0.006	0.004	0.004	0.021	0.131	0.008	0.048	0.004	0.009	0	0.006
cg25845331	0.007	0.008	0.011	0.007	0.006	0.011	0.021	0.196	0.014	0.055	0.029	0	0.016	0.009
cg16706559	0.006	0.005	0.007	0.004	0.005	0.003	0.009	0.151	0.003	0.075	0.018	0.004	0	0.008
cg16953106	0.005	0.007	0.009	0.007	0.005	0.006	0.008	0.123	0.008	0.038	0.005	0.013	0.006	0.002
cg20932765	0.007	0.009	0.011	0.007	0.005	0.009	0.014	0.179	0.019	0.063	0.016	0	0.005	0.009
cg26134152	0.011	0.007	0.008	0.008	0.009	0.011	0.014	0.171	0.011	0.05	0.003	0.024	0.001	0.011
cg11858474	0.017	0.013	0.015	0.011	0.013	0.014	0.004	0.186	0.013	0.038	0.003	0.016	0.012	0.015
cg16098780	0.029	0.03	0.036	0.024	0.026	0.032	0.009	0.178	0.029	0.046	0.011	0.024	0.018	0.016
cg06458732	0.008	0.003	0.006	0.004	0.006	0.006	0.009	0.132	0.009	0.055	0.01	0.001	0.009	0.003
cg07235453	0.009	0.008	0.009	0.006	0.009	0.009	0.026	0.17	0.007	0.054	0.006	0.008	0.012	0.007
cg08790212	0.011	0.011	0.012	0.009	0.008	0.008	0.011	0.148	0.005	0.035	0.007	0.014	0.008	0.009
cg20198948	0.039	0.041	0.048	0.042	0.04	0.044	0.045	0.241	0.021	0.09	0.015	0.022	0.052	0.041
cg25845331	0.007	0.008	0.011	0.007	0.006	0.011	0.021	0.196	0.014	0.055	0.029	0	0.016	0.009
cg16706559	0.006	0.005	0.007	0.004	0.005	0.003	0.009	0.151	0.003	0.075	0.018	0.004	0	0.008
cg19260201	0.003	0.005	0.004	0.004	0.004	0.005	0.005	0.117	0.002	0.053	0.009	0.012	0.004	0.007
cg09965679	0.005	0.003	0.002	0.002	0.009	0.005	0.011	0.145	0.004	0.091	0	0.002	0.008	0.005
cg21102739	0.005	0.003	0.003	0.004	0.004	0.003	0.014	0.132	0.011	0.078	0	0	0.007	0.002
cg19183433	0.007	0.007	0.005	0.006	0.007	0.004	0.016	0.117	0.016	0.063	0.092	0.001	0	0.001
cg09022163	0.005	0.007	0.009	0.008	0.011	0.008	0.012	0.134	0.004	0.043	0.004	0.007	0.008	0.011
cg07159484	0.008	0.007	0.008	0.005	0.008	0.005	0.007	0.145	0.012	0.055	0.003	0.023	0.003	0.003
cg03725130	0.006	0.009	0.011	0.007	0.007	0.008	0.014	0.158	0.008	0.032	0.006	0.025	0.014	0.012
cg09360458	0.005	0.006	0.005	0.002	0.009	0.008	0.018	0.192	0.026	0.111	0	0	0.001	0.002
cg19283112	0.045	0.042	0.05	0.043	0.047	0.044	0.044	0.091	0.119	0.164	0.037	0.052	0.046	0.053
cg23076086	0.009	0.009	0.005	0.005	0.004	0.007	0.014	0.138	0.009	0.054	0.01	0.003	0.01	0.003
cg22615819	0.002	0.011	0.006	0.005	0.007	0.005	0.01	0.123	0.005	0.06	0	0.006	0.004	0.005
cg09863749	0.005	0.008	0.007	0.008	0.003	0.009	0.034	0.179	0.011	0.065	0.002	0	0.001	0.016
cg03537301	0.01	0.011	0.012	0.014	0.01	0.011	0.048	0.249	0.003	0.064	0.007	0.027	0.011	0.026
cg04054907	0.008	0.006	0.007	0.004	0.011	0.008	0.012	0.122	0.002	0.057	0	0	0.002	0.006
cg23122401	0.006	0.008	0.008	0.008	0.006	0.005	0.012	0.137	0.003	0.052	0.001	0.009	0.001	0.02
cg09152955	0.005	0.005	0.01	0.006	0.006	0.005	0.026	0.139	0.009	0.053	0.001	0.004	0.003	0.007
cg05250969	0.008	0.005	0.004	0.004	0.004	0.007	0.016	0.156	0.015	0.085	0.003	0.003	0.007	0.004
cg11869215	0.006	0.005	0.003	0.004	0.006	0.005	0.033	0.161	0.014	0.058	0.02	0	0.003	0.007
cg12580870	0.002	0.003	0.005	0.004	0.002	0.003	0.008	0.115	0.005	0.06	0	0.004	0.015	0.007
cg13628971	0.011	0.009	0.008	0.008	0.01	0.009	0.016	0.157	0.005	0.06	0.008	0.005	0.005	0.007
cg04166393	0.007	0.008	0.01	0.009	0.008	0.01	0.003	0.113	0.009	0.078	0.011	0.006	0.019	0.005
cg05662582	0.008	0.011	0.009	0.007	0.01	0.011	0.01	0.177	0.02	0.065	0	0.01	0	0.018
cg09766769	0.008	0.007	0.01	0.01	0.009	0.01	0.006	0.129	0.007	0.033	0	0.003	0.017	0.013
cg12111432	0.003	0.004	0.007	0.006	0.003	0.004	0.012	0.127	0.004	0.056	0.007	0.011	0.003	0.01
cg16033376	0.009	0.014	0.015	0.011	0.011	0.011	0.029	0.164	0.009	0.071	0.012	0.023	0.027	0.036
cg14651505	0.011	0.006	0.009	0.008	0.007	0.008	0.018	0.135	0.002	0.046	0	0.009	0.007	0.009
cg22839729	0.004	0.004	0.006	0.008	0.007	0.006	0	0.132	0.005	0.051	0.013	0	0.015	0.016
cg16449302	0.006	0.008	0.007	0.006	0.007	0.005	0.019	0.127	0.007	0.047	0	0.005	0.004	0.009
cg05401447	0.005	0.005	0.005	0.002	0.005	0.003	0.004	0.042	0.809	0.04	0.034	0.007	0.006	0.009
cg06772157	0.063	0.069	0.073	0.061	0.069	0.067	0.083	0.087	0.424	0.089	0.136	0.1	0.091	0.112
cg22194948	0.005	0.006	0.006	0.005	0.006	0.006	0.004	0.045	0.865	0.032	0.041	0.008	0.031	0.05
cg05330668	0.007	0.007	0.004	0.007	0.008	0.007	0.01	0.1	0.928	0.087	0.098	0.002	0	0.01
cg03577460	0.047	0.044	0.051	0.056	0.059	0.054	0.044	0.299	0.844	0.152	0.16	0.07	0.032	0.048
cg15346168	0.02	0.017	0.048	0.032	0.113	0.019	0.02	0.071	0.83	0.053	0.045	0.025	0.019	0.023
cg25076767	0.009	0.009	0.017	0.011	0.026	0.01	0.009	0.045	0.714	0.047	0.035	0.01	0.037	0.01
cg14149007	0.005	0.006	0.006	0.008	0.008	0.004	0.012	0.091	0.853	0.045	0.146	0.015	0.014	0.015
cg23864632	0.009	0.01	0.008	0.008	0.008	0.009	0.019	0.107	0.619	0.044	0.051	0.014	0	0.008
cg18021161	0.008	0.013	0.013	0.011	0.025	0.013	0.026	0.094	0.743	0.078	0.039	0.016	0.031	0.029
cg24740818	0.075	0.08	0.087	0.097	0.108	0.065	0.171	0.295	0.826	0.347	0.264	0.069	0.314	0.187
cg08557928	0.011	0.012	0.017	0.013	0.023	0.015	0.04	0.112	0.523	0.079	0.029	0.016	0.021	0.024
cg24940138	0.011	0.018	0.017	0.016	0.013	0.015	0.018	0.091	0.958	0.06	0.515	0.025	0.054	0.086
cg21211480	0.006	0.004	0.007	0.005	0.005	0.005	0.014	0.074	0.94	0.035	0.388	0.008	0.009	0.028
cg15026277	0.006	0.004	0.006	0.007	0.005	0.007	0.014	0.069	0.921	0.039	0.319	0.006	0	0.03
cg12471950	0.075	0.089	0.096	0.08	0.076	0.088	0.085	0.156	0.63	0.124	0.202	0.102	0.227	0.096
cg05122965	0.012	0.017	0.014	0.013	0.012	0.016	0.022	0.081	0.746	0.041	0.118	0.014	0.059	0.018
cg01799588	0.044	0.039	0.036	0.042	0.039	0.039	0.053	0.075	0.663	0.081	0.22	0.07	0.396	0.084
cg15346168	0.02	0.017	0.048	0.032	0.113	0.019	0.02	0.071	0.83	0.053	0.045	0.025	0.019	0.023
cg25076767	0.009	0.009	0.017	0.011	0.026	0.01	0.009	0.045	0.714	0.047	0.035	0.01	0.037	0.01
cg26705574	0.103	0.067	0.105	0.127	0.175	0.095	0.059	0.065	0.731	0.067	0.241	0.147	0.046	0.076
cg24940138	0.011	0.018	0.017	0.016	0.013	0.015	0.018	0.091	0.958	0.06	0.515	0.025	0.054	0.086
cg21211480	0.006	0.004	0.007	0.005	0.005	0.005	0.014	0.074	0.94	0.035	0.388	0.008	0.009	0.028
cg15026277	0.006	0.004	0.006	0.007	0.005	0.007	0.014	0.069	0.921	0.039	0.319	0.006	0	0.03
cg19548479	0.034	0.035	0.039	0.034	0.036	0.034	0.05	0.089	0.895	0.088	0.348	0.041	0.056	0.09
cg22125968	0.004	0.005	0.007	0.004	0.005	0.004	0.014	0.007	0.492	0.146	0.05	0.021	0.017	0.032
cg01536987	0.011	0.011	0.012	0.009	0.011	0.011	0.017	0.073	0.516	0.21	0.076	0.054	0.048	0.083
cg22437153	0.032	0.041	0.035	0.03	0.038	0.028	0.033	0.051	0.84	0.099	0.065	0.052	0.058	0.035
cg15006396	0.025	0.021	0.021	0.023	0.018	0.025	0.02	0.063	0.629	0.072	0.076	0.032	0.029	0.021
cg08230695	0.026	0.024	0.026	0.026	0.024	0.023	0.03	0.116	0.826	0.048	0.132	0.024	0.053	0.037
cg19105122	0.012	0.011	0.011	0.007	0.01	0.013	0.01	0.076	0.497	0.036	0.133	0.007	0.014	0.018
cg26721700	0.02	0.02	0.021	0.017	0.014	0.016	0.029	0.153	0.422	0.087	0.066	0.011	0.023	0.031
cg09386954	0.01	0.009	0.009	0.008	0.007	0.009	0.008	0.149	0.488	0.06	0.067	0.004	0	0.019
cg17445840	0.017	0.016	0.033	0.028	0.036	0.02	0.025	0.055	0.83	0.064	0.187	0.004	0.072	0.06
cg18021161	0.008	0.013	0.013	0.011	0.025	0.013	0.026	0.094	0.743	0.078	0.039	0.016	0.031	0.029
cg24740818	0.075	0.08	0.087	0.097	0.108	0.065	0.171	0.295	0.826	0.347	0.264	0.069	0.314	0.187
cg08557928	0.011	0.012	0.017	0.013	0.023	0.015	0.04	0.112	0.523	0.079	0.029	0.016	0.021	0.024
cg26763284	0.001	0.005	0.007	0.005	0.005	0.005	0.012	0.069	0.263	0.037	0.015	0.041	0.004	0.006
cg02921887	0.011	0.021	0.014	0.006	0.016	0.01	0.012	0.124	0.62	0.087	0.162	0.03	0	0.005
cg04951797	0.075	0.115	0.124	0.05	0.135	0.058	0.341	0.387	0.763	0.187	0.557	0.101	0.06	0.041
cg15769424	0.008	0.011	0.022	0.008	0.028	0.01	0.018	0.108	0.424	0.071	0.012	0.031	0.004	0.014
cg23257604	0.013	0.03	0.025	0.014	0.033	0.021	0.017	0.073	0.423	0.076	0.017	0.01	0.006	0.019
cg24008544	0.02	0.022	0.018	0.014	0.024	0.017	0.013	0.059	0.941	0.037	0.475	0.03	0.013	0.047
cg03049782	0.05	0.054	0.051	0.045	0.053	0.051	0.054	0.065	0.896	0.078	0.486	0.083	0.06	0.12
cg16860694	0.015	0.016	0.016	0.017	0.018	0.022	0.032	0.127	0.527	0.051	0.05	0.033	0.03	0.034
cg11260421	0.018	0.021	0.022	0.019	0.017	0.018	0.031	0.11	0.348	0.06	0.045	0.021	0.034	0.032
cg10227705	0.013	0.024	0.03	0.026	0.016	0.024	0.049	0.165	0.479	0.086	0.029	0.017	0.036	0.027
cg26385074	0.002	0.033	0.013	0.006	0.031	0.003	0.004	0.084	0.787	0.032	0.268	0.074	0.002	0.148
cg16559708	0.03	0.036	0.037	0.029	0.037	0.029	0.012	0.056	0.544	0.078	0.047	0.031	0.033	0.032
cg02458945	0.002	0.06	0.02	0.003	0.037	0.003	0.004	0.05	0.339	0.035	0.033	0.049	0.007	0.006
cg22409276	0.003	0.005	0.005	0.004	0.006	0.004	0.011	0.052	0.443	0.033	0.115	0.071	0.006	0.088
cg22752023	0.052	0.142	0.088	0.045	0.071	0.049	0.043	0.072	0.871	0.075	0.11	0.135	0.161	0.094
cg07931714	0.038	0.063	0.04	0.034	0.036	0.037	0.043	0.058	0.839	0.061	0.091	0.089	0.102	0.069
cg08543966	0.01	0.012	0.011	0.011	0.009	0.009	0.028	0.083	0.756	0.05	0.269	0.03	0.034	0.131
cg23575320	0.03	0.045	0.046	0.041	0.058	0.027	0.03	0.095	0.775	0.085	0.093	0.055	0.035	0.069
cg18238858	0.048	0.056	0.051	0.052	0.044	0.049	0.066	0.078	0.306	0.069	0.133	0.083	0.072	0.079
cg14023023	0.029	0.028	0.028	0.027	0.027	0.029	0.038	0.063	0.739	0.061	0.182	0.053	0.047	0.071
cg15524063	0.004	0.006	0.003	0.002	0.004	0.005	0.009	0.057	0.457	0.031	0.106	0.01	0.037	0.192
cg25385412	0.003	0.004	0.007	0.004	0.004	0.002	0.01	0.059	0.428	0.031	0.186	0.012	0.006	0.071
cg26090652	0.022	0.051	0.055	0.033	0.07	0.019	0.028	0.11	0.706	0.079	0.066	0.081	0.025	0.023
cg25678052	0.01	0.011	0.009	0.011	0.009	0.01	0.011	0.06	0.291	0.025	0.04	0.012	0.011	0.059
cg18222083	0.009	0.011	0.009	0.008	0.007	0.012	0.012	0.083	0.967	0.057	0.613	0.016	0.019	0.067
cg14138132	0.035	0.042	0.042	0.042	0.034	0.039	0.05	0.133	0.797	0.07	0.141	0.026	0.065	0.044
cg01855735	0.038	0.054	0.05	0.048	0.052	0.048	0.066	0.125	0.693	0.115	0.068	0.048	0.047	0.046
cg26284390	0.03	0.034	0.044	0.039	0.048	0.04	0.035	0.119	0.753	0.122	0.093	0.045	0.029	0.041
cg01987417	0.01	0.023	0.02	0.014	0.022	0.01	0.011	0.062	0.522	0.042	0.077	0.088	0.026	0.1
cg06537680	0.018	0.028	0.02	0.019	0.032	0.019	0.028	0.074	0.509	0.057	0.064	0.085	0.032	0.02
cg24940138	0.011	0.018	0.017	0.016	0.013	0.015	0.018	0.091	0.958	0.06	0.515	0.025	0.054	0.086
cg21211480	0.006	0.004	0.007	0.005	0.005	0.005	0.014	0.074	0.94	0.035	0.388	0.008	0.009	0.028
cg15026277	0.006	0.004	0.006	0.007	0.005	0.007	0.014	0.069	0.921	0.039	0.319	0.006	0	0.03
cg19548479	0.034	0.035	0.039	0.034	0.036	0.034	0.05	0.089	0.895	0.088	0.348	0.041	0.056	0.09
cg07323350	0.023	0.032	0.028	0.023	0.028	0.028	0.052	0.128	0.465	0.089	0.062	0.024	0.033	0.036
cg10164300	0.021	0.037	0.034	0.022	0.041	0.019	0.058	0.085	0.453	0.116	0.081	0.035	0.044	0.027
cg20554488	0.025	0.024	0.025	0.022	0.031	0.012	0.029	0.086	0.545	0.128	0.069	0.035	0.028	0.022
cg09109996	0.043	0.042	0.045	0.035	0.049	0.044	0.033	0.086	0.528	0.144	0.094	0.101	0.052	0.048
cg19258183	0.064	0.08	0.074	0.083	0.089	0.057	0.089	0.17	0.525	0.144	0.096	0.063	0.089	0.083
cg18732064	0.033	0.005	0.006	0.003	0.005	0.031	0.022	0.082	0.732	0.199	0.142	0.119	0.016	0.06
cg23275502	0.009	0.011	0.008	0.009	0.009	0.013	0.016	0.065	0.246	0.037	0.04	0.01	0.005	0.018
cg23696132	0.01	0.011	0.016	0.011	0.014	0.015	0.017	0.098	0.317	0.039	0.059	0.002	0.019	0.013
cg15524063	0.004	0.006	0.003	0.002	0.004	0.005	0.009	0.057	0.457	0.031	0.106	0.01	0.037	0.192
cg25385412	0.003	0.004	0.007	0.004	0.004	0.002	0.01	0.059	0.428	0.031	0.186	0.012	0.006	0.071
cg12293340	0.006	0.009	0.01	0.007	0.008	0.007	0.013	0.089	0.278	0.032	0.037	0.009	0.031	0.033
cg04658027	0.011	0.017	0.012	0.012	0.011	0.01	0.018	0.06	0.59	0.036	0.307	0.04	0.046	0.051
cg09887589	0.053	0.052	0.056	0.052	0.05	0.051	0.058	0.065	0.627	0.087	0.333	0.113	0.153	0.106
cg24940138	0.011	0.018	0.017	0.016	0.013	0.015	0.018	0.091	0.958	0.06	0.515	0.025	0.054	0.086
cg21211480	0.006	0.004	0.007	0.005	0.005	0.005	0.014	0.074	0.94	0.035	0.388	0.008	0.009	0.028
cg19548479	0.034	0.035	0.039	0.034	0.036	0.034	0.05	0.089	0.895	0.088	0.348	0.041	0.056	0.09
cg21035368	0.024	0.028	0.071	0.029	0.055	0.032	0.038	0.067	0.65	0.087	0.139	0.033	0.033	0.075
cg18643762	0.007	0.009	0.028	0.011	0.029	0.01	0.012	0.086	0.37	0.038	0.094	0.039	0.013	0.029
cg04749104	0.033	0.037	0.07	0.03	0.068	0.033	0.096	0.091	0.43	0.065	0.172	0.088	0.046	0.132
cg16094412	0.005	0.01	0.009	0.006	0.008	0.008	0.015	0.066	0.495	0.26	0.039	0.057	0.022	0.041
cg06415864	0.025	0.027	0.028	0.028	0.025	0.024	0.035	0.057	0.495	0.082	0.084	0.03	0.055	0.045
cg00777968	0.017	0.01	0.015	0.014	0.017	0.017	0.019	0.051	0.375	0.043	0.15	0.013	0.018	0.029
cg20287074	0.044	0.04	0.041	0.051	0.048	0.039	0.055	0.096	0.764	0.115	0.128	0.054	0.067	0.065
cg04614173	0.004	0.004	0.002	0.002	0.005	0.003	0.009	0.044	0.12	0.033	0.02	0.005	0	0.003
cg17069739	0.027	0.027	0.032	0.021	0.03	0.029	0.043	0.051	0.543	0.069	0.142	0.062	0.031	0.047
cg25588725	0.069	0.064	0.061	0.071	0.061	0.071	0.08	0.115	0.673	0.112	0.201	0.088	0.094	0.09
cg08384913	0.035	0.054	0.044	0.051	0.04	0.034	0.031	0.104	0.78	0.09	0.25	0.049	0.06	0.038
cg13601517	0.043	0.069	0.052	0.039	0.059	0.049	0.07	0.136	0.845	0.112	0.109	0.063	0.077	0.075
cg16860694	0.015	0.016	0.016	0.017	0.018	0.022	0.032	0.127	0.527	0.051	0.05	0.033	0.03	0.034
cg11260421	0.018	0.021	0.022	0.019	0.017	0.018	0.031	0.11	0.348	0.06	0.045	0.021	0.034	0.032
cg10227705	0.013	0.024	0.03	0.026	0.016	0.024	0.049	0.165	0.479	0.086	0.029	0.017	0.036	0.027
cg16938490	0.006	0.01	0.007	0.008	0.006	0.007	0.013	0.072	0.289	0.044	0.084	0.056	0.01	0.006
cg12930573	0.015	0.029	0.022	0.021	0.014	0.018	0.024	0.095	0.153	0.086	0.086	0.05	0.025	0.032
cg02238826	0.033	0.04	0.036	0.033	0.03	0.028	0.054	0.087	0.464	0.12	0.206	0.092	0.03	0.04
cg19025031	0.014	0.083	0.071	0.043	0.068	0.026	0.028	0.081	0.521	0.043	0.041	0.045	0.023	0.028
cg07652350	0.007	0.009	0.006	0.01	0.005	0.009	0.015	0.127	0.511	0.169	0.16	0	0.03	0.034
cg12258919	0.005	0.009	0.006	0.004	0.006	0.006	0.009	0.084	0.234	0.041	0.008	0.07	0.013	0.01
cg01855735	0.038	0.054	0.05	0.048	0.052	0.048	0.066	0.125	0.693	0.115	0.068	0.048	0.047	0.046
cg26284390	0.03	0.034	0.044	0.039	0.048	0.04	0.035	0.119	0.753	0.122	0.093	0.045	0.029	0.041
cg10652650	0.039	0.042	0.042	0.037	0.035	0.039	0.042	0.059	0.801	0.075	0.106	0.07	0.225	0.123
cg14280424	0.014	0.015	0.016	0.017	0.017	0.014	0.016	0.06	0.604	0.355	0.072	0.005	0.056	0.046
cg23477967	0.022	0.041	0.041	0.022	0.05	0.018	0.034	0.092	0.774	0.085	0.117	0.027	0.303	0.054
cg13484549	0.009	0.026	0.029	0.008	0.05	0.014	0.034	0.145	0.553	0.18	0.086	0.039	0.01	0.018
cg03559454	0.063	0.088	0.099	0.064	0.119	0.062	0.078	0.094	0.405	0.206	0.189	0.172	0.082	0.106
cg21185826	0.012	0.023	0.015	0.015	0.014	0.013	0.015	0.115	0.734	0.306	0.26	0.037	0.014	0.022
cg03988119	0.027	0.024	0.025	0.031	0.024	0.029	0.026	0.091	0.467	0.116	0.067	0.011	0.045	0.034
cg25266135	0.017	0.016	0.02	0.015	0.015	0.015	0.016	0.056	0.303	0.042	0.073	0.015	0.026	0.034
cg23433889	0.003	0.002	0.003	0.005	0.004	0.005	0.006	0.081	0.178	0.04	0.021	0.011	0.002	0.031
cg17297071	0.022	0.026	0.02	0.025	0.022	0.024	0.028	0.1	0.435	0.097	0.158	0.035	0.032	0.093
cg11716106	0.014	0.021	0.019	0.018	0.025	0.014	0.027	0.126	0.911	0.163	0.406	0.101	0.061	0.095
cg26721700	0.02	0.02	0.021	0.017	0.014	0.016	0.029	0.153	0.422	0.087	0.066	0.011	0.023	0.031
cg09386954	0.01	0.009	0.009	0.008	0.007	0.009	0.008	0.149	0.488	0.06	0.067	0.004	0	0.019
cg22618240	0.039	0.043	0.043	0.04	0.043	0.036	0.042	0.078	0.364	0.089	0.069	0.061	0.061	0.047
cg22125968	0.004	0.005	0.007	0.004	0.005	0.004	0.014	0.007	0.492	0.146	0.05	0.021	0.017	0.032
cg01536987	0.011	0.011	0.012	0.009	0.011	0.011	0.017	0.073	0.516	0.21	0.076	0.054	0.048	0.083
cg23320056	0.082	0.09	0.086	0.108	0.082	0.092	0.095	0.115	0.683	0.122	0.349	0.111	0.154	0.281
cg20465207	0.028	0.038	0.03	0.032	0.035	0.033	0.042	0.074	0.556	0.09	0.079	0.042	0.053	0.102
cg05032848	0.042	0.059	0.047	0.043	0.05	0.039	0.147	0.102	0.721	0.099	0.084	0.076	0.089	0.08
cg18710162	0.042	0.04	0.04	0.036	0.034	0.044	0.118	0.085	0.677	0.076	0.076	0.067	0.093	0.086
cg05873285	0.014	0.01	0.01	0.008	0.008	0.011	0.007	0.081	0.198	0.044	0.024	0.008	0.007	0.013
cg09146577	0.033	0.032	0.031	0.025	0.03	0.022	0.031	0.093	0.421	0.08	0.047	0.022	0.042	0.032
cg16754364	0.023	0.026	0.024	0.017	0.022	0.023	0.025	0.063	0.458	0.182	0.052	0.022	0.032	0.056
cg03693515	0.043	0.045	0.047	0.041	0.05	0.05	0.051	0.078	0.495	0.109	0.074	0.1	0.063	0.059
cg21295467	0.027	0.029	0.025	0.025	0.03	0.025	0.028	0.055	0.494	0.081	0.166	0.057	0.028	0.037
cg23735296	0.025	0.029	0.027	0.033	0.038	0.03	0.03	0.07	0.331	0.089	0.082	0.042	0.025	0.025
cg13622821	0.031	0.03	0.025	0.025	0.028	0.027	0.043	0.055	0.526	0.056	0.231	0.046	0.025	0.037
cg09292875	0.039	0.047	0.03	0.041	0.025	0.033	0.052	0.187	0.657	0.107	0.079	0.074	0.03	0.084
cg25939213	0.047	0.049	0.053	0.044	0.045	0.048	0.057	0.072	0.353	0.103	0.077	0.082	0.061	0.076
cg16079358	0.097	0.095	0.098	0.099	0.089	0.088	0.119	0.145	0.471	0.179	0.209	0.13	0.1	0.115
cg07323350	0.023	0.032	0.028	0.023	0.028	0.028	0.052	0.128	0.465	0.089	0.062	0.024	0.033	0.036
cg10164300	0.021	0.037	0.034	0.022	0.041	0.019	0.058	0.085	0.453	0.116	0.081	0.035	0.044	0.027
cg20554488	0.025	0.024	0.025	0.022	0.031	0.012	0.029	0.086	0.545	0.128	0.069	0.035	0.028	0.022
cg09109996	0.043	0.042	0.045	0.035	0.049	0.044	0.033	0.086	0.528	0.144	0.094	0.101	0.052	0.048
cg09994724	0.046	0.047	0.041	0.041	0.041	0.042	0.051	0.101	0.333	0.126	0.088	0.065	0.038	0.05
cg23735296	0.025	0.029	0.027	0.033	0.038	0.03	0.03	0.07	0.331	0.089	0.082	0.042	0.025	0.025
cg14215748	0.025	0.027	0.017	0.021	0.016	0.028	0.028	0.119	0.53	0.104	0.101	0.02	0.123	0.043
cg16520288	0.01	0.024	0.017	0.012	0.018	0.011	0.055	0.155	0.743	0.496	0.071	0.034	0.015	0.026
cg09018861	0.01	0.019	0.009	0.016	0.012	0.008	0.015	0.077	0.388	0.06	0.057	0.037	0.143	0.029
cg08659394	0.007	0.02	0.012	0.008	0.017	0.008	0.013	0.059	0.42	0.039	0.203	0.108	0.022	0.02
cg06212637	0.049	0.074	0.068	0.088	0.087	0.049	0.068	0.116	0.372	0.1	0.147	0.127	0.046	0.075
cg16860694	0.015	0.016	0.016	0.017	0.018	0.022	0.032	0.127	0.527	0.051	0.05	0.033	0.03	0.034
cg11260421	0.018	0.021	0.022	0.019	0.017	0.018	0.031	0.11	0.348	0.06	0.045	0.021	0.034	0.032
cg10227705	0.013	0.024	0.03	0.026	0.016	0.024	0.049	0.165	0.479	0.086	0.029	0.017	0.036	0.027
cg14607407	0.041	0.05	0.051	0.048	0.046	0.044	0.05	0.072	0.705	0.157	0.112	0.088	0.075	0.076
cg24208375	0.041	0.047	0.052	0.048	0.046	0.05	0.059	0.105	0.657	0.066	0.167	0.035	0.059	0.079
cg13495235	0.004	0.007	0.006	0.008	0.009	0.007	0.016	0.183	0.73	0.389	0.248	0.004	0.014	0.055
cg26930816	0.038	0.049	0.042	0.038	0.037	0.033	0.059	0.1	0.892	0.376	0.143	0.057	0.069	0.121
cg22752023	0.052	0.142	0.088	0.045	0.071	0.049	0.043	0.072	0.871	0.075	0.11	0.135	0.161	0.094
cg07931714	0.038	0.063	0.04	0.034	0.036	0.037	0.043	0.058	0.839	0.061	0.091	0.089	0.102	0.069
cg00734592	0.049	0.046	0.048	0.048	0.045	0.045	0.062	0.066	0.794	0.09	0.279	0.084	0.075	0.102
cg05330668	0.007	0.007	0.004	0.007	0.008	0.007	0.01	0.1	0.928	0.087	0.098	0.002	0	0.01
cg03577460	0.047	0.044	0.051	0.056	0.059	0.054	0.044	0.299	0.844	0.152	0.16	0.07	0.032	0.048
cg05032848	0.042	0.059	0.047	0.043	0.05	0.039	0.147	0.102	0.721	0.099	0.084	0.076	0.089	0.08
cg18710162	0.042	0.04	0.04	0.036	0.034	0.044	0.118	0.085	0.677	0.076	0.076	0.067	0.093	0.086
cg04855748	0.053	0.068	0.06	0.053	0.066	0.051	0.12	0.185	0.57	0.716	0.224	0.175	0.061	0.076
cg09675196	0.005	0.003	0.004	0.004	0.003	0.004	0.033	0.058	0.637	0.597	0.13	0.001	0.002	0.005
cg18383813	0.051	0.052	0.047	0.05	0.05	0.046	0.159	0.115	0.46	0.409	0.21	0.084	0.074	0.123
cg00586365	0.007	0.006	0.006	0.007	0.006	0.008	0.009	0.006	0.004	0.867	0.001	0.018	0.006	0.005
cg25475603	0.009	0.009	0.011	0.011	0.009	0.011	0.02	0.054	0.005	0.85	0.005	0.027	0.022	0.013
cg04504441	0.011	0.018	0.014	0.011	0.021	0.012	0.024	0.148	0.008	0.933	0.007	0.058	0.02	0.013
cg03384979	0.007	0.009	0.006	0.006	0.005	0.005	0.021	0.095	0.03	0.825	0.014	0.017	0.04	0.025
cg20367421	0.004	0.003	0.004	0.003	0.005	0.005	0.007	0.011	0.012	0.741	0.007	0.018	0.007	0.003
cg13530621	0.002	0.002	0.003	0.004	0.002	0.002	0.005	0.051	0.003	0.832	0.001	0.028	0.003	0.004
cg12060306	0.005	0.011	0.006	0.003	0.008	0.002	0.001	0.053	0.006	0.917	0	0.009	0.006	0.006
cg25765619	0.052	0.055	0.055	0.053	0.053	0.056	0.056	0.156	0.063	0.72	0.068	0.067	0.074	0.072
cg18251612	0.001	0.005	0.005	0.004	0.006	0.003	0.013	0.039	0.004	0.938	0.006	0.013	0.011	0.009
cg03384979	0.007	0.009	0.006	0.006	0.005	0.005	0.021	0.095	0.03	0.825	0.014	0.017	0.04	0.025
cg17049889	0.008	0.009	0.012	0.009	0.007	0.009	0.013	0.092	0.009	0.855	0.004	0.032	0.017	0.01
cg20367421	0.004	0.003	0.004	0.003	0.005	0.005	0.007	0.011	0.012	0.741	0.007	0.018	0.007	0.003
cg13530621	0.002	0.002	0.003	0.004	0.002	0.002	0.005	0.051	0.003	0.832	0.001	0.028	0.003	0.004
cg05771701	0.003	0.004	0.002	0.003	0.003	0.004	0.008	0.048	0.004	0.926	0.01	0.013	0.011	0.007
cg19614698	0.004	0.02	0.004	0.002	0.004	0.003	0.005	0.046	0.001	0.908	0.003	0.019	0.003	0.005
cg10589249	0.003	0.002	0.003	0.004	0.003	0.001	0.003	0.044	0.007	0.827	0.014	0.019	0.004	0.003
cg14576565	0.003	0.006	0.004	0.002	0.005	0.006	0.015	0.071	0.005	0.792	0	0.006	0.007	0.011
cg08539841	0.004	0.011	0.002	0.005	0.01	0.003	0.003	0.064	0.02	0.898	0	0.01	0.01	0.003
cg24487076	0.023	0.033	0.028	0.022	0.034	0.023	0.03	0.1	0.02	0.875	0.03	0.04	0.041	0.034
cg13882278	0.018	0.048	0.028	0.026	0.042	0.02	0.035	0.099	0.039	0.9	0.049	0.053	0.037	0.028
cg08704681	0.002	0.005	0.001	0.001	0.003	0.002	0	0.035	0.039	0.755	0.018	0	0	0.001
cg15974272	0.004	0.003	0.002	0.003	0.003	0.002	0.008	0.067	0.003	0.858	0	0.022	0	0.006
cg18782736	0.003	0.003	0.005	0.004	0.003	0.004	0.01	0.056	0.007	0.926	0	0.021	0	0.018
cg19337852	0.001	0.002	0.003	0.003	0.006	0.003	0.008	0.061	0.005	0.971	0	0.047	0.003	0.002
cg15375239	0.002	0.003	0.004	0.007	0.014	0.004	0.009	0.072	0.002	0.96	0	0.065	0.001	0.005
cg04628008	0.003	0.012	0.004	0.004	0.007	0.004	0.011	0.054	0.004	0.908	0.008	0.017	0.003	0.004
cg00275232	0.002	0.003	0.007	0.003	0.001	0.002	0.008	0.063	0.009	0.8	0.005	0.009	0.003	0.005
cg00922376	0.003	0.007	0.003	0.002	0.004	0.005	0.015	0.075	0.002	0.912	0	0.006	0.004	0.011
cg09765994	0.025	0.03	0.025	0.027	0.025	0.028	0.056	0.1	0.01	0.618	0.01	0.03	0.05	0.045
cg07596209	0.005	0.009	0.011	0.01	0.009	0.009	0.024	0.066	0.007	0.32	0.009	0.007	0.019	0.013
cg15686800	0.004	0.003	0.003	0.003	0.003	0.004	0.006	0.085	0.001	0.904	0	0.02	0	0.006
cg00113554	0.04	0.042	0.038	0.038	0.04	0.042	0.052	0.089	0.034	0.386	0.048	0.065	0.045	0.049
cg27420520	0.002	0.006	0.006	0.003	0.002	0.004	0.002	0.076	0.005	0.937	0.005	0.023	0.01	0.006
cg02246645	0.05	0.048	0.055	0.052	0.048	0.052	0.059	0.113	0.057	0.636	0.063	0.076	0.072	0.052
cg16818909	0.004	0.006	0.004	0.007	0.007	0.001	0.004	0.007	0.007	0.517	0.001	0.016	0.011	0.006
cg06187843	0.044	0.054	0.06	0.051	0.052	0.062	0.045	0.123	0.012	0.635	0.017	0.12	0.075	0.063
cg08539841	0.004	0.011	0.002	0.005	0.01	0.003	0.003	0.064	0.02	0.898	0	0.01	0.01	0.003
cg24487076	0.023	0.033	0.028	0.022	0.034	0.023	0.03	0.1	0.02	0.875	0.03	0.04	0.041	0.034
cg13882278	0.018	0.048	0.028	0.026	0.042	0.02	0.035	0.099	0.039	0.9	0.049	0.053	0.037	0.028
cg08704681	0.002	0.005	0.001	0.001	0.003	0.002	0	0.035	0.039	0.755	0.018	0	0	0.001
cg06974871	0.008	0.008	0.008	0.007	0.01	0.007	0.01	0.058	0.005	0.933	0.006	0.009	0	0.017
cg05064297	0.002	0.004	0.005	0.007	0.005	0.004	0.008	0.075	0.005	0.9	0	0.023	0.004	0.006
cg10884052	0.007	0.005	0.008	0.006	0.009	0.005	0.005	0.09	0.007	0.923	0.008	0.005	0	0
cg18607529	0.004	0.005	0.005	0.007	0.007	0.007	0.011	0.054	0.014	0.922	0.007	0.009	0.015	0.011
cg07589773	0.054	0.064	0.064	0.067	0.054	0.063	0.079	0.183	0.041	0.772	0.059	0.054	0.064	0.078
cg27243389	0.039	0.04	0.054	0.053	0.066	0.044	0.049	0.137	0.029	0.887	0.021	0.036	0.062	0.059
cg05026102	0.006	0.007	0.011	0.01	0.022	0.008	0.015	0.009	0.022	0.917	0.017	0.01	0.007	0.01
cg22716984	0.005	0.005	0.007	0.006	0.005	0.006	0.012	0.056	0.002	0.825	0.006	0.016	0.005	0.009
cg09334331	0.002	0.006	0.004	0.005	0.005	0.003	0.01	0.057	0.004	0.67	0.006	0.004	0.004	0.005
cg12217400	0.005	0.02	0.011	0.007	0.017	0.006	0.009	0.052	0.023	0.596	0.026	0.083	0.007	0.005
cg15490715	0.007	0.018	0.01	0.005	0.027	0.005	0.007	0.015	0.006	0.95	0	0.05	0.002	0.009
cg06613392	0.013	0.043	0.032	0.02	0.066	0.013	0.022	0.11	0.007	0.881	0.023	0.082	0.004	0.018
cg00370229	0.01	0.035	0.023	0.016	0.04	0.017	0.019	0.078	0.008	0.821	0	0.155	0.036	0.024
cg13080626	0.003	0.004	0.001	0.005	0.004	0.003	0.004	0.061	0.006	0.632	0.004	0.007	0.001	0.006
cg01297191	0.008	0.006	0.011	0.008	0.01	0.007	0.01	0.098	0.006	0.914	0.005	0	0.005	0.011
cg02096916	0.007	0.006	0.009	0.008	0.011	0.008	0.005	0.073	0.004	0.932	0.005	0.01	0.006	0.012
cg03315007	0.001	0.001	0.001	0.001	0.001	0.001	0.005	0.051	0.03	0.963	0.001	0.004	0.004	0.068
cg18064474	0.002	0.004	0.004	0.007	0.003	0.004	0.01	0.064	0.003	0.75	0.002	0.022	0.004	0.003
cg08871855	0.025	0.034	0.04	0.027	0.028	0.036	0.053	0.185	0.05	0.8	0.036	0.04	0.046	0.034
cg23511613	0.004	0.009	0.006	0.004	0.007	0.003	0.011	0.042	0.005	0.896	0	0.051	0.005	0.01
cg10589249	0.003	0.002	0.003	0.004	0.003	0.001	0.003	0.044	0.007	0.827	0.014	0.019	0.004	0.003
cg14576565	0.003	0.006	0.004	0.002	0.005	0.006	0.015	0.071	0.005	0.792	0	0.006	0.007	0.011
cg21353292	0.003	0.009	0.005	0.004	0.006	0.004	0.013	0.061	0.01	0.938	0.016	0.033	0	0.003
cg00620449	0.005	0.008	0.006	0.007	0.008	0.007	0.01	0.091	0.002	0.918	0.002	0.001	0.01	0.009
cg09483904	0.022	0.026	0.03	0.028	0.025	0.023	0.028	0.187	0.07	0.627	0.068	0.028	0.037	0.029
cg14460343	0.002	0.004	0.002	0.003	0.004	0.005	0.004	0.082	0.001	0.731	0.006	0.019	0.001	0.001
cg12998491	0.003	0.003	0.003	0.002	0.003	0.003	0.006	0.058	0.005	0.563	0.004	0.012	0	0
cg24713878	0.004	0.004	0.004	0.003	0.005	0.003	0.005	0.037	0.001	0.451	0	0.012	0.002	0.002
cg12316865	0.002	0.005	0.005	0.005	0.005	0.004	0.014	0.052	0.005	0.322	0.004	0.002	0.003	0.004
cg17374534	0.006	0.006	0.007	0.004	0.005	0.005	0.011	0.05	0.004	0.719	0	0.019	0.007	0.007
cg06369090	0.009	0.023	0.013	0.011	0.014	0.009	0.009	0.067	0.016	0.758	0.009	0.038	0.009	0.007
cg07337234	0.002	0.005	0.003	0.004	0.004	0.004	0.006	0.072	0.004	0.667	0.004	0.009	0.004	0.002
cg25532501	0.006	0.016	0.006	0.004	0.008	0.002	0.008	0.072	0.013	0.939	0.005	0.027	0.002	0.004
cg11781389	0.057	0.101	0.054	0.065	0.063	0.05	0.065	0.208	0.05	0.817	0.036	0.125	0.067	0.041
cg06873316	0.041	0.117	0.069	0.042	0.091	0.033	0.023	0.192	0.011	0.808	0.015	0.123	0.019	0.021
cg14749465	0.004	0.028	0.009	0.006	0.01	0.002	0	0.042	0.017	0.853	0.01	0.029	0	0.003
cg23977631	0.021	0.022	0.022	0.018	0.025	0.015	0.036	0.122	0.005	0.668	0.002	0.082	0.038	0.028
cg14997226	0.004	0.006	0.005	0.007	0.005	0.005	0.002	0.039	0.006	0.518	0.003	0.004	0.005	0.004
cg13652513	0.003	0.004	0.005	0.005	0.004	0.003	0.01	0.043	0.005	0.646	0.008	0.014	0.011	0.007
cg04140862	0.043	0.04	0.039	0.038	0.046	0.035	0.038	0.086	0.035	0.469	0.028	0.069	0.065	0.037
cg13070215	0.004	0.004	0.004	0.004	0.004	0.005	0.014	0.085	0.006	0.937	0.002	0.04	0.004	0.004
cg18153124	0.047	0.046	0.052	0.045	0.047	0.047	0.058	0.103	0.052	0.438	0.089	0.097	0.064	0.062
cg19134704	0.083	0.086	0.094	0.075	0.078	0.075	0.11	0.173	0.099	0.67	0.095	0.107	0.063	0.083
cg19664267	0.008	0.01	0.009	0.009	0.009	0.008	0.009	0.224	0.003	0.959	0.031	0.021	0.028	0.014
cg15543281	0.004	0.007	0.008	0.005	0.007	0.008	0.009	0.076	0.004	0.938	0.012	0.022	0.006	0.012
cg12929567	0.004	0.003	0.003	0.003	0.004	0.003	0.005	0.047	0.002	0.63	0.006	0.025	0.012	0.006
cg19337852	0.001	0.002	0.003	0.003	0.006	0.003	0.008	0.061	0.005	0.971	0	0.047	0.003	0.002
cg15375239	0.002	0.003	0.004	0.007	0.014	0.004	0.009	0.072	0.002	0.96	0	0.065	0.001	0.005
cg08265644	0.002	0.005	0.004	0.004	0.005	0.005	0.011	0.064	0.023	0.695	0.022	0.017	0.012	0.003
cg14174099	0.007	0.007	0.009	0.008	0.018	0.009	0.013	0.071	0.025	0.711	0.008	0.05	0.004	0.012
cg23609571	0.005	0.004	0.006	0.003	0.008	0.004	0.003	0.061	0.007	0.789	0	0.032	0.012	0.009
cg23702412	0.024	0.034	0.038	0.024	0.046	0.022	0.03	0.112	0.05	0.607	0.051	0.049	0.027	0.025
cg13758646	0.003	0.003	0.003	0.002	0.005	0.002	0.007	0.048	0.014	0.771	0.02	0.044	0.003	0.002
cg10091994	0.002	0.002	0.005	0.003	0.002	0.003	0.028	0.054	0.003	0.777	0.008	0.04	0.003	0.002
cg15993083	0.032	0.032	0.036	0.032	0.035	0.031	0.085	0.096	0.025	0.508	0.058	0.088	0.044	0.052
cg25425078	0.031	0.025	0.026	0.022	0.027	0.026	0.037	0.062	0.036	0.364	0.025	0.061	0.041	0.044
cg13575161	0.041	0.044	0.041	0.036	0.044	0.035	0.142	0.117	0.041	0.675	0.095	0.09	0.056	0.058
cg03394150	0.002	0.005	0.006	0.005	0.007	0.004	0.007	0.063	0.006	0.873	0.002	0.057	0.005	0.005
cg09528825	0.004	0.015	0.01	0.008	0.022	0.007	0.012	0.088	0.002	0.784	0.016	0.051	0.013	0.012
cg17809849	0.002	0.002	0.005	0.002	0.003	0.004	0.004	0.058	0.002	0.661	0.006	0.04	0.003	0.003
cg06722792	0.073	0.068	0.066	0.066	0.071	0.068	0.087	0.111	0.079	0.516	0.098	0.148	0.102	0.093
cg03880509	0.01	0.008	0.017	0.01	0.013	0.009	0.015	0.068	0.016	0.713	0.018	0.013	0.046	0.061
cg21029447	0.018	0.019	0.023	0.023	0.019	0.024	0.044	0.121	0.009	0.886	0.003	0.008	0.073	0.168
cg15804767	0.004	0.002	0.004	0.003	0.005	0.002	0.011	0.046	0.012	0.755	0.011	0.003	0.006	0.042
cg07844931	0.005	0.012	0.005	0.004	0.005	0.006	0.013	0.072	0.007	0.749	0	0.01	0.007	0.004
cg03271965	0.005	0.007	0.005	0.004	0.005	0.005	0.011	0.06	0.017	0.556	0.009	0.022	0.005	0.005
cg24449148	0.007	0.004	0.007	0.006	0.005	0.006	0.002	0.037	0.002	0.542	0.01	0.007	0.011	0.005
cg09628838	0.004	0.034	0.005	0.007	0.009	0.005	0.009	0.038	0.002	0.901	0.003	0.054	0.007	0.004
cg13836638	0.003	0.006	0.004	0.003	0.003	0.003	0.005	0.039	0.004	0.717	0.007	0.056	0.008	0.005
cg01297191	0.008	0.006	0.011	0.008	0.01	0.007	0.01	0.098	0.006	0.914	0.005	0	0.005	0.011
cg02096916	0.007	0.006	0.009	0.008	0.011	0.008	0.005	0.073	0.004	0.932	0.005	0.01	0.006	0.012
cg14678099	0.007	0.012	0.013	0.006	0.007	0.01	0.018	0.028	0.004	0.744	0.01	0.021	0.01	0.005
cg23750142	0.003	0.01	0.006	0.006	0.008	0.005	0.012	0.055	0.009	0.815	0.003	0.034	0.014	0.003
cg01725199	0.004	0.002	0.002	0.003	0.001	0.003	0.007	0.101	0.002	0.765	0	0.018	0.006	0.009
cg05802452	0.003	0.012	0.004	0.004	0.009	0.004	0.013	0.07	0.01	0.719	0.007	0.002	0.004	0.006
cg01051310	0.004	0.061	0.008	0.006	0.024	0.004	0.012	0.065	0.007	0.607	0.004	0.096	0.003	0.002
cg14583869	0.005	0.004	0.004	0.004	0.005	0.005	0.006	0.041	0.009	0.631	0.001	0.042	0	0.003
cg07148880	0.003	0.004	0.003	0.002	0.002	0.005	0.011	0.066	0.001	0.507	0.003	0	0.002	0.002
cg07010314	0.013	0.013	0.016	0.011	0.013	0.012	0.022	0.089	0.025	0.595	0.012	0.02	0.022	0.015
cg26417642	0.006	0.01	0.006	0.006	0.008	0.008	0.017	0.058	0.004	0.811	0.004	0.019	0.016	0.008
cg06533200	0.011	0.014	0.016	0.016	0.009	0.014	0.023	0.014	0.004	0.515	0.013	0.008	0.029	0.022
cg05760393	0.014	0.012	0.016	0.014	0.014	0.015	0.026	0.133	0.006	0.598	0.011	0.013	0.029	0.022
cg18815943	0.018	0.109	0.042	0.026	0.069	0.016	0.026	0.101	0.005	0.95	0.003	0.094	0	0.011
cg15457058	0.005	0.046	0.009	0.007	0.023	0.006	0.003	0.055	0.003	0.949	0.001	0.034	0.004	0.005
cg08592530	0.006	0.007	0.006	0.004	0.006	0.005	0.007	0.004	0.003	0.334	0.002	0.004	0.014	0.004
cg12592974	0.005	0.003	0.008	0.004	0.004	0.005	0.007	0.082	0.002	0.336	0.009	0.008	0.003	0.008
cg22789900	0.003	0.003	0.004	0.003	0.004	0.004	0.011	0.066	0.039	0.712	0.002	0.005	0.004	0.003
cg17093995	0.005	0.026	0.013	0.007	0.027	0.003	0.006	0.041	0.009	0.945	0	0.055	0.008	0.002
cg14564616	0.003	0.03	0.012	0.006	0.014	0.004	0.004	0.065	0.011	0.928	0.011	0.028	0.006	0.006
cg21025551	0.004	0.006	0.005	0.006	0.004	0.005	0.008	0.082	0.011	0.664	0.013	0.005	0.01	0.013
cg05291427	0.004	0.004	0.004	0.002	0.003	0.004	0.012	0.068	0.007	0.616	0.005	0.011	0	0.011
cg23375190	0.028	0.028	0.029	0.025	0.03	0.03	0.049	0.144	0.024	0.614	0.017	0.025	0.048	0.043
cg13472656	0.028	0.035	0.04	0.039	0.03	0.043	0.067	0.229	0.056	0.678	0.053	0.022	0.093	0.057
cg15490075	0.004	0.008	0.003	0.004	0.004	0.005	0.019	0.093	0.007	0.935	0.018	0.011	0.009	0.02
cg21547190	0.004	0.006	0.007	0.005	0.004	0.007	0.012	0.062	0.017	0.365	0.012	0.002	0.004	0.005
cg15709087	0.006	0.004	0.004	0.005	0.006	0.006	0.006	0.016	0.001	0.407	0.003	0.021	0.008	0.004
cg18884940	0.006	0.007	0.005	0.005	0.006	0.007	0.006	0.038	0.008	0.523	0.004	0	0.012	0.009
cg05446724	0.007	0.005	0.013	0.008	0.017	0.01	0.011	0.097	0.003	0.943	0.003	0.008	0.017	0.008
cg04743961	0.013	0.033	0.015	0.017	0.016	0.012	0.028	0.164	0.026	0.845	0.022	0.044	0.032	0.021
cg21721093	0.005	0.013	0.006	0.002	0.003	0.004	0.007	0.068	0.006	0.682	0.002	0.019	0.007	0.007
cg23511432	0.005	0.004	0.003	0.002	0.004	0.002	0.009	0.058	0.004	0.614	0.008	0.028	0.007	0.003
cg02288341	0.041	0.048	0.046	0.045	0.045	0.045	0.054	0.08	0.054	0.363	0.043	0.096	0.054	0.059
cg25905674	0.003	0.002	0.005	0.003	0.004	0.003	0.003	0.059	0.005	0.494	0.015	0.001	0.001	0.007
cg06036912	0.028	0.1	0.093	0.05	0.092	0.024	0.079	0.229	0.2	0.875	0.109	0.115	0.032	0.033
cg02199397	0.005	0.015	0.015	0.01	0.02	0.006	0.017	0.018	0.011	0.847	0.007	0.058	0.005	0
cg22935149	0.002	0.011	0.006	0.004	0.008	0.005	0.012	0.011	0.008	0.592	0.007	0.04	0.01	0.007
cg07763047	0.004	0.012	0.009	0.006	0.012	0.005	0.004	0.055	0.026	0.884	0.027	0.031	0.001	0.007
cg01263292	0.003	0.004	0.004	0.002	0.002	0.002	0.004	0.046	0.005	0.513	0.01	0.02	0.007	0.006
cg18762736	0.013	0.012	0.009	0.008	0.014	0.009	0.009	0.047	0.003	0.714	0.005	0.005	0.014	0.012
cg05195235	0.004	0.003	0.006	0.007	0.002	0.004	0.01	0.102	0.004	0.736	0.004	0	0.014	0.006
cg17971531	0.006	0.004	0.01	0.007	0.011	0.007	0.013	0.086	0.01	0.838	0.005	0.016	0.011	0.005
cg16801887	0.005	0.065	0.009	0.004	0.022	0.004	0.012	0.059	0.005	0.947	0.003	0.017	0.004	0.006
cg03867475	0.029	0.049	0.032	0.032	0.032	0.031	0.029	0.12	0.056	0.716	0.018	0.078	0.033	0.042
cg26770917	0.002	0.006	0.004	0.003	0.005	0.005	0.003	0.079	0.01	0.642	0	0.02	0	0.009
cg08578245	0.003	0.003	0.006	0.006	0.017	0.004	0.01	0.076	0.008	0.914	0.002	0.062	0.008	0.004
cg01157070	0.009	0.011	0.014	0.005	0.016	0.008	0.03	0.116	0.015	0.443	0.007	0.029	0.014	0.008
cg07700514	0.003	0.009	0.008	0.004	0.032	0.003	0.018	0.067	0.002	0.867	0	0.049	0.005	0.001
cg02667667	0.008	0.006	0.011	0.009	0.02	0.002	0.008	0.092	0.009	0.677	0.019	0.014	0.01	0.01
cg19047292	0.017	0.029	0.025	0.019	0.048	0.022	0.053	0.106	0.008	0.838	0.012	0.061	0.018	0.028
cg07829842	0.007	0.015	0.011	0.013	0.023	0.011	0.022	0.109	0.008	0.687	0.011	0.017	0.004	0.008
cg00246932	0.015	0.011	0.013	0.014	0.024	0.017	0.037	0.095	0.02	0.628	0.024	0.035	0.021	0.023
cg03630847	0.004	0.007	0.006	0.006	0.004	0.007	0.005	0.011	0.002	0.507	0.004	0.049	0.007	0.006
cg20078466	0.005	0.009	0.005	0.004	0.006	0.003	0.018	0.093	0.022	0.925	0.019	0.012	0.009	0.007
cg11737742	0.034	0.044	0.034	0.039	0.035	0.037	0.055	0.199	0.022	0.917	0.085	0.071	0.064	0.053
cg24599205	0.008	0.008	0.006	0.01	0.01	0.007	0.019	0.072	0.003	0.927	0.015	0.045	0.002	0.009
cg02344820	0.005	0.019	0.007	0.007	0.013	0.005	0.011	0.066	0.017	0.899	0.01	0.028	0.015	0.01
cg14803306	0.012	0.009	0.011	0.011	0.014	0.009	0.037	0.081	0.15	0.693	0.066	0.008	0.011	0.132
cg13215869	0.006	0.009	0.009	0.007	0.004	0.005	0.009	0.007	0.031	0.572	0.011	0.008	0.008	0.02
cg25402610	0.005	0.007	0.009	0.005	0.01	0.004	0.009	0.09	0.004	0.789	0.009	0.026	0.002	0.007
cg05106897	0.006	0.015	0.016	0.01	0.028	0.008	0.029	0.079	0.007	0.595	0.008	0.044	0.022	0.014
cg05994148	0.002	0.005	0.003	0.003	0.007	0.002	0.002	0.089	0.002	0.564	0	0.016	0.002	0.002
cg20405174	0.005	0.006	0.009	0.009	0.015	0.006	0.016	0.072	0.005	0.407	0.005	0.035	0.011	0.008
cg05233674	0.049	0.059	0.048	0.05	0.055	0.05	0.054	0.102	0.033	0.62	0.065	0.062	0.061	0.038
cg00444847	0.048	0.048	0.05	0.048	0.053	0.043	0.065	0.103	0.043	0.446	0.064	0.077	0.045	0.055
cg13583934	0.004	0.016	0.005	0.005	0.005	0.005	0.006	0.055	0.025	0.935	0.021	0.047	0.021	0.041
cg02196294	0.007	0.023	0.007	0.009	0.006	0.006	0.011	0.056	0.042	0.948	0.046	0.061	0.013	0.059
cg17200161	0.003	0.027	0.006	0.002	0.003	0.003	0.009	0.048	0.001	0.947	0	0.077	0.009	0.037
cg23625715	0.004	0.005	0.007	0.002	0.006	0.003	0.034	0.073	0.009	0.714	0	0.006	0.015	0.008
cg01150641	0.056	0.067	0.056	0.06	0.058	0.052	0.157	0.134	0.075	0.715	0.121	0.069	0.052	0.055
cg00586365	0.007	0.006	0.006	0.007	0.006	0.008	0.009	0.006	0.004	0.867	0.001	0.018	0.006	0.005
cg25475603	0.009	0.009	0.011	0.011	0.009	0.011	0.02	0.054	0.005	0.85	0.005	0.027	0.022	0.013
cg04504441	0.011	0.018	0.014	0.011	0.021	0.012	0.024	0.148	0.008	0.933	0.007	0.058	0.02	0.013
cg23258881	0.007	0.009	0.007	0.006	0.006	0.008	0.013	0.062	0.006	0.03	0.352	0.009	0.006	0.009
cg20577019	0.027	0.028	0.034	0.029	0.029	0.032	0.038	0.068	0.031	0.062	0.273	0.05	0.035	0.036
cg10695848	0.006	0.005	0.009	0.005	0.006	0.007	0.008	0.093	0.02	0.054	0.487	0.002	0.027	0.007
cg02408775	0.003	0.006	0.005	0.003	0.004	0.006	0.004	0.054	0.091	0.043	0.512	0.045	0.01	0.007
cg07469555	0.011	0.019	0.021	0.01	0.015	0.014	0.017	0.085	0.029	0.031	0.56	0.047	0.017	0.011
cg07675334	0.07	0.071	0.071	0.067	0.057	0.072	0.073	0.189	0.047	0.11	0.406	0.09	0.09	0.104
cg04588455	0.011	0.014	0.013	0.008	0.013	0.014	0.019	0.111	0.017	0.052	0.554	0.033	0.057	0.049
cg20560075	0.006	0.016	0.005	0.004	0.005	0.005	0.014	0.07	0.005	0.086	0.35	0.043	0.006	0.007
cg20785674	0.024	0.024	0.024	0.023	0.027	0.024	0.074	0.074	0.048	0.08	0.711	0.024	0.075	0.035
cg23588713	0.016	0.021	0.019	0.015	0.02	0.024	0.04	0.079	0.024	0.091	0.691	0.043	0.081	0.075
cg11199810	0.016	0.019	0.02	0.011	0.02	0.021	0.036	0.1	0.023	0.055	0.472	0.015	0.022	0.035
cg25654652	0.006	0.011	0.009	0.008	0.008	0.007	0.01	0.092	0.097	0.042	0.472	0.074	0.02	0.013
cg17491987	0.02	0.018	0.026	0.016	0.018	0.018	0.021	0.092	0.026	0.05	0.434	0.037	0.01	0.015
cg05611779	0.005	0.003	0.005	0.005	0.003	0.004	0.006	0.071	0.015	0.039	0.216	0.011	0.012	0.003
cg17083506	0.009	0.009	0.008	0.014	0.007	0.01	0.015	0.063	0.009	0.042	0.292	0.005	0.024	0.037
cg19311889	0.008	0.006	0.006	0.02	0.011	0.011	0.013	0.092	0.045	0.054	0.36	0.035	0.007	0.011
cg15676015	0.008	0.009	0.007	0.007	0.008	0.008	0.041	0.132	0.018	0.041	0.374	0.027	0.011	0.026
cg23298160	0.004	0.003	0.007	0	0.003	0.006	0.009	0.064	0.018	0.045	0.175	0.002	0	0.004
cg18462521	0.013	0.013	0.024	0.024	0.024	0.013	0.035	0.055	0.104	0.053	0.508	0.012	0.054	0.059
cg14862207	0.018	0.02	0.019	0.017	0.021	0.016	0.049	0.244	0.316	0.542	0.93	0.029	0.012	0.16
cg03026373	0.003	0.005	0.004	0.008	0.006	0.005	0.023	0.128	0.255	0.282	0.897	0.017	0.02	0.105
cg08384314	0.011	0.017	0.011	0.014	0.015	0.014	0.018	0.271	0.167	0.04	0.823	0.038	0.005	0.175
cg17389738	0.088	0.084	0.079	0.077	0.078	0.079	0.096	0.206	0.286	0.096	0.51	0.148	0.102	0.334
cg14794936	0.017	0.04	0.084	0.04	0.068	0.017	0.04	0.171	0.078	0.24	0.813	0.054	0.033	0.03
cg03897866	0.02	0.023	0.023	0.023	0.026	0.021	0.064	0.194	0.031	0.086	0.556	0.034	0.045	0.037
cg00865724	0.003	0.007	0.003	0.005	0.006	0.004	0.031	0.137	0.009	0.048	0.299	0.022	0.004	0.063
cg06550177	0.01	0.028	0.029	0.111	0.04	0.015	0.334	0.132	0.009	0.114	0.776	0.024	0.02	0.024
cg19672993	0.022	0.028	0.037	0.023	0.039	0.022	0.04	0.102	0.148	0.138	0.603	0.043	0.024	0.028
cg03451296	0.004	0.006	0.004	0.004	0.007	0.004	0.007	0.046	0.01	0.037	0.149	0.029	0.007	0.009
cg23411981	0.015	0.032	0.011	0.024	0.02	0.024	0.052	0.162	0.065	0.12	0.521	0.032	0.013	0.034
cg03451296	0.004	0.006	0.004	0.004	0.007	0.004	0.007	0.046	0.01	0.037	0.149	0.029	0.007	0.009
cg23411981	0.015	0.032	0.011	0.024	0.02	0.024	0.052	0.162	0.065	0.12	0.521	0.032	0.013	0.034
cg07850967	0.028	0.025	0.028	0.025	0.026	0.029	0.032	0.13	0.034	0.063	0.431	0.053	0.029	0.027
cg25247183	0.015	0.018	0.016	0.017	0.018	0.016	0.022	0.075	0.204	0.044	0.564	0.023	0.035	0.191
cg10188897	0.019	0.023	0.023	0.021	0.022	0.03	0.031	0.073	0.094	0.242	0.603	0.07	0.054	0.045
cg25365990	0.043	0.055	0.086	0.059	0.069	0.043	0.082	0.085	0.078	0.109	0.724	0.045	0.085	0.069
cg08128768	0.008	0.008	0.035	0.007	0.02	0.006	0.399	0.082	0.038	0.036	0.568	0.038	0.017	0.027
cg24794433	0.06	0.059	0.095	0.064	0.078	0.053	0.491	0.124	0.06	0.101	0.492	0.134	0.082	0.092
cg03178838	0.065	0.081	0.074	0.076	0.071	0.089	0.094	0.146	0.519	0.118	0.699	0.091	0.226	0.231
cg23885932	0.014	0.012	0.015	0.012	0.014	0.012	0.007	0.065	0.412	0.045	0.695	0.015	0.098	0.171
cg09495643	0.076	0.081	0.079	0.072	0.072	0.072	0.085	0.126	0.511	0.113	0.685	0.082	0.213	0.243
cg25954914	0.025	0.029	0.027	0.024	0.023	0.027	0.04	0.081	0.141	0.261	0.601	0.04	0.029	0.027
cg02479773	0.003	0.004	0.006	0.005	0.004	0.002	0.051	0.206	0.064	0.304	0.554	0.003	0.007	0.067
cg01383799	0.044	0.037	0.039	0.036	0.037	0.035	0.032	0.079	0.04	0.084	0.454	0.047	0.041	0.047
cg16331823	0.017	0.017	0.018	0.017	0.014	0.021	0.037	0.247	0.061	0.072	0.141	0.016	0.03	0.047
cg16493531	0.01	0.013	0.012	0.016	0.012	0.013	0.016	0.253	0.058	0.051	0.487	0.038	0.037	0.123
cg10916998	0.029	0.026	0.034	0.028	0.025	0.034	0.042	0.231	0.057	0.08	0.324	0.023	0.036	0.088
cg13804182	0.031	0.035	0.032	0.035	0.027	0.026	0.048	0.115	0.085	0.073	0.276	0.059	0.043	0.158
cg03303359	0.081	0.089	0.087	0.081	0.083	0.081	0.086	0.11	0.072	0.117	0.434	0.084	0.094	0.096
cg01657744	0.055	0.065	0.063	0.061	0.064	0.049	0.054	0.072	0.051	0.085	0.665	0.074	0.11	0.098
cg18395466	0.028	0.088	0.058	0.045	0.073	0.031	0.04	0.141	0.016	0.076	0.548	0.08	0.045	0.031
cg16489193	0.04	0.065	0.112	0.053	0.073	0.047	0.087	0.122	0.163	0.072	0.718	0.064	0.037	0.051
cg12204258	0.02	0.066	0.023	0.019	0.031	0.029	0.162	0.479	0.097	0.132	0.843	0.04	0.012	0.057
cg16209664	0.135	0.259	0.163	0.117	0.203	0.109	0.35	0.388	0.271	0.181	0.639	0.294	0.093	0.287
cg13331354	0.003	0.006	0.006	0.003	0.005	0.005	0.172	0	0.005	0.03	0.187	0.007	0.011	0.009
cg04797170	0.048	0.044	0.038	0.04	0.046	0.051	0.058	0.082	0.051	0.122	0.335	0.08	0.115	0.062
cg08572315	0.041	0.039	0.037	0.043	0.039	0.043	0.039	0.086	0.059	0.109	0.504	0.064	0.074	0.046
cg17105609	0.008	0.01	0.014	0.009	0.009	0.009	0.051	0.025	0.334	0.038	0.525	0.079	0.027	0.151
cg05866411	0.026	0.04	0.038	0.035	0.027	0.036	0.062	0.131	0.461	0.09	0.554	0.154	0.071	0.127
cg20564913	0.015	0.017	0.03	0.015	0.018	0.017	0.055	0.121	0.475	0.045	0.559	0.149	0.052	0.171
cg08774969	0.008	0.008	0.015	0.009	0.01	0.006	0.056	0.063	0.341	0.038	0.486	0.045	0.034	0.132
cg06045337	0.013	0.017	0.015	0.013	0.012	0.02	0.039	0.07	0.456	0.04	0.725	0.015	0.096	0.26
cg16725050	0.136	0.142	0.152	0.136	0.139	0.143	0.181	0.357	0.078	0.565	0.35	0.166	0.19	0.217
cg11348442	0.004	0.005	0.007	0.005	0.005	0.007	0.042	0.122	0.035	0.333	0.418	0.002	0.017	0.031
cg04313875	0.006	0.011	0.007	0.237	0.018	0.006	0.01	0.077	0.485	0.032	0.861	0.023	0.047	0.311
cg03178838	0.065	0.081	0.074	0.076	0.071	0.089	0.094	0.146	0.519	0.118	0.699	0.091	0.226	0.231
cg02297063	0.007	0.01	0.009	0.009	0.008	0.009	0.014	0.053	0.522	0.028	0.817	0.004	0.336	0.211
cg16238993	0.044	0.049	0.051	0.043	0.048	0.046	0.053	0.095	0.485	0.058	0.766	0.052	0.252	0.241
cg19864130	0.031	0.037	0.037	0.036	0.036	0.034	0.035	0.068	0.475	0.07	0.787	0.019	0.386	0.27
cg03061122	0.004	0.005	0.004	0.005	0.004	0.004	0.003	0.047	0.264	0.517	0.624	0.024	0.008	0.043
cg25599475	0.013	0.015	0.017	0.017	0.014	0.018	0.03	0.074	0.18	0.04	0.411	0.047	0.09	0.074
cg04194674	0.006	0.008	0.007	0.009	0.008	0.008	0.103	0.276	0.416	0.322	0.893	0.006	0.011	0.196
cg17105609	0.008	0.01	0.014	0.009	0.009	0.009	0.051	0.025	0.334	0.038	0.525	0.079	0.027	0.151
cg05866411	0.026	0.04	0.038	0.035	0.027	0.036	0.062	0.131	0.461	0.09	0.554	0.154	0.071	0.127
cg20564913	0.015	0.017	0.03	0.015	0.018	0.017	0.055	0.121	0.475	0.045	0.559	0.149	0.052	0.171
cg08774969	0.008	0.008	0.015	0.009	0.01	0.006	0.056	0.063	0.341	0.038	0.486	0.045	0.034	0.132
cg26146308	0.009	0.008	0.016	0.026	0.02	0.008	0.005	0.008	0.095	0.039	0.164	0	0.02	0.004
cg14862207	0.018	0.02	0.019	0.017	0.021	0.016	0.049	0.244	0.316	0.542	0.93	0.029	0.012	0.16
cg03026373	0.003	0.005	0.004	0.008	0.006	0.005	0.023	0.128	0.255	0.282	0.897	0.017	0.02	0.105
cg25590492	0.043	0.079	0.06	0.04	0.079	0.038	0.114	0.323	0.123	0.044	0.71	0.102	0.019	0.055
cg01237565	0.01	0.014	0.024	0.011	0.019	0.017	0.016	0.129	0.008	0.053	0.27	0.007	0.017	0.102
cg10466124	0.018	0.019	0.03	0.02	0.017	0.021	0.047	0.07	0.145	0.074	0.327	0.013	0.029	0.016
cg11671913	0.035	0.035	0.034	0.031	0.035	0.035	0.051	0.092	0.192	0.138	0.527	0.067	0.039	0.054
cg06822952	0.01	0.011	0.01	0.009	0.008	0.01	0.015	0.056	0.098	0.031	0.197	0.021	0.017	0.018
cg17102069	0.008	0.067	0.008	0.01	0.011	0.012	0.027	0.042	0.011	0.037	0.191	0.046	0.011	0.016
cg01184784	0.02	0.019	0.04	0.021	0.018	0.024	0.089	0.092	0.108	0.573	0.67	0.016	0.044	0.015
cg00067414	0.037	0.04	0.042	0.044	0.043	0.033	0.059	0.065	0.059	0.079	0.408	0.068	0.042	0.047
cg04879506	0.01	0.01	0.01	0.009	0.008	0.01	0.016	0.057	0.035	0.034	0.141	0.015	0.009	0.009
cg14399863	0.034	0.048	0.071	0.045	0.076	0.031	0.045	0.074	0.06	0.072	0.516	0.09	0.091	0.106
cg11597497	0.041	0.04	0.049	0.047	0.037	0.038	0.07	0.16	0.329	0.123	0.75	0.046	0.044	0.223
cg23804620	0.011	0.118	0.019	0.011	0.016	0.018	0.293	0.087	0.135	0.041	0.84	0.063	0.461	0.134
cg14567593	0.043	0.051	0.044	0.045	0.04	0.051	0.044	0.161	0.244	0.084	0.568	0.057	0.037	0.062
cg11828180	0.03	0.063	0.049	0.036	0.057	0.026	0.046	0.184	0.328	0.479	0.885	0.052	0.027	0.128
cg12565250	0.013	0.036	0.025	0.021	0.011	0.009	0.021	0.178	0.036	0.092	0.337	0.035	0.068	0.029
cg10512745	0.012	0.046	0.026	0.014	0.033	0.009	0.014	0.092	0.08	0.636	0.794	0.134	0.009	0.254
cg03245733	0.042	0.047	0.052	0.051	0.043	0.043	0.045	0.066	0.039	0.102	0.41	0.055	0.071	0.053
cg00087417	0.026	0.032	0.027	0.03	0.025	0.025	0.076	0.095	0.039	0.081	0.386	0.06	0.056	0.096
cg19033654	0.029	0.116	0.129	0.263	0.198	0.019	0.017	0.432	0.095	0.052	0.798	0.091	0.024	0.325
cg08794940	0.043	0.051	0.057	0.063	0.062	0.045	0.048	0.126	0.07	0.081	0.398	0.097	0.062	0.177
cg14433074	0.024	0.076	0.081	0.123	0.106	0.029	0.044	0.205	0.094	0.077	0.736	0.067	0.039	0.315
cg10698928	0.011	0.128	0.053	0.013	0.09	0.008	0.01	0.086	0.006	0.584	0.647	0.1	0.007	0.038
cg09588360	0.053	0.058	0.056	0.049	0.054	0.047	0.099	0.101	0.208	0.073	0.583	0.084	0.063	0.081
cg06848185	0.011	0.02	0.019	0.02	0.025	0.015	0.022	0.122	0.079	0.193	0.407	0.076	0.033	0.089
cg09318066	0.035	0.041	0.035	0.046	0.037	0.044	0.044	0.101	0.331	0.091	0.538	0.022	0.064	0.069
cg09701880	0.031	0.037	0.028	0.026	0.03	0.026	0.022	0.104	0.049	0.092	0.705	0.066	0.524	0.223
cg03355998	0.02	0.035	0.022	0.018	0.024	0.018	0.109	0.152	0.57	0.278	0.851	0.034	0.037	0.204
cg03048654	0.056	0.116	0.091	0.058	0.111	0.058	0.062	0.229	0.161	0.786	0.673	0.138	0.009	0.132
cg06611922	0.016	0.047	0.04	0.021	0.051	0.016	0.05	0.125	0.153	0.525	0.661	0.042	0.009	0.087
cg11836236	0.053	0.063	0.064	0.055	0.074	0.056	0.074	0.145	0.142	0.126	0.383	0.077	0.055	0.119
cg14968732	0.041	0.052	0.061	0.039	0.076	0.032	0.088	0.099	0.226	0.174	0.721	0.053	0.14	0.223
cg14550985	0.305	0.345	0.464	0.134	0.363	0.298	0.263	0.122	0.235	0.097	0.393	0.394	0.259	0.224
cg08995609	0.03	0.043	0.075	0.037	0.046	0.028	0.102	0.086	0.083	0.089	0.488	0.045	0.094	0.128
cg08738430	0.01	0.011	0.01	0.011	0.007	0.01	0.001	0.1	0.112	0.039	0.223	0.012	0.012	0.072
cg24823751	0.013	0.034	0.049	0.035	0.053	0.012	0.053	0.293	0.047	0.112	0.419	0.028	0.008	0.024
cg00282704	0.026	0.054	0.074	0.063	0.115	0.04	0.194	0.262	0.096	0.179	0.567	0.081	0.032	0.07
cg11779273	0.006	0.048	0.018	0.007	0.058	0.003	0.012	0.081	0.013	0.049	0.185	0.033	0	0.01
cg13084458	0.044	0.162	0.145	0.061	0.202	0.039	0.045	0.084	0.033	0.088	0.202	0.141	0.039	0.043
cg25442239	0.018	0.063	0.042	0.025	0.06	0.019	0.027	0.045	0.015	0.06	0.139	0.054	0.019	0.018
cg06679087	0.009	0.056	0.108	0.039	0.177	0.015	0.057	0.144	0.275	0.114	0.706	0.106	0.034	0.157
cg06616710	0.038	0.149	0.183	0.069	0.275	0.037	0.072	0.069	0.139	0.152	0.442	0.155	0.039	0.149
cg03425412	0.057	0.069	0.054	0.052	0.064	0.055	0.056	0.077	0.051	0.195	0.675	0.093	0.05	0.362
cg23258881	0.007	0.009	0.007	0.006	0.006	0.008	0.013	0.062	0.006	0.03	0.352	0.009	0.006	0.009
cg20577019	0.027	0.028	0.034	0.029	0.029	0.032	0.038	0.068	0.031	0.062	0.273	0.05	0.035	0.036
cg21546996	0.005	0.011	0.013	0.007	0.009	0.012	0.011	0.013	0.017	0.085	0.121	0.012	0.019	0.011
cg04394254	0.036	0.044	0.047	0.04	0.052	0.038	0.049	0.165	0.294	0.064	0.547	0.083	0.04	0.052
cg19618955	0.036	0.041	0.037	0.04	0.046	0.025	0.108	0.286	0.228	0.116	0.603	0.038	0.038	0.072
cg18097224	0.011	0.011	0.006	0.007	0.005	0.008	0.043	0.16	0.068	0.127	0.26	0.027	0.016	0.02
cg11485451	0.013	0.018	0.015	0.01	0.012	0.011	0.053	0.183	0.102	0.102	0.319	0.035	0.01	0.028
cg17487170	0.264	0.276	0.239	0.233	0.233	0.259	0.314	0.436	0.325	0.309	0.628	0.34	0.267	0.314
cg13046271	0.075	0.078	0.065	0.061	0.066	0.067	0.129	0.161	0.15	0.147	0.26	0.101	0.09	0.101
cg09918657	0.023	0.037	0.122	0.035	0.132	0.033	0.093	0.085	0.104	0.374	0.634	0.063	0.011	0.071
cg06251289	0.019	0.02	0.012	0.014	0.011	0.021	0.062	0.148	0.154	0.337	0.496	0.062	0.017	0.053
cg17346857	0.06	0.068	0.063	0.059	0.055	0.063	0.091	0.094	0.166	0.277	0.319	0.224	0.095	0.112
cg14262681	0.009	0.057	0.025	0.009	0.044	0.006	0.009	0.064	0.046	0.958	0.782	0.081	0.002	0.159
cg08183724	0.045	0.089	0.081	0.045	0.098	0.036	0.058	0.198	0.035	0.53	0.797	0.064	0.05	0.172
cg04055819	0.04	0.054	0.067	0.034	0.063	0.037	0.064	0.107	0.055	0.495	0.637	0.08	0.052	0.057
cg20517614	0.03	0.044	0.043	0.029	0.051	0.029	0.045	0.074	0.074	0.434	0.451	0.078	0.033	0.053
cg00571421	0.018	0.014	0.02	0.018	0.023	0.018	0.034	0.106	0.07	0.077	0.251	0.038	0.018	0.019
cg00120948	0.079	0.078	0.07	0.171	0.072	0.127	0.052	0.107	0.055	0.069	0.582	0.099	0.057	0.066
cg19250790	0.013	0.016	0.021	0.018	0.014	0.019	0.035	0.089	0.418	0.05	0.477	0.012	0.082	0.12
cg22749173	0.098	0.078	0.097	0.089	0.08	0.104	0.131	0.135	0.217	0.32	0.209	0.114	0.193	0.154
cg09134794	0.073	0.086	0.08	0.069	0.087	0.065	0.062	0.156	0.048	0.205	0.596	0.073	0.063	0.077
cg15063753	0.003	0.003	0.003	0.005	0.001	0.004	0.007	0.045	0.01	0.023	0.004	0.204	0.004	0.004
cg23687994	0.003	0.004	0.005	0.005	0.004	0.007	0.011	0.047	0.011	0.033	0.008	0.222	0.008	0.006
cg12549201	0.002	0.006	0.005	0.003	0.003	0.003	0.009	0.079	0.005	0.032	0.001	0.172	0.004	0.004
cg15057238	0.003	0.003	0.004	0.003	0.005	0.004	0.007	0.066	0.003	0.031	0.002	0.197	0	0.005
cg01443832	0.003	0.004	0.005	0.002	0.002	0.003	0.006	0.055	0.006	0.033	0.002	0.17	0.012	0.001
cg00313795	0.035	0.038	0.043	0.037	0.025	0.033	0.047	0.125	0.026	0.113	0.027	0.209	0.122	0.106
cg20099054	0.005	0.007	0.008	0.006	0.006	0.007	0.008	0.051	0.006	0.025	0.006	0.206	0.005	0.003
cg27628854	0.003	0.005	0.003	0.002	0.008	0.002	0.009	0.039	0.004	0.03	0.009	0.164	0.012	0.011
cg15153412	0.006	0.005	0.006	0.005	0.004	0.007	0.009	0.043	0.005	0.039	0	0.176	0.002	0.005
cg12549201	0.002	0.006	0.005	0.003	0.003	0.003	0.009	0.079	0.005	0.032	0.001	0.172	0.004	0.004
cg15057238	0.003	0.003	0.004	0.003	0.005	0.004	0.007	0.066	0.003	0.031	0.002	0.197	0	0.005
cg01443832	0.003	0.004	0.005	0.002	0.002	0.003	0.006	0.055	0.006	0.033	0.002	0.17	0.012	0.001
cg00590991	0.007	0.007	0.008	0.011	0.01	0.008	0.013	0.057	0.003	0.033	0.009	0.194	0.009	0.007
cg00616500	0.009	0.008	0.011	0.01	0.008	0.009	0.012	0.053	0.008	0.039	0.007	0.239	0.008	0.012
cg14507193	0.004	0.013	0.004	0.005	0.009	0.006	0.007	0.048	0.004	0.046	0	0.19	0.009	0.003
cg27628854	0.003	0.005	0.003	0.002	0.008	0.002	0.009	0.039	0.004	0.03	0.009	0.164	0.012	0.011
cg15153412	0.006	0.005	0.006	0.005	0.004	0.007	0.009	0.043	0.005	0.039	0	0.176	0.002	0.005
cg11171224	0.006	0.007	0.009	0.007	0.01	0.008	0.026	0.05	0.005	0.033	0	0.201	0.005	0.004
cg23992449	0.005	0.004	0.004	0.004	0.005	0.003	0.007	0.034	0.008	0.022	0.012	0.134	0.006	0.002
cg12549201	0.002	0.006	0.005	0.003	0.003	0.003	0.009	0.079	0.005	0.032	0.001	0.172	0.004	0.004
cg15057238	0.003	0.003	0.004	0.003	0.005	0.004	0.007	0.066	0.003	0.031	0.002	0.197	0	0.005
cg01443832	0.003	0.004	0.005	0.002	0.002	0.003	0.006	0.055	0.006	0.033	0.002	0.17	0.012	0.001
cg16149129	0.006	0.003	0.004	0.003	0.002	0.003	0.008	0.075	0.002	0.038	0.002	0.174	0.006	0.006
cg12358000	0.007	0.026	0.005	0.008	0.005	0.004	0.01	0.06	0.004	0.035	0.001	0.2	0.008	0.01
cg23416667	0.005	0.03	0.008	0.008	0.015	0.006	0.008	0.031	0.003	0.043	0.004	0.201	0.018	0.009
cg00590991	0.007	0.007	0.008	0.011	0.01	0.008	0.013	0.057	0.003	0.033	0.009	0.194	0.009	0.007
cg00616500	0.009	0.008	0.011	0.01	0.008	0.009	0.012	0.053	0.008	0.039	0.007	0.239	0.008	0.012
cg17167076	0.011	0.014	0.007	0.007	0.009	0.012	0.021	0.117	0.005	0.037	0.011	0.117	0.031	0.022
cg27659841	0.005	0.009	0.008	0.007	0.004	0.005	0.01	0.006	0.006	0.03	0.014	0.13	0.013	0.009
cg14792031	0.013	0.019	0.02	0.021	0.018	0.016	0.047	0.174	0.012	0.118	0.012	0.019	0.012	0.017
cg22109320	0.027	0.026	0.026	0.027	0.024	0.025	0.026	0.053	0.022	0.06	0.018	0.405	0.033	0.03
cg17105358	0.004	0.005	0.004	0.004	0.004	0.004	0.007	0.081	0.036	0.036	0.034	0.233	0.006	0.009
cg21690091	0.042	0.043	0.045	0.042	0.046	0.041	0.056	0.065	0.047	0.072	0.054	0.654	0.064	0.049
cg17493098	0.006	0.007	0.008	0.007	0.003	0.006	0.008	0.052	0.028	0.037	0.014	0.193	0.01	0.009
cg00660163	0.01	0.015	0.009	0.006	0.014	0.008	0.005	0.04	0.007	0.042	0.008	0.182	0.003	0.017
cg26297866	0.004	0.011	0.01	0.01	0.008	0.009	0.028	0.188	0.051	0.073	0	0.031	0.002	0.019
cg17595410	0.002	0.003	0.005	0.002	0.003	0.004	0.004	0.042	0.008	0.044	0.009	0.128	0.01	0.002
cg03970039	0.003	0.007	0.008	0.004	0.01	0.004	0.007	0.042	0.01	0.038	0.005	0.137	0.003	0.006
cg20675019	0.009	0.01	0.011	0.011	0.01	0.011	0.012	0.066	0.005	0.027	0.002	0.185	0.013	0.013
cg19091756	0.026	0.032	0.032	0.025	0.03	0.026	0.033	0.119	0.016	0.057	0.034	0.131	0.042	0.051
cg26320410	0.007	0.009	0.007	0.007	0.008	0.008	0.014	0.056	0.004	0.044	0	0.171	0.012	0.014
cg21415305	0.075	0.075	0.081	0.072	0.072	0.086	0.087	0.35	0.031	0.109	0.096	0.292	0.091	0.12
cg18083704	0.01	0.012	0.017	0.008	0.015	0.011	0.011	0.151	0.007	0.094	0.008	0.187	0.013	0.019
cg01423563	0.044	0.038	0.046	0.041	0.038	0.042	0.061	0.104	0.064	0.082	0.081	0.174	0.058	0.066
cg15760257	0.009	0.007	0.008	0.009	0.01	0.007	0.017	0.019	0.005	0.041	0.005	0.146	0.015	0.012
cg17055145	0.003	0.006	0.005	0.004	0.003	0.003	0.01	0.058	0.013	0.035	0.006	0.145	0.011	0.007
cg03797501	0.028	0.036	0.025	0.022	0.03	0.02	0.022	0.088	0.059	0.053	0.069	0.133	0.028	0.018
cg01919118	0.033	0.044	0.039	0.033	0.039	0.035	0.043	0.147	0.022	0.069	0.027	0.171	0.062	0.044
cg19889264	0.069	0.08	0.076	0.069	0.065	0.078	0.082	0.208	0.016	0.09	0.035	0.169	0.101	0.1
cg27051335	0.011	0.015	0.011	0.01	0.014	0.009	0.011	0.075	0.001	0.039	0	0.195	0.018	0.01
cg22947959	0.006	0.008	0.009	0.006	0.006	0.006	0.01	0.059	0.005	0.035	0.015	0.154	0.006	0.007
cg14913969	0.007	0.081	0.015	0.006	0.01	0.005	0.007	0.064	0.009	0.034	0.006	0.214	0.001	0.002
cg22411407	0.005	0.003	0.005	0.003	0.003	0.004	0.005	0.043	0.004	0.068	0.004	0.14	0.008	0.009
cg10549156	0.004	0.003	0.006	0.005	0.005	0.005	0.007	0.043	0.002	0.22	0.01	0.14	0.005	0.01
cg09866690	0.013	0.015	0.015	0.019	0.018	0.018	0.03	0.076	0.005	0.219	0.013	0.126	0.038	0.035
cg24591182	0.003	0.008	0.006	0.007	0.009	0.005	0.007	0.059	0.019	0.027	0.012	0.152	0.011	0.011
cg10545536	0.006	0.006	0.006	0.007	0.004	0.007	0.01	0.081	0.005	0.037	0.006	0.157	0.011	0.005
cg05460370	0.005	0.004	0.008	0.006	0.005	0.004	0.009	0.099	0.012	0.043	0.009	0.139	0.007	0.007
cg20669266	0.004	0.007	0.008	0.006	0.008	0.005	0.011	0.077	0.006	0.045	0.004	0.15	0.002	0.004
cg16468187	0.007	0.054	0.013	0.008	0.009	0.006	0.011	0.07	0.003	0.037	0.009	0.193	0.004	0.013
cg22696438	0.006	0.034	0.008	0.004	0.006	0.006	0.007	0.049	0.002	0.026	0.002	0.125	0.007	0.004
cg05351267	0.006	0.005	0.006	0.007	0.006	0.007	0.011	0.055	0.002	0.035	0.002	0.118	0.007	0.007
cg09370756	0.431	0.435	0.421	0.438	0.421	0.427	0.383	0.521	0.143	0.407	0.274	0.426	0.421	0.401
cg19861329	0.003	0.003	0.004	0.004	0.004	0.003	0.007	0.061	0.01	0.037	0.01	0.116	0.002	0.004
cg06412434	0.019	0.022	0.022	0.012	0.018	0.02	0.016	0.096	0.012	0.041	0.03	0.143	0.022	0.023
cg05756848	0.008	0.007	0.005	0.003	0.009	0.009	0.023	0.085	0.011	0.051	0.018	0.119	0.001	0.01
cg27414233	0.009	0.011	0.009	0.005	0.007	0.008	0.004	0.063	0.009	0.036	0.013	0.148	0.014	0.008
cg04009887	0.03	0.07	0.019	0.044	0.022	0.033	0.013	0.065	0.005	0.113	0.103	0.402	0.011	0.012
cg04611479	0.008	0.017	0.008	0.009	0.006	0.007	0.008	0.065	0.009	0.035	0.006	0.14	0.001	0.012
cg15954782	0.005	0.01	0.007	0.008	0.004	0.01	0.013	0.061	0.004	0.036	0.002	0.141	0.022	0.011
cg10165847	0.012	0.152	0.02	0.014	0.04	0.008	0.023	0.01	0.004	0.042	0.005	0.247	0.007	0.005
cg15465571	0.003	0.006	0.007	0.009	0.006	0.008	0.015	0.009	0.056	0.048	0.03	0.157	0.015	0.005
cg25353308	0.006	0.047	0.013	0.012	0.025	0.006	0.009	0.073	0.006	0.033	0.004	0.176	0	0.009
cg08608532	0.005	0.006	0.004	0.005	0.005	0.004	0.005	0.061	0.004	0.039	0.002	0.113	0.009	0.01
cg21921384	0.012	0.05	0.018	0.013	0.022	0.011	0.023	0.065	0.015	0.049	0.014	0.171	0.03	0.038
cg01959562	0.006	0.048	0.011	0.006	0.013	0.004	0.004	0.071	0.003	0.04	0.009	0.177	0.01	0.025
cg09795194	0.011	0.021	0.014	0.01	0.009	0.012	0.016	0.107	0.009	0.041	0.005	0.201	0.015	0.015
cg16462237	0.025	0.042	0.033	0.03	0.025	0.025	0.034	0.015	0.009	0.052	0.001	0.207	0.044	0.027
cg07441156	0.012	0.021	0.019	0.016	0.014	0.016	0.025	0.083	0.009	0.042	0.015	0.229	0.031	0.021
cg24627793	0.007	0.008	0.009	0.006	0.006	0.009	0.007	0.059	0.005	0.034	0.009	0.122	0.006	0.007
cg16560774	0.016	0.069	0.014	0.012	0.013	0.013	0.019	0.043	0.003	0.044	0.007	0.195	0.012	0.016
cg22638268	0.039	0.045	0.046	0.037	0.042	0.043	0.057	0.079	0.045	0.07	0.065	0.484	0.066	0.067
cg20536983	0.059	0.26	0.063	0.065	0.106	0.066	0.068	0.158	0.039	0.069	0.05	0.317	0.064	0.048
cg03304380	0.025	0.2	0.016	0.017	0.043	0.007	0.028	0.062	0.013	0.038	0.011	0.327	0.004	0.01
cg21794428	0.004	0.057	0.004	0.006	0.007	0.003	0.004	0.024	0.007	0.039	0.003	0.117	0.006	0.004
cg10129201	0.008	0.089	0.013	0.01	0.019	0.004	0.015	0.051	0.004	0.032	0.001	0.186	0.012	0.013
cg21205463	0.016	0.024	0.018	0.016	0.014	0.015	0.014	0.062	0.007	0.053	0.011	0.193	0.012	0.021
cg27269921	0.006	0.069	0.007	0.007	0.006	0.004	0.013	0.051	0.008	0.053	0.006	0.172	0.013	0.01
cg20018561	0.045	0.048	0.053	0.042	0.044	0.048	0.043	0.185	0.02	0.053	0.014	0.216	0.049	0.058
cg18796523	0.007	0.011	0.013	0.006	0.006	0.008	0.009	0.124	0.006	0.026	0.009	0.167	0.013	0.008
cg20045888	0.011	0.023	0.018	0.009	0.019	0.014	0.009	0.081	0.007	0.035	0.026	0.184	0.011	0.013
cg11725975	0.012	0.016	0.016	0.01	0.007	0.009	0.006	0.169	0.006	0.056	0.008	0.224	0.016	0.007
cg25667490	0.021	0.036	0.034	0.025	0.034	0.029	0.033	0.145	0.013	0.153	0.011	0.059	0.058	0.06
cg06621094	0.008	0.114	0.011	0.006	0.021	0.005	0.005	0.065	0.002	0.051	0.002	0.194	0.006	0.003
cg10861495	0.032	0.036	0.035	0.032	0.028	0.04	0.046	0.125	0.015	0.126	0.024	0.195	0.06	0.052
cg26261192	0.006	0.008	0.009	0.006	0.006	0.011	0.012	0.101	0.008	0.077	0	0.088	0.019	0.007
cg11404486	0.01	0.012	0.012	0.012	0.011	0.011	0.014	0.084	0.006	0.117	0.008	0.212	0.015	0.017
cg09686317	0.006	0.054	0.015	0.01	0.066	0.003	0.006	0.068	0.006	0.033	0.003	0.178	0.005	0.002
cg26068551	0.012	0.066	0.015	0.019	0.084	0.006	0.007	0.132	0.01	0.047	0.007	0.152	0.01	0.005
cg10282524	0.004	0.004	0.002	0.004	0.004	0.001	0.009	0.068	0.011	0.049	0.006	0.111	0.008	0.003
cg11342332	0.011	0.029	0.031	0.016	0.06	0.011	0.018	0.084	0.011	0.058	0.017	0.238	0.017	0.01
cg06615861	0.015	0.022	0.026	0.013	0.03	0.017	0.016	0.079	0.005	0.042	0.008	0.189	0.019	0.019
cg21952901	0.011	0.019	0.019	0.015	0.024	0.012	0.018	0.075	0.003	0.035	0.002	0.167	0.015	0.014
cg10545536	0.006	0.006	0.006	0.007	0.004	0.007	0.01	0.081	0.005	0.037	0.006	0.157	0.011	0.005
cg05460370	0.005	0.004	0.008	0.006	0.005	0.004	0.009	0.099	0.012	0.043	0.009	0.139	0.007	0.007
cg21003581	0.013	0.115	0.019	0.022	0.07	0.01	0.014	0.083	0.014	0.059	0.012	0.195	0.02	0.02
cg17137182	0.008	0.062	0.012	0.009	0.032	0.007	0.008	0.057	0.004	0.037	0.007	0.154	0	0.003
cg04290779	0.004	0.007	0.007	0.005	0.006	0.004	0.007	0.076	0.012	0.03	0.003	0.118	0.011	0.016
cg10497884	0.016	0.056	0.019	0.015	0.02	0.013	0.021	0.008	0.036	0.053	0.029	0.201	0.018	0.02
cg18954700	0.015	0.11	0.02	0.016	0.022	0.009	0.016	0.069	0.017	0.05	0.013	0.242	0.022	0.014
cg25894334	0.01	0.064	0.01	0.006	0.014	0.008	0.007	0.084	0.009	0.045	0.001	0.11	0.017	0.008
cg08073591	0.009	0.076	0.012	0.004	0.013	0.005	0.013	0.048	0.005	0.042	0.009	0.153	0.005	0.007
cg06912515	0.011	0.007	0.01	0.009	0.011	0.007	0.011	0.073	0.003	0.034	0.005	0.118	0	0.01
cg11342332	0.011	0.029	0.031	0.016	0.06	0.011	0.018	0.084	0.011	0.058	0.017	0.238	0.017	0.01
cg06615861	0.015	0.022	0.026	0.013	0.03	0.017	0.016	0.079	0.005	0.042	0.008	0.189	0.019	0.019
cg00229245	0.007	0.015	0.012	0.012	0.012	0.012	0.018	0.071	0.008	0.038	0.014	0.155	0.02	0.016
cg14743593	0.004	0.003	0.003	0.002	0.002	0.002	0.004	0.06	0.002	0.303	0.008	0.247	0.01	0.004
cg16238795	0.003	0.004	0.004	0.003	0.005	0.004	0.005	0.048	0.008	0.259	0.007	0.138	0.01	0.004
cg13357482	0.004	0.053	0.015	0.005	0.015	0.005	0.015	0.04	0.003	0.025	0	0.121	0.01	0.008
cg04810065	0.038	0.109	0.06	0.029	0.065	0.031	0.027	0.114	0.012	0.039	0.018	0.159	0.026	0.014
cg24989739	0.029	0.102	0.052	0.017	0.051	0.025	0.028	0.115	0.003	0.042	0.009	0.153	0.042	0.029
cg06577045	0.013	0.066	0.024	0.009	0.023	0.012	0.014	0.076	0.003	0.031	0.005	0.119	0.007	0.007
cg08451598	0.01	0.008	0.015	0.007	0.007	0.009	0.015	0.069	0.004	0.04	0.006	0.132	0.02	0.006
cg01351037	0.007	0.007	0.009	0.008	0.005	0.008	0.013	0.099	0.01	0.037	0.024	0.151	0.009	0.011
cg02839273	0.085	0.078	0.081	0.072	0.069	0.073	0.092	0.147	0.099	0.107	0.118	0.198	0.079	0.102
cg22664296	0.008	0.12	0.011	0.007	0.04	0.005	0.019	0.045	0.008	0.031	0.008	0.201	0.003	0.029
cg08369258	0.005	0.008	0.01	0.005	0.008	0.008	0.006	0.076	0.016	0.049	0	0.126	0.011	0.006
cg09156233	0.011	0.111	0.022	0.013	0.045	0.008	0.02	0.043	0.003	0.036	0.003	0.196	0.006	0.008
cg19031658	0.006	0.061	0.013	0.008	0.032	0.005	0.007	0.063	0.009	0.037	0.013	0.165	0.012	0.011
cg11923627	0.005	0.006	0.007	0.008	0.01	0.008	0.018	0.061	0.014	0.033	0.016	0.126	0.017	0.01
cg27589088	0.015	0.074	0.016	0.009	0.015	0.008	0.01	0.057	0.003	0.037	0.003	0.158	0.009	0.012
cg16921014	0.065	0.076	0.067	0.062	0.083	0.06	0.057	0.15	0.01	0.076	0.025	0.234	0.061	0.083
cg25185518	0.029	0.037	0.025	0.026	0.051	0.019	0.015	0.066	0.005	0.037	0.013	0.22	0.017	0.032
cg07779120	0.012	0.144	0.021	0.008	0.02	0.011	0.012	0.083	0.005	0.035	0.015	0.226	0.005	0.011
cg16017578	0.011	0.033	0.016	0.012	0.02	0.012	0.02	0.086	0.013	0.056	0.009	0.195	0.017	0.024
cg19186435	0.007	0.009	0.015	0.007	0.008	0.011	0.018	0.091	0.004	0.031	0	0.132	0.008	0.015
cg20637307	0.007	0.051	0.019	0.005	0.026	0.002	0.005	0.05	0.012	0.086	0.002	0.161	0.001	0.008
cg16329650	0.024	0.032	0.031	0.016	0.029	0.024	0.049	0.168	0.069	0.224	0.036	0	0.024	0.14
cg21805221	0.009	0.023	0.02	0.011	0.033	0.01	0.013	0.087	0.005	0.05	0.011	0.137	0.013	0.014
cg06943981	0.005	0.01	0.008	0.011	0.016	0.008	0.019	0.064	0.005	0.041	0	0.128	0.015	0.014
cg02334314	0.008	0.081	0.013	0.012	0.017	0.008	0.012	0.072	0.017	0.066	0.013	0.202	0.013	0.014
cg19433769	0.004	0.003	0.003	0.003	0.003	0.004	0	0.079	0.002	0.055	0.003	0.102	0.008	0.006
cg01956420	0.022	0.19	0.026	0.011	0.075	0.004	0.009	0.069	0.004	0.042	0.005	0.281	0.013	0.008
cg20327444	0.015	0.077	0.021	0.025	0.033	0.007	0.008	0.111	0.008	0.041	0.008	0.077	0.005	0.008
cg17541528	0.011	0.118	0.025	0.015	0.041	0.007	0.015	0.03	0.014	0.042	0.003	0.154	0.012	0.007
cg11586658	0.039	0.042	0.051	0.037	0.04	0.048	0.088	0.15	0.025	0.071	0.021	0.073	0.057	0.044
cg09800012	0.01	0.008	0.005	0.007	0.005	0.007	0.006	0.078	0.006	0.041	0	0.119	0.026	0.005
cg11112892	0.009	0.007	0.005	0.009	0.005	0.007	0.023	0.122	0.005	0.056	0	0.078	0.005	0.006
cg24971349	0.005	0.005	0.006	0.008	0.004	0.005	0.002	0.077	0.003	0.082	0.001	0.118	0	0.006
cg14275457	0.006	0.009	0.009	0.012	0.01	0.01	0.01	0.11	0.004	0.044	0	0.142	0.013	0.011
cg20872579	0.036	0.046	0.043	0.029	0.042	0.031	0.021	0.071	0.016	0.05	0.012	0.262	0.035	0.024
cg09795194	0.011	0.021	0.014	0.01	0.009	0.012	0.016	0.107	0.009	0.041	0.005	0.201	0.015	0.015
cg16462237	0.025	0.042	0.033	0.03	0.025	0.025	0.034	0.015	0.009	0.052	0.001	0.207	0.044	0.027
cg21735491	0.005	0.003	0.006	0.004	0.01	0.003	0.011	0.075	0.031	0.05	0	0.024	0.723	0.036
cg22940848	0.007	0.009	0.011	0.003	0.009	0.004	0.007	0.103	0.014	0.064	0.014	0.033	0.765	0.096
cg07137955	0.009	0.009	0.011	0.014	0.009	0.007	0.022	0.103	0.013	0.038	0.018	0.037	0.952	0.22
cg04223424	0.012	0.017	0.014	0.015	0.008	0.01	0.025	0.09	0.015	0.061	0.014	0.005	0.935	0.231
cg25153601	0.005	0.009	0.009	0.007	0.008	0.007	0.016	0.054	0.008	0.041	0.009	0.014	0.466	0.111
cg23670932	0.017	0.02	0.017	0.016	0.017	0.017	0.037	0.098	0.025	0.129	0.059	0.023	0.45	0.129
cg25503881	0.03	0.035	0.044	0.033	0.046	0.034	0.042	0.067	0.038	0.09	0.059	0.062	0.452	0.131
cg06483076	0.051	0.063	0.072	0.047	0.072	0.058	0.079	0.144	0.095	0.191	0.066	0.042	0.543	0.176
cg17012863	0.009	0.007	0.008	0.006	0.009	0.011	0.012	0.05	0.002	0.042	0.01	0.011	0.516	0.163
cg11772224	0.046	0.044	0.045	0.037	0.043	0.039	0.044	0.083	0.042	0.091	0.046	0.063	0.575	0.227
cg25951501	0.009	0.009	0.01	0.015	0.011	0.013	0.054	0.119	0.004	0.089	0.009	0.016	0.919	0.248
cg23671719	0.015	0.02	0.018	0.018	0.019	0.015	0.029	0.079	0.007	0.05	0.015	0.015	0.361	0.028
cg23100979	0.005	0.007	0.009	0.009	0.005	0.004	0.012	0.071	0.011	0.046	0.023	0.004	0.33	0.014
cg14226678	0.035	0.034	0.044	0.034	0.035	0.035	0.039	0.087	0.009	0.04	0.011	0.022	0.358	0.054
cg19091784	0.009	0.011	0.012	0.029	0.014	0.012	0.015	0.046	0.054	0.031	0.007	0.004	0.577	0.152
cg26029997	0.011	0.013	0.014	0.033	0.013	0.015	0.051	0.122	0.069	0.058	0.003	0.019	0.554	0.143
cg09692335	0.04	0.04	0.04	0.041	0.039	0.039	0.051	0.055	0.047	0.078	0.055	0.063	0.268	0.08
cg04689082	0.004	0.005	0.006	0.005	0.006	0.003	0.001	0.051	0.002	0.042	0.001	0.021	0.403	0.13
cg04358131	0.011	0.027	0.006	0.005	0.016	0.005	0.012	0.053	0.139	0.045	0.034	0.028	0.687	0.101
cg13488570	0.01	0.012	0.01	0.011	0.014	0.011	0.022	0.074	0.008	0.032	0.033	0.066	0.601	0.12
cg21708354	0.004	0.005	0.003	0.002	0.004	0.003	0.001	0.044	0.008	0.034	0.004	0.006	0.222	0.046
cg13997649	0.004	0.002	0.002	0.005	0.005	0.002	0.001	0.043	0.005	0.036	0.018	0.012	0.211	0.049
cg08589960	0.008	0.011	0.011	0.008	0.011	0.007	0.015	0.048	0.139	0.031	0.01	0.03	0.651	0.162
cg03891598	0.021	0.018	0.019	0.02	0.021	0.018	0.021	0.078	0.191	0.057	0.05	0.037	0.659	0.178
cg00187635	0.016	0.031	0.029	0.012	0.011	0.028	0.047	0.137	0.168	0.111	0.034	0.076	0.715	0.233
cg04789589	0.023	0.025	0.025	0.025	0.026	0.02	0.054	0.073	0.03	0.087	0.02	0.038	0.684	0.076
cg08870433	0.021	0.006	0.009	0.005	0.013	0.006	0.011	0.018	0.054	0.032	0.023	0.024	0.411	0.094
cg13173898	0.01	0.01	0.012	0.014	0.011	0.013	0.037	0.061	0.03	0.041	0.025	0.047	0.605	0.161
cg09398185	0.031	0.025	0.035	0.026	0.032	0.026	0.037	0.077	0.038	0.077	0.038	0.047	0.737	0.112
cg11109809	0.013	0.008	0.016	0.017	0.011	0.014	0.012	0.06	0.015	0.028	0	0.007	0.463	0.181
cg14427694	0.041	0.039	0.041	0.051	0.039	0.041	0.043	0.058	0.044	0.067	0.044	0.05	0.429	0.184
cg08988364	0.004	0.003	0.003	0.003	0.005	0.004	0.003	0.056	0.089	0.092	0.014	0.008	0.352	0.011
cg21594646	0.041	0.052	0.058	0.042	0.046	0.053	0.056	0.12	0.017	0.062	0.041	0.042	0.486	0.177
cg13909555	0.024	0.024	0.029	0.025	0.025	0.026	0.023	0.083	0.005	0.037	0	0.001	0.562	0.178
cg24838654	0.016	0.016	0.024	0.016	0.025	0.012	0.012	0.052	0.016	0.068	0.018	0.009	0.565	0.2
cg18023401	0.043	0.048	0.06	0.04	0.065	0.056	0.07	0.122	0.059	0.107	0.045	0.023	0.678	0.132
cg21708354	0.004	0.005	0.003	0.002	0.004	0.003	0.001	0.044	0.008	0.034	0.004	0.006	0.222	0.046
cg13997649	0.004	0.002	0.002	0.005	0.005	0.002	0.001	0.043	0.005	0.036	0.018	0.012	0.211	0.049
cg01971612	0.006	0.006	0.006	0.008	0.006	0.008	0.011	0.081	0.008	0.044	0.012	0.006	0.336	0.096
cg18485485	0.014	0.015	0.016	0.014	0.014	0.013	0.02	0.074	0.011	0.051	0.004	0.005	0.363	0.113
cg21698802	0.05	0.053	0.053	0.048	0.051	0.049	0.053	0.07	0.061	0.072	0.072	0.069	0.326	0.143
cg26727807	0.026	0.029	0.029	0.037	0.033	0.033	0.049	0.187	0.036	0.144	0.077	0.031	0.483	0.074
cg18094824	0.024	0.024	0.024	0.021	0.024	0.018	0.025	0.054	0.022	0.088	0.058	0.046	0.643	0.147
cg12280168	0.012	0.015	0.013	0.009	0.018	0.01	0.007	0.071	0.011	0.042	0	0.017	0.344	0.085
cg09384137	0.042	0.049	0.045	0.044	0.046	0.044	0.044	0.082	0.042	0.093	0.037	0.038	0.346	0.119
cg23671719	0.015	0.02	0.018	0.018	0.019	0.015	0.029	0.079	0.007	0.05	0.015	0.015	0.361	0.028
cg23100979	0.005	0.007	0.009	0.009	0.005	0.004	0.012	0.071	0.011	0.046	0.023	0.004	0.33	0.014
cg14226678	0.035	0.034	0.044	0.034	0.035	0.035	0.039	0.087	0.009	0.04	0.011	0.022	0.358	0.054
cg16395953	0.029	0.023	0.026	0.025	0.03	0.017	0.036	0.114	0.027	0.098	0.025	0.058	0.627	0.081
cg18323912	0.035	0.033	0.039	0.032	0.034	0.031	0.03	0.092	0.055	0.078	0.075	0.038	0.864	0.241
cg19542119	0.003	0.005	0.006	0.006	0.014	0.003	0.018	0.092	0.004	0.259	0	0.021	0.621	0.155
cg10196802	0.091	0.091	0.097	0.09	0.092	0.083	0.049	0.156	0.027	0.075	0.057	0.063	0.45	0.228
cg14505161	0.009	0.011	0.015	0.019	0.011	0.01	0.021	0.051	0.03	0.032	0.019	0.003	0.433	0.182
cg11387077	0.095	0.096	0.099	0.091	0.086	0.105	0.086	0.21	0.012	0.084	0.063	0.086	0.539	0.269
cg12881726	0.011	0.016	0.016	0.021	0.011	0.01	0.014	0.056	0.014	0.033	0.007	0.004	0.316	0.128
cg23780937	0.061	0.064	0.055	0.061	0.052	0.059	0.065	0.095	0.074	0.081	0.089	0.065	0.438	0.217
cg07448606	0.006	0.005	0.007	0.004	0.015	0.007	0.009	0.111	0.015	0.047	0	0.003	0.681	0.425
cg12938565	0.012	0.013	0.013	0.011	0.009	0.01	0.012	0.071	0.004	0.059	0.005	0.014	0.878	0.621
cg12281798	0.007	0.011	0.008	0.012	0.013	0.009	0.01	0.069	0.01	0.093	0.019	0.001	0.89	0.605
cg14380270	0.01	0.012	0.016	0.011	0.014	0.011	0.008	0.065	0.032	0.483	0.076	0.034	0.888	0.242
cg18608369	0.015	0.014	0.014	0.013	0.011	0.015	0.012	0.051	0.012	0.411	0.012	0.028	0.845	0.221
cg01348733	0.032	0.03	0.035	0.029	0.034	0.033	0.03	0.08	0.026	0.495	0.066	0.099	0.827	0.249
cg05224998	0.023	0.024	0.027	0.027	0.029	0.025	0.022	0.105	0.044	0.213	0.05	0.066	0.79	0.211
cg14085527	0.02	0.022	0.051	0.019	0.015	0.01	0.01	0.122	0.041	0.061	0.014	0.037	0.59	0.158
cg03870746	0.052	0.055	0.077	0.061	0.061	0.045	0.068	0.131	0.052	0.092	0.052	0.069	0.573	0.212
cg17184704	0.022	0.022	0.023	0.018	0.024	0.023	0.128	0.064	0.087	0.085	0.042	0.009	0.765	0.209
cg15406666	0.017	0.022	0.022	0.017	0.019	0.023	0.034	0.083	0.021	0.04	0.038	0.008	0.504	0.156
cg20483560	0.041	0.043	0.041	0.043	0.042	0.04	0.04	0.062	0.041	0.09	0.033	0.063	0.476	0.177
cg16609855	0.054	0.054	0.061	0.054	0.053	0.06	0.067	0.077	0.057	0.081	0.058	0.091	0.488	0.185
cg16398628	0.049	0.046	0.06	0.048	0.053	0.053	0.056	0.086	0.052	0.125	0.048	0.037	0.216	0.1
cg01971612	0.006	0.006	0.006	0.008	0.006	0.008	0.011	0.081	0.008	0.044	0.012	0.006	0.336	0.096
cg18485485	0.014	0.015	0.016	0.014	0.014	0.013	0.02	0.074	0.011	0.051	0.004	0.005	0.363	0.113
cg21698802	0.05	0.053	0.053	0.048	0.051	0.049	0.053	0.07	0.061	0.072	0.072	0.069	0.326	0.143
cg13272280	0.007	0.009	0.008	0.009	0.008	0.007	0.012	0.041	0.036	0.18	0.032	0.002	0.85	0.505
cg19690766	0.062	0.063	0.071	0.062	0.061	0.057	0.08	0.082	0.065	0.38	0.073	0.093	0.919	0.751
cg19091784	0.009	0.011	0.012	0.029	0.014	0.012	0.015	0.046	0.054	0.031	0.007	0.004	0.577	0.152
cg26029997	0.011	0.013	0.014	0.033	0.013	0.015	0.051	0.122	0.069	0.058	0.003	0.019	0.554	0.143
cg09692335	0.04	0.04	0.04	0.041	0.039	0.039	0.051	0.055	0.047	0.078	0.055	0.063	0.268	0.08
cg14979301	0.01	0.008	0.015	0.008	0.01	0.013	0.021	0.254	0.085	0.085	0.112	0.03	0.963	0.331
cg09517106	0.035	0.039	0.033	0.037	0.034	0.035	0.078	0.13	0.037	0.14	0.062	0.051	0.826	0.141
cg11563399	0.017	0.033	0.026	0.025	0.029	0.019	0.047	0.158	0.018	0.039	0.023	0.035	0.931	0.496
cg13254588	0.057	0.06	0.062	0.056	0.054	0.065	0.062	0.222	0.061	0.081	0.132	0.08	0.668	0.435
cg16273524	0.008	0.009	0.01	0.007	0.006	0.008	0.015	0.075	0.002	0.045	0.016	0.022	0.648	0.451
cg01247919	0.038	0.034	0.035	0.036	0.034	0.033	0.03	0.063	0.049	0.087	0.016	0.043	0.57	0.104
cg06886207	0.007	0.009	0.01	0.011	0.009	0.006	0.024	0.055	0.003	0.04	0.011	0.013	0.265	0.083
cg14286274	0.014	0.015	0.017	0.017	0.014	0.016	0.023	0.1	0.022	0.045	0.015	0.017	0.234	0.08
cg26255011	0.03	0.032	0.038	0.037	0.033	0.042	0.047	0.098	0.039	0.076	0.05	0.026	0.261	0.121
cg19003430	0.037	0.045	0.052	0.048	0.045	0.047	0.064	0.047	0.062	0.092	0.14	0.014	0.525	0.28
cg25294785	0.016	0.012	0.017	0.018	0.018	0.025	0.022	0.054	0.011	0.031	0.073	0	0.528	0.262
cg14505161	0.009	0.011	0.015	0.019	0.011	0.01	0.021	0.051	0.03	0.032	0.019	0.003	0.433	0.182
cg12881726	0.011	0.016	0.016	0.021	0.011	0.01	0.014	0.056	0.014	0.033	0.007	0.004	0.316	0.128
cg12581244	0.026	0.027	0.025	0.028	0.025	0.029	0.069	0.157	0.019	0.194	0.032	0.033	0.851	0.257
cg18411103	0.066	0.07	0.073	0.068	0.063	0.068	0.084	0.101	0.085	0.195	0.12	0.092	0.744	0.262
cg10661629	0.016	0.013	0.012	0.012	0.013	0.009	0.024	0.083	0.02	0.053	0.054	0.038	0.427	0.115
cg15784913	0.024	0.02	0.02	0.018	0.025	0.024	0.024	0.126	0.014	0.037	0.016	0.045	0.457	0.125
cg03108330	0.032	0.034	0.036	0.031	0.031	0.033	0.052	0.124	0.024	0.071	0.037	0.041	0.379	0.135
cg09290735	0.016	0.022	0.037	0.027	0.063	0.016	0.013	0.063	0.015	0.104	0.007	0.013	0.588	0.245
cg03317082	0.029	0.031	0.034	0.034	0.037	0.031	0.047	0.06	0.038	0.065	0.035	0.042	0.496	0.059
cg18608369	0.015	0.014	0.014	0.013	0.011	0.015	0.012	0.051	0.012	0.411	0.012	0.028	0.845	0.221
cg01348733	0.032	0.03	0.035	0.029	0.034	0.033	0.03	0.08	0.026	0.495	0.066	0.099	0.827	0.249
cg05224998	0.023	0.024	0.027	0.027	0.029	0.025	0.022	0.105	0.044	0.213	0.05	0.066	0.79	0.211
cg10911913	0.034	0.035	0.031	0.032	0.041	0.033	0.032	0.054	0.062	0.198	0.049	0.075	0.811	0.24
cg08589960	0.008	0.011	0.011	0.008	0.011	0.007	0.015	0.048	0.139	0.031	0.01	0.03	0.651	0.162
cg03891598	0.021	0.018	0.019	0.02	0.021	0.018	0.021	0.078	0.191	0.057	0.05	0.037	0.659	0.178
cg00187635	0.016	0.031	0.029	0.012	0.011	0.028	0.047	0.137	0.168	0.111	0.034	0.076	0.715	0.233
cg07058528	0.007	0.006	0.005	0.004	0.005	0.004	0.004	0.047	0.011	0.049	0.012	0.034	0.219	0.055
cg16705383	0.003	0.006	0.004	0.005	0.005	0.003	0.01	0.041	0.035	0.03	0.038	0.004	0.458	0.326
cg09460983	0.03	0.036	0.036	0.033	0.032	0.038	0.031	0.092	0.076	0.09	0.096	0.046	0.618	0.057
cg20556744	0.121	0.13	0.121	0.154	0.137	0.123	0.119	0.282	0.026	0.265	0.083	0.149	0.931	0.858
cg17568255	0.013	0.016	0.018	0.01	0.014	0.014	0.018	0.078	0.021	0.283	0.005	0.086	0.948	0.861
cg05986044	0.009	0.01	0.012	0.007	0.008	0.006	0.005	0.067	0.005	0.068	0	0.083	0.969	0.804
cg01417553	0.06	0.061	0.062	0.056	0.056	0.062	0.075	0.103	0.074	0.236	0.078	0.104	0.865	0.801
cg05224998	0.023	0.024	0.027	0.027	0.029	0.025	0.022	0.105	0.044	0.213	0.05	0.066	0.79	0.211
cg10911913	0.034	0.035	0.031	0.032	0.041	0.033	0.032	0.054	0.062	0.198	0.049	0.075	0.811	0.24
cg15550572	0.02	0.029	0.029	0.024	0.03	0.031	0.022	0.053	0.053	0.121	0.02	0.044	0.544	0.141
cg10661629	0.016	0.013	0.012	0.012	0.013	0.009	0.024	0.083	0.02	0.053	0.054	0.038	0.427	0.115
cg15784913	0.024	0.02	0.02	0.018	0.025	0.024	0.024	0.126	0.014	0.037	0.016	0.045	0.457	0.125
cg24623434	0.006	0.014	0.003	0.003	0.004	0.004	0.013	0.084	0.004	0.074	0	0.003	0.256	0.079
cg05380741	0.074	0.088	0.075	0.072	0.079	0.076	0.058	0.292	0.029	0.134	0.031	0.045	0.12	0.081
cg14380270	0.01	0.012	0.016	0.011	0.014	0.011	0.008	0.065	0.032	0.483	0.076	0.034	0.888	0.242
cg18608369	0.015	0.014	0.014	0.013	0.011	0.015	0.012	0.051	0.012	0.411	0.012	0.028	0.845	0.221
cg01348733	0.032	0.03	0.035	0.029	0.034	0.033	0.03	0.08	0.026	0.495	0.066	0.099	0.827	0.249
cg02430347	0.006	0.011	0.01	0.007	0.02	0.008	0.009	0.044	0.036	0.029	0.005	0.013	0.671	0.567
cg00281842	0.005	0.011	0.017	0.008	0.036	0.005	0.009	0.043	0.085	0.028	0.031	0.023	0.69	0.597
cg23359276	0.011	0.013	0.018	0.016	0.014	0.013	0.024	0.105	0.018	0.056	0.016	0.009	0.609	0.512
cg03894174	0.053	0.051	0.057	0.043	0.049	0.048	0.055	0.078	0.055	0.086	0.053	0.096	0.834	0.234
cg27258025	0.019	0.03	0.025	0.024	0.038	0.02	0.031	0.124	0.027	0.464	0.031	0.075	0.788	0.158
cg03077453	0.109	0.183	0.194	0.118	0.24	0.082	0.091	0.103	0.06	0.404	0.056	0.21	0.86	0.208
cg14025336	0.07	0.134	0.147	0.089	0.174	0.049	0.076	0.124	0.038	0.354	0.082	0.141	0.818	0.19
cg20725941	0.036	0.052	0.057	0.032	0.048	0.032	0.053	0.121	0.017	0.249	0	0.072	0.798	0.16
cg12950007	0.065	0.102	0.092	0.072	0.109	0.062	0.081	0.121	0.067	0.498	0.093	0.144	0.807	0.208
cg26468430	0.017	0.07	0.032	0.029	0.114	0.014	0.031	0.114	0.073	0.06	0.032	0.021	0.637	0.138
cg13438944	0.042	0.043	0.043	0.045	0.041	0.043	0.049	0.062	0.049	0.089	0.055	0.057	0.791	0.31
cg14813417	0.022	0.027	0.029	0.032	0.034	0.022	0.038	0.108	0.022	0.114	0.016	0.037	0.48	0.066
[truncated: 2,125 more rows]

## Sheet: 25CT_Ref_Atlas_FigS1
CpG	Monocytes EPIC	B-cells EPIC	CD4T-cells EPIC	NK-cells EPIC	CD8T-cells EPIC	Neutrophils EPIC	Erythrocyte progenitors	Adipocytes	Cortical neurons	Hepatocytes	Lung cells	Pancreatic beta cells	Pancreatic acinar cells	Pancreatic duct cells	Vascular endothelial cells	Colon epithelial cells	Left atrium	Bladder	Breast	Head and neck larynx	Kidney	Prostate	Thyroid	Upper GI	Uterus cervix
[truncated: 7,390 more rows]

[truncated: 1 more sheets: n199_Surv_clinical_data]
